# Supplementary material for: A Novel lncRNA Regulates the Toll-Like Receptor Signaling Pathway and Related Immune Function by Stabilizing FOS mRNA as a Competitive Endogenous RNA
Source: PubMed Central journal article supplement (PMC6478817; doi:10.3389/fimmu.2019.00838), 2019-04-17
Supplement: Image_1.pdf [file Image_1.pdf]

LW407(ψ-SV40 promoter-hRluc-XLOC\_098131(mutation)-HSV TK promoter-hluc). (D) Restriction digestion map of pHS-AVC-LW407. (E) Overexpression of mir-548s plasmid pHS-AMR-LW010 (pZDonor\_hef1a-EYFP-T2A-puro-hsa-mir-548ah). (F) pHS-AMR-LW011 (pZDonor\_hef1a-EYFP-T2A-puro-hsa-mir-548ay). (G) pHS-AMR-LW012 (pZDonor\_hef1a-EYFP-T2A-puro-hsa-mir-548e). (H) Control mi plasmid pHS-AMR-LW013 (pZDonor\_hef1a-EYFP-T2A-puro-control miRNA (FF5))
