# Supplementary material for: A Novel lncRNA Regulates the Toll-Like Receptor Signaling Pathway and Related Immune Function by Stabilizing FOS mRNA as a Competitive Endogenous RNA
Source: PubMed Central journal article supplement (PMC6478817; doi:10.3389/fimmu.2019.00838), 2019-04-17
Supplement: Image_3.pdf [file Image_3.pdf]

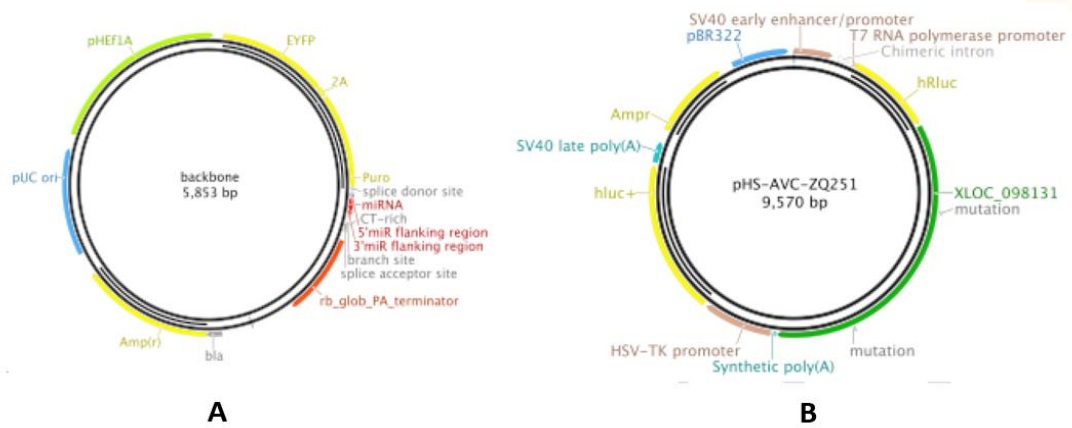

Figure S3. Constructed constructs of the experiment to test the combined ability of XLOC\_098131 and mir-1180s. (A) Overexpression of mir-1180s plasmid pHS-AMR-ZQ011 (pZDonor\_hef1a-EYFP-T2A-puro-hsa-mir-1180-5P) and pHS-AMR-ZQ012 (pZDonor\_hef1a-EYFP-T2A-puro-hsa-mir-1180-3P). (B) A mutant expression plasmid of XLOC\_098131 without predicted miR-1180s binding sites, named pHS-AVC-LW251 (psi-SV40 promoter-hRluc-XLOC-098131 (mutant) -HSV TK promote hLuc)
