# Supplementary material for: A Novel lncRNA Regulates the Toll-Like Receptor Signaling Pathway and Related Immune Function by Stabilizing FOS mRNA as a Competitive Endogenous RNA
Source: Front Immunol. 2019 Apr 17;10:838. doi: 10.3389/fimmu.2019.00838 (PMC6478817; doi:10.3389/fimmu.2019.00838)
Supplement: Supplementary file 3 [file Table_3.xlsx]

## Sheet: biological process
maxLevel	levels	GO_Name	GO_ID	Pvalue	Pvalue_adjusted	PAS_Value	PAS_Zscore	max_zscore	min_zscore	Genes	Count	Pop_Hit	List_Total	Background_Genes	URL	PATHS
3	3	single-organism metabolic process	GO:0044710	6.32e-07	0.000521	-11.73	-5.58	6.85695	-11.527	CAV2|0.417;CERS6|0.346;CDH2|1.906;SOD3|0.184;CDO1|0.672;SLC25A25|0.627;ACSL1|0.614;MST1R|1.705;SLC2A2|0.635;ENPP2|0.6;ECI2|0.596;CYR61|2.231;PANK1|0.639;JUN|2.208;PPARGC1A|0.564;HKDC1|2.366;MAOA|0.614;GPX2|7.618;SIK1|1.694;BCO1|0.596;KIAA1324|5.521;CS|1.611;PIPOX|1.809;IRS2|1.866;KL|3.059;AGPAT2|1.693;LPAR3|2.868;SLC6A14|0.423;COX7C|0.658;SLC5A3|1.572;ANKRD6|0.513;Gga.6352|0.616;LIPI|0.594;DUSP8|…	38	5198	76	21829	http://www.ebi.ac.uk/QuickGO/GTerm?id=GO:0044710	[]
3	3	single-organism cellular process	GO:0044763	7.35e-07	0.000521	-19.73	-9.29	6.85695	-11.527	RIC3|0.491;LRFN5|1.736;NIM1K|1.617;CAV2|0.417;CERS6|0.346;ADAMTS9|0.583;CDH2|1.906;SOD3|0.184;CDO1|0.672;PROM1|0.467;SLC25A25|0.627;CRCP|0.599;ACSL1|0.614;MST1R|1.705;SLC2A2|0.635;FAT1|0.605;GFRA3|0.646;CHAC1|0.521;ENPP2|0.6;EVC|0.468;ECI2|0.596;CYR61|2.231;PANK1|0.639;EGR1|2.376;JUN|2.208;PPARGC1A|0.564;TOP2A|0.53;RARA|1.526;SDK2|2.638;ATP1A1|1.604;FOS|3.316;IGFBP1|0.446;WFDC1|0.417;HKDC1|2.366;…	62	11925	76	21829	http://www.ebi.ac.uk/QuickGO/GTerm?id=GO:0044763	[]
2	2	single-organism process	GO:0044699	8.94e-07	0.000521	-24.56	-11.53	6.85695	-11.527	SIDT1|5.384;RIC3|0.491;LRFN5|1.736;NIM1K|1.617;CAV2|0.417;CERS6|0.346;ADAMTS1|1.877;ADAMTS9|0.583;CDH2|1.906;SOD3|0.184;CDO1|0.672;PROM1|0.467;SLC25A25|0.627;CRCP|0.599;ACSL1|0.614;MST1R|1.705;SLC2A2|0.635;FAT1|0.605;GFRA3|0.646;CHAC1|0.521;ENPP2|0.6;EVC|0.468;ECI2|0.596;CYR61|2.231;PANK1|0.639;EGR1|2.376;JUN|2.208;PPARGC1A|0.564;TOP2A|0.53;RARA|1.526;SDK2|2.638;ATP1A1|1.604;FOS|3.316;IGFBP1|0.44…	70	14985	76	21829	http://www.ebi.ac.uk/QuickGO/GTerm?id=GO:0044699	[]
4	4	response to oxygen-containing compound	GO:1901700	1.16e-06	0.000521	6.11	2.69	6.85695	-11.527	CAV2|0.417;SOD3|0.184;EGR1|2.376;JUN|2.208;RARA|1.526;FOS|3.316;CCK1R|5.905;BCO1|0.596;IRS2|1.866;KL|3.059;CRHR2|2.007;TRPA1|0.123;JAG1|1.703;PDK4|0.421	14	847	76	21829	http://www.ebi.ac.uk/QuickGO/GTerm?id=GO:1901700	[]
5	5	response to peptide	GO:1901652	1.51e-06	0.000544	3.19	1.34	6.85695	-11.527	CAV2|0.417;EGR1|2.376;CCK1R|5.905;IRS2|1.866;KL|3.059;CRHR2|2.007;JAG1|1.703;PDK4|0.421	8	233	76	21829	http://www.ebi.ac.uk/QuickGO/GTerm?id=GO:1901652	[]
7	6,7	fatty acid oxidation	GO:0019395	2.29e-06	0.000688	-1.36	-0.77	6.85695	-11.527	PPARGC1A|0.564;IRS2|1.866;Gga.6352|0.616;PDK4|0.421;HAO2|0.556	5	61	76	21829	http://www.ebi.ac.uk/QuickGO/GTerm?id=GO:0019395	[]
6	5,6	lipid oxidation	GO:0034440	2.69e-06	0.000691	-1.36	-0.77	6.85695	-11.527	PPARGC1A|0.564;IRS2|1.866;Gga.6352|0.616;PDK4|0.421;HAO2|0.556	5	63	76	21829	http://www.ebi.ac.uk/QuickGO/GTerm?id=GO:0034440	[]
4	4	oxidation-reduction process	GO:0055114	3.06e-06	0.000691	-5.33	-2.61	6.85695	-11.527	SOD3|0.184;CDO1|0.672;SLC25A25|0.627;PPARGC1A|0.564;MAOA|0.614;GPX2|7.618;BCO1|0.596;CS|1.611;PIPOX|1.809;IRS2|1.866;KL|3.059;COX7C|0.658;Gga.6352|0.616;LDHB|0.618;PDK4|0.421;HAO2|0.556;GSTK1|0.636	17	1352	76	21829	http://www.ebi.ac.uk/QuickGO/GTerm?id=GO:0055114	[]
4	4	small molecule metabolic process	GO:0044281	3.6e-06	0.000722	-5.04	-2.48	6.85695	-11.527	CDO1|0.672;SLC25A25|0.627;ACSL1|0.614;SLC2A2|0.635;ENPP2|0.6;ECI2|0.596;PANK1|0.639;PPARGC1A|0.564;HKDC1|2.366;SIK1|1.694;BCO1|0.596;CS|1.611;PIPOX|1.809;IRS2|1.866;SLC6A14|0.423;COX7C|0.658;SLC5A3|1.572;Gga.6352|0.616;LDHB|0.618;PDK4|0.421;HAO2|0.556	21	2025	76	21829	http://www.ebi.ac.uk/QuickGO/GTerm?id=GO:0044281	[]
4	4	cellular lipid metabolic process	GO:0044255	4.21e-06	0.000759	-3.51	-1.77	6.85695	-11.527	CERS6|0.346;ACSL1|0.614;ENPP2|0.6;ECI2|0.596;CYR61|2.231;PPARGC1A|0.564;SIK1|1.694;BCO1|0.596;IRS2|1.866;AGPAT2|1.693;Gga.6352|0.616;PDK4|0.421;HAO2|0.556	13	813	76	21829	http://www.ebi.ac.uk/QuickGO/GTerm?id=GO:0044255	[]
5	4,5	cell surface receptor signaling pathway	GO:0007166	7.56e-06	0.00124	3.92	1.68	6.85695	-11.527	CAV2|0.417;CDH2|1.906;ACSL1|0.614;MST1R|1.705;CHAC1|0.521;EVC|0.468;CYR61|2.231;EGR1|2.376;FOS|3.316;IGFBP1|0.446;KIAA1324|5.521;CHRDL1|0.429;IRS2|1.866;KL|3.059;CRHR2|2.007;TRPA1|0.123;ANKRD6|0.513;EVC2|0.376;JAG1|1.703;MCC|2.125;PDK4|0.421	21	2123	76	21829	http://www.ebi.ac.uk/QuickGO/GTerm?id=GO:0007166	[]
4	4	response to hormone	GO:0009725	1.56e-05	0.00221	3.7	1.57	6.85695	-11.527	CAV2|0.417;ACSL1|0.614;EGR1|2.376;JUN|2.208;RARA|1.526;CCK1R|5.905;IRS2|1.866;KL|3.059;CRHR2|2.007;PDK4|0.421	10	533	76	21829	http://www.ebi.ac.uk/QuickGO/GTerm?id=GO:0009725	[]
3	3	response to endogenous stimulus	GO:0009719	1.66e-05	0.00221	5.17	2.25	6.85695	-11.527	CAV2|0.417;ACSL1|0.614;CYR61|2.231;EGR1|2.376;JUN|2.208;RARA|1.526;FOS|3.316;CCK1R|5.905;CHRDL1|0.429;IRS2|1.866;KL|3.059;CRHR2|2.007;JAG1|1.703;PDK4|0.421	14	1068	76	21829	http://www.ebi.ac.uk/QuickGO/GTerm?id=GO:0009719	[]
4	4	cellular response to endogenous stimulus	GO:0071495	1.71e-05	0.00221	4.94	2.15	6.85695	-11.527	CAV2|0.417;ACSL1|0.614;CYR61|2.231;EGR1|2.376;JUN|2.208;RARA|1.526;FOS|3.316;CCK1R|5.905;CHRDL1|0.429;IRS2|1.866;KL|3.059;CRHR2|2.007;PDK4|0.421	13	927	76	21829	http://www.ebi.ac.uk/QuickGO/GTerm?id=GO:0071495	[]
4	4	lipid metabolic process	GO:0006629	2.35e-05	0.00275	-3.74	-1.87	6.85695	-11.527	CERS6|0.346;ACSL1|0.614;ENPP2|0.6;ECI2|0.596;CYR61|2.231;PPARGC1A|0.564;SIK1|1.694;BCO1|0.596;IRS2|1.866;AGPAT2|1.693;Gga.6352|0.616;LIPI|0.594;PDK4|0.421;HAO2|0.556	14	1102	76	21829	http://www.ebi.ac.uk/QuickGO/GTerm?id=GO:0006629	[]
5	5	fatty acid metabolic process	GO:0006631	2.45e-05	0.00275	-1.8	-0.98	6.85695	-11.527	ACSL1|0.614;ECI2|0.596;PPARGC1A|0.564;IRS2|1.866;Gga.6352|0.616;PDK4|0.421;HAO2|0.556	7	247	76	21829	http://www.ebi.ac.uk/QuickGO/GTerm?id=GO:0006631	[]
6	6	carboxylic acid metabolic process	GO:0019752	2.64e-05	0.00275	-3.39	-1.71	6.85695	-11.527	CDO1|0.672;ACSL1|0.614;ECI2|0.596;PPARGC1A|0.564;HKDC1|2.366;CS|1.611;PIPOX|1.809;IRS2|1.866;SLC6A14|0.423;Gga.6352|0.616;LDHB|0.618;PDK4|0.421;HAO2|0.556	13	966	76	21829	http://www.ebi.ac.uk/QuickGO/GTerm?id=GO:0019752	[]
7	7	monocarboxylic acid metabolic process	GO:0032787	2.74e-05	0.00275	-2.38	-1.25	6.85695	-11.527	ACSL1|0.614;ECI2|0.596;PPARGC1A|0.564;HKDC1|2.366;IRS2|1.866;Gga.6352|0.616;LDHB|0.618;PDK4|0.421;HAO2|0.556	9	453	76	21829	http://www.ebi.ac.uk/QuickGO/GTerm?id=GO:0032787	[]
5	5	cellular response to hormone stimulus	GO:0032870	2.94e-05	0.00279	3.33	1.4	6.85695	-11.527	CAV2|0.417;ACSL1|0.614;JUN|2.208;RARA|1.526;CCK1R|5.905;IRS2|1.866;KL|3.059;CRHR2|2.007;PDK4|0.421	9	457	76	21829	http://www.ebi.ac.uk/QuickGO/GTerm?id=GO:0032870	[]
8	7,8	regulation of fatty acid oxidation	GO:0046320	3.19e-05	0.00287	-0.27	-0.27	6.85695	-11.527	PPARGC1A|0.564;IRS2|1.866;PDK4|0.421	3	18	76	21829	http://www.ebi.ac.uk/QuickGO/GTerm?id=GO:0046320	[]
4	4	system development	GO:0048731	3.44e-05	0.00296	8.43	3.77	6.85695	-11.527	LRFN5|1.736;CAV2|0.417;ADAMTS1|1.877;CDH2|1.906;PROM1|0.467;SLC25A25|0.627;GFRA3|0.646;CHAC1|0.521;ENPP2|0.6;EVC|0.468;CYR61|2.231;EGR1|2.376;PPARGC1A|0.564;RARA|1.526;SDK2|2.638;FOS|3.316;SIK1|1.694;CCK1R|5.905;CHRDL1|0.429;IRS2|1.866;KL|3.059;LPAR3|2.868;CRHR2|2.007;SLC5A3|1.572;ANKRD6|0.513;JAG1|1.703	26	3339	76	21829	http://www.ebi.ac.uk/QuickGO/GTerm?id=GO:0048731	[]
5	5	oxoacid metabolic process	GO:0043436	5.02e-05	0.00412	-3.39	-1.71	6.85695	-11.527	CDO1|0.672;ACSL1|0.614;ECI2|0.596;PPARGC1A|0.564;HKDC1|2.366;CS|1.611;PIPOX|1.809;IRS2|1.866;SLC6A14|0.423;Gga.6352|0.616;LDHB|0.618;PDK4|0.421;HAO2|0.556	13	1028	76	21829	http://www.ebi.ac.uk/QuickGO/GTerm?id=GO:0043436	[]
4	4	organic acid metabolic process	GO:0006082	5.77e-05	0.00452	-3.39	-1.71	6.85695	-11.527	CDO1|0.672;ACSL1|0.614;ECI2|0.596;PPARGC1A|0.564;HKDC1|2.366;CS|1.611;PIPOX|1.809;IRS2|1.866;SLC6A14|0.423;Gga.6352|0.616;LDHB|0.618;PDK4|0.421;HAO2|0.556	13	1042	76	21829	http://www.ebi.ac.uk/QuickGO/GTerm?id=GO:0006082	[]
5	5	response to organonitrogen compound	GO:0010243	6.27e-05	0.00471	3.54	1.5	6.85695	-11.527	CAV2|0.417;EGR1|2.376;JUN|2.208;CCK1R|5.905;IRS2|1.866;KL|3.059;CRHR2|2.007;JAG1|1.703;PDK4|0.421	9	504	76	21829	http://www.ebi.ac.uk/QuickGO/GTerm?id=GO:0010243	[]
4	4	multicellular organism development	GO:0007275	7.77e-05	0.00545	8.67	3.88	6.85695	-11.527	LRFN5|1.736;CAV2|0.417;ADAMTS1|1.877;ADAMTS9|0.583;CDH2|1.906;PROM1|0.467;SLC25A25|0.627;GFRA3|0.646;CHAC1|0.521;ENPP2|0.6;EVC|0.468;CYR61|2.231;EGR1|2.376;PPARGC1A|0.564;RARA|1.526;SDK2|2.638;FOS|3.316;SIK1|1.694;CCK1R|5.905;CHRDL1|0.429;IRS2|1.866;KL|3.059;LPAR3|2.868;CRHR2|2.007;SLC5A3|1.572;ANKRD6|0.513;JAG1|1.703	27	3714	76	21829	http://www.ebi.ac.uk/QuickGO/GTerm?id=GO:0007275	[]
5	5	response to peptide hormone	GO:0043434	7.85e-05	0.00545	2.19	0.87	6.85695	-11.527	CAV2|0.417;EGR1|2.376;IRS2|1.866;KL|3.059;CRHR2|2.007;PDK4|0.421	6	204	76	21829	http://www.ebi.ac.uk/QuickGO/GTerm?id=GO:0043434	[]
9	6,7,8,9	regulation of MAPK cascade	GO:0043408	8.82e-05	0.00589	3.01	1.25	6.85695	-11.527	CAV2|0.417;CDH2|1.906;MST1R|1.705;CYR61|2.231;JUN|2.208;KL|3.059;LPAR3|2.868;ANKRD6|0.513;DUSP8|1.567	9	527	76	21829	http://www.ebi.ac.uk/QuickGO/GTerm?id=GO:0043408	[]
3	3	response to chemical	GO:0042221	0.000132	0.00813	-8.28	-3.98	6.85695	-11.527	CAV2|0.417;SOD3|0.184;SLC25A25|0.627;ACSL1|0.614;GFRA3|0.646;ENPP2|0.6;CYR61|2.231;EGR1|2.376;JUN|2.208;PPARGC1A|0.564;RARA|1.526;FOS|3.316;CCK1R|5.905;BCO1|0.596;CHRDL1|0.429;IRS2|1.866;KL|3.059;SLC6A14|0.423;CRHR2|2.007;TRPA1|0.123;JAG1|1.703;PDK4|0.421	22	2772	76	21829	http://www.ebi.ac.uk/QuickGO/GTerm?id=GO:0042221	[]
6	6	response to insulin	GO:0032868	0.000134	0.00813	0.76	0.21	6.85695	-11.527	CAV2|0.417;EGR1|2.376;IRS2|1.866;KL|3.059;PDK4|0.421	5	141	76	21829	http://www.ebi.ac.uk/QuickGO/GTerm?id=GO:0032868	[]
3	3	regulation of signaling	GO:0023051	0.000142	0.00813	7.36	3.27	6.85695	-11.527	CAV2|0.417;CDH2|1.906;MST1R|1.705;CHAC1|0.521;EVC|0.468;CYR61|2.231;EGR1|2.376;JUN|2.208;IGFBP1|0.446;CCK1R|5.905;KIAA1324|5.521;CHRDL1|0.429;IRS2|1.866;KL|3.059;LPAR3|2.868;CRHR2|2.007;ANKRD6|0.513;DUSP8|1.567;JAG1|1.703;MCC|2.125	20	2388	76	21829	http://www.ebi.ac.uk/QuickGO/GTerm?id=GO:0023051	[]
4	4	positive regulation of cell communication	GO:0010647	0.000144	0.00813	4.69	2.03	6.85695	-11.527	CAV2|0.417;CDH2|1.906;MST1R|1.705;EVC|0.468;CYR61|2.231;JUN|2.208;KIAA1324|5.521;IRS2|1.866;KL|3.059;LPAR3|2.868;CRHR2|2.007;ANKRD6|0.513;JAG1|1.703	13	1141	76	21829	http://www.ebi.ac.uk/QuickGO/GTerm?id=GO:0010647	[]
5	4,5	energy derivation by oxidation of organic compounds	GO:0015980	0.000144	0.00813	-0.33	-0.29	6.85695	-11.527	SLC25A25|0.627;PPARGC1A|0.564;CS|1.611;IRS2|1.866;KL|3.059;COX7C|0.658	6	228	76	21829	http://www.ebi.ac.uk/QuickGO/GTerm?id=GO:0015980	[]
4	4	generation of precursor metabolites and energy	GO:0006091	0.000149	0.00813	0.63	0.15	6.85695	-11.527	SLC25A25|0.627;PPARGC1A|0.564;HKDC1|2.366;CS|1.611;IRS2|1.866;KL|3.059;COX7C|0.658	7	329	76	21829	http://www.ebi.ac.uk/QuickGO/GTerm?id=GO:0006091	[]
4	4	response to nitrogen compound	GO:1901698	0.000166	0.00879	3.54	1.5	6.85695	-11.527	CAV2|0.417;EGR1|2.376;JUN|2.208;CCK1R|5.905;IRS2|1.866;KL|3.059;CRHR2|2.007;JAG1|1.703;PDK4|0.421	9	573	76	21829	http://www.ebi.ac.uk/QuickGO/GTerm?id=GO:1901698	[]
3	3	single-multicellular organism process	GO:0044707	0.000176	0.00908	10.51	4.73	6.85695	-11.527	LRFN5|1.736;CAV2|0.417;ADAMTS1|1.877;ADAMTS9|0.583;CDH2|1.906;PROM1|0.467;SLC25A25|0.627;GFRA3|0.646;CHAC1|0.521;ENPP2|0.6;EVC|0.468;CYR61|2.231;EGR1|2.376;PPARGC1A|0.564;RARA|1.526;SDK2|2.638;FOS|3.316;SIK1|1.694;CCK1R|5.905;CHRDL1|0.429;IRS2|1.866;KL|3.059;AGPAT2|1.693;LPAR3|2.868;CRHR2|2.007;SLC5A3|1.572;TRPA1|0.123;ANKRD6|0.513;JAG1|1.703;MCC|2.125;PDK4|0.421	31	4805	76	21829	http://www.ebi.ac.uk/QuickGO/GTerm?id=GO:0044707	[]
8	7,8	insulin receptor signaling pathway	GO:0008286	0.000193	0.00967	0	-0.14	6.85695	-11.527	CAV2|0.417;IRS2|1.866;KL|3.059;PDK4|0.421	4	82	76	21829	http://www.ebi.ac.uk/QuickGO/GTerm?id=GO:0008286	[]
6	5,6	MAPK cascade	GO:0000165	0.000198	0.00967	3.01	1.25	6.85695	-11.527	CAV2|0.417;CDH2|1.906;MST1R|1.705;CYR61|2.231;JUN|2.208;KL|3.059;LPAR3|2.868;ANKRD6|0.513;DUSP8|1.567	9	587	76	21829	http://www.ebi.ac.uk/QuickGO/GTerm?id=GO:0000165	[]
5	4,5	cellular carbohydrate metabolic process	GO:0044262	0.000209	0.0099	1.65	0.62	6.85695	-11.527	HKDC1|2.366;SIK1|1.694;CS|1.611;IRS2|1.866;SLC5A3|1.572;PDK4|0.421	6	244	76	21829	http://www.ebi.ac.uk/QuickGO/GTerm?id=GO:0044262	[]
4	4	regulation of cell communication	GO:0010646	0.000215	0.00996	7.36	3.27	6.85695	-11.527	CAV2|0.417;CDH2|1.906;MST1R|1.705;CHAC1|0.521;EVC|0.468;CYR61|2.231;EGR1|2.376;JUN|2.208;IGFBP1|0.446;CCK1R|5.905;KIAA1324|5.521;CHRDL1|0.429;IRS2|1.866;KL|3.059;LPAR3|2.868;CRHR2|2.007;ANKRD6|0.513;DUSP8|1.567;JAG1|1.703;MCC|2.125	20	2462	76	21829	http://www.ebi.ac.uk/QuickGO/GTerm?id=GO:0010646	[]
8	6,7,8	positive regulation of MAPK cascade	GO:0043410	0.000237	0.0107	2.47	1	6.85695	-11.527	CAV2|0.417;CDH2|1.906;MST1R|1.705;JUN|2.208;KL|3.059;LPAR3|2.868;ANKRD6|0.513	7	355	76	21829	http://www.ebi.ac.uk/QuickGO/GTerm?id=GO:0043410	[]
6	5,6	regulation of cellular ketone metabolic process	GO:0010565	0.000254	0.0112	0.12	-0.08	6.85695	-11.527	PPARGC1A|0.564;SIK1|1.694;IRS2|1.866;PDK4|0.421	4	88	76	21829	http://www.ebi.ac.uk/QuickGO/GTerm?id=GO:0010565	[]
5	4,5	regulation of signal transduction	GO:0009966	0.000308	0.0132	6.32	2.79	6.85695	-11.527	CAV2|0.417;CDH2|1.906;MST1R|1.705;CHAC1|0.521;EVC|0.468;CYR61|2.231;EGR1|2.376;JUN|2.208;IGFBP1|0.446;KIAA1324|5.521;CHRDL1|0.429;KL|3.059;LPAR3|2.868;CRHR2|2.007;ANKRD6|0.513;DUSP8|1.567;JAG1|1.703;MCC|2.125	18	2135	76	21829	http://www.ebi.ac.uk/QuickGO/GTerm?id=GO:0009966	[]
8	6,7,8	negative regulation of canonical Wnt signaling pathway	GO:0090090	0.00034	0.0139	1.27	0.45	6.85695	-11.527	CDH2|1.906;EGR1|2.376;ANKRD6|0.513;MCC|2.125	4	95	76	21829	http://www.ebi.ac.uk/QuickGO/GTerm?id=GO:0090090	[]
5	4,5	animal organ development	GO:0048513	0.00034	0.0139	6.54	2.89	6.85695	-11.527	CAV2|0.417;ADAMTS1|1.877;CDH2|1.906;PROM1|0.467;SLC25A25|0.627;EVC|0.468;CYR61|2.231;EGR1|2.376;PPARGC1A|0.564;RARA|1.526;SDK2|2.638;FOS|3.316;SIK1|1.694;CCK1R|5.905;CHRDL1|0.429;IRS2|1.866;KL|3.059;ANKRD6|0.513;JAG1|1.703	19	2348	76	21829	http://www.ebi.ac.uk/QuickGO/GTerm?id=GO:0048513	[]
4	4	regulation of cell growth	GO:0001558	0.000366	0.0147	-0.17	-0.22	6.85695	-11.527	CYR61|2.231;JUN|2.208;IGFBP1|0.446;WFDC1|0.417;SGK2|0.559;LPAR3|2.868	6	271	76	21829	http://www.ebi.ac.uk/QuickGO/GTerm?id=GO:0001558	[]
8	4,8	signal transduction by protein phosphorylation	GO:0023014	0.000383	0.015	3.01	1.25	6.85695	-11.527	CAV2|0.417;CDH2|1.906;MST1R|1.705;CYR61|2.231;JUN|2.208;KL|3.059;LPAR3|2.868;ANKRD6|0.513;DUSP8|1.567	9	642	76	21829	http://www.ebi.ac.uk/QuickGO/GTerm?id=GO:0023014	[]
6	6	cellular response to peptide hormone stimulus	GO:0071375	0.000394	0.0151	0.76	0.21	6.85695	-11.527	CAV2|0.417;IRS2|1.866;KL|3.059;CRHR2|2.007;PDK4|0.421	5	178	76	21829	http://www.ebi.ac.uk/QuickGO/GTerm?id=GO:0071375	[]
4	4	tissue development	GO:0009888	0.000401	0.0151	4.58	1.98	6.85695	-11.527	CAV2|0.417;ADAMTS9|0.583;CDH2|1.906;PROM1|0.467;SLC25A25|0.627;CYR61|2.231;EGR1|2.376;PPARGC1A|0.564;SDK2|2.638;FOS|3.316;SIK1|1.694;KL|3.059;ANKRD6|0.513;JAG1|1.703	14	1440	76	21829	http://www.ebi.ac.uk/QuickGO/GTerm?id=GO:0009888	[]
6	5,6	enzyme linked receptor protein signaling pathway	GO:0007167	0.000443	0.0163	3.71	1.58	6.85695	-11.527	CAV2|0.417;MST1R|1.705;CYR61|2.231;EGR1|2.376;FOS|3.316;IGFBP1|0.446;CHRDL1|0.429;IRS2|1.866;KL|3.059;PDK4|0.421	10	800	76	21829	http://www.ebi.ac.uk/QuickGO/GTerm?id=GO:0007167	[]
5	5	lipid modification	GO:0030258	0.000482	0.0174	-1.36	-0.77	6.85695	-11.527	PPARGC1A|0.564;IRS2|1.866;Gga.6352|0.616;PDK4|0.421;HAO2|0.556	5	186	76	21829	http://www.ebi.ac.uk/QuickGO/GTerm?id=GO:0030258	[]
6	6	cellular response to peptide	GO:1901653	0.000494	0.0175	0.76	0.21	6.85695	-11.527	CAV2|0.417;IRS2|1.866;KL|3.059;CRHR2|2.007;PDK4|0.421	5	187	76	21829	http://www.ebi.ac.uk/QuickGO/GTerm?id=GO:1901653	[]
3	3	positive regulation of signaling	GO:0023056	0.000504	0.0175	3.95	1.69	6.85695	-11.527	CAV2|0.417;CDH2|1.906;MST1R|1.705;EVC|0.468;CYR61|2.231;JUN|2.208;IRS2|1.866;KL|3.059;LPAR3|2.868;CRHR2|2.007;ANKRD6|0.513;JAG1|1.703	12	1130	76	21829	http://www.ebi.ac.uk/QuickGO/GTerm?id=GO:0023056	[]
6	6	regulation of fatty acid metabolic process	GO:0019217	0.000518	0.0176	-0.27	-0.27	6.85695	-11.527	PPARGC1A|0.564;IRS2|1.866;PDK4|0.421	3	45	76	21829	http://www.ebi.ac.uk/QuickGO/GTerm?id=GO:0019217	[]
7	5,6,7	positive regulation of phosphorus metabolic process	GO:0010562	0.000542	0.0178	3.28	1.38	6.85695	-11.527	CAV2|0.417;CDH2|1.906;ACSL1|0.614;MST1R|1.705;CYR61|2.231;JUN|2.208;PPARGC1A|0.564;KL|3.059;LPAR3|2.868;ANKRD6|0.513	10	821	76	21829	http://www.ebi.ac.uk/QuickGO/GTerm?id=GO:0010562	[]
6	6	positive regulation of phosphate metabolic process	GO:0045937	0.000542	0.0178	3.28	1.38	6.85695	-11.527	CAV2|0.417;CDH2|1.906;ACSL1|0.614;MST1R|1.705;CYR61|2.231;JUN|2.208;PPARGC1A|0.564;KL|3.059;LPAR3|2.868;ANKRD6|0.513	10	821	76	21829	http://www.ebi.ac.uk/QuickGO/GTerm?id=GO:0045937	[]
8	7,8	positive regulation of protein phosphorylation	GO:0001934	0.00058	0.0187	3.03	1.26	6.85695	-11.527	CAV2|0.417;CDH2|1.906;ACSL1|0.614;MST1R|1.705;CYR61|2.231;JUN|2.208;KL|3.059;LPAR3|2.868;ANKRD6|0.513	9	680	76	21829	http://www.ebi.ac.uk/QuickGO/GTerm?id=GO:0001934	[]
6	5,6	regulation of phosphorus metabolic process	GO:0051174	0.00064	0.0201	4.12	1.77	6.85695	-11.527	CAV2|0.417;CDH2|1.906;ACSL1|0.614;MST1R|1.705;CYR61|2.231;JUN|2.208;PPARGC1A|0.564;IRS2|1.866;KL|3.059;LPAR3|2.868;ANKRD6|0.513;DUSP8|1.567;PDK4|0.421	13	1332	76	21829	http://www.ebi.ac.uk/QuickGO/GTerm?id=GO:0051174	[]
9	6,7,8,9	positive regulation of fatty acid oxidation	GO:0046321	0.000645	0.0201	-0.02	-0.15	6.85695	-11.527	PPARGC1A|0.564;IRS2|1.866	2	11	76	21829	http://www.ebi.ac.uk/QuickGO/GTerm?id=GO:0046321	[]
4	4	response to organic substance	GO:0010033	0.000725	0.0222	6.3	2.78	6.85695	-11.527	CAV2|0.417;ACSL1|0.614;CYR61|2.231;EGR1|2.376;JUN|2.208;RARA|1.526;FOS|3.316;CCK1R|5.905;BCO1|0.596;CHRDL1|0.429;IRS2|1.866;KL|3.059;CRHR2|2.007;TRPA1|0.123;JAG1|1.703;PDK4|0.421	16	1901	76	21829	http://www.ebi.ac.uk/QuickGO/GTerm?id=GO:0010033	[]
3	3	single-organism developmental process	GO:0044767	0.000756	0.0226	9.01	4.04	6.85695	-11.527	LRFN5|1.736;CAV2|0.417;ADAMTS1|1.877;ADAMTS9|0.583;CDH2|1.906;PROM1|0.467;SLC25A25|0.627;GFRA3|0.646;CHAC1|0.521;ENPP2|0.6;EVC|0.468;CYR61|2.231;EGR1|2.376;JUN|2.208;PPARGC1A|0.564;RARA|1.526;SDK2|2.638;FOS|3.316;SIK1|1.694;CCK1R|5.905;CHRDL1|0.429;IRS2|1.866;KL|3.059;LPAR3|2.868;CRHR2|2.007;SLC5A3|1.572;ANKRD6|0.513;JAG1|1.703	28	4483	76	21829	http://www.ebi.ac.uk/QuickGO/GTerm?id=GO:0044767	[]
3	3	anatomical structure development	GO:0048856	0.000769	0.0226	8.67	3.88	6.85695	-11.527	LRFN5|1.736;CAV2|0.417;ADAMTS1|1.877;ADAMTS9|0.583;CDH2|1.906;PROM1|0.467;SLC25A25|0.627;GFRA3|0.646;CHAC1|0.521;ENPP2|0.6;EVC|0.468;CYR61|2.231;EGR1|2.376;PPARGC1A|0.564;RARA|1.526;SDK2|2.638;FOS|3.316;SIK1|1.694;CCK1R|5.905;CHRDL1|0.429;IRS2|1.866;KL|3.059;LPAR3|2.868;CRHR2|2.007;SLC5A3|1.572;ANKRD6|0.513;JAG1|1.703	27	4255	76	21829	http://www.ebi.ac.uk/QuickGO/GTerm?id=GO:0048856	[]
5	5	regulation of lipid metabolic process	GO:0019216	0.000782	0.0226	0.62	0.15	6.85695	-11.527	CYR61|2.231;PPARGC1A|0.564;SIK1|1.694;IRS2|1.866;PDK4|0.421	5	207	76	21829	http://www.ebi.ac.uk/QuickGO/GTerm?id=GO:0019216	[]
8	7,8	positive regulation of phosphorylation	GO:0042327	0.000789	0.0226	3.03	1.26	6.85695	-11.527	CAV2|0.417;CDH2|1.906;ACSL1|0.614;MST1R|1.705;CYR61|2.231;JUN|2.208;KL|3.059;LPAR3|2.868;ANKRD6|0.513	9	710	76	21829	http://www.ebi.ac.uk/QuickGO/GTerm?id=GO:0042327	[]
6	4,5,6	negative regulation of signal transduction	GO:0009968	0.00081	0.0228	3.54	1.5	6.85695	-11.527	CAV2|0.417;CDH2|1.906;CHAC1|0.521;EGR1|2.376;KIAA1324|5.521;CHRDL1|0.429;CRHR2|2.007;ANKRD6|0.513;DUSP8|1.567;MCC|2.125	10	865	76	21829	http://www.ebi.ac.uk/QuickGO/GTerm?id=GO:0009968	[]
6	4,5,6	positive regulation of signal transduction	GO:0009967	0.000828	0.0229	3.68	1.56	6.85695	-11.527	CAV2|0.417;CDH2|1.906;MST1R|1.705;EVC|0.468;CYR61|2.231;JUN|2.208;KL|3.059;LPAR3|2.868;CRHR2|2.007;ANKRD6|0.513;JAG1|1.703	11	1028	76	21829	http://www.ebi.ac.uk/QuickGO/GTerm?id=GO:0009967	[]
2	2	multicellular organismal process	GO:0032501	0.000839	0.0229	10.51	4.73	6.85695	-11.527	LRFN5|1.736;CAV2|0.417;ADAMTS1|1.877;ADAMTS9|0.583;CDH2|1.906;PROM1|0.467;SLC25A25|0.627;GFRA3|0.646;CHAC1|0.521;ENPP2|0.6;EVC|0.468;CYR61|2.231;EGR1|2.376;PPARGC1A|0.564;RARA|1.526;SDK2|2.638;FOS|3.316;SIK1|1.694;CCK1R|5.905;CHRDL1|0.429;IRS2|1.866;KL|3.059;AGPAT2|1.693;LPAR3|2.868;CRHR2|2.007;SLC5A3|1.572;TRPA1|0.123;ANKRD6|0.513;JAG1|1.703;MCC|2.125;PDK4|0.421	31	5228	76	21829	http://www.ebi.ac.uk/QuickGO/GTerm?id=GO:0032501	[]
7	7	cellular response to insulin stimulus	GO:0032869	0.000873	0.0235	0	-0.14	6.85695	-11.527	CAV2|0.417;IRS2|1.866;KL|3.059;PDK4|0.421	4	122	76	21829	http://www.ebi.ac.uk/QuickGO/GTerm?id=GO:0032869	[]
6	4,6	response to dietary excess	GO:0002021	0.00091	0.0238	-0.45	-0.35	6.85695	-11.527	SLC25A25|0.627;PPARGC1A|0.564	2	13	76	21829	http://www.ebi.ac.uk/QuickGO/GTerm?id=GO:0002021	[]
3	3	response to activity	GO:0014823	0.00091	0.0238	-0.45	-0.35	6.85695	-11.527	SLC25A25|0.627;PPARGC1A|0.564	2	13	76	21829	http://www.ebi.ac.uk/QuickGO/GTerm?id=GO:0014823	[]
2	2	developmental process	GO:0032502	0.000927	0.0239	9.01	4.04	6.85695	-11.527	LRFN5|1.736;CAV2|0.417;ADAMTS1|1.877;ADAMTS9|0.583;CDH2|1.906;PROM1|0.467;SLC25A25|0.627;GFRA3|0.646;CHAC1|0.521;ENPP2|0.6;EVC|0.468;CYR61|2.231;EGR1|2.376;JUN|2.208;PPARGC1A|0.564;RARA|1.526;SDK2|2.638;FOS|3.316;SIK1|1.694;CCK1R|5.905;CHRDL1|0.429;IRS2|1.866;KL|3.059;LPAR3|2.868;CRHR2|2.007;SLC5A3|1.572;ANKRD6|0.513;JAG1|1.703	28	4539	76	21829	http://www.ebi.ac.uk/QuickGO/GTerm?id=GO:0032502	[]
2	2	response to stimulus	GO:0050896	0.000999	0.0248	-14.64	-6.93	6.85695	-11.527	NIM1K|1.617;CAV2|0.417;CDH2|1.906;SOD3|0.184;SLC25A25|0.627;CRCP|0.599;ACSL1|0.614;MST1R|1.705;GFRA3|0.646;CHAC1|0.521;ENPP2|0.6;EVC|0.468;CYR61|2.231;EGR1|2.376;JUN|2.208;PPARGC1A|0.564;TOP2A|0.53;RARA|1.526;FOS|3.316;IGFBP1|0.446;WFDC1|0.417;GPX2|7.618;SIK1|1.694;CCK1R|5.905;BCO1|0.596;KIAA1324|5.521;CHRDL1|0.429;SGK2|0.559;IRS2|1.866;KL|3.059;LPAR3|2.868;SLC6A14|0.423;CRHR2|2.007;TRPA1|0.123;A…	40	7579	76	21829	http://www.ebi.ac.uk/QuickGO/GTerm?id=GO:0050896	[]
6	6	phosphorylation	GO:0016310	0.00102	0.0248	5.31	2.32	6.85695	-11.527	NIM1K|1.617;CAV2|0.417;CDH2|1.906;ACSL1|0.614;MST1R|1.705;CYR61|2.231;PANK1|0.639;JUN|2.208;HKDC1|2.366;SIK1|1.694;SGK2|0.559;IRS2|1.866;KL|3.059;LPAR3|2.868;COX7C|0.658;ANKRD6|0.513;DUSP8|1.567;PDK4|0.421	18	2360	76	21829	http://www.ebi.ac.uk/QuickGO/GTerm?id=GO:0016310	[]
3	3	negative regulation of response to stimulus	GO:0048585	0.00103	0.0248	1.7	0.65	6.85695	-11.527	CAV2|0.417;CDH2|1.906;CHAC1|0.521;EGR1|2.376;WFDC1|0.417;KIAA1324|5.521;CHRDL1|0.429;CRHR2|2.007;ANKRD6|0.513;DUSP8|1.567;MCC|2.125	11	1056	76	21829	http://www.ebi.ac.uk/QuickGO/GTerm?id=GO:0048585	[]
7	5,6,7	negative regulation of Wnt signaling pathway	GO:0030178	0.00104	0.0248	1.27	0.45	6.85695	-11.527	CDH2|1.906;EGR1|2.376;ANKRD6|0.513;MCC|2.125	4	128	76	21829	http://www.ebi.ac.uk/QuickGO/GTerm?id=GO:0030178	[]
7	7	glomerular visceral epithelial cell differentiation	GO:0072112	0.00106	0.0248	0.1	-0.1	6.85695	-11.527	PROM1|0.467;JAG1|1.703	2	14	76	21829	http://www.ebi.ac.uk/QuickGO/GTerm?id=GO:0072112	[]
6	6	renal filtration cell differentiation	GO:0061318	0.00106	0.0248	0.1	-0.1	6.85695	-11.527	PROM1|0.467;JAG1|1.703	2	14	76	21829	http://www.ebi.ac.uk/QuickGO/GTerm?id=GO:0061318	[]
7	6,7	glomerular epithelial cell differentiation	GO:0072311	0.00106	0.0248	0.1	-0.1	6.85695	-11.527	PROM1|0.467;JAG1|1.703	2	14	76	21829	http://www.ebi.ac.uk/QuickGO/GTerm?id=GO:0072311	[]
5	5	small molecule catabolic process	GO:0044282	0.00118	0.0273	-0.53	-0.39	6.85695	-11.527	ENPP2|0.6;ECI2|0.596;PIPOX|1.809;IRS2|1.866;Gga.6352|0.616	5	227	76	21829	http://www.ebi.ac.uk/QuickGO/GTerm?id=GO:0044282	[]
6	5,6	glomerular epithelium development	GO:0072010	0.00122	0.0279	0.1	-0.1	6.85695	-11.527	PROM1|0.467;JAG1|1.703	2	15	76	21829	http://www.ebi.ac.uk/QuickGO/GTerm?id=GO:0072010	[]
4	4	response to extracellular stimulus	GO:0009991	0.00125	0.0282	-0.74	-0.48	6.85695	-11.527	SLC25A25|0.627;PPARGC1A|0.564;FOS|3.316;KIAA1324|5.521;CRHR2|2.007;PDK4|0.421	6	343	76	21829	http://www.ebi.ac.uk/QuickGO/GTerm?id=GO:0009991	[]
3	3	regulation of multicellular organismal process	GO:0051239	0.0013	0.0288	5.08	2.21	6.85695	-11.527	ADAMTS9|0.583;CDH2|1.906;PROM1|0.467;ENPP2|0.6;CYR61|2.231;PPARGC1A|0.564;FOS|3.316;KL|3.059;AGPAT2|1.693;LPAR3|2.868;CRHR2|2.007;SLC5A3|1.572;ANKRD6|0.513;JAG1|1.703;MCC|2.125;PDK4|0.421	16	2007	76	21829	http://www.ebi.ac.uk/QuickGO/GTerm?id=GO:0051239	[]
6	6	fatty acid catabolic process	GO:0009062	0.00132	0.0291	-0.27	-0.27	6.85695	-11.527	ECI2|0.596;IRS2|1.866;Gga.6352|0.616	3	62	76	21829	http://www.ebi.ac.uk/QuickGO/GTerm?id=GO:0009062	[]
4	4	cellular ketone metabolic process	GO:0042180	0.00138	0.0294	0.12	-0.08	6.85695	-11.527	PPARGC1A|0.564;SIK1|1.694;IRS2|1.866;PDK4|0.421	4	138	76	21829	http://www.ebi.ac.uk/QuickGO/GTerm?id=GO:0042180	[]
4	3,4	cell growth	GO:0016049	0.00139	0.0294	-0.17	-0.22	6.85695	-11.527	CYR61|2.231;JUN|2.208;IGFBP1|0.446;WFDC1|0.417;SGK2|0.559;LPAR3|2.868	6	350	76	21829	http://www.ebi.ac.uk/QuickGO/GTerm?id=GO:0016049	[]
4	4	phosphorus metabolic process	GO:0006793	0.0014	0.0294	6.47	2.86	6.85695	-11.527	NIM1K|1.617;CAV2|0.417;CDH2|1.906;SLC25A25|0.627;ACSL1|0.614;MST1R|1.705;ENPP2|0.6;CYR61|2.231;PANK1|0.639;JUN|2.208;PPARGC1A|0.564;HKDC1|2.366;SIK1|1.694;SGK2|0.559;PIPOX|1.809;IRS2|1.866;KL|3.059;AGPAT2|1.693;LPAR3|2.868;COX7C|0.658;ANKRD6|0.513;DUSP8|1.567;PDK4|0.421	23	3501	76	21829	http://www.ebi.ac.uk/QuickGO/GTerm?id=GO:0006793	[]
4	3,4	negative regulation of signaling	GO:0023057	0.0014	0.0294	3.54	1.5	6.85695	-11.527	CAV2|0.417;CDH2|1.906;CHAC1|0.521;EGR1|2.376;KIAA1324|5.521;CHRDL1|0.429;CRHR2|2.007;ANKRD6|0.513;DUSP8|1.567;MCC|2.125	10	930	76	21829	http://www.ebi.ac.uk/QuickGO/GTerm?id=GO:0023057	[]
4	4	negative regulation of cell communication	GO:0010648	0.00146	0.0302	3.54	1.5	6.85695	-11.527	CAV2|0.417;CDH2|1.906;CHAC1|0.521;EGR1|2.376;KIAA1324|5.521;CHRDL1|0.429;CRHR2|2.007;ANKRD6|0.513;DUSP8|1.567;MCC|2.125	10	935	76	21829	http://www.ebi.ac.uk/QuickGO/GTerm?id=GO:0010648	[]
5	5	lipid catabolic process	GO:0016042	0.00165	0.0339	-1.15	-0.68	6.85695	-11.527	ENPP2|0.6;ECI2|0.596;IRS2|1.866;Gga.6352|0.616;LIPI|0.594	5	245	76	21829	http://www.ebi.ac.uk/QuickGO/GTerm?id=GO:0016042	[]
3	3	response to external stimulus	GO:0009605	0.00169	0.0342	-2.37	-1.24	6.85695	-11.527	SLC25A25|0.627;MST1R|1.705;GFRA3|0.646;ENPP2|0.6;JUN|2.208;PPARGC1A|0.564;FOS|3.316;WFDC1|0.417;SIK1|1.694;KIAA1324|5.521;CRHR2|2.007;TRPA1|0.123;PDK4|0.421	13	1481	76	21829	http://www.ebi.ac.uk/QuickGO/GTerm?id=GO:0009605	[]
7	7	regulation of phosphorylation	GO:0042325	0.00171	0.0343	3.5	1.48	6.85695	-11.527	CAV2|0.417;CDH2|1.906;ACSL1|0.614;MST1R|1.705;CYR61|2.231;JUN|2.208;IRS2|1.866;KL|3.059;LPAR3|2.868;ANKRD6|0.513;DUSP8|1.567	11	1125	76	21829	http://www.ebi.ac.uk/QuickGO/GTerm?id=GO:0042325	[]
4	4	cellular response to chemical stimulus	GO:0070887	0.00181	0.0358	5.92	2.6	6.85695	-11.527	CAV2|0.417;SOD3|0.184;ACSL1|0.614;CYR61|2.231;EGR1|2.376;JUN|2.208;PPARGC1A|0.564;RARA|1.526;FOS|3.316;CCK1R|5.905;CHRDL1|0.429;IRS2|1.866;KL|3.059;CRHR2|2.007;PDK4|0.421	15	1874	76	21829	http://www.ebi.ac.uk/QuickGO/GTerm?id=GO:0070887	[]
8	6,7,8	regulation of glucose metabolic process	GO:0010906	0.00188	0.0368	0.38	0.03	6.85695	-11.527	SIK1|1.694;IRS2|1.866;PDK4|0.421	3	70	76	21829	http://www.ebi.ac.uk/QuickGO/GTerm?id=GO:0010906	[]
7	6,7	regulation of phosphate metabolic process	GO:0019220	0.00203	0.0393	3.74	1.59	6.85695	-11.527	CAV2|0.417;CDH2|1.906;ACSL1|0.614;MST1R|1.705;CYR61|2.231;JUN|2.208;PPARGC1A|0.564;IRS2|1.866;KL|3.059;LPAR3|2.868;ANKRD6|0.513;DUSP8|1.567	12	1328	76	21829	http://www.ebi.ac.uk/QuickGO/GTerm?id=GO:0019220	[]
5	5	cellular lipid catabolic process	GO:0044242	0.00206	0.0393	-0.93	-0.57	6.85695	-11.527	ENPP2|0.6;ECI2|0.596;IRS2|1.866;Gga.6352|0.616	4	154	76	21829	http://www.ebi.ac.uk/QuickGO/GTerm?id=GO:0044242	[]
7	5,6,7	positive regulation of intracellular signal transduction	GO:1902533	0.00207	0.0393	2.77	1.14	6.85695	-11.527	CAV2|0.417;CDH2|1.906;MST1R|1.705;JUN|2.208;KL|3.059;LPAR3|2.868;CRHR2|2.007;ANKRD6|0.513	8	660	76	21829	http://www.ebi.ac.uk/QuickGO/GTerm?id=GO:1902533	[]
6	4,5,6	positive regulation of ossification	GO:0045778	0.00212	0.0398	1.07	0.35	6.85695	-11.527	CYR61|2.231;KL|3.059;JAG1|1.703	3	73	76	21829	http://www.ebi.ac.uk/QuickGO/GTerm?id=GO:0045778	[]
6	5,6	cellular respiration	GO:0045333	0.00216	0.0402	-0.84	-0.53	6.85695	-11.527	SLC25A25|0.627;PPARGC1A|0.564;CS|1.611;COX7C|0.658	4	156	76	21829	http://www.ebi.ac.uk/QuickGO/GTerm?id=GO:0045333	[]
5	5	cellular response to organic substance	GO:0071310	0.00237	0.0437	4.94	2.15	6.85695	-11.527	CAV2|0.417;ACSL1|0.614;CYR61|2.231;EGR1|2.376;JUN|2.208;RARA|1.526;FOS|3.316;CCK1R|5.905;CHRDL1|0.429;IRS2|1.866;KL|3.059;CRHR2|2.007;PDK4|0.421	13	1539	76	21829	http://www.ebi.ac.uk/QuickGO/GTerm?id=GO:0071310	[]
6	5,6	positive regulation of fatty acid metabolic process	GO:0045923	0.00241	0.0439	-0.02	-0.15	6.85695	-11.527	PPARGC1A|0.564;IRS2|1.866	2	21	76	21829	http://www.ebi.ac.uk/QuickGO/GTerm?id=GO:0045923	[]
4	4	response to oxidative stress	GO:0006979	0.00244	0.044	-1.4	-0.79	6.85695	-11.527	SOD3|0.184;PPARGC1A|0.564;FOS|3.316;GPX2|7.618;TRPA1|0.123	5	268	76	21829	http://www.ebi.ac.uk/QuickGO/GTerm?id=GO:0006979	[]
8	6,7,8	regulation of canonical Wnt signaling pathway	GO:0060828	0.00253	0.0452	1.27	0.45	6.85695	-11.527	CDH2|1.906;EGR1|2.376;ANKRD6|0.513;MCC|2.125	4	163	76	21829	http://www.ebi.ac.uk/QuickGO/GTerm?id=GO:0060828	[]
3	3	regulation of response to stimulus	GO:0048583	0.00259	0.0455	6.7	2.97	6.85695	-11.527	CAV2|0.417;CDH2|1.906;MST1R|1.705;CHAC1|0.521;EVC|0.468;CYR61|2.231;EGR1|2.376;JUN|2.208;IGFBP1|0.446;WFDC1|0.417;KIAA1324|5.521;CHRDL1|0.429;KL|3.059;LPAR3|2.868;CRHR2|2.007;ANKRD6|0.513;DUSP8|1.567;JAG1|1.703;MCC|2.125	19	2776	76	21829	http://www.ebi.ac.uk/QuickGO/GTerm?id=GO:0048583	[]
5	5	neuronal stem cell population maintenance	GO:0097150	0.00264	0.0455	0.51	0.1	6.85695	-11.527	CDH2|1.906;JAG1|1.703	2	22	76	21829	http://www.ebi.ac.uk/QuickGO/GTerm?id=GO:0097150	[]
7	7	monocarboxylic acid catabolic process	GO:0072329	0.00265	0.0455	-0.27	-0.27	6.85695	-11.527	ECI2|0.596;IRS2|1.866;Gga.6352|0.616	3	79	76	21829	http://www.ebi.ac.uk/QuickGO/GTerm?id=GO:0072329	[]
7	6,7	positive regulation of protein modification process	GO:0031401	0.00268	0.0455	3.03	1.26	6.85695	-11.527	CAV2|0.417;CDH2|1.906;ACSL1|0.614;MST1R|1.705;CYR61|2.231;JUN|2.208;KL|3.059;LPAR3|2.868;ANKRD6|0.513	9	848	76	21829	http://www.ebi.ac.uk/QuickGO/GTerm?id=GO:0031401	[]
4	4	carbohydrate metabolic process	GO:0005975	0.0027	0.0455	2.54	1.04	6.85695	-11.527	SLC2A2|0.635;HKDC1|2.366;SIK1|1.694;CS|1.611;IRS2|1.866;KL|3.059;SLC5A3|1.572;LDHB|0.618;PDK4|0.421	9	849	76	21829	http://www.ebi.ac.uk/QuickGO/GTerm?id=GO:0005975	[]
8	8	neuroepithelial cell differentiation	GO:0060563	0.00275	0.0455	0.23	-0.03	6.85695	-11.527	ADAMTS9|0.583;CDH2|1.906;JAG1|1.703	3	80	76	21829	http://www.ebi.ac.uk/QuickGO/GTerm?id=GO:0060563	[]
6	4,5,6	positive regulation of lipid metabolic process	GO:0045834	0.00275	0.0455	0.25	-0.03	6.85695	-11.527	CYR61|2.231;PPARGC1A|0.564;IRS2|1.866	3	80	76	21829	http://www.ebi.ac.uk/QuickGO/GTerm?id=GO:0045834	[]
4	3,4	signal transduction	GO:0007165	0.00276	0.0455	10.9	4.91	6.85695	-11.527	NIM1K|1.617;CAV2|0.417;CDH2|1.906;CRCP|0.599;ACSL1|0.614;MST1R|1.705;CHAC1|0.521;EVC|0.468;CYR61|2.231;EGR1|2.376;JUN|2.208;RARA|1.526;FOS|3.316;IGFBP1|0.446;SIK1|1.694;CCK1R|5.905;KIAA1324|5.521;CHRDL1|0.429;SGK2|0.559;IRS2|1.866;KL|3.059;LPAR3|2.868;CRHR2|2.007;TRPA1|0.123;ANKRD6|0.513;EVC2|0.376;DUSP8|1.567;JAG1|1.703;MCC|2.125;PDK4|0.421	30	5353	76	21829	http://www.ebi.ac.uk/QuickGO/GTerm?id=GO:0007165	[]
5	5	phosphate-containing compound metabolic process	GO:0006796	0.00278	0.0455	6.21	2.74	6.85695	-11.527	NIM1K|1.617;CAV2|0.417;CDH2|1.906;SLC25A25|0.627;ACSL1|0.614;MST1R|1.705;ENPP2|0.6;CYR61|2.231;PANK1|0.639;JUN|2.208;PPARGC1A|0.564;HKDC1|2.366;SIK1|1.694;SGK2|0.559;IRS2|1.866;KL|3.059;AGPAT2|1.693;LPAR3|2.868;COX7C|0.658;ANKRD6|0.513;DUSP8|1.567;PDK4|0.421	22	3458	76	21829	http://www.ebi.ac.uk/QuickGO/GTerm?id=GO:0006796	[]
6	6	carboxylic acid catabolic process	GO:0046395	0.00282	0.0455	-0.09	-0.18	6.85695	-11.527	ECI2|0.596;PIPOX|1.809;IRS2|1.866;Gga.6352|0.616	4	168	76	21829	http://www.ebi.ac.uk/QuickGO/GTerm?id=GO:0046395	[]
5	5	organic acid catabolic process	GO:0016054	0.00282	0.0455	-0.09	-0.18	6.85695	-11.527	ECI2|0.596;PIPOX|1.809;IRS2|1.866;Gga.6352|0.616	4	168	76	21829	http://www.ebi.ac.uk/QuickGO/GTerm?id=GO:0016054	[]
3	3	positive regulation of response to stimulus	GO:0048584	0.00307	0.0469	4.42	1.91	6.85695	-11.527	CAV2|0.417;CDH2|1.906;MST1R|1.705;EVC|0.468;CYR61|2.231;JUN|2.208;KIAA1324|5.521;KL|3.059;LPAR3|2.868;CRHR2|2.007;ANKRD6|0.513;JAG1|1.703	12	1396	76	21829	http://www.ebi.ac.uk/QuickGO/GTerm?id=GO:0048584	[]
3	3	regulation of developmental process	GO:0050793	0.00312	0.0469	4.52	1.96	6.85695	-11.527	ADAMTS9|0.583;CDH2|1.906;PROM1|0.467;ENPP2|0.6;CYR61|2.231;JUN|2.208;PPARGC1A|0.564;FOS|3.316;SIK1|1.694;KL|3.059;LPAR3|2.868;CRHR2|2.007;ANKRD6|0.513;JAG1|1.703	14	1783	76	21829	http://www.ebi.ac.uk/QuickGO/GTerm?id=GO:0050793	[]
8	7,8	regulation of protein phosphorylation	GO:0001932	0.00321	0.0469	3.22	1.35	6.85695	-11.527	CAV2|0.417;CDH2|1.906;ACSL1|0.614;MST1R|1.705;CYR61|2.231;JUN|2.208;KL|3.059;LPAR3|2.868;ANKRD6|0.513;DUSP8|1.567	10	1042	76	21829	http://www.ebi.ac.uk/QuickGO/GTerm?id=GO:0001932	[]
3	3	positive regulation of developmental process	GO:0051094	0.00338	0.0469	3.2	1.34	6.85695	-11.527	ADAMTS9|0.583;PROM1|0.467;CYR61|2.231;JUN|2.208;PPARGC1A|0.564;FOS|3.316;KL|3.059;LPAR3|2.868;JAG1|1.703	9	878	76	21829	http://www.ebi.ac.uk/QuickGO/GTerm?id=GO:0051094	[]
5	5	lipid biosynthetic process	GO:0008610	0.0034	0.0469	0.24	-0.03	6.85695	-11.527	CERS6|0.346;ACSL1|0.614;CYR61|2.231;SIK1|1.694;AGPAT2|1.693;PDK4|0.421	6	419	76	21829	http://www.ebi.ac.uk/QuickGO/GTerm?id=GO:0008610	[]
7	7	anoikis	GO:0043276	0.00341	0.0469	0.15	-0.07	6.85695	-11.527	SIK1|1.694;PDK4|0.421	2	25	76	21829	http://www.ebi.ac.uk/QuickGO/GTerm?id=GO:0043276	[]
4	4	response to food	GO:0032094	0.00341	0.0469	-0.1	-0.19	6.85695	-11.527	SLC25A25|0.627;CRHR2|2.007	2	25	76	21829	http://www.ebi.ac.uk/QuickGO/GTerm?id=GO:0032094	[]
6	5,6	positive regulation of cellular protein metabolic process	GO:0032270	0.00344	0.0469	3.34	1.41	6.85695	-11.527	CAV2|0.417;CDH2|1.906;ACSL1|0.614;MST1R|1.705;CYR61|2.231;JUN|2.208;KL|3.059;RNF144A|2.045;LPAR3|2.868;ANKRD6|0.513	10	1052	76	21829	http://www.ebi.ac.uk/QuickGO/GTerm?id=GO:0032270	[]
2	2	growth	GO:0040007	0.00344	0.0469	-2.67	-1.38	6.85695	-11.527	SLC25A25|0.627;EVC|0.468;CYR61|2.231;JUN|2.208;IGFBP1|0.446;WFDC1|0.417;SGK2|0.559;LPAR3|2.868	8	717	76	21829	http://www.ebi.ac.uk/QuickGO/GTerm?id=GO:0040007	[]
5	5	ganglion structural organization	GO:0061555	0.00348	0.0469	0	-0.14	6.85695	-11.527	CDH2|1.906	1	1	76	21829	http://www.ebi.ac.uk/QuickGO/GTerm?id=GO:0061555	[]
7	7	gamma-tubulin complex localization	GO:0033566	0.00348	0.0469	0	-0.14	6.85695	-11.527	MZT1|0.461	1	1	76	21829	http://www.ebi.ac.uk/QuickGO/GTerm?id=GO:0033566	[]
6	6	regulation of postsynaptic membrane organization	GO:1901626	0.00348	0.0469	0	-0.14	6.85695	-11.527	CDH2|1.906	1	1	76	21829	http://www.ebi.ac.uk/QuickGO/GTerm?id=GO:1901626	[]
7	6,7	endocardial cushion cell development	GO:0061444	0.00348	0.0469	0	-0.14	6.85695	-11.527	JAG1|1.703	1	1	76	21829	http://www.ebi.ac.uk/QuickGO/GTerm?id=GO:0061444	[]
8	8	beta-carotene metabolic process	GO:1901810	0.00348	0.0469	0	-0.14	6.85695	-11.527	BCO1|0.596	1	1	76	21829	http://www.ebi.ac.uk/QuickGO/GTerm?id=GO:1901810	[]
6	6	negative regulation of triglyceride biosynthetic process	GO:0010868	0.00348	0.0469	0	-0.14	6.85695	-11.527	SIK1|1.694	1	1	76	21829	http://www.ebi.ac.uk/QuickGO/GTerm?id=GO:0010868	[]
9	8,9	L-lysine catabolic process to acetyl-CoA via L-pipecolate	GO:0033514	0.00348	0.0469	0	-0.14	6.85695	-11.527	PIPOX|1.809	1	1	76	21829	http://www.ebi.ac.uk/QuickGO/GTerm?id=GO:0033514	[]
8	7,8	myo-inositol transport	GO:0015798	0.00348	0.0469	0	-0.14	6.85695	-11.527	SLC5A3|1.572	1	1	76	21829	http://www.ebi.ac.uk/QuickGO/GTerm?id=GO:0015798	[]
6	6	cranial ganglion structural organization	GO:0061562	0.00348	0.0469	0	-0.14	6.85695	-11.527	CDH2|1.906	1	1	76	21829	http://www.ebi.ac.uk/QuickGO/GTerm?id=GO:0061562	[]
7	7	trigeminal ganglion structural organization	GO:0061563	0.00348	0.0469	0	-0.14	6.85695	-11.527	CDH2|1.906	1	1	76	21829	http://www.ebi.ac.uk/QuickGO/GTerm?id=GO:0061563	[]
8	7,8	L-lysine catabolic process to acetyl-CoA	GO:0019474	0.00348	0.0469	0	-0.14	6.85695	-11.527	PIPOX|1.809	1	1	76	21829	http://www.ebi.ac.uk/QuickGO/GTerm?id=GO:0019474	[]
7	6,7	regulation of postsynaptic density protein 95 clustering	GO:1902897	0.00348	0.0469	0	-0.14	6.85695	-11.527	CDH2|1.906	1	1	76	21829	http://www.ebi.ac.uk/QuickGO/GTerm?id=GO:1902897	[]
12	7,8,9,10,11,12	microtubule nucleation by spindle pole body	GO:0051417	0.00348	0.0469	0	-0.14	6.85695	-11.527	MZT1|0.461	1	1	76	21829	http://www.ebi.ac.uk/QuickGO/GTerm?id=GO:0051417	[]
4	4	heart valve morphogenesis	GO:0003179	0.00368	0.0492	0.58	0.13	6.85695	-11.527	CYR61|2.231;JAG1|1.703	2	26	76	21829	http://www.ebi.ac.uk/QuickGO/GTerm?id=GO:0003179	[]
7	6,7	transmembrane receptor protein serine/threonine kinase signaling pathway	GO:0007178	0.00379	0.0503	0.75	0.2	6.85695	-11.527	CAV2|0.417;CYR61|2.231;EGR1|2.376;FOS|3.316;CHRDL1|0.429	5	297	76	21829	http://www.ebi.ac.uk/QuickGO/GTerm?id=GO:0007178	[]
4	4	glycosyl compound metabolic process	GO:1901657	0.00384	0.0506	-0.86	-0.54	6.85695	-11.527	SLC25A25|0.627;PANK1|0.639;PPARGC1A|0.564;HKDC1|2.366;KL|3.059	5	298	76	21829	http://www.ebi.ac.uk/QuickGO/GTerm?id=GO:1901657	[]
5	5	cellular response to organonitrogen compound	GO:0071417	0.00395	0.0515	0.76	0.21	6.85695	-11.527	CAV2|0.417;IRS2|1.866;KL|3.059;CRHR2|2.007;PDK4|0.421	5	300	76	21829	http://www.ebi.ac.uk/QuickGO/GTerm?id=GO:0071417	[]
7	6,7	acetyl-CoA metabolic process	GO:0006084	0.00397	0.0515	0.12	-0.09	6.85695	-11.527	PIPOX|1.809;PDK4|0.421	2	27	76	21829	http://www.ebi.ac.uk/QuickGO/GTerm?id=GO:0006084	[]
3	3	single organism signaling	GO:0044700	0.0041	0.0528	11.21	5.06	6.85695	-11.527	RIC3|0.491;NIM1K|1.617;CAV2|0.417;CDH2|1.906;CRCP|0.599;ACSL1|0.614;MST1R|1.705;CHAC1|0.521;EVC|0.468;CYR61|2.231;EGR1|2.376;JUN|2.208;RARA|1.526;FOS|3.316;IGFBP1|0.446;SIK1|1.694;CCK1R|5.905;KIAA1324|5.521;CHRDL1|0.429;SGK2|0.559;IRS2|1.866;KL|3.059;LPAR3|2.868;CRHR2|2.007;TRPA1|0.123;ANKRD6|0.513;EVC2|0.376;DUSP8|1.567;JAG1|1.703;MCC|2.125;PDK4|0.421	31	5739	76	21829	http://www.ebi.ac.uk/QuickGO/GTerm?id=GO:0044700	[]
6	5,6	regulation of lipid biosynthetic process	GO:0046890	0.0042	0.0538	0.38	0.03	6.85695	-11.527	CYR61|2.231;SIK1|1.694;PDK4|0.421	3	93	76	21829	http://www.ebi.ac.uk/QuickGO/GTerm?id=GO:0046890	[]
5	5	cellular response to oxygen-containing compound	GO:1901701	0.00428	0.0544	1.49	0.55	6.85695	-11.527	CAV2|0.417;SOD3|0.184;FOS|3.316;IRS2|1.866;KL|3.059;CRHR2|2.007;PDK4|0.421	7	586	76	21829	http://www.ebi.ac.uk/QuickGO/GTerm?id=GO:1901701	[]
FALSE	obselete	obsolete death	GO:0016265	0.00436	0.0546	-0.53	-0.39	6.85695	-11.527	CHAC1|0.521;CYR61|2.231;EGR1|2.376;PPARGC1A|0.564;TOP2A|0.53;SIK1|1.694;KIAA1324|5.521;SGK2|0.559;IRS2|1.866;PDK4|0.421	10	1088	76	21829	http://www.ebi.ac.uk/QuickGO/GTerm?id=GO:0016265	[]
2	2	signaling	GO:0023052	0.00436	0.0546	11.21	5.06	6.85695	-11.527	RIC3|0.491;NIM1K|1.617;CAV2|0.417;CDH2|1.906;CRCP|0.599;ACSL1|0.614;MST1R|1.705;CHAC1|0.521;EVC|0.468;CYR61|2.231;EGR1|2.376;JUN|2.208;RARA|1.526;FOS|3.316;IGFBP1|0.446;SIK1|1.694;CCK1R|5.905;KIAA1324|5.521;CHRDL1|0.429;SGK2|0.559;IRS2|1.866;KL|3.059;LPAR3|2.868;CRHR2|2.007;TRPA1|0.123;ANKRD6|0.513;EVC2|0.376;DUSP8|1.567;JAG1|1.703;MCC|2.125;PDK4|0.421	31	5761	76	21829	http://www.ebi.ac.uk/QuickGO/GTerm?id=GO:0023052	[]
8	8	chromosome condensation	GO:0030261	0.00457	0.0561	-0.58	-0.41	6.85695	-11.527	TOP2A|0.53;SMC2|0.493	2	29	76	21829	http://www.ebi.ac.uk/QuickGO/GTerm?id=GO:0030261	[]
4	4	heart valve development	GO:0003170	0.00457	0.0561	0.58	0.13	6.85695	-11.527	CYR61|2.231;JAG1|1.703	2	29	76	21829	http://www.ebi.ac.uk/QuickGO/GTerm?id=GO:0003170	[]
6	5,6	adipose tissue development	GO:0060612	0.00457	0.0561	-0.45	-0.35	6.85695	-11.527	SLC25A25|0.627;PPARGC1A|0.564	2	29	76	21829	http://www.ebi.ac.uk/QuickGO/GTerm?id=GO:0060612	[]
6	5,6	regulation of cellular carbohydrate metabolic process	GO:0010675	0.00473	0.0576	0.38	0.03	6.85695	-11.527	SIK1|1.694;IRS2|1.866;PDK4|0.421	3	97	76	21829	http://www.ebi.ac.uk/QuickGO/GTerm?id=GO:0010675	[]
3	3	regulation of growth	GO:0040008	0.00492	0.0595	-0.17	-0.22	6.85695	-11.527	CYR61|2.231;JUN|2.208;IGFBP1|0.446;WFDC1|0.417;SGK2|0.559;LPAR3|2.868	6	452	76	21829	http://www.ebi.ac.uk/QuickGO/GTerm?id=GO:0040008	[]
5	5	regulation of epithelial cell differentiation	GO:0030856	0.00515	0.0618	-0.23	-0.25	6.85695	-11.527	ADAMTS9|0.583;PROM1|0.467;JAG1|1.703	3	100	76	21829	http://www.ebi.ac.uk/QuickGO/GTerm?id=GO:0030856	[]
6	5,6	membrane assembly	GO:0071709	0.00521	0.0618	0.1	-0.1	6.85695	-11.527	CAV2|0.417;CDH2|1.906	2	31	76	21829	http://www.ebi.ac.uk/QuickGO/GTerm?id=GO:0071709	[]
7	6,7	epithelial cell differentiation involved in kidney development	GO:0035850	0.00521	0.0618	0.1	-0.1	6.85695	-11.527	PROM1|0.467;JAG1|1.703	2	31	76	21829	http://www.ebi.ac.uk/QuickGO/GTerm?id=GO:0035850	[]
5	5	positive regulation of protein metabolic process	GO:0051247	0.00537	0.0633	3.34	1.41	6.85695	-11.527	CAV2|0.417;CDH2|1.906;ACSL1|0.614;MST1R|1.705;CYR61|2.231;JUN|2.208;KL|3.059;RNF144A|2.045;LPAR3|2.868;ANKRD6|0.513	10	1121	76	21829	http://www.ebi.ac.uk/QuickGO/GTerm?id=GO:0051247	[]
2	2	rhythmic process	GO:0048511	0.00553	0.0643	0.02	-0.13	6.85695	-11.527	ADAMTS1|1.877;PPARGC1A|0.564;TOP2A|0.53;SIK1|1.694	4	203	76	21829	http://www.ebi.ac.uk/QuickGO/GTerm?id=GO:0048511	[]
4	4	membrane biogenesis	GO:0044091	0.00555	0.0643	0.1	-0.1	6.85695	-11.527	CAV2|0.417;CDH2|1.906	2	32	76	21829	http://www.ebi.ac.uk/QuickGO/GTerm?id=GO:0044091	[]
4	4	regulation of multicellular organismal development	GO:2000026	0.00559	0.0643	3.7	1.58	6.85695	-11.527	ADAMTS9|0.583;CDH2|1.906;PROM1|0.467;ENPP2|0.6;CYR61|2.231;FOS|3.316;KL|3.059;LPAR3|2.868;CRHR2|2.007;ANKRD6|0.513;JAG1|1.703	11	1313	76	21829	http://www.ebi.ac.uk/QuickGO/GTerm?id=GO:2000026	[]
6	4,5,6	positive regulation of cellular metabolic process	GO:0031325	0.00568	0.0643	5.73	2.51	6.85695	-11.527	CAV2|0.417;CDH2|1.906;ACSL1|0.614;MST1R|1.705;CYR61|2.231;EGR1|2.376;JUN|2.208;PPARGC1A|0.564;FOS|3.316;KIAA1324|5.521;IRS2|1.866;KL|3.059;RNF144A|2.045;LPAR3|2.868;ANKRD6|0.513;JAG1|1.703	16	2324	76	21829	http://www.ebi.ac.uk/QuickGO/GTerm?id=GO:0031325	[]
5	5	eye development	GO:0001654	0.00568	0.0643	-0.65	-0.44	6.85695	-11.527	PROM1|0.467;SLC25A25|0.627;SDK2|2.638;CHRDL1|0.429;JAG1|1.703	5	327	76	21829	http://www.ebi.ac.uk/QuickGO/GTerm?id=GO:0001654	[]
7	7	protein phosphorylation	GO:0006468	0.00571	0.0643	4.29	1.85	6.85695	-11.527	NIM1K|1.617;CAV2|0.417;CDH2|1.906;ACSL1|0.614;MST1R|1.705;CYR61|2.231;JUN|2.208;SIK1|1.694;SGK2|0.559;KL|3.059;LPAR3|2.868;ANKRD6|0.513;DUSP8|1.567;PDK4|0.421	14	1908	76	21829	http://www.ebi.ac.uk/QuickGO/GTerm?id=GO:0006468	[]
6	6	homophilic cell adhesion via plasma membrane adhesion molecules	GO:0007156	0.00572	0.0643	-0.19	-0.23	6.85695	-11.527	CDH2|1.906;FAT1|0.605;SDK2|2.638;CDHR5|0.509	4	205	76	21829	http://www.ebi.ac.uk/QuickGO/GTerm?id=GO:0007156	[]
6	4,5,6	cardiac chamber morphogenesis	GO:0003206	0.00574	0.0643	0.85	0.25	6.85695	-11.527	ADAMTS1|1.877;CYR61|2.231;JAG1|1.703	3	104	76	21829	http://www.ebi.ac.uk/QuickGO/GTerm?id=GO:0003206	[]
6	6	cellular response to growth factor stimulus	GO:0071363	0.00581	0.0644	2.48	1.01	6.85695	-11.527	CAV2|0.417;CYR61|2.231;EGR1|2.376;FOS|3.316;CHRDL1|0.429;KL|3.059	6	468	76	21829	http://www.ebi.ac.uk/QuickGO/GTerm?id=GO:0071363	[]
5	5	response to nutrient levels	GO:0031667	0.00582	0.0644	-1.04	-0.63	6.85695	-11.527	SLC25A25|0.627;PPARGC1A|0.564;KIAA1324|5.521;CRHR2|2.007;PDK4|0.421	5	329	76	21829	http://www.ebi.ac.uk/QuickGO/GTerm?id=GO:0031667	[]
7	7	ceramide biosynthetic process	GO:0046513	0.00589	0.0645	0.11	-0.09	6.85695	-11.527	CERS6|0.346;CYR61|2.231	2	33	76	21829	http://www.ebi.ac.uk/QuickGO/GTerm?id=GO:0046513	[]
5	5	muscle tissue development	GO:0060537	0.0059	0.0645	0.63	0.15	6.85695	-11.527	CAV2|0.417;EGR1|2.376;PPARGC1A|0.564;FOS|3.316;SIK1|1.694	5	330	76	21829	http://www.ebi.ac.uk/QuickGO/GTerm?id=GO:0060537	[]
4	4	response to mechanical stimulus	GO:0009612	0.00605	0.0658	0.91	0.28	6.85695	-11.527	JUN|2.208;FOS|3.316;TRPA1|0.123	3	106	76	21829	http://www.ebi.ac.uk/QuickGO/GTerm?id=GO:0009612	[]
5	4,5	positive regulation of cell differentiation	GO:0045597	0.00616	0.0663	2.47	1	6.85695	-11.527	ADAMTS9|0.583;PROM1|0.467;CYR61|2.231;JUN|2.208;FOS|3.316;LPAR3|2.868;JAG1|1.703	7	627	76	21829	http://www.ebi.ac.uk/QuickGO/GTerm?id=GO:0045597	[]
5	5	regulation of carbohydrate metabolic process	GO:0006109	0.00621	0.0663	0.38	0.03	6.85695	-11.527	SIK1|1.694;IRS2|1.866;PDK4|0.421	3	107	76	21829	http://www.ebi.ac.uk/QuickGO/GTerm?id=GO:0006109	[]
4	4	animal organ morphogenesis	GO:0009887	0.00622	0.0663	2.5	1.02	6.85695	-11.527	ADAMTS1|1.877;CDH2|1.906;PROM1|0.467;EVC|0.468;CYR61|2.231;SDK2|2.638;ANKRD6|0.513;JAG1|1.703	8	792	76	21829	http://www.ebi.ac.uk/QuickGO/GTerm?id=GO:0009887	[]
5	5	response to growth factor	GO:0070848	0.00636	0.0663	2.48	1.01	6.85695	-11.527	CAV2|0.417;CYR61|2.231;EGR1|2.376;FOS|3.316;CHRDL1|0.429;KL|3.059	6	477	76	21829	http://www.ebi.ac.uk/QuickGO/GTerm?id=GO:0070848	[]
3	3	cell communication	GO:0007154	0.00644	0.0663	11.21	5.06	6.85695	-11.527	RIC3|0.491;NIM1K|1.617;CAV2|0.417;CDH2|1.906;CRCP|0.599;ACSL1|0.614;MST1R|1.705;CHAC1|0.521;EVC|0.468;CYR61|2.231;EGR1|2.376;JUN|2.208;RARA|1.526;FOS|3.316;IGFBP1|0.446;SIK1|1.694;CCK1R|5.905;KIAA1324|5.521;CHRDL1|0.429;SGK2|0.559;IRS2|1.866;KL|3.059;LPAR3|2.868;CRHR2|2.007;TRPA1|0.123;ANKRD6|0.513;EVC2|0.376;DUSP8|1.567;JAG1|1.703;MCC|2.125;PDK4|0.421	31	5904	76	21829	http://www.ebi.ac.uk/QuickGO/GTerm?id=GO:0007154	[]
5	5	nervous system development	GO:0007399	0.00685	0.0663	4.41	1.9	6.85695	-11.527	LRFN5|1.736;CDH2|1.906;GFRA3|0.646;CHAC1|0.521;RARA|1.526;SDK2|2.638;FOS|3.316;CCK1R|5.905;CHRDL1|0.429;IRS2|1.866;LPAR3|2.868;SLC5A3|1.572;JAG1|1.703	13	1744	76	21829	http://www.ebi.ac.uk/QuickGO/GTerm?id=GO:0007399	[]
8	7,8	glomerular parietal epithelial cell differentiation	GO:0072139	0.00695	0.0663	0	-0.14	6.85695	-11.527	PROM1|0.467	1	2	76	21829	http://www.ebi.ac.uk/QuickGO/GTerm?id=GO:0072139	[]
11	8,9,10,11	positive regulation of ATP biosynthetic process	GO:2001171	0.00695	0.0663	0	-0.14	6.85695	-11.527	PPARGC1A|0.564	1	2	76	21829	http://www.ebi.ac.uk/QuickGO/GTerm?id=GO:2001171	[]
8	8	lysine catabolic process	GO:0006554	0.00695	0.0663	0	-0.14	6.85695	-11.527	PIPOX|1.809	1	2	76	21829	http://www.ebi.ac.uk/QuickGO/GTerm?id=GO:0006554	[]
6	6	regulation of oligodendrocyte progenitor proliferation	GO:0070445	0.00695	0.0663	0	-0.14	6.85695	-11.527	CDH2|1.906	1	2	76	21829	http://www.ebi.ac.uk/QuickGO/GTerm?id=GO:0070445	[]
8	5,8	oligodendrocyte progenitor proliferation	GO:0070444	0.00695	0.0663	0	-0.14	6.85695	-11.527	CDH2|1.906	1	2	76	21829	http://www.ebi.ac.uk/QuickGO/GTerm?id=GO:0070444	[]
8	8	L-lysine metabolic process	GO:0046440	0.00695	0.0663	0	-0.14	6.85695	-11.527	PIPOX|1.809	1	2	76	21829	http://www.ebi.ac.uk/QuickGO/GTerm?id=GO:0046440	[]
9	9	L-lysine catabolic process	GO:0019477	0.00695	0.0663	0	-0.14	6.85695	-11.527	PIPOX|1.809	1	2	76	21829	http://www.ebi.ac.uk/QuickGO/GTerm?id=GO:0019477	[]
4	4	negative regulation of CREB transcription factor activity	GO:0032792	0.00695	0.0663	0	-0.14	6.85695	-11.527	SIK1|1.694	1	2	76	21829	http://www.ebi.ac.uk/QuickGO/GTerm?id=GO:0032792	[]
6	6	endocardial cushion cell differentiation	GO:0061443	0.00695	0.0663	0	-0.14	6.85695	-11.527	JAG1|1.703	1	2	76	21829	http://www.ebi.ac.uk/QuickGO/GTerm?id=GO:0061443	[]
7	7	cellular response to interleukin-8	GO:0098759	0.00695	0.0663	0	-0.14	6.85695	-11.527	EGR1|2.376	1	2	76	21829	http://www.ebi.ac.uk/QuickGO/GTerm?id=GO:0098759	[]
6	6	response to interleukin-8	GO:0098758	0.00695	0.0663	0	-0.14	6.85695	-11.527	EGR1|2.376	1	2	76	21829	http://www.ebi.ac.uk/QuickGO/GTerm?id=GO:0098758	[]
5	5	negative regulation of triglyceride metabolic process	GO:0090209	0.00695	0.0663	0	-0.14	6.85695	-11.527	SIK1|1.694	1	2	76	21829	http://www.ebi.ac.uk/QuickGO/GTerm?id=GO:0090209	[]
6	5,6	cholecystokinin signaling pathway	GO:0038188	0.00695	0.0663	0	-0.14	6.85695	-11.527	CCK1R|5.905	1	2	76	21829	http://www.ebi.ac.uk/QuickGO/GTerm?id=GO:0038188	[]
7	6,7	detection of chemical stimulus involved in sensory perception of pain	GO:0050968	0.00695	0.0663	0	-0.14	6.85695	-11.527	TRPA1|0.123	1	2	76	21829	http://www.ebi.ac.uk/QuickGO/GTerm?id=GO:0050968	[]
7	6,7	trigeminal ganglion morphogenesis	GO:0061556	0.00695	0.0663	0	-0.14	6.85695	-11.527	CDH2|1.906	1	2	76	21829	http://www.ebi.ac.uk/QuickGO/GTerm?id=GO:0061556	[]
6	6	trigeminal ganglion formation	GO:0061561	0.00695	0.0663	0	-0.14	6.85695	-11.527	CDH2|1.906	1	2	76	21829	http://www.ebi.ac.uk/QuickGO/GTerm?id=GO:0061561	[]
8	6,7,8	positive regulation of mitochondrial DNA metabolic process	GO:1901860	0.00695	0.0663	0	-0.14	6.85695	-11.527	PPARGC1A|0.564	1	2	76	21829	http://www.ebi.ac.uk/QuickGO/GTerm?id=GO:1901860	[]
8	8	pyruvate metabolic process	GO:0006090	0.00704	0.0666	-0.37	-0.32	6.85695	-11.527	HKDC1|2.366;LDHB|0.618;PDK4|0.421	3	112	76	21829	http://www.ebi.ac.uk/QuickGO/GTerm?id=GO:0006090	[]
3	3	positive regulation of cellular process	GO:0048522	0.00705	0.0666	8.06	3.59	6.85695	-11.527	CAV2|0.417;ADAMTS9|0.583;CDH2|1.906;PROM1|0.467;ACSL1|0.614;MST1R|1.705;EVC|0.468;CYR61|2.231;EGR1|2.376;JUN|2.208;PPARGC1A|0.564;TOP2A|0.53;FOS|3.316;KIAA1324|5.521;OSCP1|0.14;IRS2|1.866;KL|3.059;RNF144A|2.045;LPAR3|2.868;CRHR2|2.007;ANKRD6|0.513;JAG1|1.703	22	3729	76	21829	http://www.ebi.ac.uk/QuickGO/GTerm?id=GO:0048522	[]
5	5	connective tissue development	GO:0061448	0.00731	0.0687	-0.18	-0.22	6.85695	-11.527	CDH2|1.906;SLC25A25|0.627;CYR61|2.231;PPARGC1A|0.564	4	220	76	21829	http://www.ebi.ac.uk/QuickGO/GTerm?id=GO:0061448	[]
7	6,7	regulation of protein modification process	GO:0031399	0.00742	0.0694	3.6	1.53	6.85695	-11.527	CAV2|0.417;CDH2|1.906;ACSL1|0.614;MST1R|1.705;CYR61|2.231;EGR1|2.376;JUN|2.208;KL|3.059;LPAR3|2.868;ANKRD6|0.513;DUSP8|1.567	11	1365	76	21829	http://www.ebi.ac.uk/QuickGO/GTerm?id=GO:0031399	[]
5	5	cellular response to nitrogen compound	GO:1901699	0.00751	0.0699	0.76	0.21	6.85695	-11.527	CAV2|0.417;IRS2|1.866;KL|3.059;CRHR2|2.007;PDK4|0.421	5	350	76	21829	http://www.ebi.ac.uk/QuickGO/GTerm?id=GO:1901699	[]
3	3	anatomical structure morphogenesis	GO:0009653	0.00756	0.0699	4.87	2.12	6.85695	-11.527	LRFN5|1.736;ADAMTS1|1.877;CDH2|1.906;PROM1|0.467;GFRA3|0.646;ENPP2|0.6;EVC|0.468;CYR61|2.231;RARA|1.526;SDK2|2.638;CCK1R|5.905;LPAR3|2.868;CRHR2|2.007;ANKRD6|0.513;JAG1|1.703	15	2181	76	21829	http://www.ebi.ac.uk/QuickGO/GTerm?id=GO:0009653	[]
3	3	cellular response to stimulus	GO:0051716	0.00767	0.0706	12.16	5.5	6.85695	-11.527	NIM1K|1.617;CAV2|0.417;CDH2|1.906;SOD3|0.184;CRCP|0.599;ACSL1|0.614;MST1R|1.705;CHAC1|0.521;EVC|0.468;CYR61|2.231;EGR1|2.376;JUN|2.208;PPARGC1A|0.564;TOP2A|0.53;RARA|1.526;FOS|3.316;IGFBP1|0.446;SIK1|1.694;CCK1R|5.905;KIAA1324|5.521;CHRDL1|0.429;SGK2|0.559;IRS2|1.866;KL|3.059;LPAR3|2.868;CRHR2|2.007;TRPA1|0.123;ANKRD6|0.513;EVC2|0.376;DUSP8|1.567;JAG1|1.703;MCC|2.125;PDK4|0.421	33	6488	76	21829	http://www.ebi.ac.uk/QuickGO/GTerm?id=GO:0051716	[]
7	7	purine ribonucleoside metabolic process	GO:0046128	0.0079	0.0724	-1.02	-0.61	6.85695	-11.527	SLC25A25|0.627;PANK1|0.639;PPARGC1A|0.564;HKDC1|2.366	4	225	76	21829	http://www.ebi.ac.uk/QuickGO/GTerm?id=GO:0046128	[]
7	7	camera-type eye morphogenesis	GO:0048593	0.00813	0.0735	0.33	0.01	6.85695	-11.527	PROM1|0.467;SDK2|2.638;JAG1|1.703	3	118	76	21829	http://www.ebi.ac.uk/QuickGO/GTerm?id=GO:0048593	[]
9	8,9	ATP metabolic process	GO:0046034	0.00815	0.0735	-1.01	-0.61	6.85695	-11.527	SLC25A25|0.627;PPARGC1A|0.564;HKDC1|2.366;COX7C|0.658	4	227	76	21829	http://www.ebi.ac.uk/QuickGO/GTerm?id=GO:0046034	[]
6	6	purine nucleoside metabolic process	GO:0042278	0.00815	0.0735	-1.02	-0.61	6.85695	-11.527	SLC25A25|0.627;PANK1|0.639;PPARGC1A|0.564;HKDC1|2.366	4	227	76	21829	http://www.ebi.ac.uk/QuickGO/GTerm?id=GO:0042278	[]
4	4	cell death	GO:0008219	0.00824	0.0738	1.44	0.52	6.85695	-11.527	CHAC1|0.521;CYR61|2.231;EGR1|2.376;JUN|2.208;PPARGC1A|0.564;TOP2A|0.53;SIK1|1.694;KIAA1324|5.521;SGK2|0.559;IRS2|1.866;PDK4|0.421	11	1385	76	21829	http://www.ebi.ac.uk/QuickGO/GTerm?id=GO:0008219	[]
8	6,8	regulation of kinase activity	GO:0043549	0.00826	0.0738	2.06	0.81	6.85695	-11.527	ACSL1|0.614;MST1R|1.705;CYR61|2.231;JUN|2.208;IRS2|1.866;LPAR3|2.868;DUSP8|1.567	7	663	76	21829	http://www.ebi.ac.uk/QuickGO/GTerm?id=GO:0043549	[]
5	5	response to reactive oxygen species	GO:0000302	0.00832	0.0739	-0.52	-0.38	6.85695	-11.527	SOD3|0.184;FOS|3.316;TRPA1|0.123	3	119	76	21829	http://www.ebi.ac.uk/QuickGO/GTerm?id=GO:0000302	[]
6	5,6	regulation of Wnt signaling pathway	GO:0030111	0.00852	0.0754	1.27	0.45	6.85695	-11.527	CDH2|1.906;EGR1|2.376;ANKRD6|0.513;MCC|2.125	4	230	76	21829	http://www.ebi.ac.uk/QuickGO/GTerm?id=GO:0030111	[]
6	5,6	cell differentiation involved in kidney development	GO:0061005	0.00898	0.0787	0.1	-0.1	6.85695	-11.527	PROM1|0.467;JAG1|1.703	2	41	76	21829	http://www.ebi.ac.uk/QuickGO/GTerm?id=GO:0061005	[]
5	5	organic hydroxy compound catabolic process	GO:1901616	0.00898	0.0787	-0.43	-0.34	6.85695	-11.527	ENPP2|0.6;MAOA|0.614	2	41	76	21829	http://www.ebi.ac.uk/QuickGO/GTerm?id=GO:1901616	[]
7	7	canonical Wnt signaling pathway	GO:0060070	0.00904	0.0788	1.27	0.45	6.85695	-11.527	CDH2|1.906;EGR1|2.376;ANKRD6|0.513;MCC|2.125	4	234	76	21829	http://www.ebi.ac.uk/QuickGO/GTerm?id=GO:0060070	[]
6	5,6	regulation of cellular protein metabolic process	GO:0032268	0.00915	0.0794	4.57	1.98	6.85695	-11.527	CAV2|0.417;CDH2|1.906;ACSL1|0.614;MST1R|1.705;CHAC1|0.521;CYR61|2.231;EGR1|2.376;JUN|2.208;WFDC1|0.417;KL|3.059;RNF144A|2.045;LPAR3|2.868;ANKRD6|0.513;DUSP8|1.567	14	2016	76	21829	http://www.ebi.ac.uk/QuickGO/GTerm?id=GO:0032268	[]
5	5	cell-cell adhesion via plasma-membrane adhesion molecules	GO:0098742	0.00958	0.0802	-0.19	-0.23	6.85695	-11.527	CDH2|1.906;FAT1|0.605;SDK2|2.638;CDHR5|0.509	4	238	76	21829	http://www.ebi.ac.uk/QuickGO/GTerm?id=GO:0098742	[]
2	2	positive regulation of biological process	GO:0048518	0.00979	0.0802	8.54	3.82	6.85695	-11.527	CAV2|0.417;ADAMTS9|0.583;CDH2|1.906;PROM1|0.467;ACSL1|0.614;MST1R|1.705;EVC|0.468;CYR61|2.231;EGR1|2.376;JUN|2.208;PPARGC1A|0.564;TOP2A|0.53;FOS|3.316;KIAA1324|5.521;OSCP1|0.14;SGK2|0.559;IRS2|1.866;KL|3.059;AGPAT2|1.693;RNF144A|2.045;LPAR3|2.868;CRHR2|2.007;ANKRD6|0.513;JAG1|1.703	24	4315	76	21829	http://www.ebi.ac.uk/QuickGO/GTerm?id=GO:0048518	[]
10	7,8,9,10	long-chain fatty acid transport	GO:0015909	0.00985	0.0802	-0.06	-0.17	6.85695	-11.527	ACSL1|0.614;IRS2|1.866	2	43	76	21829	http://www.ebi.ac.uk/QuickGO/GTerm?id=GO:0015909	[]
7	7	fatty acid beta-oxidation	GO:0006635	0.00985	0.0802	-0.06	-0.17	6.85695	-11.527	IRS2|1.866;Gga.6352|0.616	2	43	76	21829	http://www.ebi.ac.uk/QuickGO/GTerm?id=GO:0006635	[]
4	4	cardiac chamber development	GO:0003205	0.00993	0.0802	0.85	0.25	6.85695	-11.527	ADAMTS1|1.877;CYR61|2.231;JAG1|1.703	3	127	76	21829	http://www.ebi.ac.uk/QuickGO/GTerm?id=GO:0003205	[]
7	6,7	transmembrane receptor protein tyrosine kinase signaling pathway	GO:0007169	0.01	0.0802	0.12	-0.09	6.85695	-11.527	CAV2|0.417;MST1R|1.705;IGFBP1|0.446;IRS2|1.866;KL|3.059;PDK4|0.421	6	526	76	21829	http://www.ebi.ac.uk/QuickGO/GTerm?id=GO:0007169	[]
7	7	columnar/cuboidal epithelial cell differentiation	GO:0002065	0.0101	0.0802	0.23	-0.03	6.85695	-11.527	ADAMTS9|0.583;CDH2|1.906;JAG1|1.703	3	128	76	21829	http://www.ebi.ac.uk/QuickGO/GTerm?id=GO:0002065	[]
4	4	glomerulus development	GO:0032835	0.0103	0.0802	0.1	-0.1	6.85695	-11.527	PROM1|0.467;JAG1|1.703	2	44	76	21829	http://www.ebi.ac.uk/QuickGO/GTerm?id=GO:0032835	[]
10	8,9,10	regulation of protein serine/threonine kinase activity	GO:0071900	0.0104	0.0802	1.44	0.53	6.85695	-11.527	ACSL1|0.614;MST1R|1.705;JUN|2.208;LPAR3|2.868;DUSP8|1.567	5	379	76	21829	http://www.ebi.ac.uk/QuickGO/GTerm?id=GO:0071900	[]
10	8,9,10	positive regulation of protein kinase activity	GO:0045860	0.0104	0.0802	1.59	0.6	6.85695	-11.527	ACSL1|0.614;MST1R|1.705;CYR61|2.231;JUN|2.208;LPAR3|2.868	5	379	76	21829	http://www.ebi.ac.uk/QuickGO/GTerm?id=GO:0045860	[]
7	7	lysine metabolic process	GO:0006553	0.0104	0.0802	0	-0.14	6.85695	-11.527	PIPOX|1.809	1	3	76	21829	http://www.ebi.ac.uk/QuickGO/GTerm?id=GO:0006553	[]
8	6,8	phosphatidylcholine catabolic process	GO:0034638	0.0104	0.0802	0	-0.14	6.85695	-11.527	ENPP2|0.6	1	3	76	21829	http://www.ebi.ac.uk/QuickGO/GTerm?id=GO:0034638	[]
5	5	intussusceptive angiogenesis	GO:0002041	0.0104	0.0802	0	-0.14	6.85695	-11.527	CYR61|2.231	1	3	76	21829	http://www.ebi.ac.uk/QuickGO/GTerm?id=GO:0002041	[]
5	5	cranial ganglion formation	GO:0061560	0.0104	0.0802	0	-0.14	6.85695	-11.527	CDH2|1.906	1	3	76	21829	http://www.ebi.ac.uk/QuickGO/GTerm?id=GO:0061560	[]
4	4	ganglion formation	GO:0061554	0.0104	0.0802	0	-0.14	6.85695	-11.527	CDH2|1.906	1	3	76	21829	http://www.ebi.ac.uk/QuickGO/GTerm?id=GO:0061554	[]
6	5,6	cranial ganglion morphogenesis	GO:0061559	0.0104	0.0802	0	-0.14	6.85695	-11.527	CDH2|1.906	1	3	76	21829	http://www.ebi.ac.uk/QuickGO/GTerm?id=GO:0061559	[]
9	7,9	apoptotic chromosome condensation	GO:0030263	0.0104	0.0802	0	-0.14	6.85695	-11.527	TOP2A|0.53	1	3	76	21829	http://www.ebi.ac.uk/QuickGO/GTerm?id=GO:0030263	[]
6	6	terpene metabolic process	GO:0042214	0.0104	0.0802	0	-0.14	6.85695	-11.527	BCO1|0.596	1	3	76	21829	http://www.ebi.ac.uk/QuickGO/GTerm?id=GO:0042214	[]
4	4	positive regulation of energy homeostasis	GO:2000507	0.0104	0.0802	0	-0.14	6.85695	-11.527	PPARGC1A|0.564	1	3	76	21829	http://www.ebi.ac.uk/QuickGO/GTerm?id=GO:2000507	[]
6	6	neuroligin clustering involved in postsynaptic membrane assembly	GO:0097118	0.0104	0.0802	0	-0.14	6.85695	-11.527	CDH2|1.906	1	3	76	21829	http://www.ebi.ac.uk/QuickGO/GTerm?id=GO:0097118	[]
7	7	carotene metabolic process	GO:0016119	0.0104	0.0802	0	-0.14	6.85695	-11.527	BCO1|0.596	1	3	76	21829	http://www.ebi.ac.uk/QuickGO/GTerm?id=GO:0016119	[]
7	5,6,7	positive regulation of cellular respiration	GO:1901857	0.0104	0.0802	0	-0.14	6.85695	-11.527	PPARGC1A|0.564	1	3	76	21829	http://www.ebi.ac.uk/QuickGO/GTerm?id=GO:1901857	[]
7	7	thermoception	GO:0050955	0.0104	0.0802	0	-0.14	6.85695	-11.527	TRPA1|0.123	1	3	76	21829	http://www.ebi.ac.uk/QuickGO/GTerm?id=GO:0050955	[]
10	7,8,9,10	receptor-mediated endocytosis of virus by host cell	GO:0019065	0.0104	0.0802	0	-0.14	6.85695	-11.527	CAV2|0.417	1	3	76	21829	http://www.ebi.ac.uk/QuickGO/GTerm?id=GO:0019065	[]
10	6,9,10	regulation of acetyl-CoA biosynthetic process from pyruvate	GO:0010510	0.0104	0.0802	0	-0.14	6.85695	-11.527	PDK4|0.421	1	3	76	21829	http://www.ebi.ac.uk/QuickGO/GTerm?id=GO:0010510	[]
9	6,7,8,9	endocytosis involved in viral entry into host cell	GO:0075509	0.0104	0.0802	0	-0.14	6.85695	-11.527	CAV2|0.417	1	3	76	21829	http://www.ebi.ac.uk/QuickGO/GTerm?id=GO:0075509	[]
6	5,6	positive regulation of epithelial cell differentiation	GO:0030858	0.0108	0.0825	-0.57	-0.4	6.85695	-11.527	ADAMTS9|0.583;PROM1|0.467	2	45	76	21829	http://www.ebi.ac.uk/QuickGO/GTerm?id=GO:0030858	[]
11	7,8,9,10,11	regulation of MAP kinase activity	GO:0043405	0.011	0.0839	1.23	0.43	6.85695	-11.527	MST1R|1.705;JUN|2.208;LPAR3|2.868;DUSP8|1.567	4	248	76	21829	http://www.ebi.ac.uk/QuickGO/GTerm?id=GO:0043405	[]
7	7	glucose metabolic process	GO:0006006	0.011	0.0839	0.38	0.03	6.85695	-11.527	SIK1|1.694;IRS2|1.866;PDK4|0.421	3	132	76	21829	http://www.ebi.ac.uk/QuickGO/GTerm?id=GO:0006006	[]
7	6,7	morphogenesis of an epithelial sheet	GO:0002011	0.0112	0.085	0.58	0.13	6.85695	-11.527	CYR61|2.231;JAG1|1.703	2	46	76	21829	http://www.ebi.ac.uk/QuickGO/GTerm?id=GO:0002011	[]
6	4,5,6	positive regulation of macromolecule metabolic process	GO:0010604	0.0114	0.0864	4.99	2.17	6.85695	-11.527	CAV2|0.417;CDH2|1.906;ACSL1|0.614;MST1R|1.705;CYR61|2.231;EGR1|2.376;JUN|2.208;PPARGC1A|0.564;FOS|3.316;IRS2|1.866;KL|3.059;RNF144A|2.045;LPAR3|2.868;ANKRD6|0.513;JAG1|1.703	15	2286	76	21829	http://www.ebi.ac.uk/QuickGO/GTerm?id=GO:0010604	[]
4	4	tissue morphogenesis	GO:0048729	0.0115	0.0865	1.9	0.74	6.85695	-11.527	CDH2|1.906;PROM1|0.467;CYR61|2.231;SDK2|2.638;ANKRD6|0.513;JAG1|1.703	6	542	76	21829	http://www.ebi.ac.uk/QuickGO/GTerm?id=GO:0048729	[]
11	9,10,11	positive regulation of protein serine/threonine kinase activity	GO:0071902	0.0118	0.0882	1.25	0.44	6.85695	-11.527	ACSL1|0.614;MST1R|1.705;JUN|2.208;LPAR3|2.868	4	253	76	21829	http://www.ebi.ac.uk/QuickGO/GTerm?id=GO:0071902	[]
4	4	single-organism catabolic process	GO:0044712	0.0119	0.0885	-0.76	-0.49	6.85695	-11.527	ENPP2|0.6;ECI2|0.596;HKDC1|2.366;KIAA1324|5.521;PIPOX|1.809;IRS2|1.866;Gga.6352|0.616;LIPI|0.594	8	887	76	21829	http://www.ebi.ac.uk/QuickGO/GTerm?id=GO:0044712	[]
3	3	negative regulation of cellular process	GO:0048523	0.0123	0.0912	6.56	2.9	6.85695	-11.527	CAV2|0.417;CDH2|1.906;CHAC1|0.521;CYR61|2.231;EGR1|2.376;JUN|2.208;PPARGC1A|0.564;TOP2A|0.53;WFDC1|0.417;SIK1|1.694;KIAA1324|5.521;CHRDL1|0.429;IRS2|1.866;CRHR2|2.007;AEBP1|2.049;ANKRD6|0.513;DUSP8|1.567;JAG1|1.703;MCC|2.125;PDK4|0.421	20	3438	76	21829	http://www.ebi.ac.uk/QuickGO/GTerm?id=GO:0048523	[]
6	6	ribonucleoside metabolic process	GO:0009119	0.0126	0.0931	-1.02	-0.61	6.85695	-11.527	SLC25A25|0.627;PANK1|0.639;PPARGC1A|0.564;HKDC1|2.366	4	258	76	21829	http://www.ebi.ac.uk/QuickGO/GTerm?id=GO:0009119	[]
6	6	apoptotic process	GO:0006915	0.0127	0.0932	-0.53	-0.39	6.85695	-11.527	CHAC1|0.521;CYR61|2.231;EGR1|2.376;PPARGC1A|0.564;TOP2A|0.53;SIK1|1.694;KIAA1324|5.521;SGK2|0.559;IRS2|1.866;PDK4|0.421	10	1274	76	21829	http://www.ebi.ac.uk/QuickGO/GTerm?id=GO:0006915	[]
5	5	cardiovascular system development	GO:0072358	0.0129	0.0943	1.89	0.73	6.85695	-11.527	ADAMTS1|1.877;CDH2|1.906;ENPP2|0.6;CYR61|2.231;SIK1|1.694;CRHR2|2.007;JAG1|1.703	7	723	76	21829	http://www.ebi.ac.uk/QuickGO/GTerm?id=GO:0072358	[]
8	8	purine ribonucleoside triphosphate metabolic process	GO:0009205	0.0129	0.0943	-1.01	-0.61	6.85695	-11.527	SLC25A25|0.627;PPARGC1A|0.564;HKDC1|2.366;COX7C|0.658	4	260	76	21829	http://www.ebi.ac.uk/QuickGO/GTerm?id=GO:0009205	[]
9	7,9	regulation of sodium ion transport	GO:0002028	0.0132	0.0957	0.02	-0.13	6.85695	-11.527	SIK1|1.694;SGK2|0.559	2	50	76	21829	http://www.ebi.ac.uk/QuickGO/GTerm?id=GO:0002028	[]
9	7,8,9	positive regulation of kinase activity	GO:0033674	0.0136	0.0958	1.59	0.6	6.85695	-11.527	ACSL1|0.614;MST1R|1.705;CYR61|2.231;JUN|2.208;LPAR3|2.868	5	406	76	21829	http://www.ebi.ac.uk/QuickGO/GTerm?id=GO:0033674	[]
7	7	catechol-containing compound catabolic process	GO:0019614	0.0139	0.0958	0	-0.14	6.85695	-11.527	MAOA|0.614	1	4	76	21829	http://www.ebi.ac.uk/QuickGO/GTerm?id=GO:0019614	[]
10	6,8,9,10	negative regulation of plasma membrane long-chain fatty acid transport	GO:0010748	0.0139	0.0958	0	-0.14	6.85695	-11.527	IRS2|1.866	1	4	76	21829	http://www.ebi.ac.uk/QuickGO/GTerm?id=GO:0010748	[]
8	6,7,8	positive regulation of nephron tubule epithelial cell differentiation	GO:2000768	0.0139	0.0958	0	-0.14	6.85695	-11.527	PROM1|0.467	1	4	76	21829	http://www.ebi.ac.uk/QuickGO/GTerm?id=GO:2000768	[]
6	5,6	apoptotic process involved in heart morphogenesis	GO:0003278	0.0139	0.0958	0	-0.14	6.85695	-11.527	CYR61|2.231	1	4	76	21829	http://www.ebi.ac.uk/QuickGO/GTerm?id=GO:0003278	[]
9	7,8,9	regulation of plasma membrane long-chain fatty acid transport	GO:0010746	0.0139	0.0958	0	-0.14	6.85695	-11.527	IRS2|1.866	1	4	76	21829	http://www.ebi.ac.uk/QuickGO/GTerm?id=GO:0010746	[]
8	6,8	catecholamine catabolic process	GO:0042424	0.0139	0.0958	0	-0.14	6.85695	-11.527	MAOA|0.614	1	4	76	21829	http://www.ebi.ac.uk/QuickGO/GTerm?id=GO:0042424	[]
6	6	dopamine catabolic process	GO:0042420	0.0139	0.0958	0	-0.14	6.85695	-11.527	MAOA|0.614	1	4	76	21829	http://www.ebi.ac.uk/QuickGO/GTerm?id=GO:0042420	[]
7	5,6,7	positive regulation of sphingolipid biosynthetic process	GO:0090154	0.0139	0.0958	0	-0.14	6.85695	-11.527	CYR61|2.231	1	4	76	21829	http://www.ebi.ac.uk/QuickGO/GTerm?id=GO:0090154	[]
8	6,7,8	positive regulation of ceramide biosynthetic process	GO:2000304	0.0139	0.0958	0	-0.14	6.85695	-11.527	CYR61|2.231	1	4	76	21829	http://www.ebi.ac.uk/QuickGO/GTerm?id=GO:2000304	[]
5	5	Notch signaling involved in heart development	GO:0061314	0.0139	0.0958	0	-0.14	6.85695	-11.527	JAG1|1.703	1	4	76	21829	http://www.ebi.ac.uk/QuickGO/GTerm?id=GO:0061314	[]
11	8,10,11	regulation of ATP biosynthetic process	GO:2001169	0.0139	0.0958	0	-0.14	6.85695	-11.527	PPARGC1A|0.564	1	4	76	21829	http://www.ebi.ac.uk/QuickGO/GTerm?id=GO:2001169	[]
7	6,7	regulation of acyl-CoA biosynthetic process	GO:0050812	0.0139	0.0958	0	-0.14	6.85695	-11.527	PDK4|0.421	1	4	76	21829	http://www.ebi.ac.uk/QuickGO/GTerm?id=GO:0050812	[]
4	4	blood vessel morphogenesis	GO:0048514	0.0139	0.0958	1.38	0.5	6.85695	-11.527	CDH2|1.906;ENPP2|0.6;CYR61|2.231;CRHR2|2.007;JAG1|1.703	5	408	76	21829	http://www.ebi.ac.uk/QuickGO/GTerm?id=GO:0048514	[]
5	5	programmed cell death	GO:0012501	0.0141	0.097	-0.53	-0.39	6.85695	-11.527	CHAC1|0.521;CYR61|2.231;EGR1|2.376;PPARGC1A|0.564;TOP2A|0.53;SIK1|1.694;KIAA1324|5.521;SGK2|0.559;IRS2|1.866;PDK4|0.421	10	1296	76	21829	http://www.ebi.ac.uk/QuickGO/GTerm?id=GO:0012501	[]
7	7	purine nucleoside triphosphate metabolic process	GO:0009144	0.0143	0.0977	-1.01	-0.61	6.85695	-11.527	SLC25A25|0.627;PPARGC1A|0.564;HKDC1|2.366;COX7C|0.658	4	268	76	21829	http://www.ebi.ac.uk/QuickGO/GTerm?id=GO:0009144	[]
8	6,7,8	BMP signaling pathway	GO:0030509	0.0144	0.0983	0.37	0.03	6.85695	-11.527	CYR61|2.231;EGR1|2.376;CHRDL1|0.429	3	146	76	21829	http://www.ebi.ac.uk/QuickGO/GTerm?id=GO:0030509	[]
5	5	regulation of transferase activity	GO:0051338	0.0147	0.099	2.06	0.81	6.85695	-11.527	ACSL1|0.614;MST1R|1.705;CYR61|2.231;JUN|2.208;IRS2|1.866;LPAR3|2.868;DUSP8|1.567	7	742	76	21829	http://www.ebi.ac.uk/QuickGO/GTerm?id=GO:0051338	[]
6	5,6	positive regulation of osteoblast differentiation	GO:0045669	0.0147	0.099	0.58	0.13	6.85695	-11.527	CYR61|2.231;JAG1|1.703	2	53	76	21829	http://www.ebi.ac.uk/QuickGO/GTerm?id=GO:0045669	[]
6	6	eye morphogenesis	GO:0048592	0.0147	0.099	0.33	0.01	6.85695	-11.527	PROM1|0.467;SDK2|2.638;JAG1|1.703	3	147	76	21829	http://www.ebi.ac.uk/QuickGO/GTerm?id=GO:0048592	[]
3	3	primary metabolic process	GO:0044238	0.0148	0.099	-14.27	-6.76	6.85695	-11.527	RIC3|0.491;NIM1K|1.617;CAV2|0.417;CERS6|0.346;ADAMTS1|1.877;ADAMTS9|0.583;CDH2|1.906;CTSK|2.109;CDO1|0.672;SLC25A25|0.627;CRCP|0.599;ACSL1|0.614;MST1R|1.705;SLC2A2|0.635;CHAC1|0.521;ENPP2|0.6;ECI2|0.596;CYR61|2.231;PANK1|0.639;EGR1|2.376;JUN|2.208;PPARGC1A|0.564;TOP2A|0.53;RARA|1.526;FOS|3.316;WFDC1|0.417;HKDC1|2.366;LAP3|0.573;SIK1|1.694;BCO1|0.596;CHRDL1|0.429;CS|1.611;SGK2|0.559;PIPOX|1.809;IR…	51	11820	76	21829	http://www.ebi.ac.uk/QuickGO/GTerm?id=GO:0044238	[]
5	5	regulation of carbohydrate biosynthetic process	GO:0043255	0.0152	0.101	0.5	0.09	6.85695	-11.527	SIK1|1.694;IRS2|1.866	2	54	76	21829	http://www.ebi.ac.uk/QuickGO/GTerm?id=GO:0043255	[]
4	4	response to acid chemical	GO:0001101	0.0152	0.101	-0.18	-0.23	6.85695	-11.527	RARA|1.526;BCO1|0.596;PDK4|0.421	3	149	76	21829	http://www.ebi.ac.uk/QuickGO/GTerm?id=GO:0001101	[]
5	4,5	regulation of cell death	GO:0010941	0.0154	0.102	1.15	0.39	6.85695	-11.527	CYR61|2.231;EGR1|2.376;JUN|2.208;PPARGC1A|0.564;TOP2A|0.53;KIAA1324|5.521;SGK2|0.559;IRS2|1.866;PDK4|0.421	9	1118	76	21829	http://www.ebi.ac.uk/QuickGO/GTerm?id=GO:0010941	[]
7	7	ribonucleoside triphosphate metabolic process	GO:0009199	0.0158	0.103	-1.01	-0.61	6.85695	-11.527	SLC25A25|0.627;PPARGC1A|0.564;HKDC1|2.366;COX7C|0.658	4	276	76	21829	http://www.ebi.ac.uk/QuickGO/GTerm?id=GO:0009199	[]
5	5	regulation of generation of precursor metabolites and energy	GO:0043467	0.0158	0.103	-0.02	-0.15	6.85695	-11.527	PPARGC1A|0.564;IRS2|1.866	2	55	76	21829	http://www.ebi.ac.uk/QuickGO/GTerm?id=GO:0043467	[]
5	5	cellular response to oxidative stress	GO:0034599	0.0158	0.103	-0.52	-0.38	6.85695	-11.527	SOD3|0.184;PPARGC1A|0.564;FOS|3.316	3	151	76	21829	http://www.ebi.ac.uk/QuickGO/GTerm?id=GO:0034599	[]
7	7	skeletal muscle tissue development	GO:0007519	0.0158	0.103	0.38	0.03	6.85695	-11.527	CAV2|0.417;EGR1|2.376;FOS|3.316	3	151	76	21829	http://www.ebi.ac.uk/QuickGO/GTerm?id=GO:0007519	[]
8	8	purine ribonucleoside monophosphate metabolic process	GO:0009167	0.0159	0.103	-1.01	-0.61	6.85695	-11.527	SLC25A25|0.627;PPARGC1A|0.564;HKDC1|2.366;COX7C|0.658	4	277	76	21829	http://www.ebi.ac.uk/QuickGO/GTerm?id=GO:0009167	[]
6	5,6	regulation of intracellular signal transduction	GO:1902531	0.0161	0.103	3.31	1.4	6.85695	-11.527	CAV2|0.417;CDH2|1.906;MST1R|1.705;CYR61|2.231;JUN|2.208;KL|3.059;LPAR3|2.868;CRHR2|2.007;ANKRD6|0.513;DUSP8|1.567	10	1323	76	21829	http://www.ebi.ac.uk/QuickGO/GTerm?id=GO:1902531	[]
4	4	sulfur compound metabolic process	GO:0006790	0.0161	0.103	-1.09	-0.65	6.85695	-11.527	CDO1|0.672;CHAC1|0.521;PIPOX|1.809;PDK4|0.421	4	278	76	21829	http://www.ebi.ac.uk/QuickGO/GTerm?id=GO:0006790	[]
7	7	purine nucleoside monophosphate metabolic process	GO:0009126	0.0163	0.103	-1.01	-0.61	6.85695	-11.527	SLC25A25|0.627;PPARGC1A|0.564;HKDC1|2.366;COX7C|0.658	4	279	76	21829	http://www.ebi.ac.uk/QuickGO/GTerm?id=GO:0009126	[]
5	5	regulation of protein metabolic process	GO:0051246	0.0166	0.103	4.57	1.98	6.85695	-11.527	CAV2|0.417;CDH2|1.906;ACSL1|0.614;MST1R|1.705;CHAC1|0.521;CYR61|2.231;EGR1|2.376;JUN|2.208;WFDC1|0.417;KL|3.059;RNF144A|2.045;LPAR3|2.868;ANKRD6|0.513;DUSP8|1.567	14	2167	76	21829	http://www.ebi.ac.uk/QuickGO/GTerm?id=GO:0051246	[]
5	4,5	regulation of ossification	GO:0030278	0.0166	0.103	1.07	0.35	6.85695	-11.527	CYR61|2.231;KL|3.059;JAG1|1.703	3	154	76	21829	http://www.ebi.ac.uk/QuickGO/GTerm?id=GO:0030278	[]
6	6	camera-type eye development	GO:0043010	0.0167	0.103	-0.12	-0.2	6.85695	-11.527	PROM1|0.467;SLC25A25|0.627;SDK2|2.638;JAG1|1.703	4	281	76	21829	http://www.ebi.ac.uk/QuickGO/GTerm?id=GO:0043010	[]
6	5,6	regulation of Notch signaling pathway	GO:0008593	0.0169	0.103	0.05	-0.12	6.85695	-11.527	CHAC1|0.521;JAG1|1.703	2	57	76	21829	http://www.ebi.ac.uk/QuickGO/GTerm?id=GO:0008593	[]
4	4	thioester metabolic process	GO:0035383	0.0169	0.103	0.12	-0.09	6.85695	-11.527	PIPOX|1.809;PDK4|0.421	2	57	76	21829	http://www.ebi.ac.uk/QuickGO/GTerm?id=GO:0035383	[]
6	5,6	acyl-CoA metabolic process	GO:0006637	0.0169	0.103	0.12	-0.09	6.85695	-11.527	PIPOX|1.809;PDK4|0.421	2	57	76	21829	http://www.ebi.ac.uk/QuickGO/GTerm?id=GO:0006637	[]
5	5	cell differentiation	GO:0030154	0.017	0.103	6	2.64	6.85695	-11.527	LRFN5|1.736;CAV2|0.417;ADAMTS9|0.583;CDH2|1.906;PROM1|0.467;GFRA3|0.646;CHAC1|0.521;CYR61|2.231;EGR1|2.376;JUN|2.208;SDK2|2.638;FOS|3.316;SIK1|1.694;CCK1R|5.905;CHRDL1|0.429;LPAR3|2.868;JAG1|1.703	17	2847	76	21829	http://www.ebi.ac.uk/QuickGO/GTerm?id=GO:0030154	[]
5	5	ganglion morphogenesis	GO:0061552	0.0173	0.103	0	-0.14	6.85695	-11.527	CDH2|1.906	1	5	76	21829	http://www.ebi.ac.uk/QuickGO/GTerm?id=GO:0061552	[]
6	6	pulmonary artery morphogenesis	GO:0061156	0.0173	0.103	0	-0.14	6.85695	-11.527	JAG1|1.703	1	5	76	21829	http://www.ebi.ac.uk/QuickGO/GTerm?id=GO:0061156	[]
9	6,7,8,9	positive regulation of MAPKKK cascade by fibroblast growth factor receptor signaling pathway	GO:0090080	0.0173	0.103	0	-0.14	6.85695	-11.527	KL|3.059	1	5	76	21829	http://www.ebi.ac.uk/QuickGO/GTerm?id=GO:0090080	[]
7	6,7	detection of mechanical stimulus involved in sensory perception of pain	GO:0050966	0.0173	0.103	0	-0.14	6.85695	-11.527	TRPA1|0.123	1	5	76	21829	http://www.ebi.ac.uk/QuickGO/GTerm?id=GO:0050966	[]
6	6	phenol-containing compound catabolic process	GO:0019336	0.0173	0.103	0	-0.14	6.85695	-11.527	MAOA|0.614	1	5	76	21829	http://www.ebi.ac.uk/QuickGO/GTerm?id=GO:0019336	[]
10	6,7,9,10	positive regulation of fatty acid beta-oxidation	GO:0032000	0.0173	0.103	0	-0.14	6.85695	-11.527	IRS2|1.866	1	5	76	21829	http://www.ebi.ac.uk/QuickGO/GTerm?id=GO:0032000	[]
9	5,7,8,9	negative regulation of fatty acid transport	GO:2000192	0.0173	0.103	0	-0.14	6.85695	-11.527	IRS2|1.866	1	5	76	21829	http://www.ebi.ac.uk/QuickGO/GTerm?id=GO:2000192	[]
11	8,9,10,11	plasma membrane long-chain fatty acid transport	GO:0015911	0.0173	0.103	0	-0.14	6.85695	-11.527	IRS2|1.866	1	5	76	21829	http://www.ebi.ac.uk/QuickGO/GTerm?id=GO:0015911	[]
11	6,7,8,9,10,11	microtubule nucleation by microtubule organizing center	GO:0051418	0.0173	0.103	0	-0.14	6.85695	-11.527	MZT1|0.461	1	5	76	21829	http://www.ebi.ac.uk/QuickGO/GTerm?id=GO:0051418	[]
9	7,8,9	fatty acid transmembrane transport	GO:1902001	0.0173	0.103	0	-0.14	6.85695	-11.527	IRS2|1.866	1	5	76	21829	http://www.ebi.ac.uk/QuickGO/GTerm?id=GO:1902001	[]
7	5,6,7	positive regulation of epithelial cell differentiation involved in kidney development	GO:2000698	0.0173	0.103	0	-0.14	6.85695	-11.527	PROM1|0.467	1	5	76	21829	http://www.ebi.ac.uk/QuickGO/GTerm?id=GO:2000698	[]
9	6,7,9	positive regulation of neuroepithelial cell differentiation	GO:1902913	0.0173	0.103	0	-0.14	6.85695	-11.527	ADAMTS9|0.583	1	5	76	21829	http://www.ebi.ac.uk/QuickGO/GTerm?id=GO:1902913	[]
4	4	interphase microtubule nucleation by interphase microtubule organizing center	GO:0051415	0.0173	0.103	0	-0.14	6.85695	-11.527	MZT1|0.461	1	5	76	21829	http://www.ebi.ac.uk/QuickGO/GTerm?id=GO:0051415	[]
8	6,7,8	negative regulation of anion transmembrane transport	GO:1903960	0.0173	0.103	0	-0.14	6.85695	-11.527	IRS2|1.866	1	5	76	21829	http://www.ebi.ac.uk/QuickGO/GTerm?id=GO:1903960	[]
8	7,8	L-cysteine metabolic process	GO:0046439	0.0173	0.103	0	-0.14	6.85695	-11.527	CDO1|0.672	1	5	76	21829	http://www.ebi.ac.uk/QuickGO/GTerm?id=GO:0046439	[]
8	5,8	retina morphogenesis in camera-type eye	GO:0060042	0.0174	0.104	-0.09	-0.18	6.85695	-11.527	PROM1|0.467;SDK2|2.638	2	58	76	21829	http://www.ebi.ac.uk/QuickGO/GTerm?id=GO:0060042	[]
5	5	nucleoside metabolic process	GO:0009116	0.0175	0.104	-1.02	-0.61	6.85695	-11.527	SLC25A25|0.627;PANK1|0.639;PPARGC1A|0.564;HKDC1|2.366	4	285	76	21829	http://www.ebi.ac.uk/QuickGO/GTerm?id=GO:0009116	[]
4	3,4	regulation of circadian rhythm	GO:0042752	0.018	0.106	0.02	-0.13	6.85695	-11.527	PPARGC1A|0.564;SIK1|1.694	2	59	76	21829	http://www.ebi.ac.uk/QuickGO/GTerm?id=GO:0042752	[]
6	6	skeletal muscle organ development	GO:0060538	0.0181	0.106	0.38	0.03	6.85695	-11.527	CAV2|0.417;EGR1|2.376;FOS|3.316	3	159	76	21829	http://www.ebi.ac.uk/QuickGO/GTerm?id=GO:0060538	[]
5	5	cellular response to BMP stimulus	GO:0071773	0.0181	0.106	0.37	0.03	6.85695	-11.527	CYR61|2.231;EGR1|2.376;CHRDL1|0.429	3	159	76	21829	http://www.ebi.ac.uk/QuickGO/GTerm?id=GO:0071773	[]
4	4	response to BMP	GO:0071772	0.0184	0.108	0.37	0.03	6.85695	-11.527	CYR61|2.231;EGR1|2.376;CHRDL1|0.429	3	160	76	21829	http://www.ebi.ac.uk/QuickGO/GTerm?id=GO:0071772	[]
6	6	sphingolipid biosynthetic process	GO:0030148	0.0186	0.109	0.11	-0.09	6.85695	-11.527	CERS6|0.346;CYR61|2.231	2	60	76	21829	http://www.ebi.ac.uk/QuickGO/GTerm?id=GO:0030148	[]
9	7,8,9	regulation of protein kinase activity	GO:0045859	0.0192	0.111	1.79	0.69	6.85695	-11.527	ACSL1|0.614;MST1R|1.705;CYR61|2.231;JUN|2.208;LPAR3|2.868;DUSP8|1.567	6	608	76	21829	http://www.ebi.ac.uk/QuickGO/GTerm?id=GO:0045859	[]
4	4	reactive oxygen species metabolic process	GO:0072593	0.0196	0.111	-0.35	-0.3	6.85695	-11.527	SOD3|0.184;CYR61|2.231;PDK4|0.421	3	164	76	21829	http://www.ebi.ac.uk/QuickGO/GTerm?id=GO:0072593	[]
4	4	cardiac septum morphogenesis	GO:0060411	0.0198	0.111	0.58	0.13	6.85695	-11.527	CYR61|2.231;JAG1|1.703	2	62	76	21829	http://www.ebi.ac.uk/QuickGO/GTerm?id=GO:0060411	[]
5	5	circulatory system development	GO:0072359	0.0199	0.111	1.89	0.73	6.85695	-11.527	ADAMTS1|1.877;CDH2|1.906;ENPP2|0.6;CYR61|2.231;SIK1|1.694;CRHR2|2.007;JAG1|1.703	7	789	76	21829	http://www.ebi.ac.uk/QuickGO/GTerm?id=GO:0072359	[]
3	3	organic substance metabolic process	GO:0071704	0.0199	0.111	-14.49	-6.86	6.85695	-11.527	RIC3|0.491;NIM1K|1.617;CAV2|0.417;CERS6|0.346;ADAMTS1|1.877;ADAMTS9|0.583;CDH2|1.906;CTSK|2.109;CDO1|0.672;SLC25A25|0.627;CRCP|0.599;ACSL1|0.614;MST1R|1.705;SLC2A2|0.635;CHAC1|0.521;ENPP2|0.6;ECI2|0.596;CYR61|2.231;PANK1|0.639;EGR1|2.376;JUN|2.208;PPARGC1A|0.564;TOP2A|0.53;RARA|1.526;FOS|3.316;WFDC1|0.417;HKDC1|2.366;MAOA|0.614;LAP3|0.573;SIK1|1.694;BCO1|0.596;CHRDL1|0.429;CS|1.611;SGK2|0.559;PIP…	52	12271	76	21829	http://www.ebi.ac.uk/QuickGO/GTerm?id=GO:0071704	[]
7	7	ribonucleoside monophosphate metabolic process	GO:0009161	0.02	0.111	-1.01	-0.61	6.85695	-11.527	SLC25A25|0.627;PPARGC1A|0.564;HKDC1|2.366;COX7C|0.658	4	297	76	21829	http://www.ebi.ac.uk/QuickGO/GTerm?id=GO:0009161	[]
7	5,6,7	positive regulation of autophagosome assembly	GO:2000786	0.0207	0.111	0	-0.14	6.85695	-11.527	KIAA1324|5.521	1	6	76	21829	http://www.ebi.ac.uk/QuickGO/GTerm?id=GO:2000786	[]
6	6	postsynaptic density protein 95 clustering	GO:0097119	0.0207	0.111	0	-0.14	6.85695	-11.527	CDH2|1.906	1	6	76	21829	http://www.ebi.ac.uk/QuickGO/GTerm?id=GO:0097119	[]
8	7,8	neural crest cell delamination	GO:0036032	0.0207	0.111	0	-0.14	6.85695	-11.527	CDH2|1.906	1	6	76	21829	http://www.ebi.ac.uk/QuickGO/GTerm?id=GO:0036032	[]
7	7	radial glial cell differentiation	GO:0060019	0.0207	0.111	0	-0.14	6.85695	-11.527	CDH2|1.906	1	6	76	21829	http://www.ebi.ac.uk/QuickGO/GTerm?id=GO:0060019	[]
6	6	trigeminal nerve structural organization	GO:0021637	0.0207	0.111	0	-0.14	6.85695	-11.527	CDH2|1.906	1	6	76	21829	http://www.ebi.ac.uk/QuickGO/GTerm?id=GO:0021637	[]
8	7,8	glomerular visceral epithelial cell development	GO:0072015	0.0207	0.111	0	-0.14	6.85695	-11.527	JAG1|1.703	1	6	76	21829	http://www.ebi.ac.uk/QuickGO/GTerm?id=GO:0072015	[]
7	6,7	delamination	GO:0060232	0.0207	0.111	0	-0.14	6.85695	-11.527	CDH2|1.906	1	6	76	21829	http://www.ebi.ac.uk/QuickGO/GTerm?id=GO:0060232	[]
7	7	phosphatidic acid biosynthetic process	GO:0006654	0.0207	0.111	0	-0.14	6.85695	-11.527	AGPAT2|1.693	1	6	76	21829	http://www.ebi.ac.uk/QuickGO/GTerm?id=GO:0006654	[]
7	4,5,6,7	positive regulation of synaptic vesicle clustering	GO:2000809	0.0207	0.111	0	-0.14	6.85695	-11.527	CDH2|1.906	1	6	76	21829	http://www.ebi.ac.uk/QuickGO/GTerm?id=GO:2000809	[]
5	4,5	presynaptic active zone organization	GO:1990709	0.0207	0.111	0	-0.14	6.85695	-11.527	CDH2|1.906	1	6	76	21829	http://www.ebi.ac.uk/QuickGO/GTerm?id=GO:1990709	[]
11	7,8,10,11	positive regulation of Wnt signaling pathway, planar cell polarity pathway	GO:2000096	0.0207	0.111	0	-0.14	6.85695	-11.527	ANKRD6|0.513	1	6	76	21829	http://www.ebi.ac.uk/QuickGO/GTerm?id=GO:2000096	[]
9	6,7,9	negative regulation of endothelial cell differentiation	GO:0045602	0.0207	0.111	0	-0.14	6.85695	-11.527	JAG1|1.703	1	6	76	21829	http://www.ebi.ac.uk/QuickGO/GTerm?id=GO:0045602	[]
7	6,7	positive regulation of dopamine receptor signaling pathway	GO:0060161	0.0207	0.111	0	-0.14	6.85695	-11.527	CAV2|0.417	1	6	76	21829	http://www.ebi.ac.uk/QuickGO/GTerm?id=GO:0060161	[]
4	4	ciliary body morphogenesis	GO:0061073	0.0207	0.111	0	-0.14	6.85695	-11.527	JAG1|1.703	1	6	76	21829	http://www.ebi.ac.uk/QuickGO/GTerm?id=GO:0061073	[]
7	6,7	glomerular epithelial cell development	GO:0072310	0.0207	0.111	0	-0.14	6.85695	-11.527	JAG1|1.703	1	6	76	21829	http://www.ebi.ac.uk/QuickGO/GTerm?id=GO:0072310	[]
7	7	phosphatidic acid metabolic process	GO:0046473	0.0207	0.111	0	-0.14	6.85695	-11.527	AGPAT2|1.693	1	6	76	21829	http://www.ebi.ac.uk/QuickGO/GTerm?id=GO:0046473	[]
5	5	presynaptic active zone assembly	GO:1904071	0.0207	0.111	0	-0.14	6.85695	-11.527	CDH2|1.906	1	6	76	21829	http://www.ebi.ac.uk/QuickGO/GTerm?id=GO:1904071	[]
8	6,7,8	regulation of mitochondrial DNA metabolic process	GO:1901858	0.0207	0.111	0	-0.14	6.85695	-11.527	PPARGC1A|0.564	1	6	76	21829	http://www.ebi.ac.uk/QuickGO/GTerm?id=GO:1901858	[]
7	5,6,7	positive regulation of melanocyte differentiation	GO:0045636	0.0207	0.111	0	-0.14	6.85695	-11.527	ADAMTS9|0.583	1	6	76	21829	http://www.ebi.ac.uk/QuickGO/GTerm?id=GO:0045636	[]
6	6	response to corticotropin-releasing hormone	GO:0043435	0.0207	0.111	0	-0.14	6.85695	-11.527	CRHR2|2.007	1	6	76	21829	http://www.ebi.ac.uk/QuickGO/GTerm?id=GO:0043435	[]
7	7	cellular response to corticotropin-releasing hormone stimulus	GO:0071376	0.0207	0.111	0	-0.14	6.85695	-11.527	CRHR2|2.007	1	6	76	21829	http://www.ebi.ac.uk/QuickGO/GTerm?id=GO:0071376	[]
7	5,6,7	adiponectin-activated signaling pathway	GO:0033211	0.0207	0.111	0	-0.14	6.85695	-11.527	ACSL1|0.614	1	6	76	21829	http://www.ebi.ac.uk/QuickGO/GTerm?id=GO:0033211	[]
6	6	nucleoside triphosphate metabolic process	GO:0009141	0.0209	0.112	-1.01	-0.61	6.85695	-11.527	SLC25A25|0.627;PPARGC1A|0.564;HKDC1|2.366;COX7C|0.658	4	301	76	21829	http://www.ebi.ac.uk/QuickGO/GTerm?id=GO:0009141	[]
9	6,7,8,9	fatty acid transport	GO:0015908	0.021	0.112	-0.06	-0.17	6.85695	-11.527	ACSL1|0.614;IRS2|1.866	2	64	76	21829	http://www.ebi.ac.uk/QuickGO/GTerm?id=GO:0015908	[]
4	4	response to drug	GO:0042493	0.0212	0.113	0.91	0.28	6.85695	-11.527	JUN|2.208;FOS|3.316;TRPA1|0.123	3	169	76	21829	http://www.ebi.ac.uk/QuickGO/GTerm?id=GO:0042493	[]
6	6	positive regulation of transferase activity	GO:0051347	0.0214	0.113	1.59	0.6	6.85695	-11.527	ACSL1|0.614;MST1R|1.705;CYR61|2.231;JUN|2.208;LPAR3|2.868	5	456	76	21829	http://www.ebi.ac.uk/QuickGO/GTerm?id=GO:0051347	[]
6	6	hexose metabolic process	GO:0019318	0.0216	0.114	0.38	0.03	6.85695	-11.527	SIK1|1.694;IRS2|1.866;PDK4|0.421	3	170	76	21829	http://www.ebi.ac.uk/QuickGO/GTerm?id=GO:0019318	[]
4	4	blood vessel development	GO:0001568	0.0218	0.115	1.38	0.5	6.85695	-11.527	CDH2|1.906;ENPP2|0.6;CYR61|2.231;CRHR2|2.007;JAG1|1.703	5	458	76	21829	http://www.ebi.ac.uk/QuickGO/GTerm?id=GO:0001568	[]
6	6	striated muscle tissue development	GO:0014706	0.0223	0.117	1.51	0.56	6.85695	-11.527	CAV2|0.417;EGR1|2.376;FOS|3.316;SIK1|1.694	4	307	76	21829	http://www.ebi.ac.uk/QuickGO/GTerm?id=GO:0014706	[]
4	4	organic substance catabolic process	GO:1901575	0.0225	0.118	-1.54	-0.85	6.85695	-11.527	CTSK|2.109;CHAC1|0.521;ENPP2|0.6;ECI2|0.596;HKDC1|2.366;MAOA|0.614;PIPOX|1.809;IRS2|1.866;RNF144A|2.045;Gga.6352|0.616;LIPI|0.594	11	1603	76	21829	http://www.ebi.ac.uk/QuickGO/GTerm?id=GO:1901575	[]
5	5	coenzyme metabolic process	GO:0006732	0.0226	0.118	-0.06	-0.17	6.85695	-11.527	PANK1|0.639;HKDC1|2.366;PIPOX|1.809;PDK4|0.421	4	308	76	21829	http://www.ebi.ac.uk/QuickGO/GTerm?id=GO:0006732	[]
5	5	response to retinoic acid	GO:0032526	0.0229	0.119	0.04	-0.12	6.85695	-11.527	RARA|1.526;BCO1|0.596	2	67	76	21829	http://www.ebi.ac.uk/QuickGO/GTerm?id=GO:0032526	[]
6	5,6	respiratory electron transport chain	GO:0022904	0.0235	0.119	-0.43	-0.34	6.85695	-11.527	PPARGC1A|0.564;COX7C|0.658	2	68	76	21829	http://www.ebi.ac.uk/QuickGO/GTerm?id=GO:0022904	[]
6	5,6	positive regulation of myeloid cell differentiation	GO:0045639	0.0235	0.119	0.75	0.21	6.85695	-11.527	FOS|3.316;JAG1|1.703	2	68	76	21829	http://www.ebi.ac.uk/QuickGO/GTerm?id=GO:0045639	[]
6	6	nucleoside monophosphate metabolic process	GO:0009123	0.0235	0.119	-1.01	-0.61	6.85695	-11.527	SLC25A25|0.627;PPARGC1A|0.564;HKDC1|2.366;COX7C|0.658	4	312	76	21829	http://www.ebi.ac.uk/QuickGO/GTerm?id=GO:0009123	[]
4	4	regulation of cell differentiation	GO:0045595	0.0237	0.119	2.98	1.24	6.85695	-11.527	ADAMTS9|0.583;CDH2|1.906;PROM1|0.467;CYR61|2.231;JUN|2.208;FOS|3.316;SIK1|1.694;LPAR3|2.868;JAG1|1.703	9	1204	76	21829	http://www.ebi.ac.uk/QuickGO/GTerm?id=GO:0045595	[]
7	6,7	negative regulation of cAMP-mediated signaling	GO:0043951	0.0241	0.119	0	-0.14	6.85695	-11.527	CRHR2|2.007	1	7	76	21829	http://www.ebi.ac.uk/QuickGO/GTerm?id=GO:0043951	[]
10	7,8,9,10	ATP transport	GO:0015867	0.0241	0.119	0	-0.14	6.85695	-11.527	SLC25A25|0.627	1	7	76	21829	http://www.ebi.ac.uk/QuickGO/GTerm?id=GO:0015867	[]
FALSE	obselete	pulmonary valve development	GO:0003177	0.0241	0.119	0	-0.14	6.85695	-11.527	JAG1|1.703	1	7	76	21829	http://www.ebi.ac.uk/QuickGO/GTerm?id=GO:0003177	[]
6	5,6	positive regulation of presynaptic membrane organization	GO:1901631	0.0241	0.119	0	-0.14	6.85695	-11.527	CDH2|1.906	1	7	76	21829	http://www.ebi.ac.uk/QuickGO/GTerm?id=GO:1901631	[]
11	8,9,10,11	long-chain fatty acid import	GO:0044539	0.0241	0.119	0	-0.14	6.85695	-11.527	ACSL1|0.614	1	7	76	21829	http://www.ebi.ac.uk/QuickGO/GTerm?id=GO:0044539	[]
9	6,7,8,9	mitochondrial electron transport, cytochrome c to oxygen	GO:0006123	0.0241	0.119	0	-0.14	6.85695	-11.527	COX7C|0.658	1	7	76	21829	http://www.ebi.ac.uk/QuickGO/GTerm?id=GO:0006123	[]
7	5,7	trigeminal nerve morphogenesis	GO:0021636	0.0241	0.119	0	-0.14	6.85695	-11.527	CDH2|1.906	1	7	76	21829	http://www.ebi.ac.uk/QuickGO/GTerm?id=GO:0021636	[]
10	7,8,9,10	ADP transport	GO:0015866	0.0241	0.119	0	-0.14	6.85695	-11.527	SLC25A25|0.627	1	7	76	21829	http://www.ebi.ac.uk/QuickGO/GTerm?id=GO:0015866	[]
8	5,6,7,8	regulation of ceramide biosynthetic process	GO:2000303	0.0241	0.119	0	-0.14	6.85695	-11.527	CYR61|2.231	1	7	76	21829	http://www.ebi.ac.uk/QuickGO/GTerm?id=GO:2000303	[]
10	6,7,9,10	regulation of transcription from RNA polymerase II promoter in response to hypoxia	GO:0061418	0.0241	0.119	0	-0.14	6.85695	-11.527	EGR1|2.376	1	7	76	21829	http://www.ebi.ac.uk/QuickGO/GTerm?id=GO:0061418	[]
8	4,6,7,8	negative regulation of organic acid transport	GO:0032891	0.0241	0.119	0	-0.14	6.85695	-11.527	IRS2|1.866	1	7	76	21829	http://www.ebi.ac.uk/QuickGO/GTerm?id=GO:0032891	[]
7	5,7	cardiac neural crest cell development involved in outflow tract morphogenesis	GO:0061309	0.0241	0.119	0	-0.14	6.85695	-11.527	JAG1|1.703	1	7	76	21829	http://www.ebi.ac.uk/QuickGO/GTerm?id=GO:0061309	[]
7	7	glycerophospholipid catabolic process	GO:0046475	0.0241	0.119	0	-0.14	6.85695	-11.527	ENPP2|0.6	1	7	76	21829	http://www.ebi.ac.uk/QuickGO/GTerm?id=GO:0046475	[]
6	5,6	energy reserve metabolic process	GO:0006112	0.0241	0.119	0.76	0.21	6.85695	-11.527	IRS2|1.866;KL|3.059	2	69	76	21829	http://www.ebi.ac.uk/QuickGO/GTerm?id=GO:0006112	[]
6	6	ceramide metabolic process	GO:0006672	0.0248	0.122	0.11	-0.09	6.85695	-11.527	CERS6|0.346;CYR61|2.231	2	70	76	21829	http://www.ebi.ac.uk/QuickGO/GTerm?id=GO:0006672	[]
2	2	metabolic process	GO:0008152	0.0254	0.125	-17.56	-8.29	6.85695	-11.527	RIC3|0.491;NIM1K|1.617;CAV2|0.417;CERS6|0.346;ADAMTS1|1.877;ADAMTS9|0.583;CDH2|1.906;CTSK|2.109;SOD3|0.184;CDO1|0.672;SLC25A25|0.627;CRCP|0.599;ACSL1|0.614;MST1R|1.705;SLC2A2|0.635;ETNPPL|0.481;CHAC1|0.521;ENPP2|0.6;ECI2|0.596;CYR61|2.231;PANK1|0.639;EGR1|2.376;JUN|2.208;PPARGC1A|0.564;TOP2A|0.53;RARA|1.526;ATP1A1|1.604;FOS|3.316;WFDC1|0.417;HKDC1|2.366;MAOA|0.614;GPX2|7.618;LAP3|0.573;SIK1|1.694…	58	14240	76	21829	http://www.ebi.ac.uk/QuickGO/GTerm?id=GO:0008152	[]
6	5,6	regulation of transmembrane receptor protein serine/threonine kinase signaling pathway	GO:0090092	0.0261	0.127	-0.35	-0.3	6.85695	-11.527	CAV2|0.417;CYR61|2.231;CHRDL1|0.429	3	183	76	21829	http://www.ebi.ac.uk/QuickGO/GTerm?id=GO:0090092	[]
5	5	vasculature development	GO:0001944	0.0266	0.127	1.38	0.5	6.85695	-11.527	CDH2|1.906;ENPP2|0.6;CYR61|2.231;CRHR2|2.007;JAG1|1.703	5	483	76	21829	http://www.ebi.ac.uk/QuickGO/GTerm?id=GO:0001944	[]
6	6	skeletal muscle cell differentiation	GO:0035914	0.0268	0.127	0.9	0.27	6.85695	-11.527	EGR1|2.376;FOS|3.316	2	73	76	21829	http://www.ebi.ac.uk/QuickGO/GTerm?id=GO:0035914	[]
4	4	muscle structure development	GO:0061061	0.0268	0.127	1.79	0.69	6.85695	-11.527	CAV2|0.417;CDH2|1.906;EGR1|2.376;FOS|3.316;SIK1|1.694	5	484	76	21829	http://www.ebi.ac.uk/QuickGO/GTerm?id=GO:0061061	[]
5	4,5	electron transport chain	GO:0022900	0.0275	0.127	-0.43	-0.34	6.85695	-11.527	PPARGC1A|0.564;COX7C|0.658	2	74	76	21829	http://www.ebi.ac.uk/QuickGO/GTerm?id=GO:0022900	[]
5	4,5	inositol metabolic process	GO:0006020	0.0275	0.127	0	-0.14	6.85695	-11.527	SLC5A3|1.572	1	8	76	21829	http://www.ebi.ac.uk/QuickGO/GTerm?id=GO:0006020	[]
7	4,5,7	ovulation from ovarian follicle	GO:0001542	0.0275	0.127	0	-0.14	6.85695	-11.527	ADAMTS1|1.877	1	8	76	21829	http://www.ebi.ac.uk/QuickGO/GTerm?id=GO:0001542	[]
6	4,5,6	positive regulation of pigment cell differentiation	GO:0050942	0.0275	0.127	0	-0.14	6.85695	-11.527	ADAMTS9|0.583	1	8	76	21829	http://www.ebi.ac.uk/QuickGO/GTerm?id=GO:0050942	[]
6	5,6	dsRNA transport	GO:0033227	0.0275	0.127	0	-0.14	6.85695	-11.527	SIDT1|5.384	1	8	76	21829	http://www.ebi.ac.uk/QuickGO/GTerm?id=GO:0033227	[]
7	6,7	regulation of dopamine receptor signaling pathway	GO:0060159	0.0275	0.127	0	-0.14	6.85695	-11.527	CAV2|0.417	1	8	76	21829	http://www.ebi.ac.uk/QuickGO/GTerm?id=GO:0060159	[]
8	8	transcription initiation from RNA polymerase III promoter	GO:0006384	0.0275	0.127	0	-0.14	6.85695	-11.527	CRCP|0.599	1	8	76	21829	http://www.ebi.ac.uk/QuickGO/GTerm?id=GO:0006384	[]
5	5	pulmonary valve morphogenesis	GO:0003184	0.0275	0.127	0	-0.14	6.85695	-11.527	JAG1|1.703	1	8	76	21829	http://www.ebi.ac.uk/QuickGO/GTerm?id=GO:0003184	[]
7	4,5,6,7	regulation of synaptic vesicle clustering	GO:2000807	0.0275	0.127	0	-0.14	6.85695	-11.527	CDH2|1.906	1	8	76	21829	http://www.ebi.ac.uk/QuickGO/GTerm?id=GO:2000807	[]
7	4,6,7	regulation of energy homeostasis	GO:2000505	0.0275	0.127	0	-0.14	6.85695	-11.527	PPARGC1A|0.564	1	8	76	21829	http://www.ebi.ac.uk/QuickGO/GTerm?id=GO:2000505	[]
6	6	regulation of triglyceride biosynthetic process	GO:0010866	0.0275	0.127	0	-0.14	6.85695	-11.527	SIK1|1.694	1	8	76	21829	http://www.ebi.ac.uk/QuickGO/GTerm?id=GO:0010866	[]
7	7	distal tubule development	GO:0072017	0.0275	0.127	0	-0.14	6.85695	-11.527	JAG1|1.703	1	8	76	21829	http://www.ebi.ac.uk/QuickGO/GTerm?id=GO:0072017	[]
11	9,10,11	negative regulation of B cell apoptotic process	GO:0002903	0.0275	0.127	0	-0.14	6.85695	-11.527	IRS2|1.866	1	8	76	21829	http://www.ebi.ac.uk/QuickGO/GTerm?id=GO:0002903	[]
3	3	positive regulation of developmental pigmentation	GO:0048087	0.0275	0.127	0	-0.14	6.85695	-11.527	ADAMTS9|0.583	1	8	76	21829	http://www.ebi.ac.uk/QuickGO/GTerm?id=GO:0048087	[]
FALSE	obselete	bleb assembly	GO:0032060	0.0275	0.127	0	-0.14	6.85695	-11.527	LPAR3|2.868	1	8	76	21829	http://www.ebi.ac.uk/QuickGO/GTerm?id=GO:0032060	[]
8	6,7,8	positive regulation of cAMP-mediated signaling	GO:0043950	0.0275	0.127	0	-0.14	6.85695	-11.527	CRHR2|2.007	1	8	76	21829	http://www.ebi.ac.uk/QuickGO/GTerm?id=GO:0043950	[]
8	7,8	trigeminal ganglion development	GO:0061551	0.0275	0.127	0	-0.14	6.85695	-11.527	CDH2|1.906	1	8	76	21829	http://www.ebi.ac.uk/QuickGO/GTerm?id=GO:0061551	[]
6	5,6	synaptic vesicle clustering	GO:0097091	0.0275	0.127	0	-0.14	6.85695	-11.527	CDH2|1.906	1	8	76	21829	http://www.ebi.ac.uk/QuickGO/GTerm?id=GO:0097091	[]
9	7,8,9	positive regulation of MAP kinase activity	GO:0043406	0.0276	0.127	1.03	0.34	6.85695	-11.527	MST1R|1.705;JUN|2.208;LPAR3|2.868	3	187	76	21829	http://www.ebi.ac.uk/QuickGO/GTerm?id=GO:0043406	[]
2	2	negative regulation of biological process	GO:0048519	0.0277	0.128	6.56	2.9	6.85695	-11.527	CAV2|0.417;CDH2|1.906;CHAC1|0.521;CYR61|2.231;EGR1|2.376;JUN|2.208;PPARGC1A|0.564;TOP2A|0.53;WFDC1|0.417;SIK1|1.694;KIAA1324|5.521;CHRDL1|0.429;IRS2|1.866;CRHR2|2.007;AEBP1|2.049;ANKRD6|0.513;DUSP8|1.567;JAG1|1.703;MCC|2.125;PDK4|0.421	20	3726	76	21829	http://www.ebi.ac.uk/QuickGO/GTerm?id=GO:0048519	[]
3	3	positive regulation of metabolic process	GO:0009893	0.028	0.129	5.73	2.51	6.85695	-11.527	CAV2|0.417;CDH2|1.906;ACSL1|0.614;MST1R|1.705;CYR61|2.231;EGR1|2.376;JUN|2.208;PPARGC1A|0.564;FOS|3.316;KIAA1324|5.521;IRS2|1.866;KL|3.059;RNF144A|2.045;LPAR3|2.868;ANKRD6|0.513;JAG1|1.703	16	2777	76	21829	http://www.ebi.ac.uk/QuickGO/GTerm?id=GO:0009893	[]
7	6,7	regulation of apoptotic process	GO:0042981	0.0281	0.129	-0.58	-0.41	6.85695	-11.527	CYR61|2.231;EGR1|2.376;PPARGC1A|0.564;TOP2A|0.53;KIAA1324|5.521;SGK2|0.559;IRS2|1.866;PDK4|0.421	8	1041	76	21829	http://www.ebi.ac.uk/QuickGO/GTerm?id=GO:0042981	[]
4	4	sensory organ development	GO:0007423	0.0283	0.129	-0.65	-0.44	6.85695	-11.527	PROM1|0.467;SLC25A25|0.627;SDK2|2.638;CHRDL1|0.429;JAG1|1.703	5	491	76	21829	http://www.ebi.ac.uk/QuickGO/GTerm?id=GO:0007423	[]
3	3	response to abiotic stimulus	GO:0009628	0.0283	0.129	3.11	1.3	6.85695	-11.527	SOD3|0.184;EGR1|2.376;JUN|2.208;FOS|3.316;SIK1|1.694;TRPA1|0.123	6	665	76	21829	http://www.ebi.ac.uk/QuickGO/GTerm?id=GO:0009628	[]
3	3	positive regulation of multicellular organismal process	GO:0051240	0.0284	0.129	2.85	1.18	6.85695	-11.527	PROM1|0.467;CYR61|2.231;PPARGC1A|0.564;FOS|3.316;KL|3.059;AGPAT2|1.693;LPAR3|2.868;JAG1|1.703	8	1043	76	21829	http://www.ebi.ac.uk/QuickGO/GTerm?id=GO:0051240	[]
6	6	neurogenesis	GO:0022008	0.0286	0.13	3.24	1.36	6.85695	-11.527	LRFN5|1.736;CDH2|1.906;GFRA3|0.646;CHAC1|0.521;SDK2|2.638;CCK1R|5.905;CHRDL1|0.429;LPAR3|2.868;JAG1|1.703	9	1245	76	21829	http://www.ebi.ac.uk/QuickGO/GTerm?id=GO:0022008	[]
7	7	purine ribonucleotide metabolic process	GO:0009150	0.029	0.131	-1.2	-0.7	6.85695	-11.527	SLC25A25|0.627;PANK1|0.639;PPARGC1A|0.564;HKDC1|2.366;COX7C|0.658	5	494	76	21829	http://www.ebi.ac.uk/QuickGO/GTerm?id=GO:0009150	[]
5	5	regulation of cell migration	GO:0030334	0.0292	0.132	1.45	0.53	6.85695	-11.527	CDH2|1.906;ENPP2|0.6;CYR61|2.231;IRS2|1.866;MCC|2.125	5	495	76	21829	http://www.ebi.ac.uk/QuickGO/GTerm?id=GO:0030334	[]
6	5,6	regulation of programmed cell death	GO:0043067	0.0296	0.134	-0.58	-0.41	6.85695	-11.527	CYR61|2.231;EGR1|2.376;PPARGC1A|0.564;TOP2A|0.53;KIAA1324|5.521;SGK2|0.559;IRS2|1.866;PDK4|0.421	8	1052	76	21829	http://www.ebi.ac.uk/QuickGO/GTerm?id=GO:0043067	[]
6	6	glutathione catabolic process	GO:0006751	0.0309	0.134	0	-0.14	6.85695	-11.527	CHAC1|0.521	1	9	76	21829	http://www.ebi.ac.uk/QuickGO/GTerm?id=GO:0006751	[]
8	5,6,7,8	regulation of melanocyte differentiation	GO:0045634	0.0309	0.134	0	-0.14	6.85695	-11.527	ADAMTS9|0.583	1	9	76	21829	http://www.ebi.ac.uk/QuickGO/GTerm?id=GO:0045634	[]
8	7,8	plasma membrane raft assembly	GO:0044854	0.0309	0.134	0	-0.14	6.85695	-11.527	CAV2|0.417	1	9	76	21829	http://www.ebi.ac.uk/QuickGO/GTerm?id=GO:0044854	[]
9	6,8,9	regulation of fatty acid beta-oxidation	GO:0031998	0.0309	0.134	0	-0.14	6.85695	-11.527	IRS2|1.866	1	9	76	21829	http://www.ebi.ac.uk/QuickGO/GTerm?id=GO:0031998	[]
6	6	regulation of presynaptic membrane organization	GO:1901629	0.0309	0.134	0	-0.14	6.85695	-11.527	CDH2|1.906	1	9	76	21829	http://www.ebi.ac.uk/QuickGO/GTerm?id=GO:1901629	[]
7	6,7	positive regulation of nucleoside metabolic process	GO:0045979	0.0309	0.134	0	-0.14	6.85695	-11.527	PPARGC1A|0.564	1	9	76	21829	http://www.ebi.ac.uk/QuickGO/GTerm?id=GO:0045979	[]
7	7	loop of Henle development	GO:0072070	0.0309	0.134	0	-0.14	6.85695	-11.527	JAG1|1.703	1	9	76	21829	http://www.ebi.ac.uk/QuickGO/GTerm?id=GO:0072070	[]
10	5,7,8,9,10	cardiac neural crest cell development involved in heart development	GO:0061308	0.0309	0.134	0	-0.14	6.85695	-11.527	JAG1|1.703	1	9	76	21829	http://www.ebi.ac.uk/QuickGO/GTerm?id=GO:0061308	[]
9	8,9	caveola assembly	GO:0070836	0.0309	0.134	0	-0.14	6.85695	-11.527	CAV2|0.417	1	9	76	21829	http://www.ebi.ac.uk/QuickGO/GTerm?id=GO:0070836	[]
10	7,8,9,10	positive regulation of ATP metabolic process	GO:1903580	0.0309	0.134	0	-0.14	6.85695	-11.527	PPARGC1A|0.564	1	9	76	21829	http://www.ebi.ac.uk/QuickGO/GTerm?id=GO:1903580	[]
7	6,7	plasma membrane raft organization	GO:0044857	0.0309	0.134	0	-0.14	6.85695	-11.527	CAV2|0.417	1	9	76	21829	http://www.ebi.ac.uk/QuickGO/GTerm?id=GO:0044857	[]
7	6,7	polyol transport	GO:0015791	0.0309	0.134	0	-0.14	6.85695	-11.527	SLC5A3|1.572	1	9	76	21829	http://www.ebi.ac.uk/QuickGO/GTerm?id=GO:0015791	[]
6	6	positive regulation of vacuole organization	GO:0044090	0.0309	0.134	0	-0.14	6.85695	-11.527	KIAA1324|5.521	1	9	76	21829	http://www.ebi.ac.uk/QuickGO/GTerm?id=GO:0044090	[]
5	5	cardiac neural crest cell differentiation involved in heart development	GO:0061307	0.0309	0.134	0	-0.14	6.85695	-11.527	JAG1|1.703	1	9	76	21829	http://www.ebi.ac.uk/QuickGO/GTerm?id=GO:0061307	[]
6	5,6	regulation of sulfur metabolic process	GO:0042762	0.0309	0.134	0	-0.14	6.85695	-11.527	PDK4|0.421	1	9	76	21829	http://www.ebi.ac.uk/QuickGO/GTerm?id=GO:0042762	[]
5	5	monosaccharide metabolic process	GO:0005996	0.0311	0.135	0.38	0.03	6.85695	-11.527	SIK1|1.694;IRS2|1.866;PDK4|0.421	3	196	76	21829	http://www.ebi.ac.uk/QuickGO/GTerm?id=GO:0005996	[]
3	3	cellular metabolic process	GO:0044237	0.0314	0.136	-14.79	-7	6.85695	-11.527	RIC3|0.491;NIM1K|1.617;CAV2|0.417;CERS6|0.346;CDH2|1.906;CTSK|2.109;SOD3|0.184;CDO1|0.672;SLC25A25|0.627;CRCP|0.599;ACSL1|0.614;MST1R|1.705;CHAC1|0.521;ENPP2|0.6;ECI2|0.596;CYR61|2.231;PANK1|0.639;EGR1|2.376;JUN|2.208;PPARGC1A|0.564;TOP2A|0.53;RARA|1.526;FOS|3.316;WFDC1|0.417;HKDC1|2.366;MAOA|0.614;SIK1|1.694;BCO1|0.596;KIAA1324|5.521;CHRDL1|0.429;CS|1.611;SGK2|0.559;PIPOX|1.809;IRS2|1.866;KL|3.0…	49	11623	76	21829	http://www.ebi.ac.uk/QuickGO/GTerm?id=GO:0044237	[]
8	8	sodium ion transport	GO:0006814	0.0323	0.139	0.25	-0.02	6.85695	-11.527	ATP1A1|1.604;SIK1|1.694;SGK2|0.559	3	199	76	21829	http://www.ebi.ac.uk/QuickGO/GTerm?id=GO:0006814	[]
6	6	purine nucleotide metabolic process	GO:0006163	0.0328	0.141	-1.2	-0.7	6.85695	-11.527	SLC25A25|0.627;PANK1|0.639;PPARGC1A|0.564;HKDC1|2.366;COX7C|0.658	5	511	76	21829	http://www.ebi.ac.uk/QuickGO/GTerm?id=GO:0006163	[]
4	4	regulation of cell motility	GO:2000145	0.0333	0.142	1.45	0.53	6.85695	-11.527	CDH2|1.906;ENPP2|0.6;CYR61|2.231;IRS2|1.866;MCC|2.125	5	513	76	21829	http://www.ebi.ac.uk/QuickGO/GTerm?id=GO:2000145	[]
6	4,5,6	hormone-mediated signaling pathway	GO:0009755	0.0335	0.142	0.21	-0.04	6.85695	-11.527	ACSL1|0.614;RARA|1.526;CRHR2|2.007	3	202	76	21829	http://www.ebi.ac.uk/QuickGO/GTerm?id=GO:0009755	[]
4	4	organic hydroxy compound metabolic process	GO:1901615	0.0338	0.142	-0.85	-0.54	6.85695	-11.527	ENPP2|0.6;MAOA|0.614;BCO1|0.596;SLC5A3|1.572	4	350	76	21829	http://www.ebi.ac.uk/QuickGO/GTerm?id=GO:1901615	[]
3	3	catabolic process	GO:0009056	0.0339	0.142	-0.9	-0.56	6.85695	-11.527	CTSK|2.109;CHAC1|0.521;ENPP2|0.6;ECI2|0.596;HKDC1|2.366;MAOA|0.614;KIAA1324|5.521;PIPOX|1.809;IRS2|1.866;RNF144A|2.045;Gga.6352|0.616;LIPI|0.594	12	1928	76	21829	http://www.ebi.ac.uk/QuickGO/GTerm?id=GO:0009056	[]
5	4,5	cardiac septum development	GO:0003279	0.034	0.142	0.58	0.13	6.85695	-11.527	CYR61|2.231;JAG1|1.703	2	83	76	21829	http://www.ebi.ac.uk/QuickGO/GTerm?id=GO:0003279	[]
6	6	cellular response to reactive oxygen species	GO:0034614	0.034	0.142	0.21	-0.04	6.85695	-11.527	SOD3|0.184;FOS|3.316	2	83	76	21829	http://www.ebi.ac.uk/QuickGO/GTerm?id=GO:0034614	[]
6	6	response to muramyl dipeptide	GO:0032495	0.0343	0.142	0	-0.14	6.85695	-11.527	JAG1|1.703	1	10	76	21829	http://www.ebi.ac.uk/QuickGO/GTerm?id=GO:0032495	[]
9	5,8,9	acetyl-CoA biosynthetic process from pyruvate	GO:0006086	0.0343	0.142	0	-0.14	6.85695	-11.527	PDK4|0.421	1	10	76	21829	http://www.ebi.ac.uk/QuickGO/GTerm?id=GO:0006086	[]
8	7,8	purine nucleotide transport	GO:0015865	0.0343	0.142	0	-0.14	6.85695	-11.527	SLC25A25|0.627	1	10	76	21829	http://www.ebi.ac.uk/QuickGO/GTerm?id=GO:0015865	[]
6	6	chondroblast differentiation	GO:0060591	0.0343	0.142	0	-0.14	6.85695	-11.527	CYR61|2.231	1	10	76	21829	http://www.ebi.ac.uk/QuickGO/GTerm?id=GO:0060591	[]
9	6,7,8,9	purine ribonucleotide transport	GO:0015868	0.0343	0.142	0	-0.14	6.85695	-11.527	SLC25A25|0.627	1	10	76	21829	http://www.ebi.ac.uk/QuickGO/GTerm?id=GO:0015868	[]
11	6,7,8,9,10,11	positive regulation of glycogen biosynthetic process	GO:0045725	0.0343	0.142	0	-0.14	6.85695	-11.527	IRS2|1.866	1	10	76	21829	http://www.ebi.ac.uk/QuickGO/GTerm?id=GO:0045725	[]
9	8,9	adenine nucleotide transport	GO:0051503	0.0343	0.142	0	-0.14	6.85695	-11.527	SLC25A25|0.627	1	10	76	21829	http://www.ebi.ac.uk/QuickGO/GTerm?id=GO:0051503	[]
6	5,6	cell-cell adhesion mediated by cadherin	GO:0044331	0.0343	0.142	0	-0.14	6.85695	-11.527	CDH2|1.906	1	10	76	21829	http://www.ebi.ac.uk/QuickGO/GTerm?id=GO:0044331	[]
11	7,8,10,11	regulation of Wnt signaling pathway, planar cell polarity pathway	GO:2000095	0.0343	0.142	0	-0.14	6.85695	-11.527	ANKRD6|0.513	1	10	76	21829	http://www.ebi.ac.uk/QuickGO/GTerm?id=GO:2000095	[]
4	4	response to muscle activity	GO:0014850	0.0343	0.142	0	-0.14	6.85695	-11.527	PPARGC1A|0.564	1	10	76	21829	http://www.ebi.ac.uk/QuickGO/GTerm?id=GO:0014850	[]
7	5,6,7	ATP hydrolysis coupled transmembrane transport	GO:0090662	0.0343	0.142	0	-0.14	6.85695	-11.527	ATP1A1|1.604	1	10	76	21829	http://www.ebi.ac.uk/QuickGO/GTerm?id=GO:0090662	[]
4	4	regulation of cellular response to growth factor stimulus	GO:0090287	0.0344	0.142	-0.35	-0.3	6.85695	-11.527	CAV2|0.417;CYR61|2.231;CHRDL1|0.429	3	204	76	21829	http://www.ebi.ac.uk/QuickGO/GTerm?id=GO:0090287	[]
7	6,7	ribonucleotide metabolic process	GO:0009259	0.0347	0.143	-1.2	-0.7	6.85695	-11.527	SLC25A25|0.627;PANK1|0.639;PPARGC1A|0.564;HKDC1|2.366;COX7C|0.658	5	519	76	21829	http://www.ebi.ac.uk/QuickGO/GTerm?id=GO:0009259	[]
4	4	cell-cell adhesion	GO:0098609	0.0353	0.145	1.94	0.76	6.85695	-11.527	CDH2|1.906;FAT1|0.605;CYR61|2.231;EGR1|2.376;SDK2|2.638;CDHR5|0.509	6	701	76	21829	http://www.ebi.ac.uk/QuickGO/GTerm?id=GO:0098609	[]
6	6	nephron tubule development	GO:0072080	0.0355	0.145	0.1	-0.1	6.85695	-11.527	PROM1|0.467;JAG1|1.703	2	85	76	21829	http://www.ebi.ac.uk/QuickGO/GTerm?id=GO:0072080	[]
8	8	response to glucose	GO:0009749	0.0355	0.145	0.65	0.16	6.85695	-11.527	EGR1|2.376;IRS2|1.866	2	85	76	21829	http://www.ebi.ac.uk/QuickGO/GTerm?id=GO:0009749	[]
5	4,5	intracellular signal transduction	GO:0035556	0.0359	0.147	4.29	1.85	6.85695	-11.527	NIM1K|1.617;CAV2|0.417;CDH2|1.906;MST1R|1.705;CHAC1|0.521;CYR61|2.231;JUN|2.208;SIK1|1.694;SGK2|0.559;KL|3.059;LPAR3|2.868;CRHR2|2.007;ANKRD6|0.513;DUSP8|1.567	14	2398	76	21829	http://www.ebi.ac.uk/QuickGO/GTerm?id=GO:0035556	[]
7	7	response to hexose	GO:0009746	0.0362	0.147	0.65	0.16	6.85695	-11.527	EGR1|2.376;IRS2|1.866	2	86	76	21829	http://www.ebi.ac.uk/QuickGO/GTerm?id=GO:0009746	[]
6	6	response to monosaccharide	GO:0034284	0.0362	0.147	0.65	0.16	6.85695	-11.527	EGR1|2.376;IRS2|1.866	2	86	76	21829	http://www.ebi.ac.uk/QuickGO/GTerm?id=GO:0034284	[]
5	5	heart morphogenesis	GO:0003007	0.0365	0.147	0.85	0.25	6.85695	-11.527	ADAMTS1|1.877;CYR61|2.231;JAG1|1.703	3	209	76	21829	http://www.ebi.ac.uk/QuickGO/GTerm?id=GO:0003007	[]
4	4	regulation of cell proliferation	GO:0042127	0.0368	0.147	2.43	0.99	6.85695	-11.527	CAV2|0.417;CDH2|1.906;CYR61|2.231;JUN|2.208;SGK2|0.559;IRS2|1.866;JAG1|1.703;MCC|2.125	8	1098	76	21829	http://www.ebi.ac.uk/QuickGO/GTerm?id=GO:0042127	[]
5	4,5	positive regulation of cell growth	GO:0030307	0.037	0.147	0.8	0.23	6.85695	-11.527	JUN|2.208;LPAR3|2.868	2	87	76	21829	http://www.ebi.ac.uk/QuickGO/GTerm?id=GO:0030307	[]
7	7	nephron tubule epithelial cell differentiation	GO:0072160	0.0376	0.147	0	-0.14	6.85695	-11.527	PROM1|0.467	1	11	76	21829	http://www.ebi.ac.uk/QuickGO/GTerm?id=GO:0072160	[]
6	5,6	heart trabecula formation	GO:0060347	0.0376	0.147	0	-0.14	6.85695	-11.527	ADAMTS1|1.877	1	11	76	21829	http://www.ebi.ac.uk/QuickGO/GTerm?id=GO:0060347	[]
9	5,9	retinal metabolic process	GO:0042574	0.0376	0.147	0	-0.14	6.85695	-11.527	BCO1|0.596	1	11	76	21829	http://www.ebi.ac.uk/QuickGO/GTerm?id=GO:0042574	[]
5	5	cranial nerve structural organization	GO:0021604	0.0376	0.147	0	-0.14	6.85695	-11.527	CDH2|1.906	1	11	76	21829	http://www.ebi.ac.uk/QuickGO/GTerm?id=GO:0021604	[]
7	4,5,6,7	regulation of pigment cell differentiation	GO:0050932	0.0376	0.147	0	-0.14	6.85695	-11.527	ADAMTS9|0.583	1	11	76	21829	http://www.ebi.ac.uk/QuickGO/GTerm?id=GO:0050932	[]
8	7,8	regulation of nephron tubule epithelial cell differentiation	GO:0072182	0.0376	0.147	0	-0.14	6.85695	-11.527	PROM1|0.467	1	11	76	21829	http://www.ebi.ac.uk/QuickGO/GTerm?id=GO:0072182	[]
6	6	negative regulation of gluconeogenesis	GO:0045721	0.0376	0.147	0	-0.14	6.85695	-11.527	SIK1|1.694	1	11	76	21829	http://www.ebi.ac.uk/QuickGO/GTerm?id=GO:0045721	[]
6	5,6	positive regulation of collateral sprouting	GO:0048672	0.0376	0.147	0	-0.14	6.85695	-11.527	LPAR3|2.868	1	11	76	21829	http://www.ebi.ac.uk/QuickGO/GTerm?id=GO:0048672	[]
6	5,6	positive regulation of osteoblast proliferation	GO:0033690	0.0376	0.147	0	-0.14	6.85695	-11.527	CYR61|2.231	1	11	76	21829	http://www.ebi.ac.uk/QuickGO/GTerm?id=GO:0033690	[]
8	6,7,8	positive regulation of non-canonical Wnt signaling pathway	GO:2000052	0.0376	0.147	0	-0.14	6.85695	-11.527	ANKRD6|0.513	1	11	76	21829	http://www.ebi.ac.uk/QuickGO/GTerm?id=GO:2000052	[]
6	6	trigeminal nerve development	GO:0021559	0.0376	0.147	0	-0.14	6.85695	-11.527	CDH2|1.906	1	11	76	21829	http://www.ebi.ac.uk/QuickGO/GTerm?id=GO:0021559	[]
7	6,7	cranial ganglion development	GO:0061550	0.0376	0.147	0	-0.14	6.85695	-11.527	CDH2|1.906	1	11	76	21829	http://www.ebi.ac.uk/QuickGO/GTerm?id=GO:0061550	[]
6	5,6	transport of virus	GO:0046794	0.0376	0.147	0	-0.14	6.85695	-11.527	CAV2|0.417	1	11	76	21829	http://www.ebi.ac.uk/QuickGO/GTerm?id=GO:0046794	[]
7	6,7	establishment or maintenance of transmembrane electrochemical gradient	GO:0010248	0.0376	0.147	0	-0.14	6.85695	-11.527	ATP1A1|1.604	1	11	76	21829	http://www.ebi.ac.uk/QuickGO/GTerm?id=GO:0010248	[]
6	5,6	regulation of membrane lipid metabolic process	GO:1905038	0.0376	0.147	0	-0.14	6.85695	-11.527	CYR61|2.231	1	11	76	21829	http://www.ebi.ac.uk/QuickGO/GTerm?id=GO:1905038	[]
6	6	calcium-dependent cell-cell adhesion via plasma membrane cell adhesion molecules	GO:0016339	0.0376	0.147	0	-0.14	6.85695	-11.527	CDH2|1.906	1	11	76	21829	http://www.ebi.ac.uk/QuickGO/GTerm?id=GO:0016339	[]
9	8,9	glucose transport	GO:0015758	0.0378	0.147	-0.07	-0.18	6.85695	-11.527	SLC2A2|0.635;IRS2|1.866	2	88	76	21829	http://www.ebi.ac.uk/QuickGO/GTerm?id=GO:0015758	[]
7	7	myotube differentiation	GO:0014902	0.0378	0.147	0.15	-0.07	6.85695	-11.527	CAV2|0.417;SIK1|1.694	2	88	76	21829	http://www.ebi.ac.uk/QuickGO/GTerm?id=GO:0014902	[]
5	5	ribose phosphate metabolic process	GO:0019693	0.0388	0.15	-1.2	-0.7	6.85695	-11.527	SLC25A25|0.627;PANK1|0.639;PPARGC1A|0.564;HKDC1|2.366;COX7C|0.658	5	535	76	21829	http://www.ebi.ac.uk/QuickGO/GTerm?id=GO:0019693	[]
7	6,7	organic anion transport	GO:0015711	0.0389	0.15	-1.06	-0.63	6.85695	-11.527	SLC25A25|0.627;ACSL1|0.614;IRS2|1.866;SLC6A14|0.423	4	366	76	21829	http://www.ebi.ac.uk/QuickGO/GTerm?id=GO:0015711	[]
6	5,6	renal tubule development	GO:0061326	0.0393	0.151	0.1	-0.1	6.85695	-11.527	PROM1|0.467;JAG1|1.703	2	90	76	21829	http://www.ebi.ac.uk/QuickGO/GTerm?id=GO:0061326	[]
7	5,6,7	negative regulation of transmembrane receptor protein serine/threonine kinase signaling pathway	GO:0090101	0.0393	0.151	-0.75	-0.49	6.85695	-11.527	CAV2|0.417;CHRDL1|0.429	2	90	76	21829	http://www.ebi.ac.uk/QuickGO/GTerm?id=GO:0090101	[]
4	4	response to inorganic substance	GO:0010035	0.0397	0.152	-0.52	-0.38	6.85695	-11.527	SOD3|0.184;FOS|3.316;TRPA1|0.123	3	216	76	21829	http://www.ebi.ac.uk/QuickGO/GTerm?id=GO:0010035	[]
7	6,7	positive regulation of mitochondrion organization	GO:0010822	0.0401	0.152	-1.1	-0.65	6.85695	-11.527	PPARGC1A|0.564;OSCP1|0.14	2	91	76	21829	http://www.ebi.ac.uk/QuickGO/GTerm?id=GO:0010822	[]
9	5,6,7,8,9	regulation of BMP signaling pathway	GO:0030510	0.0401	0.152	0.02	-0.13	6.85695	-11.527	CYR61|2.231;CHRDL1|0.429	2	91	76	21829	http://www.ebi.ac.uk/QuickGO/GTerm?id=GO:0030510	[]
8	7,8	axonogenesis	GO:0007409	0.0409	0.152	1.66	0.63	6.85695	-11.527	LRFN5|1.736;GFRA3|0.646;CCK1R|5.905;LPAR3|2.868	4	372	76	21829	http://www.ebi.ac.uk/QuickGO/GTerm?id=GO:0007409	[]
6	5,6	negative regulation of epithelial cell proliferation	GO:0050680	0.0409	0.152	0.05	-0.12	6.85695	-11.527	CAV2|0.417;MCC|2.125	2	92	76	21829	http://www.ebi.ac.uk/QuickGO/GTerm?id=GO:0050680	[]
8	7,8	hexose transport	GO:0008645	0.0409	0.152	-0.07	-0.18	6.85695	-11.527	SLC2A2|0.635;IRS2|1.866	2	92	76	21829	http://www.ebi.ac.uk/QuickGO/GTerm?id=GO:0008645	[]
11	8,10,11	toll-like receptor 21 signaling pathway	GO:0035682	0.041	0.152	0	-0.14	6.85695	-11.527	JUN|2.208	1	12	76	21829	http://www.ebi.ac.uk/QuickGO/GTerm?id=GO:0035682	[]
6	6	sensory perception of temperature stimulus	GO:0050951	0.041	0.152	0	-0.14	6.85695	-11.527	TRPA1|0.123	1	12	76	21829	http://www.ebi.ac.uk/QuickGO/GTerm?id=GO:0050951	[]
10	9,10	cellular sodium ion homeostasis	GO:0006883	0.041	0.152	0	-0.14	6.85695	-11.527	SGK2|0.559	1	12	76	21829	http://www.ebi.ac.uk/QuickGO/GTerm?id=GO:0006883	[]
7	6,7	regulation of cellular respiration	GO:0043457	0.041	0.152	0	-0.14	6.85695	-11.527	PPARGC1A|0.564	1	12	76	21829	http://www.ebi.ac.uk/QuickGO/GTerm?id=GO:0043457	[]
3	3	multi-organism localization	GO:1902579	0.041	0.152	0	-0.14	6.85695	-11.527	CAV2|0.417	1	12	76	21829	http://www.ebi.ac.uk/QuickGO/GTerm?id=GO:1902579	[]
6	4,6	ovulation	GO:0030728	0.041	0.152	0	-0.14	6.85695	-11.527	ADAMTS1|1.877	1	12	76	21829	http://www.ebi.ac.uk/QuickGO/GTerm?id=GO:0030728	[]
10	5,6,7,8,9,10	positive regulation of glycogen metabolic process	GO:0070875	0.041	0.152	0	-0.14	6.85695	-11.527	IRS2|1.866	1	12	76	21829	http://www.ebi.ac.uk/QuickGO/GTerm?id=GO:0070875	[]
6	6	photoperiodism	GO:0009648	0.041	0.152	0	-0.14	6.85695	-11.527	SIK1|1.694	1	12	76	21829	http://www.ebi.ac.uk/QuickGO/GTerm?id=GO:0009648	[]
6	5,6	entrainment of circadian clock by photoperiod	GO:0043153	0.041	0.152	0	-0.14	6.85695	-11.527	SIK1|1.694	1	12	76	21829	http://www.ebi.ac.uk/QuickGO/GTerm?id=GO:0043153	[]
5	4,5	multi-organism transport	GO:0044766	0.041	0.152	0	-0.14	6.85695	-11.527	CAV2|0.417	1	12	76	21829	http://www.ebi.ac.uk/QuickGO/GTerm?id=GO:0044766	[]
5	5	positive regulation of cellular catabolic process	GO:0031331	0.041	0.152	1.32	0.47	6.85695	-11.527	KIAA1324|5.521;IRS2|1.866;RNF144A|2.045	3	219	76	21829	http://www.ebi.ac.uk/QuickGO/GTerm?id=GO:0031331	[]
4	4	cellular developmental process	GO:0048869	0.0416	0.154	6	2.64	6.85695	-11.527	LRFN5|1.736;CAV2|0.417;ADAMTS9|0.583;CDH2|1.906;PROM1|0.467;GFRA3|0.646;CHAC1|0.521;CYR61|2.231;EGR1|2.376;JUN|2.208;SDK2|2.638;FOS|3.316;SIK1|1.694;CCK1R|5.905;CHRDL1|0.429;LPAR3|2.868;JAG1|1.703	17	3157	76	21829	http://www.ebi.ac.uk/QuickGO/GTerm?id=GO:0048869	[]
6	6	striated muscle cell differentiation	GO:0051146	0.042	0.155	0.38	0.03	6.85695	-11.527	CAV2|0.417;CDH2|1.906;SIK1|1.694	3	221	76	21829	http://www.ebi.ac.uk/QuickGO/GTerm?id=GO:0051146	[]
5	5	response to carbohydrate	GO:0009743	0.0426	0.157	0.65	0.16	6.85695	-11.527	EGR1|2.376;IRS2|1.866	2	94	76	21829	http://www.ebi.ac.uk/QuickGO/GTerm?id=GO:0009743	[]
4	4	cofactor metabolic process	GO:0051186	0.0426	0.157	-0.06	-0.17	6.85695	-11.527	PANK1|0.639;HKDC1|2.366;PIPOX|1.809;PDK4|0.421	4	377	76	21829	http://www.ebi.ac.uk/QuickGO/GTerm?id=GO:0051186	[]
5	5	purine-containing compound metabolic process	GO:0072521	0.0434	0.157	-1.2	-0.7	6.85695	-11.527	SLC25A25|0.627;PANK1|0.639;PPARGC1A|0.564;HKDC1|2.366;COX7C|0.658	5	552	76	21829	http://www.ebi.ac.uk/QuickGO/GTerm?id=GO:0072521	[]
5	5	nephron epithelium development	GO:0072009	0.0434	0.157	0.1	-0.1	6.85695	-11.527	PROM1|0.467;JAG1|1.703	2	95	76	21829	http://www.ebi.ac.uk/QuickGO/GTerm?id=GO:0072009	[]
6	5,6	regulation of osteoblast differentiation	GO:0045667	0.0434	0.157	0.58	0.13	6.85695	-11.527	CYR61|2.231;JAG1|1.703	2	95	76	21829	http://www.ebi.ac.uk/QuickGO/GTerm?id=GO:0045667	[]
4	4	kidney development	GO:0001822	0.0439	0.157	0.33	0.01	6.85695	-11.527	ADAMTS1|1.877;PROM1|0.467;JAG1|1.703	3	225	76	21829	http://www.ebi.ac.uk/QuickGO/GTerm?id=GO:0001822	[]
5	5	membrane lipid biosynthetic process	GO:0046467	0.0442	0.157	0.11	-0.09	6.85695	-11.527	CERS6|0.346;CYR61|2.231	2	96	76	21829	http://www.ebi.ac.uk/QuickGO/GTerm?id=GO:0046467	[]
5	5	cardiac ventricle development	GO:0003231	0.0442	0.157	0.58	0.13	6.85695	-11.527	CYR61|2.231;JAG1|1.703	2	96	76	21829	http://www.ebi.ac.uk/QuickGO/GTerm?id=GO:0003231	[]
3	3	cell proliferation	GO:0008283	0.0442	0.157	2.71	1.11	6.85695	-11.527	CAV2|0.417;CDH2|1.906;CYR61|2.231;JUN|2.208;TOP2A|0.53;SGK2|0.559;IRS2|1.866;JAG1|1.703;MCC|2.125	9	1349	76	21829	http://www.ebi.ac.uk/QuickGO/GTerm?id=GO:0008283	[]
3	3	regulation of locomotion	GO:0040012	0.0442	0.157	1.45	0.53	6.85695	-11.527	CDH2|1.906;ENPP2|0.6;CYR61|2.231;IRS2|1.866;MCC|2.125	5	555	76	21829	http://www.ebi.ac.uk/QuickGO/GTerm?id=GO:0040012	[]
11	6,8,9,10,11	activation of MAPK activity involved in innate immune response	GO:0035419	0.0443	0.157	0	-0.14	6.85695	-11.527	JUN|2.208	1	13	76	21829	http://www.ebi.ac.uk/QuickGO/GTerm?id=GO:0035419	[]
7	6,7	cysteine metabolic process	GO:0006534	0.0443	0.157	0	-0.14	6.85695	-11.527	CDO1|0.672	1	13	76	21829	http://www.ebi.ac.uk/QuickGO/GTerm?id=GO:0006534	[]
6	6	positive regulation by host of viral transcription	GO:0043923	0.0443	0.157	0	-0.14	6.85695	-11.527	JUN|2.208	1	13	76	21829	http://www.ebi.ac.uk/QuickGO/GTerm?id=GO:0043923	[]
10	9,10	regulation of B cell apoptotic process	GO:0002902	0.0443	0.157	0	-0.14	6.85695	-11.527	IRS2|1.866	1	13	76	21829	http://www.ebi.ac.uk/QuickGO/GTerm?id=GO:0002902	[]
7	6,7	regulation of glucan biosynthetic process	GO:0010962	0.0443	0.157	0	-0.14	6.85695	-11.527	IRS2|1.866	1	13	76	21829	http://www.ebi.ac.uk/QuickGO/GTerm?id=GO:0010962	[]
7	7	cellular response to cadmium ion	GO:0071276	0.0443	0.157	0	-0.14	6.85695	-11.527	FOS|3.316	1	13	76	21829	http://www.ebi.ac.uk/QuickGO/GTerm?id=GO:0071276	[]
7	5,7	negative regulation of anion transport	GO:1903792	0.0443	0.157	0	-0.14	6.85695	-11.527	IRS2|1.866	1	13	76	21829	http://www.ebi.ac.uk/QuickGO/GTerm?id=GO:1903792	[]
10	7,8,9,10	regulation of glycogen biosynthetic process	GO:0005979	0.0443	0.157	0	-0.14	6.85695	-11.527	IRS2|1.866	1	13	76	21829	http://www.ebi.ac.uk/QuickGO/GTerm?id=GO:0005979	[]
6	5,6	resolution of meiotic recombination intermediates	GO:0000712	0.0443	0.157	0	-0.14	6.85695	-11.527	TOP2A|0.53	1	13	76	21829	http://www.ebi.ac.uk/QuickGO/GTerm?id=GO:0000712	[]
8	6,7,8	regulation of fatty acid transport	GO:2000191	0.0443	0.157	0	-0.14	6.85695	-11.527	IRS2|1.866	1	13	76	21829	http://www.ebi.ac.uk/QuickGO/GTerm?id=GO:2000191	[]
7	6,7	cardiac right ventricle morphogenesis	GO:0003215	0.0443	0.157	0	-0.14	6.85695	-11.527	JAG1|1.703	1	13	76	21829	http://www.ebi.ac.uk/QuickGO/GTerm?id=GO:0003215	[]
7	6,7	monosaccharide transport	GO:0015749	0.045	0.159	-0.07	-0.18	6.85695	-11.527	SLC2A2|0.635;IRS2|1.866	2	97	76	21829	http://www.ebi.ac.uk/QuickGO/GTerm?id=GO:0015749	[]
4	4	cell migration	GO:0016477	0.0457	0.161	2.41	0.98	6.85695	-11.527	CDH2|1.906;GFRA3|0.646;ENPP2|0.6;CYR61|2.231;CCK1R|5.905;IRS2|1.866;MCC|2.125	7	943	76	21829	http://www.ebi.ac.uk/QuickGO/GTerm?id=GO:0016477	[]
5	5	alcohol metabolic process	GO:0006066	0.0468	0.165	-0.2	-0.23	6.85695	-11.527	ENPP2|0.6;BCO1|0.596;SLC5A3|1.572	3	231	76	21829	http://www.ebi.ac.uk/QuickGO/GTerm?id=GO:0006066	[]
6	6	postsynaptic membrane assembly	GO:0097104	0.0477	0.166	0	-0.14	6.85695	-11.527	CDH2|1.906	1	14	76	21829	http://www.ebi.ac.uk/QuickGO/GTerm?id=GO:0097104	[]
7	6,7	membrane raft assembly	GO:0001765	0.0477	0.166	0	-0.14	6.85695	-11.527	CAV2|0.417	1	14	76	21829	http://www.ebi.ac.uk/QuickGO/GTerm?id=GO:0001765	[]
8	6,7,8	interleukin-1-mediated signaling pathway	GO:0070498	0.0477	0.166	0	-0.14	6.85695	-11.527	EGR1|2.376	1	14	76	21829	http://www.ebi.ac.uk/QuickGO/GTerm?id=GO:0070498	[]
7	4,5,6,7	regulation of sphingolipid biosynthetic process	GO:0090153	0.0477	0.166	0	-0.14	6.85695	-11.527	CYR61|2.231	1	14	76	21829	http://www.ebi.ac.uk/QuickGO/GTerm?id=GO:0090153	[]
4	4	negative regulation of lipid transport	GO:0032369	0.0477	0.166	0	-0.14	6.85695	-11.527	IRS2|1.866	1	14	76	21829	http://www.ebi.ac.uk/QuickGO/GTerm?id=GO:0032369	[]
5	4,5	multicellular organismal homeostasis	GO:0048871	0.0483	0.168	-0.96	-0.58	6.85695	-11.527	PROM1|0.467;PPARGC1A|0.564;PDK4|0.421	3	234	76	21829	http://www.ebi.ac.uk/QuickGO/GTerm?id=GO:0048871	[]
6	6	Wnt signaling pathway	GO:0016055	0.0487	0.169	1.27	0.45	6.85695	-11.527	CDH2|1.906;EGR1|2.376;ANKRD6|0.513;MCC|2.125	4	394	76	21829	http://www.ebi.ac.uk/QuickGO/GTerm?id=GO:0016055	[]
4	4	regulation of cellular component movement	GO:0051270	0.0492	0.17	1.45	0.53	6.85695	-11.527	CDH2|1.906;ENPP2|0.6;CYR61|2.231;IRS2|1.866;MCC|2.125	5	572	76	21829	http://www.ebi.ac.uk/QuickGO/GTerm?id=GO:0051270	[]
7	7	purine nucleoside biosynthetic process	GO:0042451	0.0493	0.17	-0.44	-0.35	6.85695	-11.527	PANK1|0.639;PPARGC1A|0.564	2	102	76	21829	http://www.ebi.ac.uk/QuickGO/GTerm?id=GO:0042451	[]
8	8	purine ribonucleoside biosynthetic process	GO:0046129	0.0493	0.17	-0.44	-0.35	6.85695	-11.527	PANK1|0.639;PPARGC1A|0.564	2	102	76	21829	http://www.ebi.ac.uk/QuickGO/GTerm?id=GO:0046129	[]
5	5	cardiocyte differentiation	GO:0035051	0.0493	0.17	0.46	0.07	6.85695	-11.527	SIK1|1.694;JAG1|1.703	2	102	76	21829	http://www.ebi.ac.uk/QuickGO/GTerm?id=GO:0035051	[]
7	7	generation of neurons	GO:0048699	0.0499	0.171	2.96	1.23	6.85695	-11.527	LRFN5|1.736;CDH2|1.906;GFRA3|0.646;SDK2|2.638;CCK1R|5.905;CHRDL1|0.429;LPAR3|2.868;JAG1|1.703	8	1168	76	21829	http://www.ebi.ac.uk/QuickGO/GTerm?id=GO:0048699	[]
10	8,9,10	activation of MAPK activity	GO:0000187	0.0501	0.171	0.8	0.23	6.85695	-11.527	JUN|2.208;LPAR3|2.868	2	103	76	21829	http://www.ebi.ac.uk/QuickGO/GTerm?id=GO:0000187	[]
8	7,8	axon development	GO:0061564	0.0505	0.171	1.66	0.63	6.85695	-11.527	LRFN5|1.736;GFRA3|0.646;CCK1R|5.905;LPAR3|2.868	4	399	76	21829	http://www.ebi.ac.uk/QuickGO/GTerm?id=GO:0061564	[]
5	5	renal system development	GO:0072001	0.0509	0.171	0.33	0.01	6.85695	-11.527	ADAMTS1|1.877;PROM1|0.467;JAG1|1.703	3	239	76	21829	http://www.ebi.ac.uk/QuickGO/GTerm?id=GO:0072001	[]
5	5	negative regulation of appetite	GO:0032099	0.051	0.171	0	-0.14	6.85695	-11.527	CRHR2|2.007	1	15	76	21829	http://www.ebi.ac.uk/QuickGO/GTerm?id=GO:0032099	[]
11	8,10,11	toll-like receptor 15 signaling pathway	GO:0035681	0.051	0.171	0	-0.14	6.85695	-11.527	JUN|2.208	1	15	76	21829	http://www.ebi.ac.uk/QuickGO/GTerm?id=GO:0035681	[]
7	6,7	regulation of cAMP-mediated signaling	GO:0043949	0.051	0.171	0	-0.14	6.85695	-11.527	CRHR2|2.007	1	15	76	21829	http://www.ebi.ac.uk/QuickGO/GTerm?id=GO:0043949	[]
5	5	cell surface receptor signaling pathway involved in heart development	GO:0061311	0.051	0.171	0	-0.14	6.85695	-11.527	JAG1|1.703	1	15	76	21829	http://www.ebi.ac.uk/QuickGO/GTerm?id=GO:0061311	[]
8	7,8	negative regulation of anoikis	GO:2000811	0.051	0.171	0	-0.14	6.85695	-11.527	PDK4|0.421	1	15	76	21829	http://www.ebi.ac.uk/QuickGO/GTerm?id=GO:2000811	[]
5	4,5	regulation of respiratory gaseous exchange	GO:0043576	0.051	0.171	0	-0.14	6.85695	-11.527	SLC5A3|1.572	1	15	76	21829	http://www.ebi.ac.uk/QuickGO/GTerm?id=GO:0043576	[]
5	5	negative regulation of response to food	GO:0032096	0.051	0.171	0	-0.14	6.85695	-11.527	CRHR2|2.007	1	15	76	21829	http://www.ebi.ac.uk/QuickGO/GTerm?id=GO:0032096	[]
6	6	regulation of epithelial cell differentiation involved in kidney development	GO:2000696	0.051	0.171	0	-0.14	6.85695	-11.527	PROM1|0.467	1	15	76	21829	http://www.ebi.ac.uk/QuickGO/GTerm?id=GO:2000696	[]
6	5,6	atrioventricular valve morphogenesis	GO:0003181	0.051	0.171	0	-0.14	6.85695	-11.527	CYR61|2.231	1	15	76	21829	http://www.ebi.ac.uk/QuickGO/GTerm?id=GO:0003181	[]
4	4	tissue remodeling	GO:0048771	0.051	0.171	0.14	-0.07	6.85695	-11.527	JAG1|1.703;PDK4|0.421	2	104	76	21829	http://www.ebi.ac.uk/QuickGO/GTerm?id=GO:0048771	[]
7	6,7	negative regulation of apoptotic process	GO:0043066	0.051	0.171	0.62	0.15	6.85695	-11.527	CYR61|2.231;PPARGC1A|0.564;KIAA1324|5.521;IRS2|1.866;PDK4|0.421	5	578	76	21829	http://www.ebi.ac.uk/QuickGO/GTerm?id=GO:0043066	[]
8	8	monovalent inorganic cation homeostasis	GO:0055067	0.0528	0.177	-0.63	-0.43	6.85695	-11.527	SGK2|0.559;PDK4|0.421	2	106	76	21829	http://www.ebi.ac.uk/QuickGO/GTerm?id=GO:0055067	[]
6	5,6	morphogenesis of an epithelium	GO:0002009	0.0528	0.177	1.15	0.39	6.85695	-11.527	CDH2|1.906;CYR61|2.231;ANKRD6|0.513;JAG1|1.703	4	405	76	21829	http://www.ebi.ac.uk/QuickGO/GTerm?id=GO:0002009	[]
6	5,6	negative regulation of programmed cell death	GO:0043069	0.0539	0.179	0.62	0.15	6.85695	-11.527	CYR61|2.231;PPARGC1A|0.564;KIAA1324|5.521;IRS2|1.866;PDK4|0.421	5	587	76	21829	http://www.ebi.ac.uk/QuickGO/GTerm?id=GO:0043069	[]
9	9	B cell apoptotic process	GO:0001783	0.0543	0.179	0	-0.14	6.85695	-11.527	IRS2|1.866	1	16	76	21829	http://www.ebi.ac.uk/QuickGO/GTerm?id=GO:0001783	[]
11	8,10,11	toll-like receptor 5 signaling pathway	GO:0034146	0.0543	0.179	0	-0.14	6.85695	-11.527	JUN|2.208	1	16	76	21829	http://www.ebi.ac.uk/QuickGO/GTerm?id=GO:0034146	[]
7	7	aspartate family amino acid catabolic process	GO:0009068	0.0543	0.179	0	-0.14	6.85695	-11.527	PIPOX|1.809	1	16	76	21829	http://www.ebi.ac.uk/QuickGO/GTerm?id=GO:0009068	[]
5	5	positive regulation of viral transcription	GO:0050434	0.0543	0.179	0	-0.14	6.85695	-11.527	JUN|2.208	1	16	76	21829	http://www.ebi.ac.uk/QuickGO/GTerm?id=GO:0050434	[]
7	6,7	regulation of non-canonical Wnt signaling pathway	GO:2000050	0.0543	0.179	0	-0.14	6.85695	-11.527	ANKRD6|0.513	1	16	76	21829	http://www.ebi.ac.uk/QuickGO/GTerm?id=GO:2000050	[]
5	4,5	meiotic chromosome separation	GO:0051307	0.0543	0.179	0	-0.14	6.85695	-11.527	TOP2A|0.53	1	16	76	21829	http://www.ebi.ac.uk/QuickGO/GTerm?id=GO:0051307	[]
6	6	regulation of polysaccharide biosynthetic process	GO:0032885	0.0543	0.179	0	-0.14	6.85695	-11.527	IRS2|1.866	1	16	76	21829	http://www.ebi.ac.uk/QuickGO/GTerm?id=GO:0032885	[]
6	5,6	Notch signaling pathway	GO:0007219	0.0564	0.185	0.05	-0.12	6.85695	-11.527	CHAC1|0.521;JAG1|1.703	2	110	76	21829	http://www.ebi.ac.uk/QuickGO/GTerm?id=GO:0007219	[]
7	5,6,7	organic acid transmembrane transport	GO:1903825	0.0564	0.185	0.1	-0.09	6.85695	-11.527	IRS2|1.866;SLC6A14|0.423	2	110	76	21829	http://www.ebi.ac.uk/QuickGO/GTerm?id=GO:1903825	[]
8	7,8	positive regulation of osteoclast differentiation	GO:0045672	0.0576	0.185	0	-0.14	6.85695	-11.527	FOS|3.316	1	17	76	21829	http://www.ebi.ac.uk/QuickGO/GTerm?id=GO:0045672	[]
6	5,6	ganglion development	GO:0061548	0.0576	0.185	0	-0.14	6.85695	-11.527	CDH2|1.906	1	17	76	21829	http://www.ebi.ac.uk/QuickGO/GTerm?id=GO:0061548	[]
5	5	atrial septum morphogenesis	GO:0060413	0.0576	0.185	0	-0.14	6.85695	-11.527	CYR61|2.231	1	17	76	21829	http://www.ebi.ac.uk/QuickGO/GTerm?id=GO:0060413	[]
7	6,7	DNA topological change	GO:0006265	0.0576	0.185	0	-0.14	6.85695	-11.527	TOP2A|0.53	1	17	76	21829	http://www.ebi.ac.uk/QuickGO/GTerm?id=GO:0006265	[]
6	6	response to cadmium ion	GO:0046686	0.0576	0.185	0	-0.14	6.85695	-11.527	FOS|3.316	1	17	76	21829	http://www.ebi.ac.uk/QuickGO/GTerm?id=GO:0046686	[]
8	7,8	regulation of anoikis	GO:2000209	0.0576	0.185	0	-0.14	6.85695	-11.527	PDK4|0.421	1	17	76	21829	http://www.ebi.ac.uk/QuickGO/GTerm?id=GO:2000209	[]
7	7	cellular response to gamma radiation	GO:0071480	0.0576	0.185	0	-0.14	6.85695	-11.527	EGR1|2.376	1	17	76	21829	http://www.ebi.ac.uk/QuickGO/GTerm?id=GO:0071480	[]
8	5,8	removal of superoxide radicals	GO:0019430	0.0576	0.185	0	-0.14	6.85695	-11.527	SOD3|0.184	1	17	76	21829	http://www.ebi.ac.uk/QuickGO/GTerm?id=GO:0019430	[]
5	5	presynaptic membrane organization	GO:0097090	0.0576	0.185	0	-0.14	6.85695	-11.527	CDH2|1.906	1	17	76	21829	http://www.ebi.ac.uk/QuickGO/GTerm?id=GO:0097090	[]
4	4	anatomical structure arrangement	GO:0048532	0.0576	0.185	0	-0.14	6.85695	-11.527	CDH2|1.906	1	17	76	21829	http://www.ebi.ac.uk/QuickGO/GTerm?id=GO:0048532	[]
8	7,8	acetyl-CoA biosynthetic process	GO:0006085	0.0576	0.185	0	-0.14	6.85695	-11.527	PDK4|0.421	1	17	76	21829	http://www.ebi.ac.uk/QuickGO/GTerm?id=GO:0006085	[]
4	4	single-organism biosynthetic process	GO:0044711	0.0579	0.186	-1.08	-0.64	6.85695	-11.527	CERS6|0.346;ACSL1|0.614;CYR61|2.231;PANK1|0.639;PPARGC1A|0.564;SIK1|1.694;IRS2|1.866;AGPAT2|1.693;PDK4|0.421	9	1421	76	21829	http://www.ebi.ac.uk/QuickGO/GTerm?id=GO:0044711	[]
4	4	nephron development	GO:0072006	0.0582	0.186	0.1	-0.1	6.85695	-11.527	PROM1|0.467;JAG1|1.703	2	112	76	21829	http://www.ebi.ac.uk/QuickGO/GTerm?id=GO:0072006	[]
4	4	negative regulation of cellular response to growth factor stimulus	GO:0090288	0.0582	0.186	-0.75	-0.49	6.85695	-11.527	CAV2|0.417;CHRDL1|0.429	2	112	76	21829	http://www.ebi.ac.uk/QuickGO/GTerm?id=GO:0090288	[]
4	4	cellular catabolic process	GO:0044248	0.0585	0.187	-0.75	-0.49	6.85695	-11.527	CTSK|2.109;CHAC1|0.521;ENPP2|0.6;ECI2|0.596;MAOA|0.614;KIAA1324|5.521;PIPOX|1.809;IRS2|1.866;RNF144A|2.045;Gga.6352|0.616	10	1645	76	21829	http://www.ebi.ac.uk/QuickGO/GTerm?id=GO:0044248	[]
7	6,7	carboxylic acid transport	GO:0046942	0.0595	0.19	-0.27	-0.27	6.85695	-11.527	ACSL1|0.614;IRS2|1.866;SLC6A14|0.423	3	255	76	21829	http://www.ebi.ac.uk/QuickGO/GTerm?id=GO:0046942	[]
3	3	cell motility	GO:0048870	0.0598	0.19	2.41	0.98	6.85695	-11.527	CDH2|1.906;GFRA3|0.646;ENPP2|0.6;CYR61|2.231;CCK1R|5.905;IRS2|1.866;MCC|2.125	7	1003	76	21829	http://www.ebi.ac.uk/QuickGO/GTerm?id=GO:0048870	[]
5	4,5	positive regulation of catabolic process	GO:0009896	0.06	0.19	1.32	0.47	6.85695	-11.527	KIAA1324|5.521;IRS2|1.866;RNF144A|2.045	3	256	76	21829	http://www.ebi.ac.uk/QuickGO/GTerm?id=GO:0009896	[]
3	3	localization of cell	GO:0051674	0.0601	0.19	2.41	0.98	6.85695	-11.527	CDH2|1.906;GFRA3|0.646;ENPP2|0.6;CYR61|2.231;CCK1R|5.905;IRS2|1.866;MCC|2.125	7	1004	76	21829	http://www.ebi.ac.uk/QuickGO/GTerm?id=GO:0051674	[]
6	5,6	organic acid transport	GO:0015849	0.0606	0.19	-0.27	-0.27	6.85695	-11.527	ACSL1|0.614;IRS2|1.866;SLC6A14|0.423	3	257	76	21829	http://www.ebi.ac.uk/QuickGO/GTerm?id=GO:0015849	[]
5	5	regulation of collateral sprouting	GO:0048670	0.0609	0.19	0	-0.14	6.85695	-11.527	LPAR3|2.868	1	18	76	21829	http://www.ebi.ac.uk/QuickGO/GTerm?id=GO:0048670	[]
6	5,6	regulation of insulin-like growth factor receptor signaling pathway	GO:0043567	0.0609	0.19	0	-0.14	6.85695	-11.527	IGFBP1|0.446	1	18	76	21829	http://www.ebi.ac.uk/QuickGO/GTerm?id=GO:0043567	[]
5	4,5	entrainment of circadian clock	GO:0009649	0.0609	0.19	0	-0.14	6.85695	-11.527	SIK1|1.694	1	18	76	21829	http://www.ebi.ac.uk/QuickGO/GTerm?id=GO:0009649	[]
4	3,4	regulation of developmental pigmentation	GO:0048070	0.0609	0.19	0	-0.14	6.85695	-11.527	ADAMTS9|0.583	1	18	76	21829	http://www.ebi.ac.uk/QuickGO/GTerm?id=GO:0048070	[]
9	5,6,7,8,9	mitotic chromosome condensation	GO:0007076	0.0609	0.19	0	-0.14	6.85695	-11.527	SMC2|0.493	1	18	76	21829	http://www.ebi.ac.uk/QuickGO/GTerm?id=GO:0007076	[]
5	5	response to muscle stretch	GO:0035994	0.0609	0.19	0	-0.14	6.85695	-11.527	FOS|3.316	1	18	76	21829	http://www.ebi.ac.uk/QuickGO/GTerm?id=GO:0035994	[]
5	5	atrioventricular valve development	GO:0003171	0.0609	0.19	0	-0.14	6.85695	-11.527	CYR61|2.231	1	18	76	21829	http://www.ebi.ac.uk/QuickGO/GTerm?id=GO:0003171	[]
9	8,9	regulation of protein sumoylation	GO:0033233	0.0609	0.19	0	-0.14	6.85695	-11.527	EGR1|2.376	1	18	76	21829	http://www.ebi.ac.uk/QuickGO/GTerm?id=GO:0033233	[]
6	5,6	bone growth	GO:0098868	0.0609	0.19	0	-0.14	6.85695	-11.527	EVC|0.468	1	18	76	21829	http://www.ebi.ac.uk/QuickGO/GTerm?id=GO:0098868	[]
5	5	sensory organ morphogenesis	GO:0090596	0.0617	0.192	0.33	0.01	6.85695	-11.527	PROM1|0.467;SDK2|2.638;JAG1|1.703	3	259	76	21829	http://www.ebi.ac.uk/QuickGO/GTerm?id=GO:0090596	[]
6	5,6	mitotic nuclear division	GO:0007067	0.0623	0.193	-1.02	-0.62	6.85695	-11.527	CAV2|0.417;SMC2|0.493;MZT1|0.461	3	260	76	21829	http://www.ebi.ac.uk/QuickGO/GTerm?id=GO:0007067	[]
5	5	organonitrogen compound catabolic process	GO:1901565	0.0626	0.194	-0.18	-0.22	6.85695	-11.527	CTSK|2.109;CHAC1|0.521;ENPP2|0.6;MAOA|0.614;PIPOX|1.809;RNF144A|2.045	6	809	76	21829	http://www.ebi.ac.uk/QuickGO/GTerm?id=GO:1901565	[]
3	3	response to stress	GO:0006950	0.0636	0.194	-6.71	-3.25	6.85695	-11.527	SOD3|0.184;CHAC1|0.521;CYR61|2.231;EGR1|2.376;JUN|2.208;PPARGC1A|0.564;TOP2A|0.53;FOS|3.316;WFDC1|0.417;GPX2|7.618;KIAA1324|5.521;TRPA1|0.123;ANKRD6|0.513;PDK4|0.421	14	2601	76	21829	http://www.ebi.ac.uk/QuickGO/GTerm?id=GO:0006950	[]
5	5	sphingolipid metabolic process	GO:0006665	0.0638	0.194	0.11	-0.09	6.85695	-11.527	CERS6|0.346;CYR61|2.231	2	118	76	21829	http://www.ebi.ac.uk/QuickGO/GTerm?id=GO:0006665	[]
11	5,8,9,11	camera-type eye photoreceptor cell differentiation	GO:0060219	0.0641	0.194	0	-0.14	6.85695	-11.527	SDK2|2.638	1	19	76	21829	http://www.ebi.ac.uk/QuickGO/GTerm?id=GO:0060219	[]
7	7	cellular response to superoxide	GO:0071451	0.0641	0.194	0	-0.14	6.85695	-11.527	SOD3|0.184	1	19	76	21829	http://www.ebi.ac.uk/QuickGO/GTerm?id=GO:0071451	[]
11	8,10,11	toll-like receptor 7 signaling pathway	GO:0034154	0.0641	0.194	0	-0.14	6.85695	-11.527	JUN|2.208	1	19	76	21829	http://www.ebi.ac.uk/QuickGO/GTerm?id=GO:0034154	[]
7	5,6,7	positive regulation of G-protein coupled receptor protein signaling pathway	GO:0045745	0.0641	0.194	0	-0.14	6.85695	-11.527	CAV2|0.417	1	19	76	21829	http://www.ebi.ac.uk/QuickGO/GTerm?id=GO:0045745	[]
5	5	sympathetic nervous system development	GO:0048485	0.0641	0.194	0	-0.14	6.85695	-11.527	GFRA3|0.646	1	19	76	21829	http://www.ebi.ac.uk/QuickGO/GTerm?id=GO:0048485	[]
5	5	regulation of osteoblast proliferation	GO:0033688	0.0641	0.194	0	-0.14	6.85695	-11.527	CYR61|2.231	1	19	76	21829	http://www.ebi.ac.uk/QuickGO/GTerm?id=GO:0033688	[]
6	6	cellular response to oxygen radical	GO:0071450	0.0641	0.194	0	-0.14	6.85695	-11.527	SOD3|0.184	1	19	76	21829	http://www.ebi.ac.uk/QuickGO/GTerm?id=GO:0071450	[]
6	5,6	atrial septum development	GO:0003283	0.0641	0.194	0	-0.14	6.85695	-11.527	CYR61|2.231	1	19	76	21829	http://www.ebi.ac.uk/QuickGO/GTerm?id=GO:0003283	[]
6	5,6	regulation of triglyceride metabolic process	GO:0090207	0.0641	0.194	0	-0.14	6.85695	-11.527	SIK1|1.694	1	19	76	21829	http://www.ebi.ac.uk/QuickGO/GTerm?id=GO:0090207	[]
7	5,7	regulation of response to food	GO:0032095	0.0641	0.194	0	-0.14	6.85695	-11.527	CRHR2|2.007	1	19	76	21829	http://www.ebi.ac.uk/QuickGO/GTerm?id=GO:0032095	[]
7	5,7	retinol metabolic process	GO:0042572	0.0641	0.194	0	-0.14	6.85695	-11.527	BCO1|0.596	1	19	76	21829	http://www.ebi.ac.uk/QuickGO/GTerm?id=GO:0042572	[]
8	6,8	regulation of endothelial cell differentiation	GO:0045601	0.0641	0.194	0	-0.14	6.85695	-11.527	JAG1|1.703	1	19	76	21829	http://www.ebi.ac.uk/QuickGO/GTerm?id=GO:0045601	[]
10	8,9,10	negative regulation of lymphocyte apoptotic process	GO:0070229	0.0641	0.194	0	-0.14	6.85695	-11.527	IRS2|1.866	1	19	76	21829	http://www.ebi.ac.uk/QuickGO/GTerm?id=GO:0070229	[]
2	2	locomotion	GO:0040011	0.0647	0.195	2.79	1.15	6.85695	-11.527	CAV2|0.417;CDH2|1.906;GFRA3|0.646;ENPP2|0.6;CYR61|2.231;CCK1R|5.905;IRS2|1.866;MCC|2.125	8	1234	76	21829	http://www.ebi.ac.uk/QuickGO/GTerm?id=GO:0040011	[]
5	5	synapse assembly	GO:0007416	0.0647	0.195	0.7	0.18	6.85695	-11.527	CDH2|1.906;SDK2|2.638	2	119	76	21829	http://www.ebi.ac.uk/QuickGO/GTerm?id=GO:0007416	[]
5	5	glycerolipid biosynthetic process	GO:0045017	0.0647	0.195	0.46	0.07	6.85695	-11.527	SIK1|1.694;AGPAT2|1.693	2	119	76	21829	http://www.ebi.ac.uk/QuickGO/GTerm?id=GO:0045017	[]
5	5	cell-cell signaling by wnt	GO:0198738	0.0652	0.196	0.29	-0.01	6.85695	-11.527	CDH2|1.906;ANKRD6|0.513;MCC|2.125	3	265	76	21829	http://www.ebi.ac.uk/QuickGO/GTerm?id=GO:0198738	[]
10	9,10	glucose transmembrane transport	GO:1904659	0.0674	0.199	0	-0.14	6.85695	-11.527	SLC2A2|0.635	1	20	76	21829	http://www.ebi.ac.uk/QuickGO/GTerm?id=GO:1904659	[]
6	5,6	positive regulation of lipid catabolic process	GO:0050996	0.0674	0.199	0	-0.14	6.85695	-11.527	IRS2|1.866	1	20	76	21829	http://www.ebi.ac.uk/QuickGO/GTerm?id=GO:0050996	[]
7	6,7	regulation of fatty acid biosynthetic process	GO:0042304	0.0674	0.199	0	-0.14	6.85695	-11.527	PDK4|0.421	1	20	76	21829	http://www.ebi.ac.uk/QuickGO/GTerm?id=GO:0042304	[]
7	6,7	DNA ligation	GO:0006266	0.0674	0.199	0	-0.14	6.85695	-11.527	TOP2A|0.53	1	20	76	21829	http://www.ebi.ac.uk/QuickGO/GTerm?id=GO:0006266	[]
6	6	cellular response to fatty acid	GO:0071398	0.0674	0.199	0	-0.14	6.85695	-11.527	PDK4|0.421	1	20	76	21829	http://www.ebi.ac.uk/QuickGO/GTerm?id=GO:0071398	[]
9	6,7,8,9	regulation of glycogen metabolic process	GO:0070873	0.0674	0.199	0	-0.14	6.85695	-11.527	IRS2|1.866	1	20	76	21829	http://www.ebi.ac.uk/QuickGO/GTerm?id=GO:0070873	[]
4	4	trabecula formation	GO:0060343	0.0674	0.199	0	-0.14	6.85695	-11.527	ADAMTS1|1.877	1	20	76	21829	http://www.ebi.ac.uk/QuickGO/GTerm?id=GO:0060343	[]
7	7	triglyceride biosynthetic process	GO:0019432	0.0674	0.199	0	-0.14	6.85695	-11.527	SIK1|1.694	1	20	76	21829	http://www.ebi.ac.uk/QuickGO/GTerm?id=GO:0019432	[]
6	5,6	energy homeostasis	GO:0097009	0.0674	0.199	0	-0.14	6.85695	-11.527	PPARGC1A|0.564	1	20	76	21829	http://www.ebi.ac.uk/QuickGO/GTerm?id=GO:0097009	[]
8	5,8	neuron migration	GO:0001764	0.0676	0.199	-0.58	-0.41	6.85695	-11.527	GFRA3|0.646;CCK1R|5.905	2	122	76	21829	http://www.ebi.ac.uk/QuickGO/GTerm?id=GO:0001764	[]
6	5,6	carbohydrate transport	GO:0008643	0.0676	0.199	-0.07	-0.18	6.85695	-11.527	SLC2A2|0.635;IRS2|1.866	2	122	76	21829	http://www.ebi.ac.uk/QuickGO/GTerm?id=GO:0008643	[]
5	5	muscle organ development	GO:0007517	0.0687	0.202	0.38	0.03	6.85695	-11.527	CAV2|0.417;EGR1|2.376;FOS|3.316	3	271	76	21829	http://www.ebi.ac.uk/QuickGO/GTerm?id=GO:0007517	[]
4	4	heart development	GO:0007507	0.0688	0.202	1.08	0.36	6.85695	-11.527	ADAMTS1|1.877;CYR61|2.231;SIK1|1.694;JAG1|1.703	4	443	76	21829	http://www.ebi.ac.uk/QuickGO/GTerm?id=GO:0007507	[]
5	5	urogenital system development	GO:0001655	0.0693	0.202	0.33	0.01	6.85695	-11.527	ADAMTS1|1.877;PROM1|0.467;JAG1|1.703	3	272	76	21829	http://www.ebi.ac.uk/QuickGO/GTerm?id=GO:0001655	[]
6	4,6	positive regulation of hemopoiesis	GO:1903708	0.0695	0.202	0.75	0.21	6.85695	-11.527	FOS|3.316;JAG1|1.703	2	124	76	21829	http://www.ebi.ac.uk/QuickGO/GTerm?id=GO:1903708	[]
5	4,5	negative regulation of cell death	GO:0060548	0.0701	0.202	0.62	0.15	6.85695	-11.527	CYR61|2.231;PPARGC1A|0.564;KIAA1324|5.521;IRS2|1.866;PDK4|0.421	5	634	76	21829	http://www.ebi.ac.uk/QuickGO/GTerm?id=GO:0060548	[]
4	4	ammonium ion metabolic process	GO:0097164	0.0705	0.202	-0.43	-0.34	6.85695	-11.527	ENPP2|0.6;MAOA|0.614	2	125	76	21829	http://www.ebi.ac.uk/QuickGO/GTerm?id=GO:0097164	[]
8	7,8	monocarboxylic acid transport	GO:0015718	0.0705	0.202	-0.06	-0.17	6.85695	-11.527	ACSL1|0.614;IRS2|1.866	2	125	76	21829	http://www.ebi.ac.uk/QuickGO/GTerm?id=GO:0015718	[]
6	5,6	kidney epithelium development	GO:0072073	0.0705	0.202	0.1	-0.1	6.85695	-11.527	PROM1|0.467;JAG1|1.703	2	125	76	21829	http://www.ebi.ac.uk/QuickGO/GTerm?id=GO:0072073	[]
5	5	glycerolipid metabolic process	GO:0046486	0.0705	0.202	0.22	-0.04	6.85695	-11.527	ENPP2|0.6;SIK1|1.694;AGPAT2|1.693	3	274	76	21829	http://www.ebi.ac.uk/QuickGO/GTerm?id=GO:0046486	[]
4	4	apoptotic process involved in morphogenesis	GO:0060561	0.0707	0.202	0	-0.14	6.85695	-11.527	CYR61|2.231	1	21	76	21829	http://www.ebi.ac.uk/QuickGO/GTerm?id=GO:0060561	[]
8	6,7,8	modulation by host of viral transcription	GO:0043921	0.0707	0.202	0	-0.14	6.85695	-11.527	JUN|2.208	1	21	76	21829	http://www.ebi.ac.uk/QuickGO/GTerm?id=GO:0043921	[]
7	6,7	modulation by host of symbiont transcription	GO:0052472	0.0707	0.202	0	-0.14	6.85695	-11.527	JUN|2.208	1	21	76	21829	http://www.ebi.ac.uk/QuickGO/GTerm?id=GO:0052472	[]
5	5	neutral lipid biosynthetic process	GO:0046460	0.0707	0.202	0	-0.14	6.85695	-11.527	SIK1|1.694	1	21	76	21829	http://www.ebi.ac.uk/QuickGO/GTerm?id=GO:0046460	[]
9	7,8,9	coenzyme A biosynthetic process	GO:0015937	0.0707	0.202	0	-0.14	6.85695	-11.527	PANK1|0.639	1	21	76	21829	http://www.ebi.ac.uk/QuickGO/GTerm?id=GO:0015937	[]
6	6	aorta morphogenesis	GO:0035909	0.0707	0.202	0	-0.14	6.85695	-11.527	JAG1|1.703	1	21	76	21829	http://www.ebi.ac.uk/QuickGO/GTerm?id=GO:0035909	[]
6	6	response to superoxide	GO:0000303	0.0707	0.202	0	-0.14	6.85695	-11.527	SOD3|0.184	1	21	76	21829	http://www.ebi.ac.uk/QuickGO/GTerm?id=GO:0000303	[]
4	4	osteoblast proliferation	GO:0033687	0.0707	0.202	0	-0.14	6.85695	-11.527	CYR61|2.231	1	21	76	21829	http://www.ebi.ac.uk/QuickGO/GTerm?id=GO:0033687	[]
6	6	acylglycerol biosynthetic process	GO:0046463	0.0707	0.202	0	-0.14	6.85695	-11.527	SIK1|1.694	1	21	76	21829	http://www.ebi.ac.uk/QuickGO/GTerm?id=GO:0046463	[]
6	6	modulation of transcription in other organism involved in symbiotic interaction	GO:0052312	0.0707	0.202	0	-0.14	6.85695	-11.527	JUN|2.208	1	21	76	21829	http://www.ebi.ac.uk/QuickGO/GTerm?id=GO:0052312	[]
7	5,6,7	regulation of organic acid transport	GO:0032890	0.0707	0.202	0	-0.14	6.85695	-11.527	IRS2|1.866	1	21	76	21829	http://www.ebi.ac.uk/QuickGO/GTerm?id=GO:0032890	[]
6	5,6	smoothened signaling pathway	GO:0007224	0.0725	0.206	-0.75	-0.49	6.85695	-11.527	EVC|0.468;EVC2|0.376	2	127	76	21829	http://www.ebi.ac.uk/QuickGO/GTerm?id=GO:0007224	[]
7	7	DNA packaging	GO:0006323	0.0734	0.207	-0.58	-0.41	6.85695	-11.527	TOP2A|0.53;SMC2|0.493	2	128	76	21829	http://www.ebi.ac.uk/QuickGO/GTerm?id=GO:0006323	[]
6	6	epithelial cell differentiation	GO:0030855	0.0738	0.207	0.05	-0.12	6.85695	-11.527	ADAMTS9|0.583;CDH2|1.906;PROM1|0.467;JAG1|1.703	4	454	76	21829	http://www.ebi.ac.uk/QuickGO/GTerm?id=GO:0030855	[]
7	5,6,7	negative regulation of Notch signaling pathway	GO:0045746	0.0739	0.207	0	-0.14	6.85695	-11.527	CHAC1|0.521	1	22	76	21829	http://www.ebi.ac.uk/QuickGO/GTerm?id=GO:0045746	[]
5	5	response to oxygen radical	GO:0000305	0.0739	0.207	0	-0.14	6.85695	-11.527	SOD3|0.184	1	22	76	21829	http://www.ebi.ac.uk/QuickGO/GTerm?id=GO:0000305	[]
9	6,8,9	epiboly involved in wound healing	GO:0090505	0.0739	0.207	0	-0.14	6.85695	-11.527	CYR61|2.231	1	22	76	21829	http://www.ebi.ac.uk/QuickGO/GTerm?id=GO:0090505	[]
6	5,6	detection of mechanical stimulus involved in sensory perception	GO:0050974	0.0739	0.207	0	-0.14	6.85695	-11.527	TRPA1|0.123	1	22	76	21829	http://www.ebi.ac.uk/QuickGO/GTerm?id=GO:0050974	[]
7	6,7	mitochondrial DNA metabolic process	GO:0032042	0.0739	0.207	0	-0.14	6.85695	-11.527	PPARGC1A|0.564	1	22	76	21829	http://www.ebi.ac.uk/QuickGO/GTerm?id=GO:0032042	[]
5	5	wound healing, spreading of cells	GO:0044319	0.0739	0.207	0	-0.14	6.85695	-11.527	CYR61|2.231	1	22	76	21829	http://www.ebi.ac.uk/QuickGO/GTerm?id=GO:0044319	[]
10	5,6,7,8,9,10	microtubule nucleation	GO:0007020	0.0739	0.207	0	-0.14	6.85695	-11.527	MZT1|0.461	1	22	76	21829	http://www.ebi.ac.uk/QuickGO/GTerm?id=GO:0007020	[]
8	7,8	epiboly	GO:0090504	0.0739	0.207	0	-0.14	6.85695	-11.527	CYR61|2.231	1	22	76	21829	http://www.ebi.ac.uk/QuickGO/GTerm?id=GO:0090504	[]
6	5,6	membrane raft organization	GO:0031579	0.0739	0.207	0	-0.14	6.85695	-11.527	CAV2|0.417	1	22	76	21829	http://www.ebi.ac.uk/QuickGO/GTerm?id=GO:0031579	[]
8	6,8	neuron differentiation	GO:0030182	0.0744	0.208	2.68	1.1	6.85695	-11.527	LRFN5|1.736;GFRA3|0.646;SDK2|2.638;CCK1R|5.905;CHRDL1|0.429;LPAR3|2.868;JAG1|1.703	7	1056	76	21829	http://www.ebi.ac.uk/QuickGO/GTerm?id=GO:0030182	[]
4	4	regulation of cellular component organization	GO:0051128	0.0748	0.209	-2.17	-1.15	6.85695	-11.527	CAV2|0.417;CDH2|1.906;CYR61|2.231;JUN|2.208;PPARGC1A|0.564;IGFBP1|0.446;WFDC1|0.417;KIAA1324|5.521;OSCP1|0.14;SGK2|0.559;LPAR3|2.868	11	1953	76	21829	http://www.ebi.ac.uk/QuickGO/GTerm?id=GO:0051128	[]
6	6	nucleoside biosynthetic process	GO:0009163	0.0754	0.21	-0.44	-0.35	6.85695	-11.527	PANK1|0.639;PPARGC1A|0.564	2	130	76	21829	http://www.ebi.ac.uk/QuickGO/GTerm?id=GO:0009163	[]
7	7	ribonucleoside biosynthetic process	GO:0042455	0.0754	0.21	-0.44	-0.35	6.85695	-11.527	PANK1|0.639;PPARGC1A|0.564	2	130	76	21829	http://www.ebi.ac.uk/QuickGO/GTerm?id=GO:0042455	[]
6	4,6	response to hypoxia	GO:0001666	0.0764	0.21	0.36	0.02	6.85695	-11.527	SOD3|0.184;EGR1|2.376	2	131	76	21829	http://www.ebi.ac.uk/QuickGO/GTerm?id=GO:0001666	[]
5	5	epithelium development	GO:0060429	0.0765	0.21	0	-0.14	6.85695	-11.527	ADAMTS9|0.583;CDH2|1.906;PROM1|0.467;CYR61|2.231;ANKRD6|0.513;JAG1|1.703	6	853	76	21829	http://www.ebi.ac.uk/QuickGO/GTerm?id=GO:0060429	[]
6	5,6	regulation of polysaccharide metabolic process	GO:0032881	0.0771	0.21	0	-0.14	6.85695	-11.527	IRS2|1.866	1	23	76	21829	http://www.ebi.ac.uk/QuickGO/GTerm?id=GO:0032881	[]
7	7	purine nucleoside bisphosphate biosynthetic process	GO:0034033	0.0771	0.21	0	-0.14	6.85695	-11.527	PANK1|0.639	1	23	76	21829	http://www.ebi.ac.uk/QuickGO/GTerm?id=GO:0034033	[]
6	5,6	regulation of autophagosome assembly	GO:2000785	0.0771	0.21	0	-0.14	6.85695	-11.527	KIAA1324|5.521	1	23	76	21829	http://www.ebi.ac.uk/QuickGO/GTerm?id=GO:2000785	[]
8	7,8	ribonucleoside bisphosphate biosynthetic process	GO:0034030	0.0771	0.21	0	-0.14	6.85695	-11.527	PANK1|0.639	1	23	76	21829	http://www.ebi.ac.uk/QuickGO/GTerm?id=GO:0034030	[]
6	6	cellular modified amino acid catabolic process	GO:0042219	0.0771	0.21	0	-0.14	6.85695	-11.527	CHAC1|0.521	1	23	76	21829	http://www.ebi.ac.uk/QuickGO/GTerm?id=GO:0042219	[]
7	7	negative regulation of protein processing	GO:0010955	0.0771	0.21	0	-0.14	6.85695	-11.527	CHAC1|0.521	1	23	76	21829	http://www.ebi.ac.uk/QuickGO/GTerm?id=GO:0010955	[]
7	6,7	negative regulation of protein maturation	GO:1903318	0.0771	0.21	0	-0.14	6.85695	-11.527	CHAC1|0.521	1	23	76	21829	http://www.ebi.ac.uk/QuickGO/GTerm?id=GO:1903318	[]
5	5	collateral sprouting	GO:0048668	0.0771	0.21	0	-0.14	6.85695	-11.527	LPAR3|2.868	1	23	76	21829	http://www.ebi.ac.uk/QuickGO/GTerm?id=GO:0048668	[]
13	8,9,10,11,12,13	inactivation of MAPK activity	GO:0000188	0.0771	0.21	0	-0.14	6.85695	-11.527	DUSP8|1.567	1	23	76	21829	http://www.ebi.ac.uk/QuickGO/GTerm?id=GO:0000188	[]
7	6,7	nucleoside bisphosphate biosynthetic process	GO:0033866	0.0771	0.21	0	-0.14	6.85695	-11.527	PANK1|0.639	1	23	76	21829	http://www.ebi.ac.uk/QuickGO/GTerm?id=GO:0033866	[]
5	5	response to pain	GO:0048265	0.0771	0.21	0	-0.14	6.85695	-11.527	TRPA1|0.123	1	23	76	21829	http://www.ebi.ac.uk/QuickGO/GTerm?id=GO:0048265	[]
6	6	transforming growth factor beta receptor signaling pathway	GO:0007179	0.0774	0.211	-0.14	-0.21	6.85695	-11.527	CAV2|0.417;FOS|3.316	2	132	76	21829	http://www.ebi.ac.uk/QuickGO/GTerm?id=GO:0007179	[]
5	5	response to decreased oxygen levels	GO:0036293	0.0774	0.211	0.36	0.02	6.85695	-11.527	SOD3|0.184;EGR1|2.376	2	132	76	21829	http://www.ebi.ac.uk/QuickGO/GTerm?id=GO:0036293	[]
4	4	cell-cell signaling	GO:0007267	0.0777	0.211	2.6	1.06	6.85695	-11.527	RIC3|0.491;CDH2|1.906;CYR61|2.231;CCK1R|5.905;IRS2|1.866;ANKRD6|0.513;MCC|2.125	7	1067	76	21829	http://www.ebi.ac.uk/QuickGO/GTerm?id=GO:0007267	[]
6	5,6	glycosyl compound biosynthetic process	GO:1901659	0.0785	0.212	-0.44	-0.35	6.85695	-11.527	PANK1|0.639;PPARGC1A|0.564	2	133	76	21829	http://www.ebi.ac.uk/QuickGO/GTerm?id=GO:1901659	[]
6	6	nucleobase-containing compound transport	GO:0015931	0.0785	0.212	-0.53	-0.39	6.85695	-11.527	SIDT1|5.384;SLC25A25|0.627	2	133	76	21829	http://www.ebi.ac.uk/QuickGO/GTerm?id=GO:0015931	[]
7	6,7	cell morphogenesis involved in neuron differentiation	GO:0048667	0.0785	0.212	1.66	0.63	6.85695	-11.527	LRFN5|1.736;GFRA3|0.646;CCK1R|5.905;LPAR3|2.868	4	464	76	21829	http://www.ebi.ac.uk/QuickGO/GTerm?id=GO:0048667	[]
4	4	cellular response to extracellular stimulus	GO:0031668	0.0786	0.212	0.38	0.03	6.85695	-11.527	FOS|3.316;KIAA1324|5.521;PDK4|0.421	3	287	76	21829	http://www.ebi.ac.uk/QuickGO/GTerm?id=GO:0031668	[]
4	4	cellular response to stress	GO:0033554	0.0794	0.213	-3.85	-1.93	6.85695	-11.527	SOD3|0.184;CHAC1|0.521;EGR1|2.376;PPARGC1A|0.564;TOP2A|0.53;FOS|3.316;KIAA1324|5.521;ANKRD6|0.513;PDK4|0.421	9	1514	76	21829	http://www.ebi.ac.uk/QuickGO/GTerm?id=GO:0033554	[]
3	3	circadian rhythm	GO:0007623	0.0795	0.213	0.02	-0.13	6.85695	-11.527	PPARGC1A|0.564;SIK1|1.694	2	134	76	21829	http://www.ebi.ac.uk/QuickGO/GTerm?id=GO:0007623	[]
9	6,9	apoptotic nuclear changes	GO:0030262	0.0803	0.213	0	-0.14	6.85695	-11.527	TOP2A|0.53	1	24	76	21829	http://www.ebi.ac.uk/QuickGO/GTerm?id=GO:0030262	[]
4	4	retina layer formation	GO:0010842	0.0803	0.213	0	-0.14	6.85695	-11.527	SDK2|2.638	1	24	76	21829	http://www.ebi.ac.uk/QuickGO/GTerm?id=GO:0010842	[]
6	5,6	negative regulation of signal transduction in absence of ligand	GO:1901099	0.0803	0.213	0	-0.14	6.85695	-11.527	KIAA1324|5.521	1	24	76	21829	http://www.ebi.ac.uk/QuickGO/GTerm?id=GO:1901099	[]
6	6	cellular protein complex localization	GO:0034629	0.0803	0.213	0	-0.14	6.85695	-11.527	MZT1|0.461	1	24	76	21829	http://www.ebi.ac.uk/QuickGO/GTerm?id=GO:0034629	[]
9	6,7,8,9	positive regulation of glucose metabolic process	GO:0010907	0.0803	0.213	0	-0.14	6.85695	-11.527	IRS2|1.866	1	24	76	21829	http://www.ebi.ac.uk/QuickGO/GTerm?id=GO:0010907	[]
6	6	glycerolipid catabolic process	GO:0046503	0.0803	0.213	0	-0.14	6.85695	-11.527	ENPP2|0.6	1	24	76	21829	http://www.ebi.ac.uk/QuickGO/GTerm?id=GO:0046503	[]
7	6,7	negative regulation of extrinsic apoptotic signaling pathway in absence of ligand	GO:2001240	0.0803	0.213	0	-0.14	6.85695	-11.527	KIAA1324|5.521	1	24	76	21829	http://www.ebi.ac.uk/QuickGO/GTerm?id=GO:2001240	[]
9	9	sodium ion homeostasis	GO:0055078	0.0803	0.213	0	-0.14	6.85695	-11.527	SGK2|0.559	1	24	76	21829	http://www.ebi.ac.uk/QuickGO/GTerm?id=GO:0055078	[]
7	4,5,6,7	regulation of bone resorption	GO:0045124	0.0803	0.213	0	-0.14	6.85695	-11.527	PDK4|0.421	1	24	76	21829	http://www.ebi.ac.uk/QuickGO/GTerm?id=GO:0045124	[]
11	5,7,10,11	positive regulation of glucose import	GO:0046326	0.0803	0.213	0	-0.14	6.85695	-11.527	IRS2|1.866	1	24	76	21829	http://www.ebi.ac.uk/QuickGO/GTerm?id=GO:0046326	[]
4	4	cranial nerve morphogenesis	GO:0021602	0.0803	0.213	0	-0.14	6.85695	-11.527	CDH2|1.906	1	24	76	21829	http://www.ebi.ac.uk/QuickGO/GTerm?id=GO:0021602	[]
7	6,7	endochondral bone growth	GO:0003416	0.0803	0.213	0	-0.14	6.85695	-11.527	EVC|0.468	1	24	76	21829	http://www.ebi.ac.uk/QuickGO/GTerm?id=GO:0003416	[]
6	6	coenzyme biosynthetic process	GO:0009108	0.0815	0.215	-0.57	-0.41	6.85695	-11.527	PANK1|0.639;PDK4|0.421	2	136	76	21829	http://www.ebi.ac.uk/QuickGO/GTerm?id=GO:0009108	[]
4	4	stem cell population maintenance	GO:0019827	0.0825	0.217	0.51	0.1	6.85695	-11.527	CDH2|1.906;JAG1|1.703	2	137	76	21829	http://www.ebi.ac.uk/QuickGO/GTerm?id=GO:0019827	[]
4	4	retina development in camera-type eye	GO:0060041	0.0825	0.217	-0.09	-0.18	6.85695	-11.527	PROM1|0.467;SDK2|2.638	2	137	76	21829	http://www.ebi.ac.uk/QuickGO/GTerm?id=GO:0060041	[]
7	6,7	acyl-CoA biosynthetic process	GO:0071616	0.0835	0.218	0	-0.14	6.85695	-11.527	PDK4|0.421	1	25	76	21829	http://www.ebi.ac.uk/QuickGO/GTerm?id=GO:0071616	[]
5	5	thioester biosynthetic process	GO:0035384	0.0835	0.218	0	-0.14	6.85695	-11.527	PDK4|0.421	1	25	76	21829	http://www.ebi.ac.uk/QuickGO/GTerm?id=GO:0035384	[]
5	5	response to fatty acid	GO:0070542	0.0835	0.218	0	-0.14	6.85695	-11.527	PDK4|0.421	1	25	76	21829	http://www.ebi.ac.uk/QuickGO/GTerm?id=GO:0070542	[]
8	5,8	cellular component disassembly involved in execution phase of apoptosis	GO:0006921	0.0835	0.218	0	-0.14	6.85695	-11.527	TOP2A|0.53	1	25	76	21829	http://www.ebi.ac.uk/QuickGO/GTerm?id=GO:0006921	[]
7	6,7	nucleotide transport	GO:0006862	0.0835	0.218	0	-0.14	6.85695	-11.527	SLC25A25|0.627	1	25	76	21829	http://www.ebi.ac.uk/QuickGO/GTerm?id=GO:0006862	[]
4	4	response to oxygen levels	GO:0070482	0.0836	0.218	0.36	0.02	6.85695	-11.527	SOD3|0.184;EGR1|2.376	2	138	76	21829	http://www.ebi.ac.uk/QuickGO/GTerm?id=GO:0070482	[]
4	4	single-organism carbohydrate metabolic process	GO:0044723	0.0854	0.222	1.45	0.53	6.85695	-11.527	HKDC1|2.366;SIK1|1.694;IRS2|1.866;SLC5A3|1.572;PDK4|0.421	5	673	76	21829	http://www.ebi.ac.uk/QuickGO/GTerm?id=GO:0044723	[]
3	3	maintenance of cell number	GO:0098727	0.0856	0.222	0.51	0.1	6.85695	-11.527	CDH2|1.906;JAG1|1.703	2	140	76	21829	http://www.ebi.ac.uk/QuickGO/GTerm?id=GO:0098727	[]
4	4	ossification	GO:0001503	0.0864	0.222	1.07	0.35	6.85695	-11.527	CYR61|2.231;KL|3.059;JAG1|1.703	3	299	76	21829	http://www.ebi.ac.uk/QuickGO/GTerm?id=GO:0001503	[]
5	5	regulation of myeloid cell differentiation	GO:0045637	0.0867	0.222	0.75	0.21	6.85695	-11.527	FOS|3.316;JAG1|1.703	2	141	76	21829	http://www.ebi.ac.uk/QuickGO/GTerm?id=GO:0045637	[]
5	5	heart trabecula morphogenesis	GO:0061384	0.0867	0.222	0	-0.14	6.85695	-11.527	ADAMTS1|1.877	1	26	76	21829	http://www.ebi.ac.uk/QuickGO/GTerm?id=GO:0061384	[]
6	6	primary alcohol metabolic process	GO:0034308	0.0867	0.222	0	-0.14	6.85695	-11.527	BCO1|0.596	1	26	76	21829	http://www.ebi.ac.uk/QuickGO/GTerm?id=GO:0034308	[]
6	6	coenzyme A metabolic process	GO:0015936	0.0867	0.222	0	-0.14	6.85695	-11.527	PANK1|0.639	1	26	76	21829	http://www.ebi.ac.uk/QuickGO/GTerm?id=GO:0015936	[]
7	6,7	negative regulation of response to nutrient levels	GO:0032108	0.0867	0.222	0	-0.14	6.85695	-11.527	CRHR2|2.007	1	26	76	21829	http://www.ebi.ac.uk/QuickGO/GTerm?id=GO:0032108	[]
7	5,7	positive regulation of sodium ion transport	GO:0010765	0.0867	0.222	0	-0.14	6.85695	-11.527	SGK2|0.559	1	26	76	21829	http://www.ebi.ac.uk/QuickGO/GTerm?id=GO:0010765	[]
5	5	sulfur compound catabolic process	GO:0044273	0.0867	0.222	0	-0.14	6.85695	-11.527	CHAC1|0.521	1	26	76	21829	http://www.ebi.ac.uk/QuickGO/GTerm?id=GO:0044273	[]
4	4	regulation of appetite	GO:0032098	0.0867	0.222	0	-0.14	6.85695	-11.527	CRHR2|2.007	1	26	76	21829	http://www.ebi.ac.uk/QuickGO/GTerm?id=GO:0032098	[]
9	8,9	hexose transmembrane transport	GO:0035428	0.0867	0.222	0	-0.14	6.85695	-11.527	SLC2A2|0.635	1	26	76	21829	http://www.ebi.ac.uk/QuickGO/GTerm?id=GO:0035428	[]
5	5	negative regulation of response to extracellular stimulus	GO:0032105	0.0867	0.222	0	-0.14	6.85695	-11.527	CRHR2|2.007	1	26	76	21829	http://www.ebi.ac.uk/QuickGO/GTerm?id=GO:0032105	[]
6	6	regulation of vacuole organization	GO:0044088	0.0899	0.226	0	-0.14	6.85695	-11.527	KIAA1324|5.521	1	27	76	21829	http://www.ebi.ac.uk/QuickGO/GTerm?id=GO:0044088	[]
7	5,7	negative regulation of cellular carbohydrate metabolic process	GO:0010677	0.0899	0.226	0	-0.14	6.85695	-11.527	SIK1|1.694	1	27	76	21829	http://www.ebi.ac.uk/QuickGO/GTerm?id=GO:0010677	[]
9	6,7,8,9	glycogen biosynthetic process	GO:0005978	0.0899	0.226	0	-0.14	6.85695	-11.527	IRS2|1.866	1	27	76	21829	http://www.ebi.ac.uk/QuickGO/GTerm?id=GO:0005978	[]
8	6,7,8	glucan biosynthetic process	GO:0009250	0.0899	0.226	0	-0.14	6.85695	-11.527	IRS2|1.866	1	27	76	21829	http://www.ebi.ac.uk/QuickGO/GTerm?id=GO:0009250	[]
7	3,6,7	cartilage condensation	GO:0001502	0.0899	0.226	0	-0.14	6.85695	-11.527	CDH2|1.906	1	27	76	21829	http://www.ebi.ac.uk/QuickGO/GTerm?id=GO:0001502	[]
8	8	positive regulation of phospholipase activity	GO:0010518	0.0899	0.226	0	-0.14	6.85695	-11.527	CYR61|2.231	1	27	76	21829	http://www.ebi.ac.uk/QuickGO/GTerm?id=GO:0010518	[]
5	5	glucose 6-phosphate metabolic process	GO:0051156	0.0899	0.226	0	-0.14	6.85695	-11.527	HKDC1|2.366	1	27	76	21829	http://www.ebi.ac.uk/QuickGO/GTerm?id=GO:0051156	[]
7	6,7	melanocyte differentiation	GO:0030318	0.0899	0.226	0	-0.14	6.85695	-11.527	ADAMTS9|0.583	1	27	76	21829	http://www.ebi.ac.uk/QuickGO/GTerm?id=GO:0030318	[]
7	7	cellular response to calcium ion	GO:0071277	0.0899	0.226	0	-0.14	6.85695	-11.527	FOS|3.316	1	27	76	21829	http://www.ebi.ac.uk/QuickGO/GTerm?id=GO:0071277	[]
4	4	apoptotic process involved in development	GO:1902742	0.0899	0.226	0	-0.14	6.85695	-11.527	CYR61|2.231	1	27	76	21829	http://www.ebi.ac.uk/QuickGO/GTerm?id=GO:1902742	[]
5	5	peptide catabolic process	GO:0043171	0.0899	0.226	0	-0.14	6.85695	-11.527	CHAC1|0.521	1	27	76	21829	http://www.ebi.ac.uk/QuickGO/GTerm?id=GO:0043171	[]
8	7,8	negative regulation of leukocyte apoptotic process	GO:2000107	0.0899	0.226	0	-0.14	6.85695	-11.527	IRS2|1.866	1	27	76	21829	http://www.ebi.ac.uk/QuickGO/GTerm?id=GO:2000107	[]
10	4,6,9,10	positive regulation of glucose transport	GO:0010828	0.0899	0.226	0	-0.14	6.85695	-11.527	IRS2|1.866	1	27	76	21829	http://www.ebi.ac.uk/QuickGO/GTerm?id=GO:0010828	[]
8	7,8	insulin-like growth factor receptor signaling pathway	GO:0048009	0.0899	0.226	0	-0.14	6.85695	-11.527	IGFBP1|0.446	1	27	76	21829	http://www.ebi.ac.uk/QuickGO/GTerm?id=GO:0048009	[]
5	4,5	single organismal cell-cell adhesion	GO:0016337	0.091	0.228	1.22	0.43	6.85695	-11.527	CDH2|1.906;FAT1|0.605;CYR61|2.231;EGR1|2.376	4	489	76	21829	http://www.ebi.ac.uk/QuickGO/GTerm?id=GO:0016337	[]
8	7,8	neuron projection morphogenesis	GO:0048812	0.0915	0.229	1.66	0.63	6.85695	-11.527	LRFN5|1.736;GFRA3|0.646;CCK1R|5.905;LPAR3|2.868	4	490	76	21829	http://www.ebi.ac.uk/QuickGO/GTerm?id=GO:0048812	[]
4	4	response to toxic substance	GO:0009636	0.092	0.23	-1.11	-0.66	6.85695	-11.527	SOD3|0.184;SLC6A14|0.423	2	146	76	21829	http://www.ebi.ac.uk/QuickGO/GTerm?id=GO:0009636	[]
5	5	phosphatidylcholine metabolic process	GO:0046470	0.0931	0.23	0	-0.14	6.85695	-11.527	ENPP2|0.6	1	28	76	21829	http://www.ebi.ac.uk/QuickGO/GTerm?id=GO:0046470	[]
11	8,10,11	toll-like receptor 3 signaling pathway	GO:0034138	0.0931	0.23	0	-0.14	6.85695	-11.527	JUN|2.208	1	28	76	21829	http://www.ebi.ac.uk/QuickGO/GTerm?id=GO:0034138	[]
12	6,7,9,10,11,12	positive regulation of insulin secretion	GO:0032024	0.0931	0.23	0	-0.14	6.85695	-11.527	IRS2|1.866	1	28	76	21829	http://www.ebi.ac.uk/QuickGO/GTerm?id=GO:0032024	[]
4	4	response to cold	GO:0009409	0.0931	0.23	0	-0.14	6.85695	-11.527	TRPA1|0.123	1	28	76	21829	http://www.ebi.ac.uk/QuickGO/GTerm?id=GO:0009409	[]
5	5	regulation of cofactor metabolic process	GO:0051193	0.0931	0.23	0	-0.14	6.85695	-11.527	PDK4|0.421	1	28	76	21829	http://www.ebi.ac.uk/QuickGO/GTerm?id=GO:0051193	[]
6	5,6	cardiac atrium morphogenesis	GO:0003209	0.0931	0.23	0	-0.14	6.85695	-11.527	CYR61|2.231	1	28	76	21829	http://www.ebi.ac.uk/QuickGO/GTerm?id=GO:0003209	[]
6	6	negative regulation of endothelial cell proliferation	GO:0001937	0.0931	0.23	0	-0.14	6.85695	-11.527	CAV2|0.417	1	28	76	21829	http://www.ebi.ac.uk/QuickGO/GTerm?id=GO:0001937	[]
6	6	regulation of coenzyme metabolic process	GO:0051196	0.0931	0.23	0	-0.14	6.85695	-11.527	PDK4|0.421	1	28	76	21829	http://www.ebi.ac.uk/QuickGO/GTerm?id=GO:0051196	[]
9	7,8,9	positive regulation of transcription from RNA polymerase II promoter	GO:0045944	0.0933	0.23	2.07	0.82	6.85695	-11.527	CYR61|2.231;EGR1|2.376;JUN|2.208;PPARGC1A|0.564;FOS|3.316;JAG1|1.703	6	900	76	21829	http://www.ebi.ac.uk/QuickGO/GTerm?id=GO:0045944	[]
7	7	glucose homeostasis	GO:0042593	0.0941	0.232	0	-0.14	6.85695	-11.527	HKDC1|2.366;PDK4|0.421	2	148	76	21829	http://www.ebi.ac.uk/QuickGO/GTerm?id=GO:0042593	[]
5	5	negative regulation of cell migration	GO:0030336	0.0941	0.232	0.61	0.14	6.85695	-11.527	CDH2|1.906;MCC|2.125	2	148	76	21829	http://www.ebi.ac.uk/QuickGO/GTerm?id=GO:0030336	[]
6	6	carbohydrate homeostasis	GO:0033500	0.0941	0.232	0	-0.14	6.85695	-11.527	HKDC1|2.366;PDK4|0.421	2	148	76	21829	http://www.ebi.ac.uk/QuickGO/GTerm?id=GO:0033500	[]
4	4	organophosphate metabolic process	GO:0019637	0.0942	0.232	-1.65	-0.91	6.85695	-11.527	SLC25A25|0.627;ENPP2|0.6;PANK1|0.639;PPARGC1A|0.564;HKDC1|2.366;AGPAT2|1.693;COX7C|0.658	7	1119	76	21829	http://www.ebi.ac.uk/QuickGO/GTerm?id=GO:0019637	[]
4	4	response to radiation	GO:0009314	0.0952	0.234	0.95	0.3	6.85695	-11.527	EGR1|2.376;JUN|2.208;SIK1|1.694	3	312	76	21829	http://www.ebi.ac.uk/QuickGO/GTerm?id=GO:0009314	[]
5	5	dopamine metabolic process	GO:0042417	0.0963	0.234	0	-0.14	6.85695	-11.527	MAOA|0.614	1	29	76	21829	http://www.ebi.ac.uk/QuickGO/GTerm?id=GO:0042417	[]
8	7,8	cAMP-mediated signaling	GO:0019933	0.0963	0.234	0	-0.14	6.85695	-11.527	CRHR2|2.007	1	29	76	21829	http://www.ebi.ac.uk/QuickGO/GTerm?id=GO:0019933	[]
6	6	mitochondrial genome maintenance	GO:0000002	0.0963	0.234	0	-0.14	6.85695	-11.527	PPARGC1A|0.564	1	29	76	21829	http://www.ebi.ac.uk/QuickGO/GTerm?id=GO:0000002	[]
11	8,10,11	toll-like receptor 2 signaling pathway	GO:0034134	0.0963	0.234	0	-0.14	6.85695	-11.527	JUN|2.208	1	29	76	21829	http://www.ebi.ac.uk/QuickGO/GTerm?id=GO:0034134	[]
10	7,9,10	Wnt signaling pathway, planar cell polarity pathway	GO:0060071	0.0963	0.234	0	-0.14	6.85695	-11.527	ANKRD6|0.513	1	29	76	21829	http://www.ebi.ac.uk/QuickGO/GTerm?id=GO:0060071	[]
6	4,6	positive regulation of kidney development	GO:0090184	0.0963	0.234	0	-0.14	6.85695	-11.527	PROM1|0.467	1	29	76	21829	http://www.ebi.ac.uk/QuickGO/GTerm?id=GO:0090184	[]
5	5	regulation of response to extracellular stimulus	GO:0032104	0.0973	0.236	1.04	0.34	6.85695	-11.527	KIAA1324|5.521;CRHR2|2.007	2	151	76	21829	http://www.ebi.ac.uk/QuickGO/GTerm?id=GO:0032104	[]
6	6	regulation of response to nutrient levels	GO:0032107	0.0973	0.236	1.04	0.34	6.85695	-11.527	KIAA1324|5.521;CRHR2|2.007	2	151	76	21829	http://www.ebi.ac.uk/QuickGO/GTerm?id=GO:0032107	[]
5	5	carbohydrate biosynthetic process	GO:0016051	0.0973	0.236	0.5	0.09	6.85695	-11.527	SIK1|1.694;IRS2|1.866	2	151	76	21829	http://www.ebi.ac.uk/QuickGO/GTerm?id=GO:0016051	[]
4	4	brain development	GO:0007420	0.0984	0.237	1.51	0.56	6.85695	-11.527	CDH2|1.906;RARA|1.526;CCK1R|5.905;IRS2|1.866	4	503	76	21829	http://www.ebi.ac.uk/QuickGO/GTerm?id=GO:0007420	[]
6	6	aorta development	GO:0035904	0.0994	0.237	0	-0.14	6.85695	-11.527	JAG1|1.703	1	30	76	21829	http://www.ebi.ac.uk/QuickGO/GTerm?id=GO:0035904	[]
6	6	nucleoside bisphosphate metabolic process	GO:0033865	0.0994	0.237	0	-0.14	6.85695	-11.527	PANK1|0.639	1	30	76	21829	http://www.ebi.ac.uk/QuickGO/GTerm?id=GO:0033865	[]
5	5	brain morphogenesis	GO:0048854	0.0994	0.237	0	-0.14	6.85695	-11.527	CDH2|1.906	1	30	76	21829	http://www.ebi.ac.uk/QuickGO/GTerm?id=GO:0048854	[]
6	5,6	positive regulation of response to extracellular stimulus	GO:0032106	0.0994	0.237	0	-0.14	6.85695	-11.527	KIAA1324|5.521	1	30	76	21829	http://www.ebi.ac.uk/QuickGO/GTerm?id=GO:0032106	[]
6	6	purine nucleoside bisphosphate metabolic process	GO:0034032	0.0994	0.237	0	-0.14	6.85695	-11.527	PANK1|0.639	1	30	76	21829	http://www.ebi.ac.uk/QuickGO/GTerm?id=GO:0034032	[]
9	6,8,9	regulation of transcription from RNA polymerase II promoter in response to stress	GO:0043618	0.0994	0.237	0	-0.14	6.85695	-11.527	EGR1|2.376	1	30	76	21829	http://www.ebi.ac.uk/QuickGO/GTerm?id=GO:0043618	[]
7	7	ribonucleoside bisphosphate metabolic process	GO:0033875	0.0994	0.237	0	-0.14	6.85695	-11.527	PANK1|0.639	1	30	76	21829	http://www.ebi.ac.uk/QuickGO/GTerm?id=GO:0033875	[]
5	5	cardiac atrium development	GO:0003230	0.0994	0.237	0	-0.14	6.85695	-11.527	CYR61|2.231	1	30	76	21829	http://www.ebi.ac.uk/QuickGO/GTerm?id=GO:0003230	[]
7	6,7	positive regulation of response to nutrient levels	GO:0032109	0.0994	0.237	0	-0.14	6.85695	-11.527	KIAA1324|5.521	1	30	76	21829	http://www.ebi.ac.uk/QuickGO/GTerm?id=GO:0032109	[]
6	4,6	negative regulation of carbohydrate metabolic process	GO:0045912	0.0994	0.237	0	-0.14	6.85695	-11.527	SIK1|1.694	1	30	76	21829	http://www.ebi.ac.uk/QuickGO/GTerm?id=GO:0045912	[]
9	6,8,9	regulation of establishment of planar polarity	GO:0090175	0.0994	0.237	0	-0.14	6.85695	-11.527	ANKRD6|0.513	1	30	76	21829	http://www.ebi.ac.uk/QuickGO/GTerm?id=GO:0090175	[]
6	5,6	regulation of bone remodeling	GO:0046850	0.0994	0.237	0	-0.14	6.85695	-11.527	PDK4|0.421	1	30	76	21829	http://www.ebi.ac.uk/QuickGO/GTerm?id=GO:0046850	[]
4	4	negative regulation of cell motility	GO:2000146	0.0995	0.237	0.61	0.14	6.85695	-11.527	CDH2|1.906;MCC|2.125	2	153	76	21829	http://www.ebi.ac.uk/QuickGO/GTerm?id=GO:2000146	[]
4	4	cellular response to external stimulus	GO:0071496	0.1	0.238	0.38	0.03	6.85695	-11.527	FOS|3.316;KIAA1324|5.521;PDK4|0.421	3	319	76	21829	http://www.ebi.ac.uk/QuickGO/GTerm?id=GO:0071496	[]
5	5	muscle cell differentiation	GO:0042692	0.102	0.241	0.38	0.03	6.85695	-11.527	CAV2|0.417;CDH2|1.906;SIK1|1.694	3	322	76	21829	http://www.ebi.ac.uk/QuickGO/GTerm?id=GO:0042692	[]
5	5	blood vessel remodeling	GO:0001974	0.103	0.241	0	-0.14	6.85695	-11.527	JAG1|1.703	1	31	76	21829	http://www.ebi.ac.uk/QuickGO/GTerm?id=GO:0001974	[]
7	5,6,7	positive regulation of smoothened signaling pathway	GO:0045880	0.103	0.241	0	-0.14	6.85695	-11.527	EVC|0.468	1	31	76	21829	http://www.ebi.ac.uk/QuickGO/GTerm?id=GO:0045880	[]
8	7,8	viral entry into host cell	GO:0046718	0.103	0.241	0	-0.14	6.85695	-11.527	CAV2|0.417	1	31	76	21829	http://www.ebi.ac.uk/QuickGO/GTerm?id=GO:0046718	[]
5	5	postsynaptic membrane organization	GO:0001941	0.103	0.241	0	-0.14	6.85695	-11.527	CDH2|1.906	1	31	76	21829	http://www.ebi.ac.uk/QuickGO/GTerm?id=GO:0001941	[]
7	5,6,7	positive regulation of bone mineralization	GO:0030501	0.103	0.241	0	-0.14	6.85695	-11.527	KL|3.059	1	31	76	21829	http://www.ebi.ac.uk/QuickGO/GTerm?id=GO:0030501	[]
11	8,10,11	toll-like receptor 4 signaling pathway	GO:0034142	0.103	0.241	0	-0.14	6.85695	-11.527	JUN|2.208	1	31	76	21829	http://www.ebi.ac.uk/QuickGO/GTerm?id=GO:0034142	[]
7	5,6,7	regulation of viral transcription	GO:0046782	0.103	0.241	0	-0.14	6.85695	-11.527	JUN|2.208	1	31	76	21829	http://www.ebi.ac.uk/QuickGO/GTerm?id=GO:0046782	[]
6	6	nucleotide metabolic process	GO:0009117	0.103	0.241	-1.2	-0.7	6.85695	-11.527	SLC25A25|0.627;PANK1|0.639;PPARGC1A|0.564;HKDC1|2.366;COX7C|0.658	5	713	76	21829	http://www.ebi.ac.uk/QuickGO/GTerm?id=GO:0009117	[]
6	5,6	regulation of angiogenesis	GO:0045765	0.104	0.244	-0.08	-0.18	6.85695	-11.527	ENPP2|0.6;CRHR2|2.007	2	157	76	21829	http://www.ebi.ac.uk/QuickGO/GTerm?id=GO:0045765	[]
5	5	cellular response to transforming growth factor beta stimulus	GO:0071560	0.105	0.244	-0.14	-0.21	6.85695	-11.527	CAV2|0.417;FOS|3.316	2	158	76	21829	http://www.ebi.ac.uk/QuickGO/GTerm?id=GO:0071560	[]
6	5,6	tissue homeostasis	GO:0001894	0.105	0.244	-0.71	-0.47	6.85695	-11.527	PROM1|0.467;PDK4|0.421	2	158	76	21829	http://www.ebi.ac.uk/QuickGO/GTerm?id=GO:0001894	[]
4	4	response to transforming growth factor beta	GO:0071559	0.105	0.244	-0.14	-0.21	6.85695	-11.527	CAV2|0.417;FOS|3.316	2	158	76	21829	http://www.ebi.ac.uk/QuickGO/GTerm?id=GO:0071559	[]
6	6	heterophilic cell-cell adhesion via plasma membrane cell adhesion molecules	GO:0007157	0.106	0.244	0	-0.14	6.85695	-11.527	CDH2|1.906	1	32	76	21829	http://www.ebi.ac.uk/QuickGO/GTerm?id=GO:0007157	[]
9	6,7,8,9	regulation of gluconeogenesis	GO:0006111	0.106	0.244	0	-0.14	6.85695	-11.527	SIK1|1.694	1	32	76	21829	http://www.ebi.ac.uk/QuickGO/GTerm?id=GO:0006111	[]
4	4	positive regulation of biomineral tissue development	GO:0070169	0.106	0.244	0	-0.14	6.85695	-11.527	KL|3.059	1	32	76	21829	http://www.ebi.ac.uk/QuickGO/GTerm?id=GO:0070169	[]
7	5,6,7	negative regulation of fat cell differentiation	GO:0045599	0.106	0.244	0	-0.14	6.85695	-11.527	JAG1|1.703	1	32	76	21829	http://www.ebi.ac.uk/QuickGO/GTerm?id=GO:0045599	[]
7	5,6,7	positive regulation of Notch signaling pathway	GO:0045747	0.106	0.244	0	-0.14	6.85695	-11.527	JAG1|1.703	1	32	76	21829	http://www.ebi.ac.uk/QuickGO/GTerm?id=GO:0045747	[]
8	4,7,8	photoreceptor cell maintenance	GO:0045494	0.106	0.244	0	-0.14	6.85695	-11.527	PROM1|0.467	1	32	76	21829	http://www.ebi.ac.uk/QuickGO/GTerm?id=GO:0045494	[]
7	5,7	catecholamine metabolic process	GO:0006584	0.106	0.244	0	-0.14	6.85695	-11.527	MAOA|0.614	1	32	76	21829	http://www.ebi.ac.uk/QuickGO/GTerm?id=GO:0006584	[]
6	6	catechol-containing compound metabolic process	GO:0009712	0.106	0.244	0	-0.14	6.85695	-11.527	MAOA|0.614	1	32	76	21829	http://www.ebi.ac.uk/QuickGO/GTerm?id=GO:0009712	[]
7	6,7	viral transcription	GO:0019083	0.106	0.244	0	-0.14	6.85695	-11.527	JUN|2.208	1	32	76	21829	http://www.ebi.ac.uk/QuickGO/GTerm?id=GO:0019083	[]
3	3	positive regulation of growth	GO:0045927	0.106	0.245	0.8	0.23	6.85695	-11.527	JUN|2.208;LPAR3|2.868	2	159	76	21829	http://www.ebi.ac.uk/QuickGO/GTerm?id=GO:0045927	[]
7	4,7	regulation of hormone secretion	GO:0046883	0.107	0.247	1.04	0.34	6.85695	-11.527	CCK1R|5.905;IRS2|1.866	2	160	76	21829	http://www.ebi.ac.uk/QuickGO/GTerm?id=GO:0046883	[]
4	4	regulation of hormone levels	GO:0010817	0.107	0.247	0.22	-0.04	6.85695	-11.527	CCK1R|5.905;BCO1|0.596;IRS2|1.866	3	329	76	21829	http://www.ebi.ac.uk/QuickGO/GTerm?id=GO:0010817	[]
4	4	organonitrogen compound metabolic process	GO:1901564	0.108	0.247	-7.94	-3.82	6.85695	-11.527	NIM1K|1.617;CERS6|0.346;CDH2|1.906;CTSK|2.109;CDO1|0.672;SLC25A25|0.627;MST1R|1.705;CHAC1|0.521;ENPP2|0.6;CYR61|2.231;PANK1|0.639;EGR1|2.376;PPARGC1A|0.564;WFDC1|0.417;HKDC1|2.366;MAOA|0.614;LAP3|0.573;SGK2|0.559;PIPOX|1.809;KL|3.059;RNF144A|2.045;LPAR3|2.868;SLC6A14|0.423;COX7C|0.658;ANKRD6|0.513;DUSP8|1.567;PDK4|0.421	27	6205	76	21829	http://www.ebi.ac.uk/QuickGO/GTerm?id=GO:1901564	[]
5	5	nucleoside phosphate metabolic process	GO:0006753	0.108	0.247	-1.2	-0.7	6.85695	-11.527	SLC25A25|0.627;PANK1|0.639;PPARGC1A|0.564;HKDC1|2.366;COX7C|0.658	5	725	76	21829	http://www.ebi.ac.uk/QuickGO/GTerm?id=GO:0006753	[]
10	6,7,8,10	regulation of extrinsic apoptotic signaling pathway in absence of ligand	GO:2001239	0.109	0.247	0	-0.14	6.85695	-11.527	KIAA1324|5.521	1	33	76	21829	http://www.ebi.ac.uk/QuickGO/GTerm?id=GO:2001239	[]
2	2	cell aggregation	GO:0098743	0.109	0.247	0	-0.14	6.85695	-11.527	CDH2|1.906	1	33	76	21829	http://www.ebi.ac.uk/QuickGO/GTerm?id=GO:0098743	[]
7	7	regulation of phospholipase activity	GO:0010517	0.109	0.247	0	-0.14	6.85695	-11.527	CYR61|2.231	1	33	76	21829	http://www.ebi.ac.uk/QuickGO/GTerm?id=GO:0010517	[]
6	5,6	programmed cell death involved in cell development	GO:0010623	0.109	0.247	0	-0.14	6.85695	-11.527	CYR61|2.231	1	33	76	21829	http://www.ebi.ac.uk/QuickGO/GTerm?id=GO:0010623	[]
10	7,9,10	regulation of ATP metabolic process	GO:1903578	0.109	0.247	0	-0.14	6.85695	-11.527	PPARGC1A|0.564	1	33	76	21829	http://www.ebi.ac.uk/QuickGO/GTerm?id=GO:1903578	[]
9	6,7,8,9	positive regulation of BMP signaling pathway	GO:0030513	0.109	0.247	0	-0.14	6.85695	-11.527	CYR61|2.231	1	33	76	21829	http://www.ebi.ac.uk/QuickGO/GTerm?id=GO:0030513	[]
6	6	regulation of nucleoside metabolic process	GO:0009118	0.109	0.247	0	-0.14	6.85695	-11.527	PPARGC1A|0.564	1	33	76	21829	http://www.ebi.ac.uk/QuickGO/GTerm?id=GO:0009118	[]
8	5,7,8	regulation of DNA-templated transcription in response to stress	GO:0043620	0.109	0.247	0	-0.14	6.85695	-11.527	EGR1|2.376	1	33	76	21829	http://www.ebi.ac.uk/QuickGO/GTerm?id=GO:0043620	[]
5	5	mitotic cell cycle	GO:0000278	0.109	0.248	-1.53	-0.85	6.85695	-11.527	CAV2|0.417;TOP2A|0.53;SIK1|1.694;SMC2|0.493;MZT1|0.461	5	727	76	21829	http://www.ebi.ac.uk/QuickGO/GTerm?id=GO:0000278	[]
5	4,5	negative regulation of cellular component movement	GO:0051271	0.111	0.25	0.61	0.14	6.85695	-11.527	CDH2|1.906;MCC|2.125	2	163	76	21829	http://www.ebi.ac.uk/QuickGO/GTerm?id=GO:0051271	[]
4	4	angiogenesis	GO:0001525	0.111	0.25	0.22	-0.04	6.85695	-11.527	ENPP2|0.6;CYR61|2.231;CRHR2|2.007	3	334	76	21829	http://www.ebi.ac.uk/QuickGO/GTerm?id=GO:0001525	[]
5	5	membrane lipid metabolic process	GO:0006643	0.112	0.25	0.11	-0.09	6.85695	-11.527	CERS6|0.346;CYR61|2.231	2	164	76	21829	http://www.ebi.ac.uk/QuickGO/GTerm?id=GO:0006643	[]
7	7	positive regulation of lipase activity	GO:0060193	0.112	0.25	0	-0.14	6.85695	-11.527	CYR61|2.231	1	34	76	21829	http://www.ebi.ac.uk/QuickGO/GTerm?id=GO:0060193	[]
6	6	entry into host	GO:0044409	0.112	0.25	0	-0.14	6.85695	-11.527	CAV2|0.417	1	34	76	21829	http://www.ebi.ac.uk/QuickGO/GTerm?id=GO:0044409	[]
7	7	entry into host cell	GO:0030260	0.112	0.25	0	-0.14	6.85695	-11.527	CAV2|0.417	1	34	76	21829	http://www.ebi.ac.uk/QuickGO/GTerm?id=GO:0030260	[]
6	6	entry into cell of other organism involved in symbiotic interaction	GO:0051806	0.112	0.25	0	-0.14	6.85695	-11.527	CAV2|0.417	1	34	76	21829	http://www.ebi.ac.uk/QuickGO/GTerm?id=GO:0051806	[]
6	5,6	positive regulation of mesenchymal cell proliferation	GO:0002053	0.112	0.25	0	-0.14	6.85695	-11.527	IRS2|1.866	1	34	76	21829	http://www.ebi.ac.uk/QuickGO/GTerm?id=GO:0002053	[]
5	5	negative regulation of epithelial cell differentiation	GO:0030857	0.112	0.25	0	-0.14	6.85695	-11.527	JAG1|1.703	1	34	76	21829	http://www.ebi.ac.uk/QuickGO/GTerm?id=GO:0030857	[]
7	6,7	cyclic-nucleotide-mediated signaling	GO:0019935	0.112	0.25	0	-0.14	6.85695	-11.527	CRHR2|2.007	1	34	76	21829	http://www.ebi.ac.uk/QuickGO/GTerm?id=GO:0019935	[]
5	5	entry into other organism involved in symbiotic interaction	GO:0051828	0.112	0.25	0	-0.14	6.85695	-11.527	CAV2|0.417	1	34	76	21829	http://www.ebi.ac.uk/QuickGO/GTerm?id=GO:0051828	[]
5	5	regulation of lipid catabolic process	GO:0050994	0.112	0.25	0	-0.14	6.85695	-11.527	IRS2|1.866	1	34	76	21829	http://www.ebi.ac.uk/QuickGO/GTerm?id=GO:0050994	[]
5	4,5	regulation of cellular metabolic process	GO:0031323	0.114	0.253	8.05	3.59	6.85695	-11.527	CAV2|0.417;CDH2|1.906;ACSL1|0.614;MST1R|1.705;CHAC1|0.521;CYR61|2.231;EGR1|2.376;JUN|2.208;PPARGC1A|0.564;RARA|1.526;FOS|3.316;WFDC1|0.417;SIK1|1.694;KIAA1324|5.521;CHRDL1|0.429;IRS2|1.866;KL|3.059;RNF144A|2.045;LPAR3|2.868;AEBP1|2.049;ANKRD6|0.513;DUSP8|1.567;JAG1|1.703;PDK4|0.421	24	5435	76	21829	http://www.ebi.ac.uk/QuickGO/GTerm?id=GO:0031323	[]
4	4	developmental growth involved in morphogenesis	GO:0060560	0.114	0.253	-0.13	-0.2	6.85695	-11.527	EVC|0.468;LPAR3|2.868	2	166	76	21829	http://www.ebi.ac.uk/QuickGO/GTerm?id=GO:0060560	[]
6	5,6	dopamine receptor signaling pathway	GO:0007212	0.115	0.253	0	-0.14	6.85695	-11.527	CAV2|0.417	1	35	76	21829	http://www.ebi.ac.uk/QuickGO/GTerm?id=GO:0007212	[]
5	5	endocardial cushion development	GO:0003197	0.115	0.253	0	-0.14	6.85695	-11.527	JAG1|1.703	1	35	76	21829	http://www.ebi.ac.uk/QuickGO/GTerm?id=GO:0003197	[]
3	3	movement in environment of other organism involved in symbiotic interaction	GO:0052192	0.115	0.253	0	-0.14	6.85695	-11.527	CAV2|0.417	1	35	76	21829	http://www.ebi.ac.uk/QuickGO/GTerm?id=GO:0052192	[]
7	5,6,7	positive regulation of cellular carbohydrate metabolic process	GO:0010676	0.115	0.253	0	-0.14	6.85695	-11.527	IRS2|1.866	1	35	76	21829	http://www.ebi.ac.uk/QuickGO/GTerm?id=GO:0010676	[]
5	5	positive regulation of lipid biosynthetic process	GO:0046889	0.115	0.253	0	-0.14	6.85695	-11.527	CYR61|2.231	1	35	76	21829	http://www.ebi.ac.uk/QuickGO/GTerm?id=GO:0046889	[]
4	4	positive regulation of cartilage development	GO:0061036	0.115	0.253	0	-0.14	6.85695	-11.527	CYR61|2.231	1	35	76	21829	http://www.ebi.ac.uk/QuickGO/GTerm?id=GO:0061036	[]
11	8,10,11	MyD88-dependent toll-like receptor signaling pathway	GO:0002755	0.115	0.253	0	-0.14	6.85695	-11.527	JUN|2.208	1	35	76	21829	http://www.ebi.ac.uk/QuickGO/GTerm?id=GO:0002755	[]
5	4,5	movement in host environment	GO:0052126	0.115	0.253	0	-0.14	6.85695	-11.527	CAV2|0.417	1	35	76	21829	http://www.ebi.ac.uk/QuickGO/GTerm?id=GO:0052126	[]
5	5	detection of mechanical stimulus	GO:0050982	0.115	0.253	0	-0.14	6.85695	-11.527	TRPA1|0.123	1	35	76	21829	http://www.ebi.ac.uk/QuickGO/GTerm?id=GO:0050982	[]
8	8	skeletal muscle fiber development	GO:0048741	0.115	0.253	0	-0.14	6.85695	-11.527	CAV2|0.417	1	35	76	21829	http://www.ebi.ac.uk/QuickGO/GTerm?id=GO:0048741	[]
4	3,4	single organism cell adhesion	GO:0098602	0.117	0.257	1.22	0.43	6.85695	-11.527	CDH2|1.906;FAT1|0.605;CYR61|2.231;EGR1|2.376	4	537	76	21829	http://www.ebi.ac.uk/QuickGO/GTerm?id=GO:0098602	[]
6	6	response to gamma radiation	GO:0010332	0.118	0.257	0	-0.14	6.85695	-11.527	EGR1|2.376	1	36	76	21829	http://www.ebi.ac.uk/QuickGO/GTerm?id=GO:0010332	[]
9	8,9	regulation of lymphocyte apoptotic process	GO:0070228	0.118	0.257	0	-0.14	6.85695	-11.527	IRS2|1.866	1	36	76	21829	http://www.ebi.ac.uk/QuickGO/GTerm?id=GO:0070228	[]
6	4,6	ethanolamine-containing compound metabolic process	GO:0042439	0.118	0.257	0	-0.14	6.85695	-11.527	ENPP2|0.6	1	36	76	21829	http://www.ebi.ac.uk/QuickGO/GTerm?id=GO:0042439	[]
10	7,8,9,10	positive regulation of B cell proliferation	GO:0030890	0.118	0.257	0	-0.14	6.85695	-11.527	IRS2|1.866	1	36	76	21829	http://www.ebi.ac.uk/QuickGO/GTerm?id=GO:0030890	[]
6	6	alcohol catabolic process	GO:0046164	0.118	0.257	0	-0.14	6.85695	-11.527	ENPP2|0.6	1	36	76	21829	http://www.ebi.ac.uk/QuickGO/GTerm?id=GO:0046164	[]
4	4	respiratory gaseous exchange	GO:0007585	0.118	0.257	0	-0.14	6.85695	-11.527	SLC5A3|1.572	1	36	76	21829	http://www.ebi.ac.uk/QuickGO/GTerm?id=GO:0007585	[]
6	5,6	pigment cell differentiation	GO:0050931	0.118	0.257	0	-0.14	6.85695	-11.527	ADAMTS9|0.583	1	36	76	21829	http://www.ebi.ac.uk/QuickGO/GTerm?id=GO:0050931	[]
6	5,6	retinoic acid receptor signaling pathway	GO:0048384	0.118	0.257	0	-0.14	6.85695	-11.527	RARA|1.526	1	36	76	21829	http://www.ebi.ac.uk/QuickGO/GTerm?id=GO:0048384	[]
4	4	head development	GO:0060322	0.119	0.259	1.51	0.56	6.85695	-11.527	CDH2|1.906;RARA|1.526;CCK1R|5.905;IRS2|1.866	4	540	76	21829	http://www.ebi.ac.uk/QuickGO/GTerm?id=GO:0060322	[]
3	3	negative regulation of locomotion	GO:0040013	0.12	0.26	0.61	0.14	6.85695	-11.527	CDH2|1.906;MCC|2.125	2	171	76	21829	http://www.ebi.ac.uk/QuickGO/GTerm?id=GO:0040013	[]
5	5	regulation of vasculature development	GO:1901342	0.12	0.26	-0.08	-0.18	6.85695	-11.527	ENPP2|0.6;CRHR2|2.007	2	171	76	21829	http://www.ebi.ac.uk/QuickGO/GTerm?id=GO:1901342	[]
3	3	positive regulation of immune system process	GO:0002684	0.12	0.26	1.37	0.49	6.85695	-11.527	JUN|2.208;FOS|3.316;IRS2|1.866;JAG1|1.703	4	541	76	21829	http://www.ebi.ac.uk/QuickGO/GTerm?id=GO:0002684	[]
6	5,6	sister chromatid segregation	GO:0000819	0.121	0.262	-0.58	-0.41	6.85695	-11.527	TOP2A|0.53;SMC2|0.493	2	172	76	21829	http://www.ebi.ac.uk/QuickGO/GTerm?id=GO:0000819	[]
9	9	synaptic transmission, cholinergic	GO:0007271	0.121	0.262	0	-0.14	6.85695	-11.527	RIC3|0.491	1	37	76	21829	http://www.ebi.ac.uk/QuickGO/GTerm?id=GO:0007271	[]
6	5,6	osteoblast differentiation	GO:0001649	0.122	0.263	0.58	0.13	6.85695	-11.527	CYR61|2.231;JAG1|1.703	2	173	76	21829	http://www.ebi.ac.uk/QuickGO/GTerm?id=GO:0001649	[]
7	6,7	bone resorption	GO:0045453	0.124	0.266	0	-0.14	6.85695	-11.527	PDK4|0.421	1	38	76	21829	http://www.ebi.ac.uk/QuickGO/GTerm?id=GO:0045453	[]
4	4	trabecula morphogenesis	GO:0061383	0.124	0.266	0	-0.14	6.85695	-11.527	ADAMTS1|1.877	1	38	76	21829	http://www.ebi.ac.uk/QuickGO/GTerm?id=GO:0061383	[]
11	6,10,11	regulation of glucose import	GO:0046324	0.124	0.266	0	-0.14	6.85695	-11.527	IRS2|1.866	1	38	76	21829	http://www.ebi.ac.uk/QuickGO/GTerm?id=GO:0046324	[]
5	4,5	regulation of tissue remodeling	GO:0034103	0.124	0.266	0	-0.14	6.85695	-11.527	PDK4|0.421	1	38	76	21829	http://www.ebi.ac.uk/QuickGO/GTerm?id=GO:0034103	[]
8	7,8	reciprocal DNA recombination	GO:0035825	0.124	0.266	0	-0.14	6.85695	-11.527	TOP2A|0.53	1	38	76	21829	http://www.ebi.ac.uk/QuickGO/GTerm?id=GO:0035825	[]
5	5	negative regulation of stem cell differentiation	GO:2000737	0.124	0.266	0	-0.14	6.85695	-11.527	JAG1|1.703	1	38	76	21829	http://www.ebi.ac.uk/QuickGO/GTerm?id=GO:2000737	[]
9	5,8,9	reciprocal meiotic recombination	GO:0007131	0.124	0.266	0	-0.14	6.85695	-11.527	TOP2A|0.53	1	38	76	21829	http://www.ebi.ac.uk/QuickGO/GTerm?id=GO:0007131	[]
6	5,6	cellular polysaccharide biosynthetic process	GO:0033692	0.124	0.266	0	-0.14	6.85695	-11.527	IRS2|1.866	1	38	76	21829	http://www.ebi.ac.uk/QuickGO/GTerm?id=GO:0033692	[]
4	4	hindbrain morphogenesis	GO:0021575	0.124	0.266	0	-0.14	6.85695	-11.527	RARA|1.526	1	38	76	21829	http://www.ebi.ac.uk/QuickGO/GTerm?id=GO:0021575	[]
9	6,9	auditory receptor cell differentiation	GO:0042491	0.127	0.27	0	-0.14	6.85695	-11.527	JAG1|1.703	1	39	76	21829	http://www.ebi.ac.uk/QuickGO/GTerm?id=GO:0042491	[]
5	5	modification by host of symbiont morphology or physiology	GO:0051851	0.127	0.27	0	-0.14	6.85695	-11.527	JUN|2.208	1	39	76	21829	http://www.ebi.ac.uk/QuickGO/GTerm?id=GO:0051851	[]
8	5,7,8	establishment of planar polarity	GO:0001736	0.127	0.27	0	-0.14	6.85695	-11.527	ANKRD6|0.513	1	39	76	21829	http://www.ebi.ac.uk/QuickGO/GTerm?id=GO:0001736	[]
7	5,7	negative regulation of wound healing	GO:0061045	0.127	0.27	0	-0.14	6.85695	-11.527	WFDC1|0.417	1	39	76	21829	http://www.ebi.ac.uk/QuickGO/GTerm?id=GO:0061045	[]
8	7,8	myotube cell development	GO:0014904	0.127	0.27	0	-0.14	6.85695	-11.527	CAV2|0.417	1	39	76	21829	http://www.ebi.ac.uk/QuickGO/GTerm?id=GO:0014904	[]
6	6	viral gene expression	GO:0019080	0.127	0.27	0	-0.14	6.85695	-11.527	JUN|2.208	1	39	76	21829	http://www.ebi.ac.uk/QuickGO/GTerm?id=GO:0019080	[]
5	5	response to cAMP	GO:0051591	0.127	0.27	0	-0.14	6.85695	-11.527	JUN|2.208	1	39	76	21829	http://www.ebi.ac.uk/QuickGO/GTerm?id=GO:0051591	[]
3	3	anatomical structure formation involved in morphogenesis	GO:0048646	0.128	0.271	1.85	0.71	6.85695	-11.527	ADAMTS1|1.877;CDH2|1.906;ENPP2|0.6;CYR61|2.231;SDK2|2.638;CRHR2|2.007	6	985	76	21829	http://www.ebi.ac.uk/QuickGO/GTerm?id=GO:0048646	[]
6	5,6	cartilage development	GO:0051216	0.13	0.274	0.63	0.15	6.85695	-11.527	CDH2|1.906;CYR61|2.231	2	180	76	21829	http://www.ebi.ac.uk/QuickGO/GTerm?id=GO:0051216	[]
8	7,8	regulation of myotube differentiation	GO:0010830	0.13	0.274	0	-0.14	6.85695	-11.527	SIK1|1.694	1	40	76	21829	http://www.ebi.ac.uk/QuickGO/GTerm?id=GO:0010830	[]
4	4	establishment of tissue polarity	GO:0007164	0.13	0.274	0	-0.14	6.85695	-11.527	ANKRD6|0.513	1	40	76	21829	http://www.ebi.ac.uk/QuickGO/GTerm?id=GO:0007164	[]
6	6	T cell mediated immunity	GO:0002456	0.13	0.274	0	-0.14	6.85695	-11.527	JAG1|1.703	1	40	76	21829	http://www.ebi.ac.uk/QuickGO/GTerm?id=GO:0002456	[]
9	9	protein sumoylation	GO:0016925	0.13	0.274	0	-0.14	6.85695	-11.527	EGR1|2.376	1	40	76	21829	http://www.ebi.ac.uk/QuickGO/GTerm?id=GO:0016925	[]
5	5	cell surface receptor signaling pathway involved in cell-cell signaling	GO:1905114	0.131	0.276	0.29	-0.01	6.85695	-11.527	CDH2|1.906;ANKRD6|0.513;MCC|2.125	3	361	76	21829	http://www.ebi.ac.uk/QuickGO/GTerm?id=GO:1905114	[]
4	4	negative regulation of response to external stimulus	GO:0032102	0.132	0.278	0.08	-0.11	6.85695	-11.527	WFDC1|0.417;CRHR2|2.007	2	182	76	21829	http://www.ebi.ac.uk/QuickGO/GTerm?id=GO:0032102	[]
6	4,5,6	positive regulation of organelle assembly	GO:1902117	0.133	0.278	0	-0.14	6.85695	-11.527	KIAA1324|5.521	1	41	76	21829	http://www.ebi.ac.uk/QuickGO/GTerm?id=GO:1902117	[]
7	6,7	positive regulation of myeloid leukocyte differentiation	GO:0002763	0.133	0.278	0	-0.14	6.85695	-11.527	FOS|3.316	1	41	76	21829	http://www.ebi.ac.uk/QuickGO/GTerm?id=GO:0002763	[]
6	6	positive regulation of endothelial cell proliferation	GO:0001938	0.133	0.278	0	-0.14	6.85695	-11.527	CAV2|0.417	1	41	76	21829	http://www.ebi.ac.uk/QuickGO/GTerm?id=GO:0001938	[]
6	4,6	negative regulation of epithelial cell migration	GO:0010633	0.133	0.278	0	-0.14	6.85695	-11.527	MCC|2.125	1	41	76	21829	http://www.ebi.ac.uk/QuickGO/GTerm?id=GO:0010633	[]
5	5	sulfur amino acid metabolic process	GO:0000096	0.133	0.278	0	-0.14	6.85695	-11.527	CDO1|0.672	1	41	76	21829	http://www.ebi.ac.uk/QuickGO/GTerm?id=GO:0000096	[]
4	4	regulation of primary metabolic process	GO:0080090	0.136	0.281	7.31	3.25	6.85695	-11.527	CAV2|0.417;CDH2|1.906;ACSL1|0.614;MST1R|1.705;CHAC1|0.521;CYR61|2.231;EGR1|2.376;JUN|2.208;PPARGC1A|0.564;RARA|1.526;FOS|3.316;WFDC1|0.417;SIK1|1.694;CHRDL1|0.429;IRS2|1.866;KL|3.059;RNF144A|2.045;LPAR3|2.868;AEBP1|2.049;ANKRD6|0.513;DUSP8|1.567;JAG1|1.703;PDK4|0.421	23	5284	76	21829	http://www.ebi.ac.uk/QuickGO/GTerm?id=GO:0080090	[]
7	6,7	intrinsic apoptotic signaling pathway in response to endoplasmic reticulum stress	GO:0070059	0.136	0.281	0	-0.14	6.85695	-11.527	CHAC1|0.521	1	42	76	21829	http://www.ebi.ac.uk/QuickGO/GTerm?id=GO:0070059	[]
6	6	regulation of lipase activity	GO:0060191	0.136	0.281	0	-0.14	6.85695	-11.527	CYR61|2.231	1	42	76	21829	http://www.ebi.ac.uk/QuickGO/GTerm?id=GO:0060191	[]
7	6,7	negative regulation of transforming growth factor beta receptor signaling pathway	GO:0030512	0.136	0.281	0	-0.14	6.85695	-11.527	CAV2|0.417	1	42	76	21829	http://www.ebi.ac.uk/QuickGO/GTerm?id=GO:0030512	[]
5	5	regulation of mesenchymal cell proliferation	GO:0010464	0.136	0.281	0	-0.14	6.85695	-11.527	IRS2|1.866	1	42	76	21829	http://www.ebi.ac.uk/QuickGO/GTerm?id=GO:0010464	[]
7	7	regulation of osteoclast differentiation	GO:0045670	0.136	0.281	0	-0.14	6.85695	-11.527	FOS|3.316	1	42	76	21829	http://www.ebi.ac.uk/QuickGO/GTerm?id=GO:0045670	[]
5	5	regulation of kidney development	GO:0090183	0.136	0.281	0	-0.14	6.85695	-11.527	PROM1|0.467	1	42	76	21829	http://www.ebi.ac.uk/QuickGO/GTerm?id=GO:0090183	[]
5	5	receptor clustering	GO:0043113	0.136	0.281	0	-0.14	6.85695	-11.527	CDH2|1.906	1	42	76	21829	http://www.ebi.ac.uk/QuickGO/GTerm?id=GO:0043113	[]
8	8	retinoid metabolic process	GO:0001523	0.136	0.281	0	-0.14	6.85695	-11.527	BCO1|0.596	1	42	76	21829	http://www.ebi.ac.uk/QuickGO/GTerm?id=GO:0001523	[]
7	7	hair cell differentiation	GO:0035315	0.136	0.281	0	-0.14	6.85695	-11.527	JAG1|1.703	1	42	76	21829	http://www.ebi.ac.uk/QuickGO/GTerm?id=GO:0035315	[]
6	4,5,6	positive regulation of carbohydrate metabolic process	GO:0045913	0.136	0.281	0	-0.14	6.85695	-11.527	IRS2|1.866	1	42	76	21829	http://www.ebi.ac.uk/QuickGO/GTerm?id=GO:0045913	[]
6	6	polysaccharide biosynthetic process	GO:0000271	0.136	0.281	0	-0.14	6.85695	-11.527	IRS2|1.866	1	42	76	21829	http://www.ebi.ac.uk/QuickGO/GTerm?id=GO:0000271	[]
5	4,5	nucleobase-containing small molecule metabolic process	GO:0055086	0.137	0.282	-1.2	-0.7	6.85695	-11.527	SLC25A25|0.627;PANK1|0.639;PPARGC1A|0.564;HKDC1|2.366;COX7C|0.658	5	783	76	21829	http://www.ebi.ac.uk/QuickGO/GTerm?id=GO:0055086	[]
6	6	anion transport	GO:0006820	0.137	0.282	-1.06	-0.63	6.85695	-11.527	SLC25A25|0.627;ACSL1|0.614;IRS2|1.866;SLC6A14|0.423	4	570	76	21829	http://www.ebi.ac.uk/QuickGO/GTerm?id=GO:0006820	[]
6	5,6	carbohydrate derivative transport	GO:1901264	0.139	0.284	0	-0.14	6.85695	-11.527	SLC25A25|0.627	1	43	76	21829	http://www.ebi.ac.uk/QuickGO/GTerm?id=GO:1901264	[]
5	5	endoplasmic reticulum organization	GO:0007029	0.139	0.284	0	-0.14	6.85695	-11.527	CAV2|0.417	1	43	76	21829	http://www.ebi.ac.uk/QuickGO/GTerm?id=GO:0007029	[]
6	5,6	negative regulation of cellular response to transforming growth factor beta stimulus	GO:1903845	0.139	0.284	0	-0.14	6.85695	-11.527	CAV2|0.417	1	43	76	21829	http://www.ebi.ac.uk/QuickGO/GTerm?id=GO:1903845	[]
7	7	diterpenoid metabolic process	GO:0016101	0.139	0.284	0	-0.14	6.85695	-11.527	BCO1|0.596	1	43	76	21829	http://www.ebi.ac.uk/QuickGO/GTerm?id=GO:0016101	[]
5	5	negative regulation of lipid biosynthetic process	GO:0051055	0.139	0.284	0	-0.14	6.85695	-11.527	SIK1|1.694	1	43	76	21829	http://www.ebi.ac.uk/QuickGO/GTerm?id=GO:0051055	[]
5	5	cranial nerve development	GO:0021545	0.139	0.284	0	-0.14	6.85695	-11.527	CDH2|1.906	1	43	76	21829	http://www.ebi.ac.uk/QuickGO/GTerm?id=GO:0021545	[]
6	6	nuclear division	GO:0000280	0.14	0.286	-1.02	-0.62	6.85695	-11.527	CAV2|0.417;SMC2|0.493;MZT1|0.461	3	372	76	21829	http://www.ebi.ac.uk/QuickGO/GTerm?id=GO:0000280	[]
4	4	mitotic cell cycle process	GO:1903047	0.14	0.286	-1.3	-0.74	6.85695	-11.527	CAV2|0.417;TOP2A|0.53;SMC2|0.493;MZT1|0.461	4	575	76	21829	http://www.ebi.ac.uk/QuickGO/GTerm?id=GO:1903047	[]
6	5,6	mitochondrial transport	GO:0006839	0.141	0.286	-1.06	-0.63	6.85695	-11.527	SLC25A25|0.627;OSCP1|0.14	2	189	76	21829	http://www.ebi.ac.uk/QuickGO/GTerm?id=GO:0006839	[]
3	3	positive regulation of transport	GO:0051050	0.141	0.287	0.56	0.12	6.85695	-11.527	CDH2|1.906;OSCP1|0.14;SGK2|0.559;IRS2|1.866	4	576	76	21829	http://www.ebi.ac.uk/QuickGO/GTerm?id=GO:0051050	[]
10	7,8,10	eye photoreceptor cell differentiation	GO:0001754	0.142	0.287	0	-0.14	6.85695	-11.527	SDK2|2.638	1	44	76	21829	http://www.ebi.ac.uk/QuickGO/GTerm?id=GO:0001754	[]
6	6	phospholipid catabolic process	GO:0009395	0.142	0.287	0	-0.14	6.85695	-11.527	ENPP2|0.6	1	44	76	21829	http://www.ebi.ac.uk/QuickGO/GTerm?id=GO:0009395	[]
7	7	positive regulation of macroautophagy	GO:0016239	0.142	0.287	0	-0.14	6.85695	-11.527	KIAA1324|5.521	1	44	76	21829	http://www.ebi.ac.uk/QuickGO/GTerm?id=GO:0016239	[]
8	7,8	mitochondrial ATP synthesis coupled electron transport	GO:0042775	0.142	0.287	0	-0.14	6.85695	-11.527	COX7C|0.658	1	44	76	21829	http://www.ebi.ac.uk/QuickGO/GTerm?id=GO:0042775	[]
4	4	interaction with symbiont	GO:0051702	0.142	0.287	0	-0.14	6.85695	-11.527	JUN|2.208	1	44	76	21829	http://www.ebi.ac.uk/QuickGO/GTerm?id=GO:0051702	[]
4	4	homeostatic process	GO:0042592	0.142	0.287	-1.14	-0.67	6.85695	-11.527	CDH2|1.906;PROM1|0.467;PPARGC1A|0.564;HKDC1|2.366;SGK2|0.559;KL|3.059;PDK4|0.421	7	1246	76	21829	http://www.ebi.ac.uk/QuickGO/GTerm?id=GO:0042592	[]
9	5,7,8,9	positive regulation of peptide secretion	GO:0002793	0.145	0.292	0	-0.14	6.85695	-11.527	IRS2|1.866	1	45	76	21829	http://www.ebi.ac.uk/QuickGO/GTerm?id=GO:0002793	[]
10	5,9,10	regulation of glucose transport	GO:0010827	0.145	0.292	0	-0.14	6.85695	-11.527	IRS2|1.866	1	45	76	21829	http://www.ebi.ac.uk/QuickGO/GTerm?id=GO:0010827	[]
11	5,6,8,9,10,11	positive regulation of peptide hormone secretion	GO:0090277	0.145	0.292	0	-0.14	6.85695	-11.527	IRS2|1.866	1	45	76	21829	http://www.ebi.ac.uk/QuickGO/GTerm?id=GO:0090277	[]
7	5,6,7	carbohydrate phosphorylation	GO:0046835	0.145	0.292	0	-0.14	6.85695	-11.527	HKDC1|2.366	1	45	76	21829	http://www.ebi.ac.uk/QuickGO/GTerm?id=GO:0046835	[]
6	6	regulation of proteolysis	GO:0030162	0.147	0.296	0	-0.14	6.85695	-11.527	CHAC1|0.521;CYR61|2.231;WFDC1|0.417;RNF144A|2.045	4	586	76	21829	http://www.ebi.ac.uk/QuickGO/GTerm?id=GO:0030162	[]
5	5	viral process	GO:0016032	0.148	0.296	0.04	-0.13	6.85695	-11.527	CAV2|0.417;JUN|2.208	2	195	76	21829	http://www.ebi.ac.uk/QuickGO/GTerm?id=GO:0016032	[]
6	6	sensory perception of pain	GO:0019233	0.148	0.296	0	-0.14	6.85695	-11.527	TRPA1|0.123	1	46	76	21829	http://www.ebi.ac.uk/QuickGO/GTerm?id=GO:0019233	[]
5	5	superoxide metabolic process	GO:0006801	0.148	0.296	0	-0.14	6.85695	-11.527	SOD3|0.184	1	46	76	21829	http://www.ebi.ac.uk/QuickGO/GTerm?id=GO:0006801	[]
6	6	terpenoid metabolic process	GO:0006721	0.148	0.296	0	-0.14	6.85695	-11.527	BCO1|0.596	1	46	76	21829	http://www.ebi.ac.uk/QuickGO/GTerm?id=GO:0006721	[]
4	4	circadian regulation of gene expression	GO:0032922	0.148	0.296	0	-0.14	6.85695	-11.527	PPARGC1A|0.564	1	46	76	21829	http://www.ebi.ac.uk/QuickGO/GTerm?id=GO:0032922	[]
7	5,6,7	negative regulation of ion transmembrane transport	GO:0034766	0.148	0.296	0	-0.14	6.85695	-11.527	IRS2|1.866	1	46	76	21829	http://www.ebi.ac.uk/QuickGO/GTerm?id=GO:0034766	[]
5	5	cofactor biosynthetic process	GO:0051188	0.149	0.297	-0.57	-0.41	6.85695	-11.527	PANK1|0.639;PDK4|0.421	2	196	76	21829	http://www.ebi.ac.uk/QuickGO/GTerm?id=GO:0051188	[]
4	4	developmental pigmentation	GO:0048066	0.151	0.299	0	-0.14	6.85695	-11.527	ADAMTS9|0.583	1	47	76	21829	http://www.ebi.ac.uk/QuickGO/GTerm?id=GO:0048066	[]
6	6	protein localization to cell surface	GO:0034394	0.151	0.299	0	-0.14	6.85695	-11.527	RIC3|0.491	1	47	76	21829	http://www.ebi.ac.uk/QuickGO/GTerm?id=GO:0034394	[]
7	6,7	morphogenesis of a polarized epithelium	GO:0001738	0.151	0.299	0	-0.14	6.85695	-11.527	ANKRD6|0.513	1	47	76	21829	http://www.ebi.ac.uk/QuickGO/GTerm?id=GO:0001738	[]
6	6	cellular response to ionizing radiation	GO:0071479	0.151	0.299	0	-0.14	6.85695	-11.527	EGR1|2.376	1	47	76	21829	http://www.ebi.ac.uk/QuickGO/GTerm?id=GO:0071479	[]
5	5	autonomic nervous system development	GO:0048483	0.151	0.299	0	-0.14	6.85695	-11.527	GFRA3|0.646	1	47	76	21829	http://www.ebi.ac.uk/QuickGO/GTerm?id=GO:0048483	[]
7	7	cellular response to interleukin-1	GO:0071347	0.151	0.299	0	-0.14	6.85695	-11.527	EGR1|2.376	1	47	76	21829	http://www.ebi.ac.uk/QuickGO/GTerm?id=GO:0071347	[]
7	7	transcription from RNA polymerase III promoter	GO:0006383	0.151	0.299	0	-0.14	6.85695	-11.527	CRCP|0.599	1	47	76	21829	http://www.ebi.ac.uk/QuickGO/GTerm?id=GO:0006383	[]
5	5	ion transport	GO:0006811	0.153	0.301	-2.84	-1.46	6.85695	-11.527	SLC25A25|0.627;ACSL1|0.614;ATP1A1|1.604;SIK1|1.694;SGK2|0.559;IRS2|1.866;SLC6A14|0.423;COX7C|0.658;TRPA1|0.123	9	1748	76	21829	http://www.ebi.ac.uk/QuickGO/GTerm?id=GO:0006811	[]
3	3	regulation of molecular function	GO:0065009	0.154	0.304	3.55	1.5	6.85695	-11.527	CAV2|0.417;ACSL1|0.614;MST1R|1.705;CYR61|2.231;JUN|2.208;PPARGC1A|0.564;WFDC1|0.417;SIK1|1.694;SGK2|0.559;IRS2|1.866;LPAR3|2.868;DUSP8|1.567	12	2494	76	21829	http://www.ebi.ac.uk/QuickGO/GTerm?id=GO:0065009	[]
6	6	mitotic spindle assembly	GO:0090307	0.154	0.304	0	-0.14	6.85695	-11.527	MZT1|0.461	1	48	76	21829	http://www.ebi.ac.uk/QuickGO/GTerm?id=GO:0090307	[]
7	6,7	ATP synthesis coupled electron transport	GO:0042773	0.157	0.309	0	-0.14	6.85695	-11.527	COX7C|0.658	1	49	76	21829	http://www.ebi.ac.uk/QuickGO/GTerm?id=GO:0042773	[]
8	8	lymphocyte apoptotic process	GO:0070227	0.157	0.309	0	-0.14	6.85695	-11.527	IRS2|1.866	1	49	76	21829	http://www.ebi.ac.uk/QuickGO/GTerm?id=GO:0070227	[]
5	4,5	cellular carbohydrate biosynthetic process	GO:0034637	0.157	0.309	0	-0.14	6.85695	-11.527	IRS2|1.866	1	49	76	21829	http://www.ebi.ac.uk/QuickGO/GTerm?id=GO:0034637	[]
7	7	negative regulation of kinase activity	GO:0033673	0.157	0.309	0.47	0.07	6.85695	-11.527	IRS2|1.866;DUSP8|1.567	2	203	76	21829	http://www.ebi.ac.uk/QuickGO/GTerm?id=GO:0033673	[]
6	6	hormone secretion	GO:0046879	0.16	0.312	1.04	0.34	6.85695	-11.527	CCK1R|5.905;IRS2|1.866	2	205	76	21829	http://www.ebi.ac.uk/QuickGO/GTerm?id=GO:0046879	[]
6	5,6	extrinsic apoptotic signaling pathway in absence of ligand	GO:0097192	0.16	0.312	0	-0.14	6.85695	-11.527	KIAA1324|5.521	1	50	76	21829	http://www.ebi.ac.uk/QuickGO/GTerm?id=GO:0097192	[]
9	7,8,9	regulation of B cell proliferation	GO:0030888	0.16	0.312	0	-0.14	6.85695	-11.527	IRS2|1.866	1	50	76	21829	http://www.ebi.ac.uk/QuickGO/GTerm?id=GO:0030888	[]
5	4,5	signal transduction in absence of ligand	GO:0038034	0.16	0.312	0	-0.14	6.85695	-11.527	KIAA1324|5.521	1	50	76	21829	http://www.ebi.ac.uk/QuickGO/GTerm?id=GO:0038034	[]
7	6,7	retina homeostasis	GO:0001895	0.16	0.312	0	-0.14	6.85695	-11.527	PROM1|0.467	1	50	76	21829	http://www.ebi.ac.uk/QuickGO/GTerm?id=GO:0001895	[]
5	5	artery morphogenesis	GO:0048844	0.16	0.312	0	-0.14	6.85695	-11.527	JAG1|1.703	1	50	76	21829	http://www.ebi.ac.uk/QuickGO/GTerm?id=GO:0048844	[]
8	7,8	regulation of anion transmembrane transport	GO:1903959	0.163	0.316	0	-0.14	6.85695	-11.527	IRS2|1.866	1	51	76	21829	http://www.ebi.ac.uk/QuickGO/GTerm?id=GO:1903959	[]
8	5,6,7,8	positive regulation of protein targeting to mitochondrion	GO:1903955	0.163	0.316	0	-0.14	6.85695	-11.527	OSCP1|0.14	1	51	76	21829	http://www.ebi.ac.uk/QuickGO/GTerm?id=GO:1903955	[]
8	7,8	regulation of leukocyte apoptotic process	GO:2000106	0.163	0.316	0	-0.14	6.85695	-11.527	IRS2|1.866	1	51	76	21829	http://www.ebi.ac.uk/QuickGO/GTerm?id=GO:2000106	[]
5	5	modification of morphology or physiology of other organism involved in symbiotic interaction	GO:0051817	0.163	0.316	0	-0.14	6.85695	-11.527	JUN|2.208	1	51	76	21829	http://www.ebi.ac.uk/QuickGO/GTerm?id=GO:0051817	[]
5	4,5	positive regulation of muscle tissue development	GO:1901863	0.163	0.316	0	-0.14	6.85695	-11.527	PPARGC1A|0.564	1	51	76	21829	http://www.ebi.ac.uk/QuickGO/GTerm?id=GO:1901863	[]
6	6	DNA conformation change	GO:0071103	0.164	0.317	-0.58	-0.41	6.85695	-11.527	TOP2A|0.53;SMC2|0.493	2	208	76	21829	http://www.ebi.ac.uk/QuickGO/GTerm?id=GO:0071103	[]
2	2	cellular process	GO:0009987	0.164	0.318	-23.19	-10.9	6.85695	-11.527	RIC3|0.491;LRFN5|1.736;NIM1K|1.617;CAV2|0.417;CERS6|0.346;ADAMTS9|0.583;CDH2|1.906;CTSK|2.109;SOD3|0.184;CDO1|0.672;PROM1|0.467;SLC25A25|0.627;CRCP|0.599;ACSL1|0.614;MST1R|1.705;SLC2A2|0.635;FAT1|0.605;GFRA3|0.646;CHAC1|0.521;ENPP2|0.6;EVC|0.468;ECI2|0.596;CYR61|2.231;PANK1|0.639;EGR1|2.376;JUN|2.208;PPARGC1A|0.564;TOP2A|0.53;RARA|1.526;SDK2|2.638;ATP1A1|1.604;FOS|3.316;IGFBP1|0.446;WFDC1|0.417;H…	68	18511	76	21829	http://www.ebi.ac.uk/QuickGO/GTerm?id=GO:0009987	[]
6	5,6	cardiac cell development	GO:0055006	0.166	0.319	0	-0.14	6.85695	-11.527	JAG1|1.703	1	52	76	21829	http://www.ebi.ac.uk/QuickGO/GTerm?id=GO:0055006	[]
7	6,7	lysosomal transport	GO:0007041	0.166	0.319	0	-0.14	6.85695	-11.527	SPTBN5|28.402	1	52	76	21829	http://www.ebi.ac.uk/QuickGO/GTerm?id=GO:0007041	[]
4	4	negative regulation of transmembrane transport	GO:0034763	0.166	0.319	0	-0.14	6.85695	-11.527	IRS2|1.866	1	52	76	21829	http://www.ebi.ac.uk/QuickGO/GTerm?id=GO:0034763	[]
4	4	mesenchymal cell proliferation	GO:0010463	0.166	0.319	0	-0.14	6.85695	-11.527	IRS2|1.866	1	52	76	21829	http://www.ebi.ac.uk/QuickGO/GTerm?id=GO:0010463	[]
9	5,6,7,8,9	microtubule polymerization	GO:0046785	0.166	0.319	0	-0.14	6.85695	-11.527	MZT1|0.461	1	52	76	21829	http://www.ebi.ac.uk/QuickGO/GTerm?id=GO:0046785	[]
6	6	serine family amino acid metabolic process	GO:0009069	0.166	0.319	0	-0.14	6.85695	-11.527	CDO1|0.672	1	52	76	21829	http://www.ebi.ac.uk/QuickGO/GTerm?id=GO:0009069	[]
8	4,6,7,8	positive regulation of establishment of protein localization to mitochondrion	GO:1903749	0.166	0.319	0	-0.14	6.85695	-11.527	OSCP1|0.14	1	52	76	21829	http://www.ebi.ac.uk/QuickGO/GTerm?id=GO:1903749	[]
5	5	organelle fission	GO:0048285	0.166	0.319	-1.02	-0.62	6.85695	-11.527	CAV2|0.417;SMC2|0.493;MZT1|0.461	3	404	76	21829	http://www.ebi.ac.uk/QuickGO/GTerm?id=GO:0048285	[]
6	5,6	hormone transport	GO:0009914	0.169	0.321	1.04	0.34	6.85695	-11.527	CCK1R|5.905;IRS2|1.866	2	212	76	21829	http://www.ebi.ac.uk/QuickGO/GTerm?id=GO:0009914	[]
8	6,8	regulation of metal ion transport	GO:0010959	0.169	0.321	0.02	-0.13	6.85695	-11.527	SIK1|1.694;SGK2|0.559	2	212	76	21829	http://www.ebi.ac.uk/QuickGO/GTerm?id=GO:0010959	[]
4	4	positive regulation of molecular function	GO:0044093	0.169	0.321	-0.29	-0.28	6.85695	-11.527	CAV2|0.417;ACSL1|0.614;MST1R|1.705;CYR61|2.231;JUN|2.208;PPARGC1A|0.564;SGK2|0.559;LPAR3|2.868	8	1546	76	21829	http://www.ebi.ac.uk/QuickGO/GTerm?id=GO:0044093	[]
5	4,5	SMAD protein signal transduction	GO:0060395	0.169	0.321	0	-0.14	6.85695	-11.527	FOS|3.316	1	53	76	21829	http://www.ebi.ac.uk/QuickGO/GTerm?id=GO:0060395	[]
7	7	regulation of protein processing	GO:0070613	0.169	0.321	0	-0.14	6.85695	-11.527	CHAC1|0.521	1	53	76	21829	http://www.ebi.ac.uk/QuickGO/GTerm?id=GO:0070613	[]
7	6,7	positive regulation of axonogenesis	GO:0050772	0.169	0.321	0	-0.14	6.85695	-11.527	LPAR3|2.868	1	53	76	21829	http://www.ebi.ac.uk/QuickGO/GTerm?id=GO:0050772	[]
6	6	regulation of protein maturation	GO:1903317	0.169	0.321	0	-0.14	6.85695	-11.527	CHAC1|0.521	1	53	76	21829	http://www.ebi.ac.uk/QuickGO/GTerm?id=GO:1903317	[]
6	5,6	regulation of bone mineralization	GO:0030500	0.169	0.321	0	-0.14	6.85695	-11.527	KL|3.059	1	53	76	21829	http://www.ebi.ac.uk/QuickGO/GTerm?id=GO:0030500	[]
6	5,6	glutathione metabolic process	GO:0006749	0.169	0.321	0	-0.14	6.85695	-11.527	CHAC1|0.521	1	53	76	21829	http://www.ebi.ac.uk/QuickGO/GTerm?id=GO:0006749	[]
4	4	synapse organization	GO:0050808	0.171	0.324	0.7	0.18	6.85695	-11.527	CDH2|1.906;SDK2|2.638	2	214	76	21829	http://www.ebi.ac.uk/QuickGO/GTerm?id=GO:0050808	[]
7	7	metal ion transport	GO:0030001	0.172	0.325	-0.43	-0.34	6.85695	-11.527	SLC25A25|0.627;ATP1A1|1.604;SIK1|1.694;SGK2|0.559;TRPA1|0.123	5	846	76	21829	http://www.ebi.ac.uk/QuickGO/GTerm?id=GO:0030001	[]
6	5,6	positive regulation of stem cell proliferation	GO:2000648	0.172	0.325	0	-0.14	6.85695	-11.527	IRS2|1.866	1	54	76	21829	http://www.ebi.ac.uk/QuickGO/GTerm?id=GO:2000648	[]
4	4	positive regulation of viral process	GO:0048524	0.172	0.325	0	-0.14	6.85695	-11.527	JUN|2.208	1	54	76	21829	http://www.ebi.ac.uk/QuickGO/GTerm?id=GO:0048524	[]
6	6	regulation of mitochondrion organization	GO:0010821	0.172	0.325	-1.1	-0.65	6.85695	-11.527	PPARGC1A|0.564;OSCP1|0.14	2	215	76	21829	http://www.ebi.ac.uk/QuickGO/GTerm?id=GO:0010821	[]
6	5,6	regulation of mitotic cell cycle	GO:0007346	0.173	0.327	-0.23	-0.25	6.85695	-11.527	CAV2|0.417;TOP2A|0.53;SIK1|1.694	3	412	76	21829	http://www.ebi.ac.uk/QuickGO/GTerm?id=GO:0007346	[]
6	5,6	skeletal system morphogenesis	GO:0048705	0.173	0.327	0.05	-0.12	6.85695	-11.527	CDH2|1.906;EVC|0.468	2	216	76	21829	http://www.ebi.ac.uk/QuickGO/GTerm?id=GO:0048705	[]
6	5,6	ventricular septum development	GO:0003281	0.175	0.328	0	-0.14	6.85695	-11.527	CYR61|2.231	1	55	76	21829	http://www.ebi.ac.uk/QuickGO/GTerm?id=GO:0003281	[]
7	4,7	execution phase of apoptosis	GO:0097194	0.175	0.328	0	-0.14	6.85695	-11.527	TOP2A|0.53	1	55	76	21829	http://www.ebi.ac.uk/QuickGO/GTerm?id=GO:0097194	[]
7	7	triglyceride metabolic process	GO:0006641	0.175	0.328	0	-0.14	6.85695	-11.527	SIK1|1.694	1	55	76	21829	http://www.ebi.ac.uk/QuickGO/GTerm?id=GO:0006641	[]
5	5	proteolysis	GO:0006508	0.175	0.329	1.14	0.39	6.85695	-11.527	ADAMTS1|1.877;ADAMTS9|0.583;CTSK|2.109;CHAC1|0.521;CYR61|2.231;WFDC1|0.417;LAP3|0.573;RNF144A|2.045;AEBP1|2.049	9	1807	76	21829	http://www.ebi.ac.uk/QuickGO/GTerm?id=GO:0006508	[]
5	5	regulation of epithelial cell proliferation	GO:0050678	0.177	0.331	0.05	-0.12	6.85695	-11.527	CAV2|0.417;MCC|2.125	2	219	76	21829	http://www.ebi.ac.uk/QuickGO/GTerm?id=GO:0050678	[]
7	7	receptor-mediated endocytosis	GO:0006898	0.177	0.331	-0.6	-0.42	6.85695	-11.527	CAV2|0.417;ENPP2|0.6	2	219	76	21829	http://www.ebi.ac.uk/QuickGO/GTerm?id=GO:0006898	[]
10	9,10	glucose import	GO:0046323	0.178	0.331	0	-0.14	6.85695	-11.527	IRS2|1.866	1	56	76	21829	http://www.ebi.ac.uk/QuickGO/GTerm?id=GO:0046323	[]
6	5,6	cardiac ventricle morphogenesis	GO:0003208	0.178	0.331	0	-0.14	6.85695	-11.527	JAG1|1.703	1	56	76	21829	http://www.ebi.ac.uk/QuickGO/GTerm?id=GO:0003208	[]
7	6,7	positive regulation of protein kinase B signaling	GO:0051897	0.178	0.331	0	-0.14	6.85695	-11.527	MST1R|1.705	1	56	76	21829	http://www.ebi.ac.uk/QuickGO/GTerm?id=GO:0051897	[]
9	5,6,7,8,9	negative regulation of BMP signaling pathway	GO:0030514	0.178	0.331	0	-0.14	6.85695	-11.527	CHRDL1|0.429	1	56	76	21829	http://www.ebi.ac.uk/QuickGO/GTerm?id=GO:0030514	[]
5	4,5	positive regulation of cellular component organization	GO:0051130	0.178	0.331	1.1	0.37	6.85695	-11.527	CDH2|1.906;PPARGC1A|0.564;KIAA1324|5.521;OSCP1|0.14;LPAR3|2.868	5	856	76	21829	http://www.ebi.ac.uk/QuickGO/GTerm?id=GO:0051130	[]
6	6	glycerophospholipid metabolic process	GO:0006650	0.178	0.332	-0.01	-0.14	6.85695	-11.527	ENPP2|0.6;AGPAT2|1.693	2	220	76	21829	http://www.ebi.ac.uk/QuickGO/GTerm?id=GO:0006650	[]
5	4,5	nuclear chromosome segregation	GO:0098813	0.178	0.332	-0.58	-0.41	6.85695	-11.527	TOP2A|0.53;SMC2|0.493	2	220	76	21829	http://www.ebi.ac.uk/QuickGO/GTerm?id=GO:0098813	[]
4	4	cellular amino acid metabolic process	GO:0006520	0.178	0.332	-0.26	-0.26	6.85695	-11.527	CDO1|0.672;PIPOX|1.809;SLC6A14|0.423	3	418	76	21829	http://www.ebi.ac.uk/QuickGO/GTerm?id=GO:0006520	[]
8	6,7,8	endochondral bone morphogenesis	GO:0060350	0.18	0.333	0	-0.14	6.85695	-11.527	EVC|0.468	1	57	76	21829	http://www.ebi.ac.uk/QuickGO/GTerm?id=GO:0060350	[]
6	6	long-chain fatty acid metabolic process	GO:0001676	0.18	0.333	0	-0.14	6.85695	-11.527	ACSL1|0.614	1	57	76	21829	http://www.ebi.ac.uk/QuickGO/GTerm?id=GO:0001676	[]
9	7,9	regulation of gliogenesis	GO:0014013	0.18	0.333	0	-0.14	6.85695	-11.527	CDH2|1.906	1	57	76	21829	http://www.ebi.ac.uk/QuickGO/GTerm?id=GO:0014013	[]
4	4	negative regulation of lipid metabolic process	GO:0045833	0.18	0.333	0	-0.14	6.85695	-11.527	SIK1|1.694	1	57	76	21829	http://www.ebi.ac.uk/QuickGO/GTerm?id=GO:0045833	[]
8	7,8	muscle fiber development	GO:0048747	0.18	0.333	0	-0.14	6.85695	-11.527	CAV2|0.417	1	57	76	21829	http://www.ebi.ac.uk/QuickGO/GTerm?id=GO:0048747	[]
5	5	regulation of biomineral tissue development	GO:0070167	0.18	0.333	0	-0.14	6.85695	-11.527	KL|3.059	1	57	76	21829	http://www.ebi.ac.uk/QuickGO/GTerm?id=GO:0070167	[]
8	7,8	regulation of protein targeting to mitochondrion	GO:1903214	0.18	0.333	0	-0.14	6.85695	-11.527	OSCP1|0.14	1	57	76	21829	http://www.ebi.ac.uk/QuickGO/GTerm?id=GO:1903214	[]
7	7	monovalent inorganic cation transport	GO:0015672	0.182	0.335	0	-0.14	6.85695	-11.527	ATP1A1|1.604;SIK1|1.694;SGK2|0.559;COX7C|0.658	4	638	76	21829	http://www.ebi.ac.uk/QuickGO/GTerm?id=GO:0015672	[]
4	4	endomembrane system organization	GO:0010256	0.183	0.335	0.38	0.03	6.85695	-11.527	CAV2|0.417;CDH2|1.906;SPTBN5|28.402	3	423	76	21829	http://www.ebi.ac.uk/QuickGO/GTerm?id=GO:0010256	[]
6	4,5,6	positive regulation of transporter activity	GO:0032411	0.183	0.335	0	-0.14	6.85695	-11.527	SGK2|0.559	1	58	76	21829	http://www.ebi.ac.uk/QuickGO/GTerm?id=GO:0032411	[]
4	4	meiotic chromosome segregation	GO:0045132	0.183	0.335	0	-0.14	6.85695	-11.527	TOP2A|0.53	1	58	76	21829	http://www.ebi.ac.uk/QuickGO/GTerm?id=GO:0045132	[]
4	4	neural retina development	GO:0003407	0.183	0.335	0	-0.14	6.85695	-11.527	SDK2|2.638	1	58	76	21829	http://www.ebi.ac.uk/QuickGO/GTerm?id=GO:0003407	[]
6	4,6	outflow tract morphogenesis	GO:0003151	0.183	0.335	0	-0.14	6.85695	-11.527	JAG1|1.703	1	58	76	21829	http://www.ebi.ac.uk/QuickGO/GTerm?id=GO:0003151	[]
4	4	localization within membrane	GO:0051668	0.183	0.335	0	-0.14	6.85695	-11.527	CDH2|1.906	1	58	76	21829	http://www.ebi.ac.uk/QuickGO/GTerm?id=GO:0051668	[]
9	7,9	photoreceptor cell differentiation	GO:0046530	0.183	0.335	0	-0.14	6.85695	-11.527	SDK2|2.638	1	58	76	21829	http://www.ebi.ac.uk/QuickGO/GTerm?id=GO:0046530	[]
6	6	aspartate family amino acid metabolic process	GO:0009066	0.183	0.335	0	-0.14	6.85695	-11.527	PIPOX|1.809	1	58	76	21829	http://www.ebi.ac.uk/QuickGO/GTerm?id=GO:0009066	[]
6	6	response to interleukin-1	GO:0070555	0.183	0.335	0	-0.14	6.85695	-11.527	EGR1|2.376	1	58	76	21829	http://www.ebi.ac.uk/QuickGO/GTerm?id=GO:0070555	[]
6	6	positive regulation of proteolysis	GO:0045862	0.185	0.337	0.66	0.16	6.85695	-11.527	CYR61|2.231;RNF144A|2.045	2	225	76	21829	http://www.ebi.ac.uk/QuickGO/GTerm?id=GO:0045862	[]
7	7	non-canonical Wnt signaling pathway	GO:0035567	0.186	0.338	0	-0.14	6.85695	-11.527	ANKRD6|0.513	1	59	76	21829	http://www.ebi.ac.uk/QuickGO/GTerm?id=GO:0035567	[]
6	6	response to calcium ion	GO:0051592	0.186	0.338	0	-0.14	6.85695	-11.527	FOS|3.316	1	59	76	21829	http://www.ebi.ac.uk/QuickGO/GTerm?id=GO:0051592	[]
12	7,8,9,10,11,12	negative regulation of MAP kinase activity	GO:0043407	0.186	0.338	0	-0.14	6.85695	-11.527	DUSP8|1.567	1	59	76	21829	http://www.ebi.ac.uk/QuickGO/GTerm?id=GO:0043407	[]
7	5,7	oxidative phosphorylation	GO:0006119	0.186	0.338	0	-0.14	6.85695	-11.527	COX7C|0.658	1	59	76	21829	http://www.ebi.ac.uk/QuickGO/GTerm?id=GO:0006119	[]
5	5	response to hydrogen peroxide	GO:0042542	0.186	0.338	0	-0.14	6.85695	-11.527	TRPA1|0.123	1	59	76	21829	http://www.ebi.ac.uk/QuickGO/GTerm?id=GO:0042542	[]
4	4	symbiosis, encompassing mutualism through parasitism	GO:0044403	0.187	0.339	0.04	-0.13	6.85695	-11.527	CAV2|0.417;JUN|2.208	2	227	76	21829	http://www.ebi.ac.uk/QuickGO/GTerm?id=GO:0044403	[]
8	7,8	regulation of transcription from RNA polymerase II promoter	GO:0006357	0.188	0.341	2.75	1.13	6.85695	-11.527	CYR61|2.231;EGR1|2.376;JUN|2.208;PPARGC1A|0.564;FOS|3.316;CHRDL1|0.429;AEBP1|2.049;JAG1|1.703	8	1592	76	21829	http://www.ebi.ac.uk/QuickGO/GTerm?id=GO:0006357	[]
5	5	negative regulation of angiogenesis	GO:0016525	0.189	0.341	0	-0.14	6.85695	-11.527	CRHR2|2.007	1	60	76	21829	http://www.ebi.ac.uk/QuickGO/GTerm?id=GO:0016525	[]
9	6,7,8,9	positive regulation of B cell activation	GO:0050871	0.189	0.341	0	-0.14	6.85695	-11.527	IRS2|1.866	1	60	76	21829	http://www.ebi.ac.uk/QuickGO/GTerm?id=GO:0050871	[]
5	5	bone remodeling	GO:0046849	0.189	0.341	0	-0.14	6.85695	-11.527	PDK4|0.421	1	60	76	21829	http://www.ebi.ac.uk/QuickGO/GTerm?id=GO:0046849	[]
7	6,7	regulation of establishment of protein localization to mitochondrion	GO:1903747	0.189	0.341	0	-0.14	6.85695	-11.527	OSCP1|0.14	1	60	76	21829	http://www.ebi.ac.uk/QuickGO/GTerm?id=GO:1903747	[]
4	3,4	ovulation cycle process	GO:0022602	0.189	0.341	0	-0.14	6.85695	-11.527	ADAMTS1|1.877	1	60	76	21829	http://www.ebi.ac.uk/QuickGO/GTerm?id=GO:0022602	[]
7	5,7	cellular response to hypoxia	GO:0071456	0.192	0.345	0	-0.14	6.85695	-11.527	EGR1|2.376	1	61	76	21829	http://www.ebi.ac.uk/QuickGO/GTerm?id=GO:0071456	[]
10	9,10	ATP biosynthetic process	GO:0006754	0.192	0.345	0	-0.14	6.85695	-11.527	PPARGC1A|0.564	1	61	76	21829	http://www.ebi.ac.uk/QuickGO/GTerm?id=GO:0006754	[]
11	9,10,11	activation of protein kinase activity	GO:0032147	0.192	0.345	0.8	0.23	6.85695	-11.527	JUN|2.208;LPAR3|2.868	2	231	76	21829	http://www.ebi.ac.uk/QuickGO/GTerm?id=GO:0032147	[]
6	5,6	cell morphogenesis involved in differentiation	GO:0000904	0.193	0.346	1.66	0.63	6.85695	-11.527	LRFN5|1.736;GFRA3|0.646;CCK1R|5.905;LPAR3|2.868	4	653	76	21829	http://www.ebi.ac.uk/QuickGO/GTerm?id=GO:0000904	[]
7	5,6,7	positive regulation of macromolecule biosynthetic process	GO:0010557	0.194	0.348	2.34	0.94	6.85695	-11.527	CYR61|2.231;EGR1|2.376;JUN|2.208;PPARGC1A|0.564;FOS|3.316;IRS2|1.866;JAG1|1.703	7	1360	76	21829	http://www.ebi.ac.uk/QuickGO/GTerm?id=GO:0010557	[]
5	5	mitotic DNA integrity checkpoint	GO:0044774	0.195	0.348	0	-0.14	6.85695	-11.527	TOP2A|0.53	1	62	76	21829	http://www.ebi.ac.uk/QuickGO/GTerm?id=GO:0044774	[]
6	6	cellular response to decreased oxygen levels	GO:0036294	0.195	0.348	0	-0.14	6.85695	-11.527	EGR1|2.376	1	62	76	21829	http://www.ebi.ac.uk/QuickGO/GTerm?id=GO:0036294	[]
9	6,7,8,9	neural crest cell development	GO:0014032	0.195	0.348	0	-0.14	6.85695	-11.527	JAG1|1.703	1	62	76	21829	http://www.ebi.ac.uk/QuickGO/GTerm?id=GO:0014032	[]
5	5	negative regulation of blood vessel morphogenesis	GO:2000181	0.195	0.348	0	-0.14	6.85695	-11.527	CRHR2|2.007	1	62	76	21829	http://www.ebi.ac.uk/QuickGO/GTerm?id=GO:2000181	[]
6	6	negative regulation of transferase activity	GO:0051348	0.197	0.35	0.47	0.07	6.85695	-11.527	IRS2|1.866;DUSP8|1.567	2	235	76	21829	http://www.ebi.ac.uk/QuickGO/GTerm?id=GO:0051348	[]
5	5	glycogen metabolic process	GO:0005977	0.198	0.35	0	-0.14	6.85695	-11.527	IRS2|1.866	1	63	76	21829	http://www.ebi.ac.uk/QuickGO/GTerm?id=GO:0005977	[]
6	6	glucan metabolic process	GO:0044042	0.198	0.35	0	-0.14	6.85695	-11.527	IRS2|1.866	1	63	76	21829	http://www.ebi.ac.uk/QuickGO/GTerm?id=GO:0044042	[]
5	5	response to organophosphorus	GO:0046683	0.198	0.35	0	-0.14	6.85695	-11.527	JUN|2.208	1	63	76	21829	http://www.ebi.ac.uk/QuickGO/GTerm?id=GO:0046683	[]
3	3	ovulation cycle	GO:0042698	0.198	0.35	0	-0.14	6.85695	-11.527	ADAMTS1|1.877	1	63	76	21829	http://www.ebi.ac.uk/QuickGO/GTerm?id=GO:0042698	[]
4	4	modification of morphology or physiology of other organism	GO:0035821	0.198	0.35	0	-0.14	6.85695	-11.527	JUN|2.208	1	63	76	21829	http://www.ebi.ac.uk/QuickGO/GTerm?id=GO:0035821	[]
7	6,7	cellular glucan metabolic process	GO:0006073	0.198	0.35	0	-0.14	6.85695	-11.527	IRS2|1.866	1	63	76	21829	http://www.ebi.ac.uk/QuickGO/GTerm?id=GO:0006073	[]
5	5	peripheral nervous system development	GO:0007422	0.198	0.35	0	-0.14	6.85695	-11.527	SLC5A3|1.572	1	63	76	21829	http://www.ebi.ac.uk/QuickGO/GTerm?id=GO:0007422	[]
5	5	skeletal system development	GO:0001501	0.198	0.35	0.33	0.01	6.85695	-11.527	CDH2|1.906;EVC|0.468;CYR61|2.231	3	440	76	21829	http://www.ebi.ac.uk/QuickGO/GTerm?id=GO:0001501	[]
6	4,6	regulation of hemopoiesis	GO:1903706	0.199	0.351	0.75	0.21	6.85695	-11.527	FOS|3.316;JAG1|1.703	2	236	76	21829	http://www.ebi.ac.uk/QuickGO/GTerm?id=GO:1903706	[]
3	3	interspecies interaction between organisms	GO:0044419	0.2	0.353	0.04	-0.13	6.85695	-11.527	CAV2|0.417;JUN|2.208	2	237	76	21829	http://www.ebi.ac.uk/QuickGO/GTerm?id=GO:0044419	[]
5	5	artery development	GO:0060840	0.2	0.353	0	-0.14	6.85695	-11.527	JAG1|1.703	1	64	76	21829	http://www.ebi.ac.uk/QuickGO/GTerm?id=GO:0060840	[]
6	5,6	negative regulation of inflammatory response	GO:0050728	0.2	0.353	0	-0.14	6.85695	-11.527	WFDC1|0.417	1	64	76	21829	http://www.ebi.ac.uk/QuickGO/GTerm?id=GO:0050728	[]
4	4	multicellular organismal response to stress	GO:0033555	0.2	0.353	0	-0.14	6.85695	-11.527	TRPA1|0.123	1	64	76	21829	http://www.ebi.ac.uk/QuickGO/GTerm?id=GO:0033555	[]
5	5	central nervous system development	GO:0007417	0.201	0.353	1.51	0.56	6.85695	-11.527	CDH2|1.906;RARA|1.526;CCK1R|5.905;IRS2|1.866	4	664	76	21829	http://www.ebi.ac.uk/QuickGO/GTerm?id=GO:0007417	[]
5	5	positive regulation of organelle organization	GO:0010638	0.202	0.356	-0.74	-0.49	6.85695	-11.527	PPARGC1A|0.564;KIAA1324|5.521;OSCP1|0.14	3	445	76	21829	http://www.ebi.ac.uk/QuickGO/GTerm?id=GO:0010638	[]
7	5,6,7	positive regulation of cellular amide metabolic process	GO:0034250	0.203	0.356	0	-0.14	6.85695	-11.527	CYR61|2.231	1	65	76	21829	http://www.ebi.ac.uk/QuickGO/GTerm?id=GO:0034250	[]
11	8,9,10,11	positive regulation of proteasomal ubiquitin-dependent protein catabolic process	GO:0032436	0.203	0.356	0	-0.14	6.85695	-11.527	RNF144A|2.045	1	65	76	21829	http://www.ebi.ac.uk/QuickGO/GTerm?id=GO:0032436	[]
6	6	acylglycerol metabolic process	GO:0006639	0.203	0.356	0	-0.14	6.85695	-11.527	SIK1|1.694	1	65	76	21829	http://www.ebi.ac.uk/QuickGO/GTerm?id=GO:0006639	[]
4	3,4	developmental growth	GO:0048589	0.203	0.356	-0.46	-0.35	6.85695	-11.527	SLC25A25|0.627;EVC|0.468;LPAR3|2.868	3	446	76	21829	http://www.ebi.ac.uk/QuickGO/GTerm?id=GO:0048589	[]
6	5,6	plasma membrane organization	GO:0007009	0.205	0.357	0.1	-0.1	6.85695	-11.527	CAV2|0.417;CDH2|1.906	2	241	76	21829	http://www.ebi.ac.uk/QuickGO/GTerm?id=GO:0007009	[]
8	8	osteoclast differentiation	GO:0030316	0.206	0.357	0	-0.14	6.85695	-11.527	FOS|3.316	1	66	76	21829	http://www.ebi.ac.uk/QuickGO/GTerm?id=GO:0030316	[]
5	5	neutral lipid metabolic process	GO:0006638	0.206	0.357	0	-0.14	6.85695	-11.527	SIK1|1.694	1	66	76	21829	http://www.ebi.ac.uk/QuickGO/GTerm?id=GO:0006638	[]
4	4	negative regulation of vasculature development	GO:1901343	0.206	0.357	0	-0.14	6.85695	-11.527	CRHR2|2.007	1	66	76	21829	http://www.ebi.ac.uk/QuickGO/GTerm?id=GO:1901343	[]
4	4	tricarboxylic acid cycle	GO:0006099	0.206	0.357	0	-0.14	6.85695	-11.527	CS|1.611	1	66	76	21829	http://www.ebi.ac.uk/QuickGO/GTerm?id=GO:0006099	[]
6	6	regulation of endothelial cell proliferation	GO:0001936	0.206	0.357	0	-0.14	6.85695	-11.527	CAV2|0.417	1	66	76	21829	http://www.ebi.ac.uk/QuickGO/GTerm?id=GO:0001936	[]
7	7	leukocyte apoptotic process	GO:0071887	0.206	0.357	0	-0.14	6.85695	-11.527	IRS2|1.866	1	66	76	21829	http://www.ebi.ac.uk/QuickGO/GTerm?id=GO:0071887	[]
6	6	cellular biogenic amine metabolic process	GO:0006576	0.206	0.357	0	-0.14	6.85695	-11.527	ENPP2|0.6	1	66	76	21829	http://www.ebi.ac.uk/QuickGO/GTerm?id=GO:0006576	[]
6	5,6	regulation of extent of cell growth	GO:0061387	0.206	0.357	0	-0.14	6.85695	-11.527	LPAR3|2.868	1	66	76	21829	http://www.ebi.ac.uk/QuickGO/GTerm?id=GO:0061387	[]
3	3	feeding behavior	GO:0007631	0.206	0.357	0	-0.14	6.85695	-11.527	CCK1R|5.905	1	66	76	21829	http://www.ebi.ac.uk/QuickGO/GTerm?id=GO:0007631	[]
7	5,6,7	stem cell development	GO:0048864	0.206	0.357	0.51	0.1	6.85695	-11.527	CDH2|1.906;JAG1|1.703	2	242	76	21829	http://www.ebi.ac.uk/QuickGO/GTerm?id=GO:0048864	[]
8	4,7,8	regulation of sequence-specific DNA binding transcription factor activity	GO:0051090	0.206	0.357	0.02	-0.13	6.85695	-11.527	PPARGC1A|0.564;SIK1|1.694	2	242	76	21829	http://www.ebi.ac.uk/QuickGO/GTerm?id=GO:0051090	[]
7	6,7	regulation of transforming growth factor beta receptor signaling pathway	GO:0017015	0.209	0.36	0	-0.14	6.85695	-11.527	CAV2|0.417	1	67	76	21829	http://www.ebi.ac.uk/QuickGO/GTerm?id=GO:0017015	[]
4	4	cellular aldehyde metabolic process	GO:0006081	0.209	0.36	0	-0.14	6.85695	-11.527	BCO1|0.596	1	67	76	21829	http://www.ebi.ac.uk/QuickGO/GTerm?id=GO:0006081	[]
6	4,6	negative regulation of ion transport	GO:0043271	0.209	0.36	0	-0.14	6.85695	-11.527	IRS2|1.866	1	67	76	21829	http://www.ebi.ac.uk/QuickGO/GTerm?id=GO:0043271	[]
8	8	gluconeogenesis	GO:0006094	0.209	0.36	0	-0.14	6.85695	-11.527	SIK1|1.694	1	67	76	21829	http://www.ebi.ac.uk/QuickGO/GTerm?id=GO:0006094	[]
6	6	regulation of striated muscle cell differentiation	GO:0051153	0.209	0.36	0	-0.14	6.85695	-11.527	SIK1|1.694	1	67	76	21829	http://www.ebi.ac.uk/QuickGO/GTerm?id=GO:0051153	[]
7	7	cation homeostasis	GO:0055080	0.21	0.362	-0.49	-0.37	6.85695	-11.527	SGK2|0.559;KL|3.059;PDK4|0.421	3	454	76	21829	http://www.ebi.ac.uk/QuickGO/GTerm?id=GO:0055080	[]
6	5,6	regulation of cellular response to transforming growth factor beta stimulus	GO:1903844	0.211	0.363	0	-0.14	6.85695	-11.527	CAV2|0.417	1	68	76	21829	http://www.ebi.ac.uk/QuickGO/GTerm?id=GO:1903844	[]
5	5	cellular response to oxygen levels	GO:0071453	0.211	0.363	0	-0.14	6.85695	-11.527	EGR1|2.376	1	68	76	21829	http://www.ebi.ac.uk/QuickGO/GTerm?id=GO:0071453	[]
4	4	interaction with host	GO:0051701	0.211	0.363	0	-0.14	6.85695	-11.527	CAV2|0.417	1	68	76	21829	http://www.ebi.ac.uk/QuickGO/GTerm?id=GO:0051701	[]
8	7,8	neural crest cell differentiation	GO:0014033	0.211	0.363	0	-0.14	6.85695	-11.527	JAG1|1.703	1	68	76	21829	http://www.ebi.ac.uk/QuickGO/GTerm?id=GO:0014033	[]
5	5	regulation of lipid transport	GO:0032368	0.214	0.364	0	-0.14	6.85695	-11.527	IRS2|1.866	1	69	76	21829	http://www.ebi.ac.uk/QuickGO/GTerm?id=GO:0032368	[]
6	5,6	regulation of smoothened signaling pathway	GO:0008589	0.214	0.364	0	-0.14	6.85695	-11.527	EVC|0.468	1	69	76	21829	http://www.ebi.ac.uk/QuickGO/GTerm?id=GO:0008589	[]
6	6	response to purine-containing compound	GO:0014074	0.214	0.364	0	-0.14	6.85695	-11.527	JUN|2.208	1	69	76	21829	http://www.ebi.ac.uk/QuickGO/GTerm?id=GO:0014074	[]
7	7	endothelial cell differentiation	GO:0045446	0.214	0.364	0	-0.14	6.85695	-11.527	JAG1|1.703	1	69	76	21829	http://www.ebi.ac.uk/QuickGO/GTerm?id=GO:0045446	[]
8	8	citrate metabolic process	GO:0006101	0.214	0.364	0	-0.14	6.85695	-11.527	CS|1.611	1	69	76	21829	http://www.ebi.ac.uk/QuickGO/GTerm?id=GO:0006101	[]
5	5	regulation of neural precursor cell proliferation	GO:2000177	0.214	0.364	0	-0.14	6.85695	-11.527	CDH2|1.906	1	69	76	21829	http://www.ebi.ac.uk/QuickGO/GTerm?id=GO:2000177	[]
5	5	inner ear receptor cell differentiation	GO:0060113	0.214	0.364	0	-0.14	6.85695	-11.527	JAG1|1.703	1	69	76	21829	http://www.ebi.ac.uk/QuickGO/GTerm?id=GO:0060113	[]
7	4,7	positive regulation of hormone secretion	GO:0046887	0.214	0.364	0	-0.14	6.85695	-11.527	IRS2|1.866	1	69	76	21829	http://www.ebi.ac.uk/QuickGO/GTerm?id=GO:0046887	[]
6	6	positive regulation of autophagy	GO:0010508	0.214	0.364	0	-0.14	6.85695	-11.527	KIAA1324|5.521	1	69	76	21829	http://www.ebi.ac.uk/QuickGO/GTerm?id=GO:0010508	[]
6	6	cellular response to metal ion	GO:0071248	0.214	0.364	0	-0.14	6.85695	-11.527	FOS|3.316	1	69	76	21829	http://www.ebi.ac.uk/QuickGO/GTerm?id=GO:0071248	[]
3	3	regulation of localization	GO:0032879	0.215	0.365	3.56	1.51	6.85695	-11.527	CDH2|1.906;ENPP2|0.6;CYR61|2.231;SIK1|1.694;CCK1R|5.905;OSCP1|0.14;SGK2|0.559;IRS2|1.866;MCC|2.125	9	1903	76	21829	http://www.ebi.ac.uk/QuickGO/GTerm?id=GO:0032879	[]
4	4	movement of cell or subcellular component	GO:0006928	0.215	0.365	2.41	0.98	6.85695	-11.527	CDH2|1.906;GFRA3|0.646;ENPP2|0.6;CYR61|2.231;CCK1R|5.905;IRS2|1.866;MCC|2.125	7	1403	76	21829	http://www.ebi.ac.uk/QuickGO/GTerm?id=GO:0006928	[]
7	6,7	neuron projection development	GO:0031175	0.217	0.366	1.66	0.63	6.85695	-11.527	LRFN5|1.736;GFRA3|0.646;CCK1R|5.905;LPAR3|2.868	4	686	76	21829	http://www.ebi.ac.uk/QuickGO/GTerm?id=GO:0031175	[]
6	6	autophagosome assembly	GO:0000045	0.217	0.366	0	-0.14	6.85695	-11.527	KIAA1324|5.521	1	70	76	21829	http://www.ebi.ac.uk/QuickGO/GTerm?id=GO:0000045	[]
9	8,9	cellular monovalent inorganic cation homeostasis	GO:0030004	0.217	0.366	0	-0.14	6.85695	-11.527	SGK2|0.559	1	70	76	21829	http://www.ebi.ac.uk/QuickGO/GTerm?id=GO:0030004	[]
4	4	nerve development	GO:0021675	0.217	0.366	0	-0.14	6.85695	-11.527	CDH2|1.906	1	70	76	21829	http://www.ebi.ac.uk/QuickGO/GTerm?id=GO:0021675	[]
7	7	hexose biosynthetic process	GO:0019319	0.22	0.37	0	-0.14	6.85695	-11.527	SIK1|1.694	1	71	76	21829	http://www.ebi.ac.uk/QuickGO/GTerm?id=GO:0019319	[]
7	5,6,7	regulation of cartilage development	GO:0061035	0.22	0.37	0	-0.14	6.85695	-11.527	CYR61|2.231	1	71	76	21829	http://www.ebi.ac.uk/QuickGO/GTerm?id=GO:0061035	[]
7	7	transcription from RNA polymerase II promoter	GO:0006366	0.221	0.373	2.75	1.13	6.85695	-11.527	CYR61|2.231;EGR1|2.376;JUN|2.208;PPARGC1A|0.564;FOS|3.316;CHRDL1|0.429;AEBP1|2.049;JAG1|1.703	8	1664	76	21829	http://www.ebi.ac.uk/QuickGO/GTerm?id=GO:0006366	[]
7	7	inorganic ion homeostasis	GO:0098771	0.222	0.374	-0.49	-0.37	6.85695	-11.527	SGK2|0.559;KL|3.059;PDK4|0.421	3	467	76	21829	http://www.ebi.ac.uk/QuickGO/GTerm?id=GO:0098771	[]
7	6,7	B cell proliferation	GO:0042100	0.222	0.374	0	-0.14	6.85695	-11.527	IRS2|1.866	1	72	76	21829	http://www.ebi.ac.uk/QuickGO/GTerm?id=GO:0042100	[]
5	5	isoprenoid metabolic process	GO:0006720	0.222	0.374	0	-0.14	6.85695	-11.527	BCO1|0.596	1	72	76	21829	http://www.ebi.ac.uk/QuickGO/GTerm?id=GO:0006720	[]
3	3	cell adhesion	GO:0007155	0.223	0.374	1.94	0.76	6.85695	-11.527	CDH2|1.906;FAT1|0.605;CYR61|2.231;EGR1|2.376;SDK2|2.638;CDHR5|0.509	6	1172	76	21829	http://www.ebi.ac.uk/QuickGO/GTerm?id=GO:0007155	[]
5	4,5	regulation of macromolecule metabolic process	GO:0060255	0.223	0.375	6.94	3.07	6.85695	-11.527	CAV2|0.417;CDH2|1.906;ACSL1|0.614;MST1R|1.705;CHAC1|0.521;CYR61|2.231;EGR1|2.376;JUN|2.208;PPARGC1A|0.564;RARA|1.526;FOS|3.316;WFDC1|0.417;SIK1|1.694;CHRDL1|0.429;IRS2|1.866;KL|3.059;RNF144A|2.045;LPAR3|2.868;AEBP1|2.049;ANKRD6|0.513;DUSP8|1.567;JAG1|1.703	22	5367	76	21829	http://www.ebi.ac.uk/QuickGO/GTerm?id=GO:0060255	[]
5	5	response to cytokine	GO:0034097	0.224	0.375	0.21	-0.04	6.85695	-11.527	ACSL1|0.614;EGR1|2.376;JUN|2.208	3	469	76	21829	http://www.ebi.ac.uk/QuickGO/GTerm?id=GO:0034097	[]
2	2	biological adhesion	GO:0022610	0.225	0.376	1.94	0.76	6.85695	-11.527	CDH2|1.906;FAT1|0.605;CYR61|2.231;EGR1|2.376;SDK2|2.638;CDHR5|0.509	6	1175	76	21829	http://www.ebi.ac.uk/QuickGO/GTerm?id=GO:0022610	[]
4	4	cellular hormone metabolic process	GO:0034754	0.225	0.376	0	-0.14	6.85695	-11.527	BCO1|0.596	1	73	76	21829	http://www.ebi.ac.uk/QuickGO/GTerm?id=GO:0034754	[]
9	6,7,8,9	negative regulation of extrinsic apoptotic signaling pathway	GO:2001237	0.225	0.376	0	-0.14	6.85695	-11.527	KIAA1324|5.521	1	73	76	21829	http://www.ebi.ac.uk/QuickGO/GTerm?id=GO:2001237	[]
4	4	epithelial cell proliferation	GO:0050673	0.227	0.378	0.05	-0.12	6.85695	-11.527	CAV2|0.417;MCC|2.125	2	258	76	21829	http://www.ebi.ac.uk/QuickGO/GTerm?id=GO:0050673	[]
5	5	female gonad development	GO:0008585	0.228	0.379	0	-0.14	6.85695	-11.527	ADAMTS1|1.877	1	74	76	21829	http://www.ebi.ac.uk/QuickGO/GTerm?id=GO:0008585	[]
6	6	polyol metabolic process	GO:0019751	0.228	0.379	0	-0.14	6.85695	-11.527	SLC5A3|1.572	1	74	76	21829	http://www.ebi.ac.uk/QuickGO/GTerm?id=GO:0019751	[]
5	5	Golgi organization	GO:0007030	0.228	0.379	0	-0.14	6.85695	-11.527	SPTBN5|28.402	1	74	76	21829	http://www.ebi.ac.uk/QuickGO/GTerm?id=GO:0007030	[]
6	5,6	cellular response to starvation	GO:0009267	0.228	0.379	-0.37	-0.31	6.85695	-11.527	KIAA1324|5.521;PDK4|0.421	2	259	76	21829	http://www.ebi.ac.uk/QuickGO/GTerm?id=GO:0009267	[]
5	5	anatomical structure homeostasis	GO:0060249	0.23	0.382	-0.71	-0.47	6.85695	-11.527	PROM1|0.467;PDK4|0.421	2	261	76	21829	http://www.ebi.ac.uk/QuickGO/GTerm?id=GO:0060249	[]
4	4	digestion	GO:0007586	0.231	0.382	0	-0.14	6.85695	-11.527	CCK1R|5.905	1	75	76	21829	http://www.ebi.ac.uk/QuickGO/GTerm?id=GO:0007586	[]
9	7,9	mechanoreceptor differentiation	GO:0042490	0.231	0.382	0	-0.14	6.85695	-11.527	JAG1|1.703	1	75	76	21829	http://www.ebi.ac.uk/QuickGO/GTerm?id=GO:0042490	[]
5	5	phenol-containing compound metabolic process	GO:0018958	0.231	0.382	0	-0.14	6.85695	-11.527	MAOA|0.614	1	75	76	21829	http://www.ebi.ac.uk/QuickGO/GTerm?id=GO:0018958	[]
7	7	tricarboxylic acid metabolic process	GO:0072350	0.233	0.384	0	-0.14	6.85695	-11.527	CS|1.611	1	76	76	21829	http://www.ebi.ac.uk/QuickGO/GTerm?id=GO:0072350	[]
5	4,5	chromosome separation	GO:0051304	0.233	0.384	0	-0.14	6.85695	-11.527	TOP2A|0.53	1	76	76	21829	http://www.ebi.ac.uk/QuickGO/GTerm?id=GO:0051304	[]
5	5	female gamete generation	GO:0007292	0.233	0.384	0	-0.14	6.85695	-11.527	ADAMTS1|1.877	1	76	76	21829	http://www.ebi.ac.uk/QuickGO/GTerm?id=GO:0007292	[]
6	5,6	cellular polysaccharide metabolic process	GO:0044264	0.233	0.384	0	-0.14	6.85695	-11.527	IRS2|1.866	1	76	76	21829	http://www.ebi.ac.uk/QuickGO/GTerm?id=GO:0044264	[]
9	9	regulation of pH	GO:0006885	0.233	0.384	0	-0.14	6.85695	-11.527	PDK4|0.421	1	76	76	21829	http://www.ebi.ac.uk/QuickGO/GTerm?id=GO:0006885	[]
6	5,6	development of primary female sexual characteristics	GO:0046545	0.233	0.384	0	-0.14	6.85695	-11.527	ADAMTS1|1.877	1	76	76	21829	http://www.ebi.ac.uk/QuickGO/GTerm?id=GO:0046545	[]
6	6	cation transport	GO:0006812	0.235	0.386	-1.98	-1.06	6.85695	-11.527	SLC25A25|0.627;ATP1A1|1.604;SIK1|1.694;SGK2|0.559;COX7C|0.658;TRPA1|0.123	6	1192	76	21829	http://www.ebi.ac.uk/QuickGO/GTerm?id=GO:0006812	[]
4	4	response to starvation	GO:0042594	0.236	0.387	-0.37	-0.31	6.85695	-11.527	KIAA1324|5.521;PDK4|0.421	2	265	76	21829	http://www.ebi.ac.uk/QuickGO/GTerm?id=GO:0042594	[]
5	5	synaptic vesicle cycle	GO:0099504	0.236	0.387	0	-0.14	6.85695	-11.527	CDH2|1.906	1	77	76	21829	http://www.ebi.ac.uk/QuickGO/GTerm?id=GO:0099504	[]
9	7,8,9	positive regulation of proteasomal protein catabolic process	GO:1901800	0.236	0.387	0	-0.14	6.85695	-11.527	RNF144A|2.045	1	77	76	21829	http://www.ebi.ac.uk/QuickGO/GTerm?id=GO:1901800	[]
5	5	cellular response to inorganic substance	GO:0071241	0.236	0.387	0	-0.14	6.85695	-11.527	FOS|3.316	1	77	76	21829	http://www.ebi.ac.uk/QuickGO/GTerm?id=GO:0071241	[]
6	4,5,6	transmembrane transport	GO:0055085	0.236	0.387	-2.54	-1.32	6.85695	-11.527	SLC25A25|0.627;SLC2A2|0.635;ATP1A1|1.604;IRS2|1.866;SLC6A14|0.423;COX7C|0.658;SLC5A3|1.572;TRPA1|0.123	8	1695	76	21829	http://www.ebi.ac.uk/QuickGO/GTerm?id=GO:0055085	[]
3	3	single-organism localization	GO:1902578	0.238	0.39	-0.95	-0.58	6.85695	-11.527	SIDT1|5.384;CDH2|1.906;SLC25A25|0.627;ACSL1|0.614;SLC2A2|0.635;ATP1A1|1.604;SIK1|1.694;CCK1R|5.905;OSCP1|0.14;SGK2|0.559;IRS2|1.866;SLC6A14|0.423;COX7C|0.658;SLC5A3|1.572;TRPA1|0.123;SPTBN5|28.402	16	3793	76	21829	http://www.ebi.ac.uk/QuickGO/GTerm?id=GO:1902578	[]
6	6	monosaccharide biosynthetic process	GO:0046364	0.239	0.39	0	-0.14	6.85695	-11.527	SIK1|1.694	1	78	76	21829	http://www.ebi.ac.uk/QuickGO/GTerm?id=GO:0046364	[]
7	7	amino acid transmembrane transport	GO:0003333	0.239	0.39	0	-0.14	6.85695	-11.527	SLC6A14|0.423	1	78	76	21829	http://www.ebi.ac.uk/QuickGO/GTerm?id=GO:0003333	[]
5	5	mitochondrion organization	GO:0007005	0.239	0.39	-1.48	-0.83	6.85695	-11.527	CAV2|0.417;PPARGC1A|0.564;OSCP1|0.14	3	485	76	21829	http://www.ebi.ac.uk/QuickGO/GTerm?id=GO:0007005	[]
FALSE	obselete	obsolete cell-type specific apoptotic process	GO:0097285	0.239	0.391	-0.02	-0.15	6.85695	-11.527	PPARGC1A|0.564;IRS2|1.866	2	268	76	21829	http://www.ebi.ac.uk/QuickGO/GTerm?id=GO:0097285	[]
6	5,6	lipid transport	GO:0006869	0.241	0.392	-0.06	-0.17	6.85695	-11.527	ACSL1|0.614;IRS2|1.866	2	269	76	21829	http://www.ebi.ac.uk/QuickGO/GTerm?id=GO:0006869	[]
6	6	myeloid cell differentiation	GO:0030099	0.241	0.392	0.75	0.21	6.85695	-11.527	FOS|3.316;JAG1|1.703	2	269	76	21829	http://www.ebi.ac.uk/QuickGO/GTerm?id=GO:0030099	[]
5	5	mitotic spindle organization	GO:0007052	0.241	0.392	0	-0.14	6.85695	-11.527	MZT1|0.461	1	79	76	21829	http://www.ebi.ac.uk/QuickGO/GTerm?id=GO:0007052	[]
5	5	spindle assembly	GO:0051225	0.241	0.392	0	-0.14	6.85695	-11.527	MZT1|0.461	1	79	76	21829	http://www.ebi.ac.uk/QuickGO/GTerm?id=GO:0051225	[]
5	5	positive regulation of cell migration	GO:0030335	0.242	0.393	0.62	0.15	6.85695	-11.527	CYR61|2.231;IRS2|1.866	2	270	76	21829	http://www.ebi.ac.uk/QuickGO/GTerm?id=GO:0030335	[]
8	6,7,8	cellular glucose homeostasis	GO:0001678	0.244	0.393	0	-0.14	6.85695	-11.527	HKDC1|2.366	1	80	76	21829	http://www.ebi.ac.uk/QuickGO/GTerm?id=GO:0001678	[]
6	6	endothelium development	GO:0003158	0.244	0.393	0	-0.14	6.85695	-11.527	JAG1|1.703	1	80	76	21829	http://www.ebi.ac.uk/QuickGO/GTerm?id=GO:0003158	[]
8	6,8	alpha-amino acid catabolic process	GO:1901606	0.244	0.393	0	-0.14	6.85695	-11.527	PIPOX|1.809	1	80	76	21829	http://www.ebi.ac.uk/QuickGO/GTerm?id=GO:1901606	[]
5	5	polysaccharide metabolic process	GO:0005976	0.244	0.393	0	-0.14	6.85695	-11.527	IRS2|1.866	1	80	76	21829	http://www.ebi.ac.uk/QuickGO/GTerm?id=GO:0005976	[]
7	5,7	regulation of fat cell differentiation	GO:0045598	0.244	0.393	0	-0.14	6.85695	-11.527	JAG1|1.703	1	80	76	21829	http://www.ebi.ac.uk/QuickGO/GTerm?id=GO:0045598	[]
6	6	regulation of myeloid leukocyte differentiation	GO:0002761	0.244	0.393	0	-0.14	6.85695	-11.527	FOS|3.316	1	80	76	21829	http://www.ebi.ac.uk/QuickGO/GTerm?id=GO:0002761	[]
8	7,8	positive regulation of cysteine-type endopeptidase activity involved in apoptotic process	GO:0043280	0.244	0.393	0	-0.14	6.85695	-11.527	CYR61|2.231	1	80	76	21829	http://www.ebi.ac.uk/QuickGO/GTerm?id=GO:0043280	[]
6	6	cardiac muscle cell differentiation	GO:0055007	0.244	0.393	0	-0.14	6.85695	-11.527	SIK1|1.694	1	80	76	21829	http://www.ebi.ac.uk/QuickGO/GTerm?id=GO:0055007	[]
5	5	regulation of ion transport	GO:0043269	0.244	0.393	0.25	-0.02	6.85695	-11.527	SIK1|1.694;SGK2|0.559;IRS2|1.866	3	491	76	21829	http://www.ebi.ac.uk/QuickGO/GTerm?id=GO:0043269	[]
10	8,9,10	calcium ion transmembrane transport	GO:0070588	0.245	0.394	-1.11	-0.66	6.85695	-11.527	SLC25A25|0.627;TRPA1|0.123	2	272	76	21829	http://www.ebi.ac.uk/QuickGO/GTerm?id=GO:0070588	[]
6	5,6	positive regulation of cellular biosynthetic process	GO:0031328	0.245	0.395	2.34	0.94	6.85695	-11.527	CYR61|2.231;EGR1|2.376;JUN|2.208;PPARGC1A|0.564;FOS|3.316;IRS2|1.866;JAG1|1.703	7	1461	76	21829	http://www.ebi.ac.uk/QuickGO/GTerm?id=GO:0031328	[]
7	4,6,7	positive regulation of protein transport	GO:0051222	0.246	0.395	0.58	0.13	6.85695	-11.527	OSCP1|0.14;IRS2|1.866	2	273	76	21829	http://www.ebi.ac.uk/QuickGO/GTerm?id=GO:0051222	[]
5	5	response to lipid	GO:0033993	0.246	0.395	-0.18	-0.23	6.85695	-11.527	RARA|1.526;BCO1|0.596;PDK4|0.421	3	493	76	21829	http://www.ebi.ac.uk/QuickGO/GTerm?id=GO:0033993	[]
5	5	endothelial cell proliferation	GO:0001935	0.246	0.395	0	-0.14	6.85695	-11.527	CAV2|0.417	1	81	76	21829	http://www.ebi.ac.uk/QuickGO/GTerm?id=GO:0001935	[]
5	5	cellular response to nutrient levels	GO:0031669	0.247	0.396	-0.37	-0.31	6.85695	-11.527	KIAA1324|5.521;PDK4|0.421	2	274	76	21829	http://www.ebi.ac.uk/QuickGO/GTerm?id=GO:0031669	[]
6	6	negative regulation of proteolysis	GO:0045861	0.248	0.398	-0.66	-0.45	6.85695	-11.527	CHAC1|0.521;WFDC1|0.417	2	275	76	21829	http://www.ebi.ac.uk/QuickGO/GTerm?id=GO:0045861	[]
5	4,5	cell development	GO:0048468	0.249	0.398	2.9	1.2	6.85695	-11.527	LRFN5|1.736;CAV2|0.417;CDH2|1.906;GFRA3|0.646;CYR61|2.231;CCK1R|5.905;LPAR3|2.868;JAG1|1.703	8	1721	76	21829	http://www.ebi.ac.uk/QuickGO/GTerm?id=GO:0048468	[]
5	5	bone mineralization	GO:0030282	0.249	0.398	0	-0.14	6.85695	-11.527	KL|3.059	1	82	76	21829	http://www.ebi.ac.uk/QuickGO/GTerm?id=GO:0030282	[]
5	4,5	positive regulation of cell motility	GO:2000147	0.25	0.399	0.62	0.15	6.85695	-11.527	CYR61|2.231;IRS2|1.866	2	276	76	21829	http://www.ebi.ac.uk/QuickGO/GTerm?id=GO:2000147	[]
4	4	carbohydrate derivative metabolic process	GO:1901135	0.25	0.399	-1.69	-0.92	6.85695	-11.527	SLC25A25|0.627;PANK1|0.639;PPARGC1A|0.564;HKDC1|2.366;KL|3.059;COX7C|0.658	6	1219	76	21829	http://www.ebi.ac.uk/QuickGO/GTerm?id=GO:1901135	[]
5	5	chemical homeostasis	GO:0048878	0.252	0.399	-0.23	-0.25	6.85695	-11.527	HKDC1|2.366;SGK2|0.559;KL|3.059;PDK4|0.421	4	733	76	21829	http://www.ebi.ac.uk/QuickGO/GTerm?id=GO:0048878	[]
8	6,7,8	positive regulation of nucleotide biosynthetic process	GO:0030810	0.252	0.399	0	-0.14	6.85695	-11.527	PPARGC1A|0.564	1	83	76	21829	http://www.ebi.ac.uk/QuickGO/GTerm?id=GO:0030810	[]
3	3	cellular detoxification	GO:1990748	0.252	0.399	0	-0.14	6.85695	-11.527	SOD3|0.184	1	83	76	21829	http://www.ebi.ac.uk/QuickGO/GTerm?id=GO:1990748	[]
5	5	regulation of stem cell proliferation	GO:0072091	0.252	0.399	0	-0.14	6.85695	-11.527	IRS2|1.866	1	83	76	21829	http://www.ebi.ac.uk/QuickGO/GTerm?id=GO:0072091	[]
8	6,7,8	fibroblast growth factor receptor signaling pathway	GO:0008543	0.252	0.399	0	-0.14	6.85695	-11.527	KL|3.059	1	83	76	21829	http://www.ebi.ac.uk/QuickGO/GTerm?id=GO:0008543	[]
9	7,8,9	positive regulation of purine nucleotide biosynthetic process	GO:1900373	0.252	0.399	0	-0.14	6.85695	-11.527	PPARGC1A|0.564	1	83	76	21829	http://www.ebi.ac.uk/QuickGO/GTerm?id=GO:1900373	[]
4	4	cellular oxidant detoxification	GO:0098869	0.252	0.399	0	-0.14	6.85695	-11.527	SOD3|0.184	1	83	76	21829	http://www.ebi.ac.uk/QuickGO/GTerm?id=GO:0098869	[]
5	5	vesicle docking	GO:0048278	0.252	0.399	0	-0.14	6.85695	-11.527	CAV2|0.417	1	83	76	21829	http://www.ebi.ac.uk/QuickGO/GTerm?id=GO:0048278	[]
5	5	alpha-amino acid metabolic process	GO:1901605	0.252	0.399	-0.08	-0.18	6.85695	-11.527	CDO1|0.672;PIPOX|1.809	2	278	76	21829	http://www.ebi.ac.uk/QuickGO/GTerm?id=GO:1901605	[]
4	4	regulation of anatomical structure morphogenesis	GO:0022603	0.254	0.401	-0.25	-0.26	6.85695	-11.527	ENPP2|0.6;LPAR3|2.868;CRHR2|2.007;ANKRD6|0.513	4	736	76	21829	http://www.ebi.ac.uk/QuickGO/GTerm?id=GO:0022603	[]
5	4,5	single-organism transport	GO:0044765	0.254	0.401	-3.86	-1.93	6.85695	-11.527	SIDT1|5.384;SLC25A25|0.627;ACSL1|0.614;SLC2A2|0.635;ATP1A1|1.604;SIK1|1.694;CCK1R|5.905;OSCP1|0.14;SGK2|0.559;IRS2|1.866;SLC6A14|0.423;COX7C|0.658;SLC5A3|1.572;TRPA1|0.123;SPTBN5|28.402	15	3572	76	21829	http://www.ebi.ac.uk/QuickGO/GTerm?id=GO:0044765	[]
2	2	detoxification	GO:0098754	0.254	0.401	0	-0.14	6.85695	-11.527	SOD3|0.184	1	84	76	21829	http://www.ebi.ac.uk/QuickGO/GTerm?id=GO:0098754	[]
9	9	positive regulation of cysteine-type endopeptidase activity	GO:2001056	0.254	0.401	0	-0.14	6.85695	-11.527	CYR61|2.231	1	84	76	21829	http://www.ebi.ac.uk/QuickGO/GTerm?id=GO:2001056	[]
10	7,9,10	toll-like receptor signaling pathway	GO:0002224	0.254	0.401	0	-0.14	6.85695	-11.527	JUN|2.208	1	84	76	21829	http://www.ebi.ac.uk/QuickGO/GTerm?id=GO:0002224	[]
4	4	positive regulation of biosynthetic process	GO:0009891	0.255	0.401	2.34	0.94	6.85695	-11.527	CYR61|2.231;EGR1|2.376;JUN|2.208;PPARGC1A|0.564;FOS|3.316;IRS2|1.866;JAG1|1.703	7	1478	76	21829	http://www.ebi.ac.uk/QuickGO/GTerm?id=GO:0009891	[]
4	4	chromosome segregation	GO:0007059	0.256	0.403	-0.58	-0.41	6.85695	-11.527	TOP2A|0.53;SMC2|0.493	2	281	76	21829	http://www.ebi.ac.uk/QuickGO/GTerm?id=GO:0007059	[]
8	7,8	positive regulation of nucleic acid-templated transcription	GO:1903508	0.257	0.403	2.07	0.82	6.85695	-11.527	CYR61|2.231;EGR1|2.376;JUN|2.208;PPARGC1A|0.564;FOS|3.316;JAG1|1.703	6	1230	76	21829	http://www.ebi.ac.uk/QuickGO/GTerm?id=GO:1903508	[]
9	6,7,8,9	positive regulation of transcription, DNA-templated	GO:0045893	0.257	0.403	2.07	0.82	6.85695	-11.527	CYR61|2.231;EGR1|2.376;JUN|2.208;PPARGC1A|0.564;FOS|3.316;JAG1|1.703	6	1230	76	21829	http://www.ebi.ac.uk/QuickGO/GTerm?id=GO:0045893	[]
9	8,9	purine ribonucleoside triphosphate biosynthetic process	GO:0009206	0.257	0.403	0	-0.14	6.85695	-11.527	PPARGC1A|0.564	1	85	76	21829	http://www.ebi.ac.uk/QuickGO/GTerm?id=GO:0009206	[]
5	5	microtubule polymerization or depolymerization	GO:0031109	0.257	0.403	0	-0.14	6.85695	-11.527	MZT1|0.461	1	85	76	21829	http://www.ebi.ac.uk/QuickGO/GTerm?id=GO:0031109	[]
7	6,7	positive regulation of RNA biosynthetic process	GO:1902680	0.257	0.403	2.07	0.82	6.85695	-11.527	CYR61|2.231;EGR1|2.376;JUN|2.208;PPARGC1A|0.564;FOS|3.316;JAG1|1.703	6	1231	76	21829	http://www.ebi.ac.uk/QuickGO/GTerm?id=GO:1902680	[]
2	2	localization	GO:0051179	0.259	0.405	-9.43	-4.52	6.85695	-11.527	SIDT1|5.384;RIC3|0.491;CAV2|0.417;CDH2|1.906;SLC25A25|0.627;ACSL1|0.614;SLC2A2|0.635;GFRA3|0.646;ENPP2|0.6;CYR61|2.231;ATP1A1|1.604;SIK1|1.694;CCK1R|5.905;OSCP1|0.14;SGK2|0.559;IRS2|1.866;SLC6A14|0.423;COX7C|0.658;SLC5A3|1.572;TRPA1|0.123;SPTBN5|28.402;MZT1|0.461;MCC|2.125	23	5765	76	21829	http://www.ebi.ac.uk/QuickGO/GTerm?id=GO:0051179	[]
6	4,5,6	positive regulation of cell-substrate adhesion	GO:0010811	0.26	0.405	0	-0.14	6.85695	-11.527	CYR61|2.231	1	86	76	21829	http://www.ebi.ac.uk/QuickGO/GTerm?id=GO:0010811	[]
7	5,6,7	microtubule cytoskeleton organization involved in mitosis	GO:1902850	0.26	0.405	0	-0.14	6.85695	-11.527	MZT1|0.461	1	86	76	21829	http://www.ebi.ac.uk/QuickGO/GTerm?id=GO:1902850	[]
5	5	protein complex localization	GO:0031503	0.26	0.405	0	-0.14	6.85695	-11.527	MZT1|0.461	1	86	76	21829	http://www.ebi.ac.uk/QuickGO/GTerm?id=GO:0031503	[]
4	4	positive regulation of cellular component movement	GO:0051272	0.26	0.405	0.62	0.15	6.85695	-11.527	CYR61|2.231;IRS2|1.866	2	284	76	21829	http://www.ebi.ac.uk/QuickGO/GTerm?id=GO:0051272	[]
8	7,8	purine nucleoside triphosphate biosynthetic process	GO:0009145	0.262	0.407	0	-0.14	6.85695	-11.527	PPARGC1A|0.564	1	87	76	21829	http://www.ebi.ac.uk/QuickGO/GTerm?id=GO:0009145	[]
7	6,7	aerobic respiration	GO:0009060	0.262	0.407	0	-0.14	6.85695	-11.527	CS|1.611	1	87	76	21829	http://www.ebi.ac.uk/QuickGO/GTerm?id=GO:0009060	[]
8	7,8	positive regulation of proteolysis involved in cellular protein catabolic process	GO:1903052	0.262	0.407	0	-0.14	6.85695	-11.527	RNF144A|2.045	1	87	76	21829	http://www.ebi.ac.uk/QuickGO/GTerm?id=GO:1903052	[]
5	5	cellular amine metabolic process	GO:0044106	0.262	0.407	0	-0.14	6.85695	-11.527	ENPP2|0.6	1	87	76	21829	http://www.ebi.ac.uk/QuickGO/GTerm?id=GO:0044106	[]
7	5,6,7	positive regulation of transmembrane receptor protein serine/threonine kinase signaling pathway	GO:0090100	0.262	0.407	0	-0.14	6.85695	-11.527	CYR61|2.231	1	87	76	21829	http://www.ebi.ac.uk/QuickGO/GTerm?id=GO:0090100	[]
5	4,5	negative regulation of defense response	GO:0031348	0.262	0.407	0	-0.14	6.85695	-11.527	WFDC1|0.417	1	87	76	21829	http://www.ebi.ac.uk/QuickGO/GTerm?id=GO:0031348	[]
3	3	positive regulation of locomotion	GO:0040017	0.263	0.407	0.62	0.15	6.85695	-11.527	CYR61|2.231;IRS2|1.866	2	286	76	21829	http://www.ebi.ac.uk/QuickGO/GTerm?id=GO:0040017	[]
9	8,9	purine ribonucleotide biosynthetic process	GO:0009152	0.264	0.409	-0.44	-0.35	6.85695	-11.527	PANK1|0.639;PPARGC1A|0.564	2	287	76	21829	http://www.ebi.ac.uk/QuickGO/GTerm?id=GO:0009152	[]
8	6,7,8	regulation of B cell activation	GO:0050864	0.265	0.409	0	-0.14	6.85695	-11.527	IRS2|1.866	1	88	76	21829	http://www.ebi.ac.uk/QuickGO/GTerm?id=GO:0050864	[]
6	6	ion homeostasis	GO:0050801	0.265	0.409	-0.49	-0.37	6.85695	-11.527	SGK2|0.559;KL|3.059;PDK4|0.421	3	513	76	21829	http://www.ebi.ac.uk/QuickGO/GTerm?id=GO:0050801	[]
8	6,8	regulation of neurogenesis	GO:0050767	0.265	0.409	0.97	0.31	6.85695	-11.527	CDH2|1.906;LPAR3|2.868;JAG1|1.703	3	513	76	21829	http://www.ebi.ac.uk/QuickGO/GTerm?id=GO:0050767	[]
5	5	response to organic cyclic compound	GO:0014070	0.266	0.41	0.91	0.28	6.85695	-11.527	JUN|2.208;RARA|1.526;TRPA1|0.123	3	514	76	21829	http://www.ebi.ac.uk/QuickGO/GTerm?id=GO:0014070	[]
7	5,7	cellular amino acid catabolic process	GO:0009063	0.267	0.411	0	-0.14	6.85695	-11.527	PIPOX|1.809	1	89	76	21829	http://www.ebi.ac.uk/QuickGO/GTerm?id=GO:0009063	[]
3	3	pigmentation	GO:0043473	0.267	0.411	0	-0.14	6.85695	-11.527	ADAMTS9|0.583	1	89	76	21829	http://www.ebi.ac.uk/QuickGO/GTerm?id=GO:0043473	[]
9	8,9	positive regulation of JNK cascade	GO:0046330	0.267	0.411	0	-0.14	6.85695	-11.527	ANKRD6|0.513	1	89	76	21829	http://www.ebi.ac.uk/QuickGO/GTerm?id=GO:0046330	[]
6	5,6	organophosphate ester transport	GO:0015748	0.267	0.411	0	-0.14	6.85695	-11.527	SLC25A25|0.627	1	89	76	21829	http://www.ebi.ac.uk/QuickGO/GTerm?id=GO:0015748	[]
4	4	forebrain development	GO:0030900	0.268	0.412	1.05	0.35	6.85695	-11.527	CDH2|1.906;CCK1R|5.905	2	290	76	21829	http://www.ebi.ac.uk/QuickGO/GTerm?id=GO:0030900	[]
9	6,8,9	glycolytic process	GO:0006096	0.27	0.414	0	-0.14	6.85695	-11.527	HKDC1|2.366	1	90	76	21829	http://www.ebi.ac.uk/QuickGO/GTerm?id=GO:0006096	[]
7	5,6,7	bone morphogenesis	GO:0060349	0.27	0.414	0	-0.14	6.85695	-11.527	EVC|0.468	1	90	76	21829	http://www.ebi.ac.uk/QuickGO/GTerm?id=GO:0060349	[]
5	3,4,5	regulation of homeostatic process	GO:0032844	0.27	0.414	-0.62	-0.43	6.85695	-11.527	PPARGC1A|0.564;PDK4|0.421	2	292	76	21829	http://www.ebi.ac.uk/QuickGO/GTerm?id=GO:0032844	[]
6	5,6	biomineral tissue development	GO:0031214	0.272	0.417	0	-0.14	6.85695	-11.527	KL|3.059	1	91	76	21829	http://www.ebi.ac.uk/QuickGO/GTerm?id=GO:0031214	[]
10	5,9,10	ATP generation from ADP	GO:0006757	0.272	0.417	0	-0.14	6.85695	-11.527	HKDC1|2.366	1	91	76	21829	http://www.ebi.ac.uk/QuickGO/GTerm?id=GO:0006757	[]
7	7	regulation of endopeptidase activity	GO:0052548	0.273	0.417	0.03	-0.13	6.85695	-11.527	CYR61|2.231;WFDC1|0.417	2	294	76	21829	http://www.ebi.ac.uk/QuickGO/GTerm?id=GO:0052548	[]
5	5	wound healing	GO:0042060	0.274	0.419	0.03	-0.13	6.85695	-11.527	CYR61|2.231;WFDC1|0.417	2	295	76	21829	http://www.ebi.ac.uk/QuickGO/GTerm?id=GO:0042060	[]
8	8	positive regulation of endopeptidase activity	GO:0010950	0.275	0.419	0	-0.14	6.85695	-11.527	CYR61|2.231	1	92	76	21829	http://www.ebi.ac.uk/QuickGO/GTerm?id=GO:0010950	[]
7	6,7	positive regulation of lymphocyte proliferation	GO:0050671	0.275	0.419	0	-0.14	6.85695	-11.527	IRS2|1.866	1	92	76	21829	http://www.ebi.ac.uk/QuickGO/GTerm?id=GO:0050671	[]
5	5	cellular response to fibroblast growth factor stimulus	GO:0044344	0.275	0.419	0	-0.14	6.85695	-11.527	KL|3.059	1	92	76	21829	http://www.ebi.ac.uk/QuickGO/GTerm?id=GO:0044344	[]
4	4	cerebral cortex development	GO:0021987	0.275	0.419	0	-0.14	6.85695	-11.527	CDH2|1.906	1	92	76	21829	http://www.ebi.ac.uk/QuickGO/GTerm?id=GO:0021987	[]
7	7	purine nucleotide biosynthetic process	GO:0006164	0.277	0.42	-0.44	-0.35	6.85695	-11.527	PANK1|0.639;PPARGC1A|0.564	2	297	76	21829	http://www.ebi.ac.uk/QuickGO/GTerm?id=GO:0006164	[]
4	4	lipid localization	GO:0010876	0.277	0.42	-0.06	-0.17	6.85695	-11.527	ACSL1|0.614;IRS2|1.866	2	297	76	21829	http://www.ebi.ac.uk/QuickGO/GTerm?id=GO:0010876	[]
7	6,7	positive regulation of nucleotide metabolic process	GO:0045981	0.278	0.42	0	-0.14	6.85695	-11.527	PPARGC1A|0.564	1	93	76	21829	http://www.ebi.ac.uk/QuickGO/GTerm?id=GO:0045981	[]
5	5	female sex differentiation	GO:0046660	0.278	0.42	0	-0.14	6.85695	-11.527	ADAMTS1|1.877	1	93	76	21829	http://www.ebi.ac.uk/QuickGO/GTerm?id=GO:0046660	[]
7	7	positive regulation of purine nucleotide metabolic process	GO:1900544	0.278	0.42	0	-0.14	6.85695	-11.527	PPARGC1A|0.564	1	93	76	21829	http://www.ebi.ac.uk/QuickGO/GTerm?id=GO:1900544	[]
4	4	response to fibroblast growth factor	GO:0071774	0.278	0.42	0	-0.14	6.85695	-11.527	KL|3.059	1	93	76	21829	http://www.ebi.ac.uk/QuickGO/GTerm?id=GO:0071774	[]
5	5	amine metabolic process	GO:0009308	0.278	0.42	0	-0.14	6.85695	-11.527	ENPP2|0.6	1	93	76	21829	http://www.ebi.ac.uk/QuickGO/GTerm?id=GO:0009308	[]
6	6	positive regulation of mononuclear cell proliferation	GO:0032946	0.278	0.42	0	-0.14	6.85695	-11.527	IRS2|1.866	1	93	76	21829	http://www.ebi.ac.uk/QuickGO/GTerm?id=GO:0032946	[]
3	3	regulation of immune system process	GO:0002682	0.278	0.42	1.37	0.49	6.85695	-11.527	JUN|2.208;FOS|3.316;IRS2|1.866;JAG1|1.703	4	767	76	21829	http://www.ebi.ac.uk/QuickGO/GTerm?id=GO:0002682	[]
4	4	tube development	GO:0035295	0.278	0.42	0.33	0.01	6.85695	-11.527	CDH2|1.906;PROM1|0.467;JAG1|1.703	3	527	76	21829	http://www.ebi.ac.uk/QuickGO/GTerm?id=GO:0035295	[]
7	5,6,7	positive regulation of RNA metabolic process	GO:0051254	0.28	0.422	2.07	0.82	6.85695	-11.527	CYR61|2.231;EGR1|2.376;JUN|2.208;PPARGC1A|0.564;FOS|3.316;JAG1|1.703	6	1269	76	21829	http://www.ebi.ac.uk/QuickGO/GTerm?id=GO:0051254	[]
3	3	negative regulation of sequence-specific DNA binding transcription factor activity	GO:0043433	0.28	0.422	0	-0.14	6.85695	-11.527	SIK1|1.694	1	94	76	21829	http://www.ebi.ac.uk/QuickGO/GTerm?id=GO:0043433	[]
11	6,8,9,10,11	regulation of insulin secretion	GO:0050796	0.28	0.422	0	-0.14	6.85695	-11.527	IRS2|1.866	1	94	76	21829	http://www.ebi.ac.uk/QuickGO/GTerm?id=GO:0050796	[]
4	3,4	regulation of metabolic process	GO:0019222	0.281	0.423	8.05	3.59	6.85695	-11.527	CAV2|0.417;CDH2|1.906;ACSL1|0.614;MST1R|1.705;CHAC1|0.521;CYR61|2.231;EGR1|2.376;JUN|2.208;PPARGC1A|0.564;RARA|1.526;FOS|3.316;WFDC1|0.417;SIK1|1.694;KIAA1324|5.521;CHRDL1|0.429;IRS2|1.866;KL|3.059;RNF144A|2.045;LPAR3|2.868;AEBP1|2.049;ANKRD6|0.513;DUSP8|1.567;JAG1|1.703;PDK4|0.421	24	6114	76	21829	http://www.ebi.ac.uk/QuickGO/GTerm?id=GO:0019222	[]
3	3	regulation of biological quality	GO:0065008	0.282	0.424	4.37	1.89	6.85695	-11.527	CDH2|1.906;PROM1|0.467;PPARGC1A|0.564;HKDC1|2.366;CCK1R|5.905;BCO1|0.596;SGK2|0.559;IRS2|1.866;KL|3.059;LPAR3|2.868;CRHR2|2.007;PDK4|0.421	12	2843	76	21829	http://www.ebi.ac.uk/QuickGO/GTerm?id=GO:0065008	[]
8	6,7,8	negative regulation of neuron apoptotic process	GO:0043524	0.283	0.424	0	-0.14	6.85695	-11.527	PPARGC1A|0.564	1	95	76	21829	http://www.ebi.ac.uk/QuickGO/GTerm?id=GO:0043524	[]
6	5,6	ion transmembrane transport	GO:0034220	0.285	0.427	-2.14	-1.14	6.85695	-11.527	SLC25A25|0.627;ATP1A1|1.604;IRS2|1.866;SLC6A14|0.423;COX7C|0.658;TRPA1|0.123	6	1277	76	21829	http://www.ebi.ac.uk/QuickGO/GTerm?id=GO:0034220	[]
7	5,6,7	positive regulation of Wnt signaling pathway	GO:0030177	0.285	0.427	0	-0.14	6.85695	-11.527	ANKRD6|0.513	1	96	76	21829	http://www.ebi.ac.uk/QuickGO/GTerm?id=GO:0030177	[]
3	3	positive regulation of multi-organism process	GO:0043902	0.285	0.427	0	-0.14	6.85695	-11.527	JUN|2.208	1	96	76	21829	http://www.ebi.ac.uk/QuickGO/GTerm?id=GO:0043902	[]
6	5,6	neuropeptide signaling pathway	GO:0007218	0.285	0.427	0	-0.14	6.85695	-11.527	CRCP|0.599	1	96	76	21829	http://www.ebi.ac.uk/QuickGO/GTerm?id=GO:0007218	[]
5	5	regulation of cellular catabolic process	GO:0031329	0.287	0.428	1.32	0.47	6.85695	-11.527	KIAA1324|5.521;IRS2|1.866;RNF144A|2.045	3	536	76	21829	http://www.ebi.ac.uk/QuickGO/GTerm?id=GO:0031329	[]
7	6,7	regulation of protein kinase B signaling	GO:0051896	0.288	0.428	0	-0.14	6.85695	-11.527	MST1R|1.705	1	97	76	21829	http://www.ebi.ac.uk/QuickGO/GTerm?id=GO:0051896	[]
5	5	positive regulation of leukocyte proliferation	GO:0070665	0.288	0.428	0	-0.14	6.85695	-11.527	IRS2|1.866	1	97	76	21829	http://www.ebi.ac.uk/QuickGO/GTerm?id=GO:0070665	[]
4	4	detection of abiotic stimulus	GO:0009582	0.288	0.428	0	-0.14	6.85695	-11.527	TRPA1|0.123	1	97	76	21829	http://www.ebi.ac.uk/QuickGO/GTerm?id=GO:0009582	[]
4	4	detection of external stimulus	GO:0009581	0.288	0.428	0	-0.14	6.85695	-11.527	TRPA1|0.123	1	97	76	21829	http://www.ebi.ac.uk/QuickGO/GTerm?id=GO:0009581	[]
5	5	regulation of synapse organization	GO:0050807	0.288	0.428	0	-0.14	6.85695	-11.527	CDH2|1.906	1	97	76	21829	http://www.ebi.ac.uk/QuickGO/GTerm?id=GO:0050807	[]
7	6,7	anion transmembrane transport	GO:0098656	0.288	0.429	0.1	-0.09	6.85695	-11.527	IRS2|1.866;SLC6A14|0.423	2	306	76	21829	http://www.ebi.ac.uk/QuickGO/GTerm?id=GO:0098656	[]
4	4	membrane docking	GO:0022406	0.29	0.431	0	-0.14	6.85695	-11.527	CAV2|0.417	1	98	76	21829	http://www.ebi.ac.uk/QuickGO/GTerm?id=GO:0022406	[]
7	6,7	positive regulation of cellular protein catabolic process	GO:1903364	0.29	0.431	0	-0.14	6.85695	-11.527	RNF144A|2.045	1	98	76	21829	http://www.ebi.ac.uk/QuickGO/GTerm?id=GO:1903364	[]
6	5,6	positive regulation of leukocyte differentiation	GO:1902107	0.29	0.431	0	-0.14	6.85695	-11.527	FOS|3.316	1	98	76	21829	http://www.ebi.ac.uk/QuickGO/GTerm?id=GO:1902107	[]
4	4	negative regulation of molecular function	GO:0044092	0.29	0.431	1.07	0.36	6.85695	-11.527	WFDC1|0.417;SIK1|1.694;IRS2|1.866;DUSP8|1.567	4	783	76	21829	http://www.ebi.ac.uk/QuickGO/GTerm?id=GO:0044092	[]
8	7,8	positive regulation of stress-activated MAPK cascade	GO:0032874	0.293	0.433	0	-0.14	6.85695	-11.527	ANKRD6|0.513	1	99	76	21829	http://www.ebi.ac.uk/QuickGO/GTerm?id=GO:0032874	[]
6	6	regulation of wound healing	GO:0061041	0.293	0.433	0	-0.14	6.85695	-11.527	WFDC1|0.417	1	99	76	21829	http://www.ebi.ac.uk/QuickGO/GTerm?id=GO:0061041	[]
3	3	establishment of localization	GO:0051234	0.293	0.433	-4.46	-2.21	6.85695	-11.527	SIDT1|5.384;CAV2|0.417;CDH2|1.906;SLC25A25|0.627;ACSL1|0.614;SLC2A2|0.635;ENPP2|0.6;ATP1A1|1.604;SIK1|1.694;CCK1R|5.905;OSCP1|0.14;SGK2|0.559;IRS2|1.866;SLC6A14|0.423;COX7C|0.658;SLC5A3|1.572;TRPA1|0.123;SPTBN5|28.402;MCC|2.125	19	4771	76	21829	http://www.ebi.ac.uk/QuickGO/GTerm?id=GO:0051234	[]
8	7,8	ribonucleotide biosynthetic process	GO:0009260	0.294	0.433	-0.44	-0.35	6.85695	-11.527	PANK1|0.639;PPARGC1A|0.564	2	310	76	21829	http://www.ebi.ac.uk/QuickGO/GTerm?id=GO:0009260	[]
6	6	ribose phosphate biosynthetic process	GO:0046390	0.295	0.433	-0.44	-0.35	6.85695	-11.527	PANK1|0.639;PPARGC1A|0.564	2	311	76	21829	http://www.ebi.ac.uk/QuickGO/GTerm?id=GO:0046390	[]
6	4,5,6	regulation of viral process	GO:0050792	0.295	0.433	0	-0.14	6.85695	-11.527	JUN|2.208	1	100	76	21829	http://www.ebi.ac.uk/QuickGO/GTerm?id=GO:0050792	[]
4	4	regulation of muscle tissue development	GO:1901861	0.295	0.433	0	-0.14	6.85695	-11.527	PPARGC1A|0.564	1	100	76	21829	http://www.ebi.ac.uk/QuickGO/GTerm?id=GO:1901861	[]
6	5,6	RNA transport	GO:0050658	0.295	0.433	0	-0.14	6.85695	-11.527	SIDT1|5.384	1	100	76	21829	http://www.ebi.ac.uk/QuickGO/GTerm?id=GO:0050658	[]
7	6,7	positive regulation of stress-activated protein kinase signaling cascade	GO:0070304	0.295	0.433	0	-0.14	6.85695	-11.527	ANKRD6|0.513	1	100	76	21829	http://www.ebi.ac.uk/QuickGO/GTerm?id=GO:0070304	[]
7	7	nucleic acid transport	GO:0050657	0.295	0.433	0	-0.14	6.85695	-11.527	SIDT1|5.384	1	100	76	21829	http://www.ebi.ac.uk/QuickGO/GTerm?id=GO:0050657	[]
9	8,9	ADP metabolic process	GO:0046031	0.295	0.433	0	-0.14	6.85695	-11.527	HKDC1|2.366	1	100	76	21829	http://www.ebi.ac.uk/QuickGO/GTerm?id=GO:0046031	[]
5	5	cellular response to acid chemical	GO:0071229	0.295	0.433	0	-0.14	6.85695	-11.527	PDK4|0.421	1	100	76	21829	http://www.ebi.ac.uk/QuickGO/GTerm?id=GO:0071229	[]
5	4,5	G-protein coupled receptor signaling pathway	GO:0007186	0.296	0.434	0.6	0.14	6.85695	-11.527	CAV2|0.417;CRCP|0.599;CCK1R|5.905;LPAR3|2.868;CRHR2|2.007	5	1040	76	21829	http://www.ebi.ac.uk/QuickGO/GTerm?id=GO:0007186	[]
8	7,8	inorganic cation transmembrane transport	GO:0098662	0.296	0.434	-1.5	-0.84	6.85695	-11.527	SLC25A25|0.627;ATP1A1|1.604;COX7C|0.658;TRPA1|0.123	4	790	76	21829	http://www.ebi.ac.uk/QuickGO/GTerm?id=GO:0098662	[]
6	5,6	negative regulation of cell-cell adhesion	GO:0022408	0.297	0.435	0	-0.14	6.85695	-11.527	CDH2|1.906	1	101	76	21829	http://www.ebi.ac.uk/QuickGO/GTerm?id=GO:0022408	[]
8	7,8	ribonucleoside triphosphate biosynthetic process	GO:0009201	0.297	0.435	0	-0.14	6.85695	-11.527	PPARGC1A|0.564	1	101	76	21829	http://www.ebi.ac.uk/QuickGO/GTerm?id=GO:0009201	[]
6	6	glycerophospholipid biosynthetic process	GO:0046474	0.297	0.435	0	-0.14	6.85695	-11.527	AGPAT2|1.693	1	101	76	21829	http://www.ebi.ac.uk/QuickGO/GTerm?id=GO:0046474	[]
5	5	extracellular matrix organization	GO:0030198	0.299	0.437	-0.35	-0.3	6.85695	-11.527	FAT1|0.605;CYR61|2.231;MZT1|0.461	3	549	76	21829	http://www.ebi.ac.uk/QuickGO/GTerm?id=GO:0030198	[]
5	4,5	establishment of RNA localization	GO:0051236	0.3	0.437	0	-0.14	6.85695	-11.527	SIDT1|5.384	1	102	76	21829	http://www.ebi.ac.uk/QuickGO/GTerm?id=GO:0051236	[]
4	4	aging	GO:0007568	0.3	0.437	0	-0.14	6.85695	-11.527	KL|3.059	1	102	76	21829	http://www.ebi.ac.uk/QuickGO/GTerm?id=GO:0007568	[]
4	4	extracellular structure organization	GO:0043062	0.3	0.437	-0.35	-0.3	6.85695	-11.527	FAT1|0.605;CYR61|2.231;MZT1|0.461	3	550	76	21829	http://www.ebi.ac.uk/QuickGO/GTerm?id=GO:0043062	[]
7	5,6,7	cytokine-mediated signaling pathway	GO:0019221	0.3	0.437	-0.16	-0.22	6.85695	-11.527	ACSL1|0.614;EGR1|2.376	2	315	76	21829	http://www.ebi.ac.uk/QuickGO/GTerm?id=GO:0019221	[]
6	6	regulation of peptidase activity	GO:0052547	0.301	0.438	0.03	-0.13	6.85695	-11.527	CYR61|2.231;WFDC1|0.417	2	316	76	21829	http://www.ebi.ac.uk/QuickGO/GTerm?id=GO:0052547	[]
7	6,7	protein oligomerization	GO:0051259	0.301	0.438	-1.07	-0.64	6.85695	-11.527	CAV2|0.417;SPTBN5|28.402	2	316	76	21829	http://www.ebi.ac.uk/QuickGO/GTerm?id=GO:0051259	[]
9	6,8,9	pattern recognition receptor signaling pathway	GO:0002221	0.302	0.44	0	-0.14	6.85695	-11.527	JUN|2.208	1	103	76	21829	http://www.ebi.ac.uk/QuickGO/GTerm?id=GO:0002221	[]
6	6	purine-containing compound biosynthetic process	GO:0072522	0.303	0.44	-0.44	-0.35	6.85695	-11.527	PANK1|0.639;PPARGC1A|0.564	2	317	76	21829	http://www.ebi.ac.uk/QuickGO/GTerm?id=GO:0072522	[]
3	3	regulation of cellular process	GO:0050794	0.303	0.44	6.94	3.08	6.85695	-11.527	NIM1K|1.617;CAV2|0.417;ADAMTS9|0.583;CDH2|1.906;PROM1|0.467;CRCP|0.599;ACSL1|0.614;MST1R|1.705;CHAC1|0.521;ENPP2|0.6;EVC|0.468;CYR61|2.231;EGR1|2.376;JUN|2.208;PPARGC1A|0.564;TOP2A|0.53;RARA|1.526;FOS|3.316;IGFBP1|0.446;WFDC1|0.417;SIK1|1.694;CCK1R|5.905;KIAA1324|5.521;OSCP1|0.14;CHRDL1|0.429;SGK2|0.559;IRS2|1.866;KL|3.059;RNF144A|2.045;LPAR3|2.868;CRHR2|2.007;AEBP1|2.049;TRPA1|0.123;ANKRD6|0.513…	39	10416	76	21829	http://www.ebi.ac.uk/QuickGO/GTerm?id=GO:0050794	[]
8	5,7,8	innate immune response-activating signal transduction	GO:0002758	0.305	0.441	0	-0.14	6.85695	-11.527	JUN|2.208	1	104	76	21829	http://www.ebi.ac.uk/QuickGO/GTerm?id=GO:0002758	[]
4	4	response to temperature stimulus	GO:0009266	0.305	0.441	0	-0.14	6.85695	-11.527	TRPA1|0.123	1	104	76	21829	http://www.ebi.ac.uk/QuickGO/GTerm?id=GO:0009266	[]
7	6,7	protein targeting to mitochondrion	GO:0006626	0.305	0.441	0	-0.14	6.85695	-11.527	OSCP1|0.14	1	104	76	21829	http://www.ebi.ac.uk/QuickGO/GTerm?id=GO:0006626	[]
3	2,3	regulation of biological process	GO:0050789	0.305	0.442	14.5	6.58	6.85695	-11.527	NIM1K|1.617;CAV2|0.417;ADAMTS9|0.583;CDH2|1.906;PROM1|0.467;CRCP|0.599;ACSL1|0.614;MST1R|1.705;CHAC1|0.521;ENPP2|0.6;EVC|0.468;CYR61|2.231;EGR1|2.376;JUN|2.208;PPARGC1A|0.564;TOP2A|0.53;RARA|1.526;FOS|3.316;IGFBP1|0.446;WFDC1|0.417;SIK1|1.694;CCK1R|5.905;KIAA1324|5.521;OSCP1|0.14;CHRDL1|0.429;SGK2|0.559;IRS2|1.866;KL|3.059;AGPAT2|1.693;RNF144A|2.045;LPAR3|2.868;CRHR2|2.007;SLC5A3|1.572;AEBP1|2.04…	41	10995	76	21829	http://www.ebi.ac.uk/QuickGO/GTerm?id=GO:0050789	[]
5	5	signal release	GO:0023061	0.307	0.443	1.04	0.34	6.85695	-11.527	CCK1R|5.905;IRS2|1.866	2	320	76	21829	http://www.ebi.ac.uk/QuickGO/GTerm?id=GO:0023061	[]
8	8	purine ribonucleoside diphosphate metabolic process	GO:0009179	0.307	0.443	0	-0.14	6.85695	-11.527	HKDC1|2.366	1	105	76	21829	http://www.ebi.ac.uk/QuickGO/GTerm?id=GO:0009179	[]
5	5	cellular response to radiation	GO:0071478	0.307	0.443	0	-0.14	6.85695	-11.527	EGR1|2.376	1	105	76	21829	http://www.ebi.ac.uk/QuickGO/GTerm?id=GO:0071478	[]
7	7	purine nucleoside diphosphate metabolic process	GO:0009135	0.307	0.443	0	-0.14	6.85695	-11.527	HKDC1|2.366	1	105	76	21829	http://www.ebi.ac.uk/QuickGO/GTerm?id=GO:0009135	[]
9	8,9	purine ribonucleoside monophosphate biosynthetic process	GO:0009168	0.307	0.443	0	-0.14	6.85695	-11.527	PPARGC1A|0.564	1	105	76	21829	http://www.ebi.ac.uk/QuickGO/GTerm?id=GO:0009168	[]
5	4,5	positive regulation of cell proliferation	GO:0008284	0.308	0.443	0.38	0.03	6.85695	-11.527	CAV2|0.417;CYR61|2.231;IRS2|1.866	3	558	76	21829	http://www.ebi.ac.uk/QuickGO/GTerm?id=GO:0008284	[]
5	5	regulation of defense response	GO:0031347	0.308	0.443	0.04	-0.13	6.85695	-11.527	JUN|2.208;WFDC1|0.417	2	321	76	21829	http://www.ebi.ac.uk/QuickGO/GTerm?id=GO:0031347	[]
4	4	regulation of catalytic activity	GO:0050790	0.309	0.443	2.82	1.17	6.85695	-11.527	CAV2|0.417;ACSL1|0.614;MST1R|1.705;CYR61|2.231;JUN|2.208;WFDC1|0.417;IRS2|1.866;LPAR3|2.868;DUSP8|1.567	9	2104	76	21829	http://www.ebi.ac.uk/QuickGO/GTerm?id=GO:0050790	[]
7	5,7	neural tube formation	GO:0001841	0.31	0.443	0	-0.14	6.85695	-11.527	CDH2|1.906	1	106	76	21829	http://www.ebi.ac.uk/QuickGO/GTerm?id=GO:0001841	[]
6	5,6	vacuolar transport	GO:0007034	0.31	0.443	0	-0.14	6.85695	-11.527	SPTBN5|28.402	1	106	76	21829	http://www.ebi.ac.uk/QuickGO/GTerm?id=GO:0007034	[]
7	6,7	regulation of nucleotide biosynthetic process	GO:0030808	0.31	0.443	0	-0.14	6.85695	-11.527	PPARGC1A|0.564	1	106	76	21829	http://www.ebi.ac.uk/QuickGO/GTerm?id=GO:0030808	[]
9	9	negative regulation of protein serine/threonine kinase activity	GO:0071901	0.31	0.443	0	-0.14	6.85695	-11.527	DUSP8|1.567	1	106	76	21829	http://www.ebi.ac.uk/QuickGO/GTerm?id=GO:0071901	[]
8	7,8	regulation of purine nucleotide biosynthetic process	GO:1900371	0.31	0.443	0	-0.14	6.85695	-11.527	PPARGC1A|0.564	1	106	76	21829	http://www.ebi.ac.uk/QuickGO/GTerm?id=GO:1900371	[]
8	7,8	purine nucleoside monophosphate biosynthetic process	GO:0009127	0.31	0.443	0	-0.14	6.85695	-11.527	PPARGC1A|0.564	1	106	76	21829	http://www.ebi.ac.uk/QuickGO/GTerm?id=GO:0009127	[]
6	6	stem cell differentiation	GO:0048863	0.312	0.445	0.51	0.1	6.85695	-11.527	CDH2|1.906;JAG1|1.703	2	324	76	21829	http://www.ebi.ac.uk/QuickGO/GTerm?id=GO:0048863	[]
7	7	ribonucleoside diphosphate metabolic process	GO:0009185	0.312	0.445	0	-0.14	6.85695	-11.527	HKDC1|2.366	1	107	76	21829	http://www.ebi.ac.uk/QuickGO/GTerm?id=GO:0009185	[]
7	7	positive regulation of peptidase activity	GO:0010952	0.312	0.445	0	-0.14	6.85695	-11.527	CYR61|2.231	1	107	76	21829	http://www.ebi.ac.uk/QuickGO/GTerm?id=GO:0010952	[]
6	6	fatty acid biosynthetic process	GO:0006633	0.312	0.445	0	-0.14	6.85695	-11.527	PDK4|0.421	1	107	76	21829	http://www.ebi.ac.uk/QuickGO/GTerm?id=GO:0006633	[]
10	5,6,7,8,9,10	positive regulation of protein secretion	GO:0050714	0.312	0.445	0	-0.14	6.85695	-11.527	IRS2|1.866	1	107	76	21829	http://www.ebi.ac.uk/QuickGO/GTerm?id=GO:0050714	[]
4	4	cell cycle	GO:0007049	0.314	0.446	-1.87	-1.01	6.85695	-11.527	CAV2|0.417;JUN|2.208;TOP2A|0.53;SIK1|1.694;SMC2|0.493;MZT1|0.461	6	1325	76	21829	http://www.ebi.ac.uk/QuickGO/GTerm?id=GO:0007049	[]
7	6,7	regulation of anion transport	GO:0044070	0.314	0.446	0	-0.14	6.85695	-11.527	IRS2|1.866	1	108	76	21829	http://www.ebi.ac.uk/QuickGO/GTerm?id=GO:0044070	[]
5	5	regulation of stem cell differentiation	GO:2000736	0.314	0.446	0	-0.14	6.85695	-11.527	JAG1|1.703	1	108	76	21829	http://www.ebi.ac.uk/QuickGO/GTerm?id=GO:2000736	[]
7	6,7	establishment of protein localization to plasma membrane	GO:0090002	0.314	0.446	0	-0.14	6.85695	-11.527	CDH2|1.906	1	108	76	21829	http://www.ebi.ac.uk/QuickGO/GTerm?id=GO:0090002	[]
5	5	response to ionizing radiation	GO:0010212	0.314	0.446	0	-0.14	6.85695	-11.527	EGR1|2.376	1	108	76	21829	http://www.ebi.ac.uk/QuickGO/GTerm?id=GO:0010212	[]
6	4,5,6	negative regulation of cellular metabolic process	GO:0031324	0.315	0.446	2.39	0.97	6.85695	-11.527	CHAC1|0.521;EGR1|2.376;JUN|2.208;WFDC1|0.417;SIK1|1.694;IRS2|1.866;AEBP1|2.049;DUSP8|1.567	8	1850	76	21829	http://www.ebi.ac.uk/QuickGO/GTerm?id=GO:0031324	[]
4	4	regulation of response to external stimulus	GO:0032101	0.316	0.448	0.38	0.03	6.85695	-11.527	WFDC1|0.417;KIAA1324|5.521;CRHR2|2.007	3	567	76	21829	http://www.ebi.ac.uk/QuickGO/GTerm?id=GO:0032101	[]
6	5,6	regulation of G-protein coupled receptor protein signaling pathway	GO:0008277	0.317	0.448	0	-0.14	6.85695	-11.527	CAV2|0.417	1	109	76	21829	http://www.ebi.ac.uk/QuickGO/GTerm?id=GO:0008277	[]
4	4	negative regulation of response to wounding	GO:1903035	0.317	0.448	0	-0.14	6.85695	-11.527	WFDC1|0.417	1	109	76	21829	http://www.ebi.ac.uk/QuickGO/GTerm?id=GO:1903035	[]
8	6,7,8	establishment of protein localization to mitochondrion	GO:0072655	0.319	0.451	0	-0.14	6.85695	-11.527	OSCP1|0.14	1	110	76	21829	http://www.ebi.ac.uk/QuickGO/GTerm?id=GO:0072655	[]
5	4,5	regulation of cell cycle	GO:0051726	0.32	0.453	0.08	-0.1	6.85695	-11.527	CAV2|0.417;JUN|2.208;TOP2A|0.53;SIK1|1.694	4	821	76	21829	http://www.ebi.ac.uk/QuickGO/GTerm?id=GO:0051726	[]
6	5,6	positive regulation of epithelial cell proliferation	GO:0050679	0.322	0.454	0	-0.14	6.85695	-11.527	CAV2|0.417	1	111	76	21829	http://www.ebi.ac.uk/QuickGO/GTerm?id=GO:0050679	[]
5	5	positive regulation of catalytic activity	GO:0043085	0.322	0.455	1.97	0.77	6.85695	-11.527	CAV2|0.417;ACSL1|0.614;MST1R|1.705;CYR61|2.231;JUN|2.208;LPAR3|2.868	6	1338	76	21829	http://www.ebi.ac.uk/QuickGO/GTerm?id=GO:0043085	[]
5	5	lymphocyte mediated immunity	GO:0002449	0.324	0.456	0	-0.14	6.85695	-11.527	JAG1|1.703	1	112	76	21829	http://www.ebi.ac.uk/QuickGO/GTerm?id=GO:0002449	[]
6	6	vesicle fusion	GO:0006906	0.324	0.456	0	-0.14	6.85695	-11.527	CAV2|0.417	1	112	76	21829	http://www.ebi.ac.uk/QuickGO/GTerm?id=GO:0006906	[]
8	4,5,6,7,8	mitotic cell cycle checkpoint	GO:0007093	0.324	0.456	0	-0.14	6.85695	-11.527	TOP2A|0.53	1	112	76	21829	http://www.ebi.ac.uk/QuickGO/GTerm?id=GO:0007093	[]
4	4	protein metabolic process	GO:0019538	0.325	0.457	7.33	3.26	6.85695	-11.527	RIC3|0.491;NIM1K|1.617;CAV2|0.417;ADAMTS1|1.877;ADAMTS9|0.583;CDH2|1.906;CTSK|2.109;ACSL1|0.614;MST1R|1.705;CHAC1|0.521;CYR61|2.231;EGR1|2.376;JUN|2.208;WFDC1|0.417;LAP3|0.573;SIK1|1.694;SGK2|0.559;KL|3.059;RNF144A|2.045;LPAR3|2.868;AEBP1|2.049;ANKRD6|0.513;DUSP8|1.567;PDK4|0.421	24	6254	76	21829	http://www.ebi.ac.uk/QuickGO/GTerm?id=GO:0019538	[]
4	4	regulation of transport	GO:0051049	0.326	0.458	2.66	1.09	6.85695	-11.527	CDH2|1.906;SIK1|1.694;CCK1R|5.905;OSCP1|0.14;SGK2|0.559;IRS2|1.866	6	1344	76	21829	http://www.ebi.ac.uk/QuickGO/GTerm?id=GO:0051049	[]
7	6,7	nucleoside triphosphate biosynthetic process	GO:0009142	0.326	0.458	0	-0.14	6.85695	-11.527	PPARGC1A|0.564	1	113	76	21829	http://www.ebi.ac.uk/QuickGO/GTerm?id=GO:0009142	[]
5	4,5	positive regulation of developmental growth	GO:0048639	0.326	0.458	0	-0.14	6.85695	-11.527	LPAR3|2.868	1	113	76	21829	http://www.ebi.ac.uk/QuickGO/GTerm?id=GO:0048639	[]
5	5	hemopoiesis	GO:0030097	0.327	0.458	1.13	0.38	6.85695	-11.527	EGR1|2.376;FOS|3.316;JAG1|1.703	3	578	76	21829	http://www.ebi.ac.uk/QuickGO/GTerm?id=GO:0030097	[]
10	9,10	protein ubiquitination involved in ubiquitin-dependent protein catabolic process	GO:0042787	0.329	0.46	0	-0.14	6.85695	-11.527	RNF144A|2.045	1	114	76	21829	http://www.ebi.ac.uk/QuickGO/GTerm?id=GO:0042787	[]
9	7,8,9	negative regulation of transcription from RNA polymerase II promoter	GO:0000122	0.331	0.462	1.03	0.34	6.85695	-11.527	EGR1|2.376;JUN|2.208;AEBP1|2.049	3	582	76	21829	http://www.ebi.ac.uk/QuickGO/GTerm?id=GO:0000122	[]
6	5,6	negative regulation of neuron death	GO:1901215	0.331	0.462	0	-0.14	6.85695	-11.527	PPARGC1A|0.564	1	115	76	21829	http://www.ebi.ac.uk/QuickGO/GTerm?id=GO:1901215	[]
5	5	regulation of muscle cell differentiation	GO:0051147	0.331	0.462	0	-0.14	6.85695	-11.527	SIK1|1.694	1	115	76	21829	http://www.ebi.ac.uk/QuickGO/GTerm?id=GO:0051147	[]
7	4,6,7	activation of innate immune response	GO:0002218	0.331	0.462	0	-0.14	6.85695	-11.527	JUN|2.208	1	115	76	21829	http://www.ebi.ac.uk/QuickGO/GTerm?id=GO:0002218	[]
4	4	hindbrain development	GO:0030902	0.331	0.462	0	-0.14	6.85695	-11.527	RARA|1.526	1	115	76	21829	http://www.ebi.ac.uk/QuickGO/GTerm?id=GO:0030902	[]
6	6	cellular protein modification process	GO:0006464	0.332	0.462	4.98	2.17	6.85695	-11.527	NIM1K|1.617;CAV2|0.417;CDH2|1.906;ACSL1|0.614;MST1R|1.705;CYR61|2.231;EGR1|2.376;JUN|2.208;SIK1|1.694;SGK2|0.559;KL|3.059;RNF144A|2.045;LPAR3|2.868;ANKRD6|0.513;DUSP8|1.567;PDK4|0.421	16	4053	76	21829	http://www.ebi.ac.uk/QuickGO/GTerm?id=GO:0006464	[]
5	5	protein modification process	GO:0036211	0.332	0.462	4.98	2.17	6.85695	-11.527	NIM1K|1.617;CAV2|0.417;CDH2|1.906;ACSL1|0.614;MST1R|1.705;CYR61|2.231;EGR1|2.376;JUN|2.208;SIK1|1.694;SGK2|0.559;KL|3.059;RNF144A|2.045;LPAR3|2.868;ANKRD6|0.513;DUSP8|1.567;PDK4|0.421	16	4053	76	21829	http://www.ebi.ac.uk/QuickGO/GTerm?id=GO:0036211	[]
6	5,6	neuron development	GO:0048666	0.332	0.463	1.66	0.63	6.85695	-11.527	LRFN5|1.736;GFRA3|0.646;CCK1R|5.905;LPAR3|2.868	4	836	76	21829	http://www.ebi.ac.uk/QuickGO/GTerm?id=GO:0048666	[]
7	6,7	negative regulation of MAPK cascade	GO:0043409	0.333	0.463	0	-0.14	6.85695	-11.527	DUSP8|1.567	1	116	76	21829	http://www.ebi.ac.uk/QuickGO/GTerm?id=GO:0043409	[]
7	7	regulation of axonogenesis	GO:0050770	0.333	0.463	0	-0.14	6.85695	-11.527	LPAR3|2.868	1	116	76	21829	http://www.ebi.ac.uk/QuickGO/GTerm?id=GO:0050770	[]
5	4,5	regulation of symbiosis, encompassing mutualism through parasitism	GO:0043903	0.333	0.463	0	-0.14	6.85695	-11.527	JUN|2.208	1	116	76	21829	http://www.ebi.ac.uk/QuickGO/GTerm?id=GO:0043903	[]
7	7	protein localization to mitochondrion	GO:0070585	0.333	0.463	0	-0.14	6.85695	-11.527	OSCP1|0.14	1	116	76	21829	http://www.ebi.ac.uk/QuickGO/GTerm?id=GO:0070585	[]
5	5	phospholipid metabolic process	GO:0006644	0.335	0.464	-0.01	-0.14	6.85695	-11.527	ENPP2|0.6;AGPAT2|1.693	2	342	76	21829	http://www.ebi.ac.uk/QuickGO/GTerm?id=GO:0006644	[]
6	5,6	organelle membrane fusion	GO:0090174	0.336	0.465	0	-0.14	6.85695	-11.527	CAV2|0.417	1	117	76	21829	http://www.ebi.ac.uk/QuickGO/GTerm?id=GO:0090174	[]
6	6	amino acid transport	GO:0006865	0.336	0.465	0	-0.14	6.85695	-11.527	SLC6A14|0.423	1	117	76	21829	http://www.ebi.ac.uk/QuickGO/GTerm?id=GO:0006865	[]
2	2	biological regulation	GO:0065007	0.336	0.465	15.1	6.86	6.85695	-11.527	NIM1K|1.617;CAV2|0.417;ADAMTS9|0.583;CDH2|1.906;PROM1|0.467;CRCP|0.599;ACSL1|0.614;MST1R|1.705;CHAC1|0.521;ENPP2|0.6;EVC|0.468;CYR61|2.231;EGR1|2.376;JUN|2.208;PPARGC1A|0.564;TOP2A|0.53;RARA|1.526;FOS|3.316;IGFBP1|0.446;WFDC1|0.417;HKDC1|2.366;SIK1|1.694;CCK1R|5.905;BCO1|0.596;KIAA1324|5.521;OSCP1|0.14;CHRDL1|0.429;SGK2|0.559;IRS2|1.866;KL|3.059;AGPAT2|1.693;RNF144A|2.045;LPAR3|2.868;CRHR2|2.007;…	43	11677	76	21829	http://www.ebi.ac.uk/QuickGO/GTerm?id=GO:0065007	[]
6	6	leukocyte differentiation	GO:0002521	0.337	0.466	0.9	0.27	6.85695	-11.527	EGR1|2.376;FOS|3.316	2	344	76	21829	http://www.ebi.ac.uk/QuickGO/GTerm?id=GO:0002521	[]
6	5,6	protein kinase B signaling	GO:0043491	0.338	0.466	0	-0.14	6.85695	-11.527	MST1R|1.705	1	118	76	21829	http://www.ebi.ac.uk/QuickGO/GTerm?id=GO:0043491	[]
4	4	neural precursor cell proliferation	GO:0061351	0.338	0.466	0	-0.14	6.85695	-11.527	CDH2|1.906	1	118	76	21829	http://www.ebi.ac.uk/QuickGO/GTerm?id=GO:0061351	[]
4	4	RNA localization	GO:0006403	0.338	0.466	0	-0.14	6.85695	-11.527	SIDT1|5.384	1	118	76	21829	http://www.ebi.ac.uk/QuickGO/GTerm?id=GO:0006403	[]
10	5,7,8,9,10	regulation of peptide hormone secretion	GO:0090276	0.338	0.466	0	-0.14	6.85695	-11.527	IRS2|1.866	1	118	76	21829	http://www.ebi.ac.uk/QuickGO/GTerm?id=GO:0090276	[]
6	6	cellular response to lipid	GO:0071396	0.34	0.468	0.19	-0.05	6.85695	-11.527	RARA|1.526;PDK4|0.421	2	346	76	21829	http://www.ebi.ac.uk/QuickGO/GTerm?id=GO:0071396	[]
6	6	epidermal cell differentiation	GO:0009913	0.34	0.468	0	-0.14	6.85695	-11.527	JAG1|1.703	1	119	76	21829	http://www.ebi.ac.uk/QuickGO/GTerm?id=GO:0009913	[]
9	6,7,8,9	regulation of peptide secretion	GO:0002791	0.34	0.468	0	-0.14	6.85695	-11.527	IRS2|1.866	1	119	76	21829	http://www.ebi.ac.uk/QuickGO/GTerm?id=GO:0002791	[]
5	4,5	organ growth	GO:0035265	0.34	0.468	0	-0.14	6.85695	-11.527	EVC|0.468	1	119	76	21829	http://www.ebi.ac.uk/QuickGO/GTerm?id=GO:0035265	[]
8	7,8	negative regulation of phosphorylation	GO:0042326	0.341	0.468	0.47	0.07	6.85695	-11.527	IRS2|1.866;DUSP8|1.567	2	347	76	21829	http://www.ebi.ac.uk/QuickGO/GTerm?id=GO:0042326	[]
7	7	DNA-templated transcription, initiation	GO:0006352	0.343	0.469	0	-0.14	6.85695	-11.527	CRCP|0.599	1	120	76	21829	http://www.ebi.ac.uk/QuickGO/GTerm?id=GO:0006352	[]
8	7,8	regulation of JNK cascade	GO:0046328	0.343	0.469	0	-0.14	6.85695	-11.527	ANKRD6|0.513	1	120	76	21829	http://www.ebi.ac.uk/QuickGO/GTerm?id=GO:0046328	[]
6	5,6	positive regulation of cell morphogenesis involved in differentiation	GO:0010770	0.343	0.469	0	-0.14	6.85695	-11.527	LPAR3|2.868	1	120	76	21829	http://www.ebi.ac.uk/QuickGO/GTerm?id=GO:0010770	[]
5	5	sulfur compound biosynthetic process	GO:0044272	0.345	0.472	0	-0.14	6.85695	-11.527	PDK4|0.421	1	121	76	21829	http://www.ebi.ac.uk/QuickGO/GTerm?id=GO:0044272	[]
4	4	transport	GO:0006810	0.347	0.474	-7.92	-3.82	6.85695	-11.527	SIDT1|5.384;CAV2|0.417;CDH2|1.906;SLC25A25|0.627;ACSL1|0.614;SLC2A2|0.635;ENPP2|0.6;ATP1A1|1.604;SIK1|1.694;CCK1R|5.905;OSCP1|0.14;SGK2|0.559;IRS2|1.866;SLC6A14|0.423;COX7C|0.658;SLC5A3|1.572;TRPA1|0.123;SPTBN5|28.402	18	4647	76	21829	http://www.ebi.ac.uk/QuickGO/GTerm?id=GO:0006810	[]
5	4,5	pallium development	GO:0021543	0.347	0.474	0	-0.14	6.85695	-11.527	CDH2|1.906	1	122	76	21829	http://www.ebi.ac.uk/QuickGO/GTerm?id=GO:0021543	[]
10	6,7,8,9,10	insulin secretion	GO:0030073	0.347	0.474	0	-0.14	6.85695	-11.527	IRS2|1.866	1	122	76	21829	http://www.ebi.ac.uk/QuickGO/GTerm?id=GO:0030073	[]
4	4	DNA integrity checkpoint	GO:0031570	0.347	0.474	0	-0.14	6.85695	-11.527	TOP2A|0.53	1	122	76	21829	http://www.ebi.ac.uk/QuickGO/GTerm?id=GO:0031570	[]
9	6,7,9	regulation of extrinsic apoptotic signaling pathway	GO:2001236	0.347	0.474	0	-0.14	6.85695	-11.527	KIAA1324|5.521	1	122	76	21829	http://www.ebi.ac.uk/QuickGO/GTerm?id=GO:2001236	[]
5	5	regulation of nervous system development	GO:0051960	0.348	0.474	0.97	0.31	6.85695	-11.527	CDH2|1.906;LPAR3|2.868;JAG1|1.703	3	600	76	21829	http://www.ebi.ac.uk/QuickGO/GTerm?id=GO:0051960	[]
5	5	organophosphate biosynthetic process	GO:0090407	0.349	0.475	-0.23	-0.25	6.85695	-11.527	PANK1|0.639;PPARGC1A|0.564;AGPAT2|1.693	3	601	76	21829	http://www.ebi.ac.uk/QuickGO/GTerm?id=GO:0090407	[]
5	5	organophosphate catabolic process	GO:0046434	0.35	0.475	0	-0.14	6.85695	-11.527	ENPP2|0.6	1	123	76	21829	http://www.ebi.ac.uk/QuickGO/GTerm?id=GO:0046434	[]
5	4,5	regulation of organelle assembly	GO:1902115	0.35	0.475	0	-0.14	6.85695	-11.527	KIAA1324|5.521	1	123	76	21829	http://www.ebi.ac.uk/QuickGO/GTerm?id=GO:1902115	[]
5	5	adaptive immune response based on somatic recombination of immune receptors built from immunoglobulin superfamily domains	GO:0002460	0.35	0.475	0	-0.14	6.85695	-11.527	JAG1|1.703	1	123	76	21829	http://www.ebi.ac.uk/QuickGO/GTerm?id=GO:0002460	[]
7	7	nucleoside diphosphate phosphorylation	GO:0006165	0.352	0.478	0	-0.14	6.85695	-11.527	HKDC1|2.366	1	124	76	21829	http://www.ebi.ac.uk/QuickGO/GTerm?id=GO:0006165	[]
5	5	cell projection morphogenesis	GO:0048858	0.353	0.478	0.19	-0.05	6.85695	-11.527	GFRA3|0.646;CCK1R|5.905;LPAR3|2.868	3	605	76	21829	http://www.ebi.ac.uk/QuickGO/GTerm?id=GO:0048858	[]
5	3,5	positive regulation of homeostatic process	GO:0032846	0.354	0.479	0	-0.14	6.85695	-11.527	PPARGC1A|0.564	1	125	76	21829	http://www.ebi.ac.uk/QuickGO/GTerm?id=GO:0032846	[]
8	7,8	ribonucleoside monophosphate biosynthetic process	GO:0009156	0.354	0.479	0	-0.14	6.85695	-11.527	PPARGC1A|0.564	1	125	76	21829	http://www.ebi.ac.uk/QuickGO/GTerm?id=GO:0009156	[]
6	4,6	regulation of epithelial cell migration	GO:0010632	0.354	0.479	0	-0.14	6.85695	-11.527	MCC|2.125	1	125	76	21829	http://www.ebi.ac.uk/QuickGO/GTerm?id=GO:0010632	[]
7	5,6,7	positive regulation of DNA metabolic process	GO:0051054	0.354	0.479	0	-0.14	6.85695	-11.527	PPARGC1A|0.564	1	125	76	21829	http://www.ebi.ac.uk/QuickGO/GTerm?id=GO:0051054	[]
5	5	negative regulation of catalytic activity	GO:0043086	0.355	0.48	0.38	0.03	6.85695	-11.527	WFDC1|0.417;IRS2|1.866;DUSP8|1.567	3	608	76	21829	http://www.ebi.ac.uk/QuickGO/GTerm?id=GO:0043086	[]
5	5	regulation of cell size	GO:0008361	0.356	0.481	0	-0.14	6.85695	-11.527	LPAR3|2.868	1	126	76	21829	http://www.ebi.ac.uk/QuickGO/GTerm?id=GO:0008361	[]
11	8,9,10,11	regulation of proteasomal ubiquitin-dependent protein catabolic process	GO:0032434	0.356	0.481	0	-0.14	6.85695	-11.527	RNF144A|2.045	1	126	76	21829	http://www.ebi.ac.uk/QuickGO/GTerm?id=GO:0032434	[]
7	6,7	regulation of neuron apoptotic process	GO:0043523	0.356	0.481	0	-0.14	6.85695	-11.527	PPARGC1A|0.564	1	126	76	21829	http://www.ebi.ac.uk/QuickGO/GTerm?id=GO:0043523	[]
4	4	stem cell proliferation	GO:0072089	0.359	0.483	0	-0.14	6.85695	-11.527	IRS2|1.866	1	127	76	21829	http://www.ebi.ac.uk/QuickGO/GTerm?id=GO:0072089	[]
5	5	single-organism carbohydrate catabolic process	GO:0044724	0.359	0.483	0	-0.14	6.85695	-11.527	HKDC1|2.366	1	127	76	21829	http://www.ebi.ac.uk/QuickGO/GTerm?id=GO:0044724	[]
6	6	embryonic epithelial tube formation	GO:0001838	0.361	0.485	0	-0.14	6.85695	-11.527	CDH2|1.906	1	128	76	21829	http://www.ebi.ac.uk/QuickGO/GTerm?id=GO:0001838	[]
5	4,5	developmental cell growth	GO:0048588	0.361	0.485	0	-0.14	6.85695	-11.527	LPAR3|2.868	1	128	76	21829	http://www.ebi.ac.uk/QuickGO/GTerm?id=GO:0048588	[]
8	5,6,7,8	regulation of mitotic nuclear division	GO:0007088	0.363	0.488	0	-0.14	6.85695	-11.527	CAV2|0.417	1	129	76	21829	http://www.ebi.ac.uk/QuickGO/GTerm?id=GO:0007088	[]
9	9	calcium ion transport	GO:0006816	0.364	0.488	-1.11	-0.66	6.85695	-11.527	SLC25A25|0.627;TRPA1|0.123	2	365	76	21829	http://www.ebi.ac.uk/QuickGO/GTerm?id=GO:0006816	[]
5	5	phospholipid biosynthetic process	GO:0008654	0.365	0.489	0	-0.14	6.85695	-11.527	AGPAT2|1.693	1	130	76	21829	http://www.ebi.ac.uk/QuickGO/GTerm?id=GO:0008654	[]
6	6	synaptic vesicle localization	GO:0097479	0.365	0.489	0	-0.14	6.85695	-11.527	CDH2|1.906	1	130	76	21829	http://www.ebi.ac.uk/QuickGO/GTerm?id=GO:0097479	[]
4	4	regulation of cellular localization	GO:0060341	0.366	0.489	2.18	0.87	6.85695	-11.527	CDH2|1.906;CCK1R|5.905;OSCP1|0.14;IRS2|1.866	4	878	76	21829	http://www.ebi.ac.uk/QuickGO/GTerm?id=GO:0060341	[]
4	4	hematopoietic or lymphoid organ development	GO:0048534	0.366	0.489	1.13	0.38	6.85695	-11.527	EGR1|2.376;FOS|3.316;JAG1|1.703	3	619	76	21829	http://www.ebi.ac.uk/QuickGO/GTerm?id=GO:0048534	[]
4	4	regulation of catabolic process	GO:0009894	0.366	0.489	1.32	0.47	6.85695	-11.527	KIAA1324|5.521;IRS2|1.866;RNF144A|2.045	3	619	76	21829	http://www.ebi.ac.uk/QuickGO/GTerm?id=GO:0009894	[]
6	5,6	cell part morphogenesis	GO:0032990	0.368	0.491	0.19	-0.05	6.85695	-11.527	GFRA3|0.646;CCK1R|5.905;LPAR3|2.868	3	621	76	21829	http://www.ebi.ac.uk/QuickGO/GTerm?id=GO:0032990	[]
3	3	cellular component organization	GO:0016043	0.368	0.491	-9.16	-4.39	6.85695	-11.527	RIC3|0.491;LRFN5|1.736;CAV2|0.417;CDH2|1.906;FAT1|0.605;GFRA3|0.646;CYR61|2.231;JUN|2.208;PPARGC1A|0.564;TOP2A|0.53;SDK2|2.638;IGFBP1|0.446;WFDC1|0.417;SMC2|0.493;CCK1R|5.905;KIAA1324|5.521;OSCP1|0.14;SGK2|0.559;LPAR3|2.868;SPTBN5|28.402;MZT1|0.461	21	5542	76	21829	http://www.ebi.ac.uk/QuickGO/GTerm?id=GO:0016043	[]
5	5	response to metal ion	GO:0010038	0.37	0.493	0	-0.14	6.85695	-11.527	FOS|3.316	1	132	76	21829	http://www.ebi.ac.uk/QuickGO/GTerm?id=GO:0010038	[]
4	4	spindle organization	GO:0007051	0.37	0.493	0	-0.14	6.85695	-11.527	MZT1|0.461	1	132	76	21829	http://www.ebi.ac.uk/QuickGO/GTerm?id=GO:0007051	[]
3	3	positive regulation of cellular component biogenesis	GO:0044089	0.371	0.495	1.02	0.33	6.85695	-11.527	CDH2|1.906;KIAA1324|5.521	2	371	76	21829	http://www.ebi.ac.uk/QuickGO/GTerm?id=GO:0044089	[]
4	4	meiotic cell cycle process	GO:1903046	0.372	0.495	0	-0.14	6.85695	-11.527	TOP2A|0.53	1	133	76	21829	http://www.ebi.ac.uk/QuickGO/GTerm?id=GO:1903046	[]
5	5	carbohydrate catabolic process	GO:0016052	0.372	0.495	0	-0.14	6.85695	-11.527	HKDC1|2.366	1	133	76	21829	http://www.ebi.ac.uk/QuickGO/GTerm?id=GO:0016052	[]
10	10	protein polyubiquitination	GO:0000209	0.374	0.498	0	-0.14	6.85695	-11.527	RNF144A|2.045	1	134	76	21829	http://www.ebi.ac.uk/QuickGO/GTerm?id=GO:0000209	[]
7	6,7	inorganic ion transmembrane transport	GO:0098660	0.375	0.498	-1.5	-0.84	6.85695	-11.527	SLC25A25|0.627;ATP1A1|1.604;COX7C|0.658;TRPA1|0.123	4	889	76	21829	http://www.ebi.ac.uk/QuickGO/GTerm?id=GO:0098660	[]
7	6,7	cation transmembrane transport	GO:0098655	0.376	0.499	-1.5	-0.84	6.85695	-11.527	SLC25A25|0.627;ATP1A1|1.604;COX7C|0.658;TRPA1|0.123	4	891	76	21829	http://www.ebi.ac.uk/QuickGO/GTerm?id=GO:0098655	[]
3	3	hormone metabolic process	GO:0042445	0.376	0.499	0	-0.14	6.85695	-11.527	BCO1|0.596	1	135	76	21829	http://www.ebi.ac.uk/QuickGO/GTerm?id=GO:0042445	[]
7	6,7	striated muscle cell development	GO:0055002	0.376	0.499	0	-0.14	6.85695	-11.527	CAV2|0.417	1	135	76	21829	http://www.ebi.ac.uk/QuickGO/GTerm?id=GO:0055002	[]
8	5,6,7,8	mesenchymal cell development	GO:0014031	0.376	0.499	0	-0.14	6.85695	-11.527	JAG1|1.703	1	135	76	21829	http://www.ebi.ac.uk/QuickGO/GTerm?id=GO:0014031	[]
4	4	regulation of response to stress	GO:0080134	0.378	0.5	-0.42	-0.33	6.85695	-11.527	JUN|2.208;WFDC1|0.417;KIAA1324|5.521;ANKRD6|0.513	4	894	76	21829	http://www.ebi.ac.uk/QuickGO/GTerm?id=GO:0080134	[]
5	4,5	regulation of cell-substrate adhesion	GO:0010810	0.379	0.5	0	-0.14	6.85695	-11.527	CYR61|2.231	1	136	76	21829	http://www.ebi.ac.uk/QuickGO/GTerm?id=GO:0010810	[]
8	7,8	JNK cascade	GO:0007254	0.379	0.5	0	-0.14	6.85695	-11.527	ANKRD6|0.513	1	136	76	21829	http://www.ebi.ac.uk/QuickGO/GTerm?id=GO:0007254	[]
8	6,7,8	negative regulation of transcription, DNA-templated	GO:0045892	0.379	0.501	1.26	0.44	6.85695	-11.527	EGR1|2.376;JUN|2.208;SIK1|1.694;AEBP1|2.049	4	895	76	21829	http://www.ebi.ac.uk/QuickGO/GTerm?id=GO:0045892	[]
6	5,6	regulation of cellular protein localization	GO:1903827	0.38	0.501	0.57	0.12	6.85695	-11.527	CDH2|1.906;OSCP1|0.14	2	378	76	21829	http://www.ebi.ac.uk/QuickGO/GTerm?id=GO:1903827	[]
6	5,6	negative regulation of intracellular signal transduction	GO:1902532	0.38	0.501	0.5	0.09	6.85695	-11.527	CRHR2|2.007;DUSP8|1.567	2	378	76	21829	http://www.ebi.ac.uk/QuickGO/GTerm?id=GO:1902532	[]
5	5	vacuole organization	GO:0007033	0.381	0.501	0	-0.14	6.85695	-11.527	KIAA1324|5.521	1	137	76	21829	http://www.ebi.ac.uk/QuickGO/GTerm?id=GO:0007033	[]
8	5,6,7,8	epithelial tube formation	GO:0072175	0.381	0.501	0	-0.14	6.85695	-11.527	CDH2|1.906	1	137	76	21829	http://www.ebi.ac.uk/QuickGO/GTerm?id=GO:0072175	[]
7	6,7	nucleoside monophosphate biosynthetic process	GO:0009124	0.381	0.501	0	-0.14	6.85695	-11.527	PPARGC1A|0.564	1	137	76	21829	http://www.ebi.ac.uk/QuickGO/GTerm?id=GO:0009124	[]
6	5,6	positive regulation of nucleobase-containing compound metabolic process	GO:0045935	0.381	0.501	2.07	0.82	6.85695	-11.527	CYR61|2.231;EGR1|2.376;JUN|2.208;PPARGC1A|0.564;FOS|3.316;JAG1|1.703	6	1432	76	21829	http://www.ebi.ac.uk/QuickGO/GTerm?id=GO:0045935	[]
6	6	sensory perception of mechanical stimulus	GO:0050954	0.383	0.503	0	-0.14	6.85695	-11.527	TRPA1|0.123	1	138	76	21829	http://www.ebi.ac.uk/QuickGO/GTerm?id=GO:0050954	[]
6	6	viral life cycle	GO:0019058	0.383	0.503	0	-0.14	6.85695	-11.527	CAV2|0.417	1	138	76	21829	http://www.ebi.ac.uk/QuickGO/GTerm?id=GO:0019058	[]
9	7,8,9	regulation of cysteine-type endopeptidase activity involved in apoptotic process	GO:0043281	0.385	0.504	0	-0.14	6.85695	-11.527	CYR61|2.231	1	139	76	21829	http://www.ebi.ac.uk/QuickGO/GTerm?id=GO:0043281	[]
7	7	nucleotide phosphorylation	GO:0046939	0.385	0.504	0	-0.14	6.85695	-11.527	HKDC1|2.366	1	139	76	21829	http://www.ebi.ac.uk/QuickGO/GTerm?id=GO:0046939	[]
11	6,7,8,9,11	positive regulation of neuron projection development	GO:0010976	0.385	0.504	0	-0.14	6.85695	-11.527	LPAR3|2.868	1	139	76	21829	http://www.ebi.ac.uk/QuickGO/GTerm?id=GO:0010976	[]
5	4,5	regulation of transporter activity	GO:0032409	0.385	0.504	0	-0.14	6.85695	-11.527	SGK2|0.559	1	139	76	21829	http://www.ebi.ac.uk/QuickGO/GTerm?id=GO:0032409	[]
8	8	metal ion homeostasis	GO:0055065	0.386	0.505	-0.23	-0.25	6.85695	-11.527	SGK2|0.559;KL|3.059	2	383	76	21829	http://www.ebi.ac.uk/QuickGO/GTerm?id=GO:0055065	[]
6	6	glial cell differentiation	GO:0010001	0.387	0.505	0	-0.14	6.85695	-11.527	CDH2|1.906	1	140	76	21829	http://www.ebi.ac.uk/QuickGO/GTerm?id=GO:0010001	[]
7	6,7	regulation of lymphocyte proliferation	GO:0050670	0.387	0.505	0	-0.14	6.85695	-11.527	IRS2|1.866	1	140	76	21829	http://www.ebi.ac.uk/QuickGO/GTerm?id=GO:0050670	[]
10	6,8,10	negative regulation of neuron differentiation	GO:0045665	0.387	0.505	0	-0.14	6.85695	-11.527	JAG1|1.703	1	140	76	21829	http://www.ebi.ac.uk/QuickGO/GTerm?id=GO:0045665	[]
5	4,5	multicellular organism growth	GO:0035264	0.387	0.505	0	-0.14	6.85695	-11.527	SLC25A25|0.627	1	140	76	21829	http://www.ebi.ac.uk/QuickGO/GTerm?id=GO:0035264	[]
5	5	regulation of peptide transport	GO:0090087	0.389	0.506	0	-0.14	6.85695	-11.527	IRS2|1.866	1	141	76	21829	http://www.ebi.ac.uk/QuickGO/GTerm?id=GO:0090087	[]
8	7,8	nicotinamide nucleotide metabolic process	GO:0046496	0.389	0.506	0	-0.14	6.85695	-11.527	HKDC1|2.366	1	141	76	21829	http://www.ebi.ac.uk/QuickGO/GTerm?id=GO:0046496	[]
6	6	regulation of mononuclear cell proliferation	GO:0032944	0.389	0.506	0	-0.14	6.85695	-11.527	IRS2|1.866	1	141	76	21829	http://www.ebi.ac.uk/QuickGO/GTerm?id=GO:0032944	[]
7	6,7	pyridine nucleotide metabolic process	GO:0019362	0.389	0.506	0	-0.14	6.85695	-11.527	HKDC1|2.366	1	141	76	21829	http://www.ebi.ac.uk/QuickGO/GTerm?id=GO:0019362	[]
6	5,6	second-messenger-mediated signaling	GO:0019932	0.389	0.506	0	-0.14	6.85695	-11.527	CRHR2|2.007	1	141	76	21829	http://www.ebi.ac.uk/QuickGO/GTerm?id=GO:0019932	[]
7	6,7	positive regulation of apoptotic process	GO:0043065	0.391	0.508	-0.07	-0.18	6.85695	-11.527	CYR61|2.231;TOP2A|0.53	2	387	76	21829	http://www.ebi.ac.uk/QuickGO/GTerm?id=GO:0043065	[]
6	4,6	positive regulation of ion transport	GO:0043270	0.392	0.508	0	-0.14	6.85695	-11.527	SGK2|0.559	1	142	76	21829	http://www.ebi.ac.uk/QuickGO/GTerm?id=GO:0043270	[]
7	7	myeloid leukocyte differentiation	GO:0002573	0.392	0.508	0	-0.14	6.85695	-11.527	FOS|3.316	1	142	76	21829	http://www.ebi.ac.uk/QuickGO/GTerm?id=GO:0002573	[]
6	5,6	positive regulation of innate immune response	GO:0045089	0.394	0.51	0	-0.14	6.85695	-11.527	JUN|2.208	1	143	76	21829	http://www.ebi.ac.uk/QuickGO/GTerm?id=GO:0045089	[]
7	6,7	regulation of stress-activated MAPK cascade	GO:0032872	0.394	0.51	0	-0.14	6.85695	-11.527	ANKRD6|0.513	1	143	76	21829	http://www.ebi.ac.uk/QuickGO/GTerm?id=GO:0032872	[]
7	7	negative regulation of nucleic acid-templated transcription	GO:1903507	0.394	0.51	1.26	0.44	6.85695	-11.527	EGR1|2.376;JUN|2.208;SIK1|1.694;AEBP1|2.049	4	914	76	21829	http://www.ebi.ac.uk/QuickGO/GTerm?id=GO:1903507	[]
6	5,6	positive regulation of programmed cell death	GO:0043068	0.395	0.511	-0.07	-0.18	6.85695	-11.527	CYR61|2.231;TOP2A|0.53	2	390	76	21829	http://www.ebi.ac.uk/QuickGO/GTerm?id=GO:0043068	[]
6	5,6	regulation of stress-activated protein kinase signaling cascade	GO:0070302	0.396	0.511	0	-0.14	6.85695	-11.527	ANKRD6|0.513	1	144	76	21829	http://www.ebi.ac.uk/QuickGO/GTerm?id=GO:0070302	[]
6	5,6	single-organism membrane fusion	GO:0044801	0.396	0.511	0	-0.14	6.85695	-11.527	CAV2|0.417	1	144	76	21829	http://www.ebi.ac.uk/QuickGO/GTerm?id=GO:0044801	[]
5	5	regulation of leukocyte proliferation	GO:0070663	0.398	0.513	0	-0.14	6.85695	-11.527	IRS2|1.866	1	145	76	21829	http://www.ebi.ac.uk/QuickGO/GTerm?id=GO:0070663	[]
7	5,6,7	mitotic sister chromatid segregation	GO:0000070	0.398	0.513	0	-0.14	6.85695	-11.527	SMC2|0.493	1	145	76	21829	http://www.ebi.ac.uk/QuickGO/GTerm?id=GO:0000070	[]
6	6	nucleoside diphosphate metabolic process	GO:0009132	0.4	0.515	0	-0.14	6.85695	-11.527	HKDC1|2.366	1	146	76	21829	http://www.ebi.ac.uk/QuickGO/GTerm?id=GO:0009132	[]
6	6	fat cell differentiation	GO:0045444	0.4	0.515	0	-0.14	6.85695	-11.527	JAG1|1.703	1	146	76	21829	http://www.ebi.ac.uk/QuickGO/GTerm?id=GO:0045444	[]
4	4	gonad development	GO:0008406	0.4	0.515	0	-0.14	6.85695	-11.527	ADAMTS1|1.877	1	146	76	21829	http://www.ebi.ac.uk/QuickGO/GTerm?id=GO:0008406	[]
6	6	negative regulation of RNA biosynthetic process	GO:1902679	0.401	0.515	1.26	0.44	6.85695	-11.527	EGR1|2.376;JUN|2.208;SIK1|1.694;AEBP1|2.049	4	922	76	21829	http://www.ebi.ac.uk/QuickGO/GTerm?id=GO:1902679	[]
3	3	immune system development	GO:0002520	0.401	0.515	1.13	0.38	6.85695	-11.527	EGR1|2.376;FOS|3.316;JAG1|1.703	3	656	76	21829	http://www.ebi.ac.uk/QuickGO/GTerm?id=GO:0002520	[]
6	5,6	positive regulation of gene expression	GO:0010628	0.401	0.515	2.07	0.82	6.85695	-11.527	CYR61|2.231;EGR1|2.376;JUN|2.208;PPARGC1A|0.564;FOS|3.316;JAG1|1.703	6	1463	76	21829	http://www.ebi.ac.uk/QuickGO/GTerm?id=GO:0010628	[]
4	4	regulation of protein localization	GO:0032880	0.402	0.516	0.85	0.25	6.85695	-11.527	CDH2|1.906;OSCP1|0.14;IRS2|1.866	3	657	76	21829	http://www.ebi.ac.uk/QuickGO/GTerm?id=GO:0032880	[]
7	7	monocarboxylic acid biosynthetic process	GO:0072330	0.402	0.516	0	-0.14	6.85695	-11.527	PDK4|0.421	1	147	76	21829	http://www.ebi.ac.uk/QuickGO/GTerm?id=GO:0072330	[]
5	5	regulation of cell development	GO:0060284	0.403	0.516	0.97	0.31	6.85695	-11.527	CDH2|1.906;LPAR3|2.868;JAG1|1.703	3	658	76	21829	http://www.ebi.ac.uk/QuickGO/GTerm?id=GO:0060284	[]
8	8	regulation of cysteine-type endopeptidase activity	GO:2000116	0.404	0.516	0	-0.14	6.85695	-11.527	CYR61|2.231	1	148	76	21829	http://www.ebi.ac.uk/QuickGO/GTerm?id=GO:2000116	[]
5	5	pyridine-containing compound metabolic process	GO:0072524	0.404	0.516	0	-0.14	6.85695	-11.527	HKDC1|2.366	1	148	76	21829	http://www.ebi.ac.uk/QuickGO/GTerm?id=GO:0072524	[]
3	3	multi-organism cellular process	GO:0044764	0.404	0.516	0	-0.14	6.85695	-11.527	CAV2|0.417	1	148	76	21829	http://www.ebi.ac.uk/QuickGO/GTerm?id=GO:0044764	[]
5	5	organelle fusion	GO:0048284	0.404	0.516	0	-0.14	6.85695	-11.527	CAV2|0.417	1	148	76	21829	http://www.ebi.ac.uk/QuickGO/GTerm?id=GO:0048284	[]
6	5,6	positive regulation of protein catabolic process	GO:0045732	0.404	0.516	0	-0.14	6.85695	-11.527	RNF144A|2.045	1	148	76	21829	http://www.ebi.ac.uk/QuickGO/GTerm?id=GO:0045732	[]
9	5,8,9	positive regulation of sequence-specific DNA binding transcription factor activity	GO:0051091	0.406	0.517	0	-0.14	6.85695	-11.527	PPARGC1A|0.564	1	149	76	21829	http://www.ebi.ac.uk/QuickGO/GTerm?id=GO:0051091	[]
4	4	leukocyte mediated immunity	GO:0002443	0.406	0.517	0	-0.14	6.85695	-11.527	JAG1|1.703	1	149	76	21829	http://www.ebi.ac.uk/QuickGO/GTerm?id=GO:0002443	[]
7	7	regulation of purine nucleotide metabolic process	GO:1900542	0.406	0.517	0	-0.14	6.85695	-11.527	PPARGC1A|0.564	1	149	76	21829	http://www.ebi.ac.uk/QuickGO/GTerm?id=GO:1900542	[]
4	4	development of primary sexual characteristics	GO:0045137	0.406	0.517	0	-0.14	6.85695	-11.527	ADAMTS1|1.877	1	149	76	21829	http://www.ebi.ac.uk/QuickGO/GTerm?id=GO:0045137	[]
4	4	tube formation	GO:0035148	0.406	0.517	0	-0.14	6.85695	-11.527	CDH2|1.906	1	149	76	21829	http://www.ebi.ac.uk/QuickGO/GTerm?id=GO:0035148	[]
5	4,5	positive regulation of cell death	GO:0010942	0.407	0.518	-0.07	-0.18	6.85695	-11.527	CYR61|2.231;TOP2A|0.53	2	400	76	21829	http://www.ebi.ac.uk/QuickGO/GTerm?id=GO:0010942	[]
7	5,6,7	regulation of nuclear division	GO:0051783	0.41	0.52	0	-0.14	6.85695	-11.527	CAV2|0.417	1	151	76	21829	http://www.ebi.ac.uk/QuickGO/GTerm?id=GO:0051783	[]
6	6	neuron apoptotic process	GO:0051402	0.41	0.52	0	-0.14	6.85695	-11.527	PPARGC1A|0.564	1	151	76	21829	http://www.ebi.ac.uk/QuickGO/GTerm?id=GO:0051402	[]
6	5,6	muscle cell development	GO:0055001	0.41	0.52	0	-0.14	6.85695	-11.527	CAV2|0.417	1	151	76	21829	http://www.ebi.ac.uk/QuickGO/GTerm?id=GO:0055001	[]
9	8,9	sodium ion transmembrane transport	GO:0035725	0.41	0.52	0	-0.14	6.85695	-11.527	ATP1A1|1.604	1	151	76	21829	http://www.ebi.ac.uk/QuickGO/GTerm?id=GO:0035725	[]
6	6	fibril organization	GO:0097435	0.412	0.522	-0.55	-0.4	6.85695	-11.527	FAT1|0.605;MZT1|0.461	2	404	76	21829	http://www.ebi.ac.uk/QuickGO/GTerm?id=GO:0097435	[]
6	5,6	negative regulation of gene expression	GO:0010629	0.412	0.522	1.54	0.57	6.85695	-11.527	CHAC1|0.521;EGR1|2.376;JUN|2.208;SIK1|1.694;AEBP1|2.049	5	1208	76	21829	http://www.ebi.ac.uk/QuickGO/GTerm?id=GO:0010629	[]
3	3	negative regulation of developmental process	GO:0051093	0.414	0.524	0.81	0.24	6.85695	-11.527	CDH2|1.906;CRHR2|2.007;JAG1|1.703	3	670	76	21829	http://www.ebi.ac.uk/QuickGO/GTerm?id=GO:0051093	[]
5	5	macromolecule modification	GO:0043412	0.416	0.526	4.98	2.17	6.85695	-11.527	NIM1K|1.617;CAV2|0.417;CDH2|1.906;ACSL1|0.614;MST1R|1.705;CYR61|2.231;EGR1|2.376;JUN|2.208;SIK1|1.694;SGK2|0.559;KL|3.059;RNF144A|2.045;LPAR3|2.868;ANKRD6|0.513;DUSP8|1.567;PDK4|0.421	16	4270	76	21829	http://www.ebi.ac.uk/QuickGO/GTerm?id=GO:0043412	[]
6	6	regulation of nucleotide metabolic process	GO:0006140	0.417	0.526	0	-0.14	6.85695	-11.527	PPARGC1A|0.564	1	154	76	21829	http://www.ebi.ac.uk/QuickGO/GTerm?id=GO:0006140	[]
4	3,4	meiotic cell cycle	GO:0051321	0.421	0.529	0	-0.14	6.85695	-11.527	TOP2A|0.53	1	156	76	21829	http://www.ebi.ac.uk/QuickGO/GTerm?id=GO:0051321	[]
5	5	morphogenesis of embryonic epithelium	GO:0016331	0.421	0.529	0	-0.14	6.85695	-11.527	CDH2|1.906	1	156	76	21829	http://www.ebi.ac.uk/QuickGO/GTerm?id=GO:0016331	[]
4	4	establishment or maintenance of cell polarity	GO:0007163	0.421	0.529	0	-0.14	6.85695	-11.527	FAT1|0.605	1	156	76	21829	http://www.ebi.ac.uk/QuickGO/GTerm?id=GO:0007163	[]
7	5,6,7	positive regulation of cytoplasmic transport	GO:1903651	0.421	0.529	0	-0.14	6.85695	-11.527	OSCP1|0.14	1	156	76	21829	http://www.ebi.ac.uk/QuickGO/GTerm?id=GO:1903651	[]
5	5	epidermis development	GO:0008544	0.421	0.529	0	-0.14	6.85695	-11.527	JAG1|1.703	1	156	76	21829	http://www.ebi.ac.uk/QuickGO/GTerm?id=GO:0008544	[]
5	5	regulation of organ morphogenesis	GO:2000027	0.421	0.529	0	-0.14	6.85695	-11.527	ANKRD6|0.513	1	156	76	21829	http://www.ebi.ac.uk/QuickGO/GTerm?id=GO:2000027	[]
4	4	positive regulation of nitrogen compound metabolic process	GO:0051173	0.422	0.529	2.07	0.82	6.85695	-11.527	CYR61|2.231;EGR1|2.376;JUN|2.208;PPARGC1A|0.564;FOS|3.316;JAG1|1.703	6	1496	76	21829	http://www.ebi.ac.uk/QuickGO/GTerm?id=GO:0051173	[]
4	3,4	regulation of cellular component biogenesis	GO:0044087	0.423	0.529	1.37	0.49	6.85695	-11.527	CDH2|1.906;CYR61|2.231;KIAA1324|5.521	3	679	76	21829	http://www.ebi.ac.uk/QuickGO/GTerm?id=GO:0044087	[]
5	5	cardiac muscle tissue development	GO:0048738	0.423	0.529	0	-0.14	6.85695	-11.527	SIK1|1.694	1	157	76	21829	http://www.ebi.ac.uk/QuickGO/GTerm?id=GO:0048738	[]
8	5,6,7,8	negative regulation of apoptotic signaling pathway	GO:2001234	0.423	0.529	0	-0.14	6.85695	-11.527	KIAA1324|5.521	1	157	76	21829	http://www.ebi.ac.uk/QuickGO/GTerm?id=GO:2001234	[]
9	7,8,9	peptide hormone secretion	GO:0030072	0.423	0.529	0	-0.14	6.85695	-11.527	IRS2|1.866	1	157	76	21829	http://www.ebi.ac.uk/QuickGO/GTerm?id=GO:0030072	[]
8	5,6,7,8	positive regulation of lymphocyte activation	GO:0051251	0.423	0.529	0	-0.14	6.85695	-11.527	IRS2|1.866	1	157	76	21829	http://www.ebi.ac.uk/QuickGO/GTerm?id=GO:0051251	[]
7	7	divalent inorganic cation transport	GO:0072511	0.423	0.529	-1.11	-0.66	6.85695	-11.527	SLC25A25|0.627;TRPA1|0.123	2	413	76	21829	http://www.ebi.ac.uk/QuickGO/GTerm?id=GO:0072511	[]
8	8	divalent metal ion transport	GO:0070838	0.423	0.529	-1.11	-0.66	6.85695	-11.527	SLC25A25|0.627;TRPA1|0.123	2	413	76	21829	http://www.ebi.ac.uk/QuickGO/GTerm?id=GO:0070838	[]
7	5,6,7	negative regulation of RNA metabolic process	GO:0051253	0.423	0.529	1.26	0.44	6.85695	-11.527	EGR1|2.376;JUN|2.208;SIK1|1.694;AEBP1|2.049	4	950	76	21829	http://www.ebi.ac.uk/QuickGO/GTerm?id=GO:0051253	[]
3	3	negative regulation of metabolic process	GO:0009892	0.424	0.53	2.39	0.97	6.85695	-11.527	CHAC1|0.521;EGR1|2.376;JUN|2.208;WFDC1|0.417;SIK1|1.694;IRS2|1.866;AEBP1|2.049;DUSP8|1.567	8	2053	76	21829	http://www.ebi.ac.uk/QuickGO/GTerm?id=GO:0009892	[]
8	7,8	hydrogen ion transmembrane transport	GO:1902600	0.425	0.53	0	-0.14	6.85695	-11.527	COX7C|0.658	1	158	76	21829	http://www.ebi.ac.uk/QuickGO/GTerm?id=GO:1902600	[]
5	5	cellular protein metabolic process	GO:0044267	0.425	0.53	6.27	2.77	6.85695	-11.527	RIC3|0.491;NIM1K|1.617;CAV2|0.417;CDH2|1.906;CTSK|2.109;ACSL1|0.614;MST1R|1.705;CHAC1|0.521;CYR61|2.231;EGR1|2.376;JUN|2.208;WFDC1|0.417;SIK1|1.694;SGK2|0.559;KL|3.059;RNF144A|2.045;LPAR3|2.868;ANKRD6|0.513;DUSP8|1.567;PDK4|0.421	20	5420	76	21829	http://www.ebi.ac.uk/QuickGO/GTerm?id=GO:0044267	[]
4	4	lymphocyte activation	GO:0046649	0.425	0.53	0.65	0.16	6.85695	-11.527	EGR1|2.376;IRS2|1.866	2	415	76	21829	http://www.ebi.ac.uk/QuickGO/GTerm?id=GO:0046649	[]
9	7,9	regulation of neuron differentiation	GO:0045664	0.426	0.531	0.69	0.18	6.85695	-11.527	LPAR3|2.868;JAG1|1.703	2	416	76	21829	http://www.ebi.ac.uk/QuickGO/GTerm?id=GO:0045664	[]
6	4,6	response to virus	GO:0009615	0.427	0.531	0	-0.14	6.85695	-11.527	MST1R|1.705	1	159	76	21829	http://www.ebi.ac.uk/QuickGO/GTerm?id=GO:0009615	[]
6	5,6	regulation of neuron death	GO:1901214	0.427	0.531	0	-0.14	6.85695	-11.527	PPARGC1A|0.564	1	159	76	21829	http://www.ebi.ac.uk/QuickGO/GTerm?id=GO:1901214	[]
6	6	cellular response to cytokine stimulus	GO:0071345	0.428	0.532	-0.16	-0.22	6.85695	-11.527	ACSL1|0.614;EGR1|2.376	2	417	76	21829	http://www.ebi.ac.uk/QuickGO/GTerm?id=GO:0071345	[]
7	5,6,7	steroid hormone mediated signaling pathway	GO:0043401	0.429	0.532	0	-0.14	6.85695	-11.527	RARA|1.526	1	160	76	21829	http://www.ebi.ac.uk/QuickGO/GTerm?id=GO:0043401	[]
6	6	oxidoreduction coenzyme metabolic process	GO:0006733	0.429	0.532	0	-0.14	6.85695	-11.527	HKDC1|2.366	1	160	76	21829	http://www.ebi.ac.uk/QuickGO/GTerm?id=GO:0006733	[]
2	2	cellular component organization or biogenesis	GO:0071840	0.43	0.534	-9.16	-4.39	6.85695	-11.527	RIC3|0.491;LRFN5|1.736;CAV2|0.417;CDH2|1.906;FAT1|0.605;GFRA3|0.646;CYR61|2.231;JUN|2.208;PPARGC1A|0.564;TOP2A|0.53;SDK2|2.638;IGFBP1|0.446;WFDC1|0.417;SMC2|0.493;CCK1R|5.905;KIAA1324|5.521;OSCP1|0.14;SGK2|0.559;LPAR3|2.868;SPTBN5|28.402;MZT1|0.461	21	5717	76	21829	http://www.ebi.ac.uk/QuickGO/GTerm?id=GO:0071840	[]
6	5,6	organic hydroxy compound transport	GO:0015850	0.431	0.534	0	-0.14	6.85695	-11.527	SLC5A3|1.572	1	161	76	21829	http://www.ebi.ac.uk/QuickGO/GTerm?id=GO:0015850	[]
4	4	negative regulation of cell adhesion	GO:0007162	0.431	0.534	0	-0.14	6.85695	-11.527	CDH2|1.906	1	161	76	21829	http://www.ebi.ac.uk/QuickGO/GTerm?id=GO:0007162	[]
3	3	cellular component biogenesis	GO:0044085	0.432	0.535	4.73	2.05	6.85695	-11.527	RIC3|0.491;CAV2|0.417;CDH2|1.906;CYR61|2.231;SDK2|2.638;KIAA1324|5.521;LPAR3|2.868;SPTBN5|28.402;MZT1|0.461	9	2346	76	21829	http://www.ebi.ac.uk/QuickGO/GTerm?id=GO:0044085	[]
7	6,7	mesenchymal cell differentiation	GO:0048762	0.435	0.537	0	-0.14	6.85695	-11.527	JAG1|1.703	1	163	76	21829	http://www.ebi.ac.uk/QuickGO/GTerm?id=GO:0048762	[]
6	6	T cell differentiation	GO:0030217	0.435	0.537	0	-0.14	6.85695	-11.527	EGR1|2.376	1	163	76	21829	http://www.ebi.ac.uk/QuickGO/GTerm?id=GO:0030217	[]
4	4	regulation of synapse structure or activity	GO:0050803	0.435	0.537	0	-0.14	6.85695	-11.527	CDH2|1.906	1	163	76	21829	http://www.ebi.ac.uk/QuickGO/GTerm?id=GO:0050803	[]
8	5,6,8	extrinsic apoptotic signaling pathway	GO:0097191	0.437	0.538	0	-0.14	6.85695	-11.527	KIAA1324|5.521	1	164	76	21829	http://www.ebi.ac.uk/QuickGO/GTerm?id=GO:0097191	[]
7	6,7	stress-activated MAPK cascade	GO:0051403	0.437	0.538	0	-0.14	6.85695	-11.527	ANKRD6|0.513	1	164	76	21829	http://www.ebi.ac.uk/QuickGO/GTerm?id=GO:0051403	[]
4	4	adaptive immune response	GO:0002250	0.437	0.538	0	-0.14	6.85695	-11.527	JAG1|1.703	1	164	76	21829	http://www.ebi.ac.uk/QuickGO/GTerm?id=GO:0002250	[]
4	4	neural tube development	GO:0021915	0.437	0.538	0	-0.14	6.85695	-11.527	CDH2|1.906	1	164	76	21829	http://www.ebi.ac.uk/QuickGO/GTerm?id=GO:0021915	[]
7	6,7	nucleotide biosynthetic process	GO:0009165	0.437	0.538	-0.44	-0.35	6.85695	-11.527	PANK1|0.639;PPARGC1A|0.564	2	425	76	21829	http://www.ebi.ac.uk/QuickGO/GTerm?id=GO:0009165	[]
5	5	detection of chemical stimulus involved in sensory perception	GO:0050907	0.439	0.539	0	-0.14	6.85695	-11.527	TRPA1|0.123	1	165	76	21829	http://www.ebi.ac.uk/QuickGO/GTerm?id=GO:0050907	[]
6	5,6	regulation of innate immune response	GO:0045088	0.439	0.539	0	-0.14	6.85695	-11.527	JUN|2.208	1	165	76	21829	http://www.ebi.ac.uk/QuickGO/GTerm?id=GO:0045088	[]
2	2	immune system process	GO:0002376	0.439	0.539	1.96	0.77	6.85695	-11.527	ENPP2|0.6;EGR1|2.376;JUN|2.208;FOS|3.316;IRS2|1.866;JAG1|1.703	6	1523	76	21829	http://www.ebi.ac.uk/QuickGO/GTerm?id=GO:0002376	[]
5	5	organic substance transport	GO:0071702	0.441	0.541	-3.04	-1.55	6.85695	-11.527	SIDT1|5.384;SLC25A25|0.627;ACSL1|0.614;SLC2A2|0.635;OSCP1|0.14;IRS2|1.866;SLC6A14|0.423;SLC5A3|1.572	8	2083	76	21829	http://www.ebi.ac.uk/QuickGO/GTerm?id=GO:0071702	[]
5	5	B cell activation	GO:0042113	0.441	0.541	0	-0.14	6.85695	-11.527	IRS2|1.866	1	166	76	21829	http://www.ebi.ac.uk/QuickGO/GTerm?id=GO:0042113	[]
7	7	regulation of macroautophagy	GO:0016241	0.447	0.547	0	-0.14	6.85695	-11.527	KIAA1324|5.521	1	169	76	21829	http://www.ebi.ac.uk/QuickGO/GTerm?id=GO:0016241	[]
8	7,8	regulation of ERK1 and ERK2 cascade	GO:0070372	0.447	0.547	0	-0.14	6.85695	-11.527	CYR61|2.231	1	169	76	21829	http://www.ebi.ac.uk/QuickGO/GTerm?id=GO:0070372	[]
5	5	regulation of leukocyte differentiation	GO:1902105	0.447	0.547	0	-0.14	6.85695	-11.527	FOS|3.316	1	169	76	21829	http://www.ebi.ac.uk/QuickGO/GTerm?id=GO:1902105	[]
6	5,6	nucleoside phosphate biosynthetic process	GO:1901293	0.448	0.548	-0.44	-0.35	6.85695	-11.527	PANK1|0.639;PPARGC1A|0.564	2	434	76	21829	http://www.ebi.ac.uk/QuickGO/GTerm?id=GO:1901293	[]
7	6,7	protein localization to plasma membrane	GO:0072659	0.449	0.548	0	-0.14	6.85695	-11.527	CDH2|1.906	1	170	76	21829	http://www.ebi.ac.uk/QuickGO/GTerm?id=GO:0072659	[]
4	4	positive regulation of leukocyte activation	GO:0002696	0.449	0.548	0	-0.14	6.85695	-11.527	IRS2|1.866	1	170	76	21829	http://www.ebi.ac.uk/QuickGO/GTerm?id=GO:0002696	[]
4	4	cell division	GO:0051301	0.449	0.548	-0.69	-0.46	6.85695	-11.527	CAV2|0.417;SMC2|0.493	2	435	76	21829	http://www.ebi.ac.uk/QuickGO/GTerm?id=GO:0051301	[]
3	3	cell cycle process	GO:0022402	0.45	0.549	-1.3	-0.74	6.85695	-11.527	CAV2|0.417;TOP2A|0.53;SMC2|0.493;MZT1|0.461	4	984	76	21829	http://www.ebi.ac.uk/QuickGO/GTerm?id=GO:0022402	[]
8	5,7,8	regulation of secretion by cell	GO:1903530	0.45	0.549	1.04	0.34	6.85695	-11.527	CCK1R|5.905;IRS2|1.866	2	436	76	21829	http://www.ebi.ac.uk/QuickGO/GTerm?id=GO:1903530	[]
6	5,6	neurotransmitter transport	GO:0006836	0.45	0.549	0	-0.14	6.85695	-11.527	SLC6A14|0.423	1	171	76	21829	http://www.ebi.ac.uk/QuickGO/GTerm?id=GO:0006836	[]
4	4	positive regulation of response to external stimulus	GO:0032103	0.452	0.551	0	-0.14	6.85695	-11.527	KIAA1324|5.521	1	172	76	21829	http://www.ebi.ac.uk/QuickGO/GTerm?id=GO:0032103	[]
7	5,6,7	negative regulation of mitotic cell cycle	GO:0045930	0.452	0.551	0	-0.14	6.85695	-11.527	TOP2A|0.53	1	172	76	21829	http://www.ebi.ac.uk/QuickGO/GTerm?id=GO:0045930	[]
7	7	gliogenesis	GO:0042063	0.454	0.552	0	-0.14	6.85695	-11.527	CDH2|1.906	1	173	76	21829	http://www.ebi.ac.uk/QuickGO/GTerm?id=GO:0042063	[]
8	4,5,6,7,8	positive regulation of intracellular protein transport	GO:0090316	0.454	0.552	0	-0.14	6.85695	-11.527	OSCP1|0.14	1	173	76	21829	http://www.ebi.ac.uk/QuickGO/GTerm?id=GO:0090316	[]
4	4	bone development	GO:0060348	0.454	0.552	0	-0.14	6.85695	-11.527	EVC|0.468	1	173	76	21829	http://www.ebi.ac.uk/QuickGO/GTerm?id=GO:0060348	[]
7	4,5,7	apoptotic signaling pathway	GO:0097190	0.455	0.552	-0.46	-0.35	6.85695	-11.527	CHAC1|0.521;KIAA1324|5.521	2	440	76	21829	http://www.ebi.ac.uk/QuickGO/GTerm?id=GO:0097190	[]
7	5,6,7	negative regulation of phosphorus metabolic process	GO:0010563	0.456	0.553	0.47	0.07	6.85695	-11.527	IRS2|1.866;DUSP8|1.567	2	441	76	21829	http://www.ebi.ac.uk/QuickGO/GTerm?id=GO:0010563	[]
6	6	negative regulation of phosphate metabolic process	GO:0045936	0.456	0.553	0.47	0.07	6.85695	-11.527	IRS2|1.866;DUSP8|1.567	2	441	76	21829	http://www.ebi.ac.uk/QuickGO/GTerm?id=GO:0045936	[]
9	5,7,9	negative regulation of neurogenesis	GO:0050768	0.456	0.553	0	-0.14	6.85695	-11.527	JAG1|1.703	1	174	76	21829	http://www.ebi.ac.uk/QuickGO/GTerm?id=GO:0050768	[]
5	5	response to endoplasmic reticulum stress	GO:0034976	0.458	0.554	0	-0.14	6.85695	-11.527	CHAC1|0.521	1	175	76	21829	http://www.ebi.ac.uk/QuickGO/GTerm?id=GO:0034976	[]
6	6	protein localization to cell periphery	GO:1990778	0.458	0.554	0	-0.14	6.85695	-11.527	CDH2|1.906	1	175	76	21829	http://www.ebi.ac.uk/QuickGO/GTerm?id=GO:1990778	[]
6	6	epithelial cell migration	GO:0010631	0.458	0.554	0	-0.14	6.85695	-11.527	MCC|2.125	1	175	76	21829	http://www.ebi.ac.uk/QuickGO/GTerm?id=GO:0010631	[]
6	5,6	regulation of inflammatory response	GO:0050727	0.458	0.554	0	-0.14	6.85695	-11.527	WFDC1|0.417	1	175	76	21829	http://www.ebi.ac.uk/QuickGO/GTerm?id=GO:0050727	[]
6	4,5,6	positive regulation of cell activation	GO:0050867	0.46	0.555	0	-0.14	6.85695	-11.527	IRS2|1.866	1	176	76	21829	http://www.ebi.ac.uk/QuickGO/GTerm?id=GO:0050867	[]
5	4,5	cellular modified amino acid metabolic process	GO:0006575	0.46	0.555	0	-0.14	6.85695	-11.527	CHAC1|0.521	1	176	76	21829	http://www.ebi.ac.uk/QuickGO/GTerm?id=GO:0006575	[]
3	3	taxis	GO:0042330	0.462	0.557	-0.41	-0.33	6.85695	-11.527	GFRA3|0.646;ENPP2|0.6	2	446	76	21829	http://www.ebi.ac.uk/QuickGO/GTerm?id=GO:0042330	[]
4	4	chemotaxis	GO:0006935	0.462	0.557	-0.41	-0.33	6.85695	-11.527	GFRA3|0.646;ENPP2|0.6	2	446	76	21829	http://www.ebi.ac.uk/QuickGO/GTerm?id=GO:0006935	[]
4	4	inner ear development	GO:0048839	0.464	0.559	0	-0.14	6.85695	-11.527	JAG1|1.703	1	178	76	21829	http://www.ebi.ac.uk/QuickGO/GTerm?id=GO:0048839	[]
6	6	endocytosis	GO:0006897	0.464	0.559	-0.6	-0.42	6.85695	-11.527	CAV2|0.417;ENPP2|0.6	2	448	76	21829	http://www.ebi.ac.uk/QuickGO/GTerm?id=GO:0006897	[]
4	4	cellular response to abiotic stimulus	GO:0071214	0.466	0.559	0	-0.14	6.85695	-11.527	EGR1|2.376	1	179	76	21829	http://www.ebi.ac.uk/QuickGO/GTerm?id=GO:0071214	[]
5	5	epithelium migration	GO:0090132	0.466	0.559	0	-0.14	6.85695	-11.527	MCC|2.125	1	179	76	21829	http://www.ebi.ac.uk/QuickGO/GTerm?id=GO:0090132	[]
7	6,7	ERK1 and ERK2 cascade	GO:0070371	0.466	0.559	0	-0.14	6.85695	-11.527	CYR61|2.231	1	179	76	21829	http://www.ebi.ac.uk/QuickGO/GTerm?id=GO:0070371	[]
3	3	negative regulation of multicellular organismal process	GO:0051241	0.466	0.559	0.86	0.26	6.85695	-11.527	CRHR2|2.007;JAG1|1.703;MCC|2.125	3	726	76	21829	http://www.ebi.ac.uk/QuickGO/GTerm?id=GO:0051241	[]
5	5	membrane fusion	GO:0061025	0.468	0.561	0	-0.14	6.85695	-11.527	CAV2|0.417	1	180	76	21829	http://www.ebi.ac.uk/QuickGO/GTerm?id=GO:0061025	[]
4	3,4	regulation of cell adhesion	GO:0030155	0.469	0.562	0.63	0.15	6.85695	-11.527	CDH2|1.906;CYR61|2.231	2	452	76	21829	http://www.ebi.ac.uk/QuickGO/GTerm?id=GO:0030155	[]
5	4,5	positive regulation of defense response	GO:0031349	0.469	0.562	0	-0.14	6.85695	-11.527	JUN|2.208	1	181	76	21829	http://www.ebi.ac.uk/QuickGO/GTerm?id=GO:0031349	[]
4	4	tissue migration	GO:0090130	0.471	0.564	0	-0.14	6.85695	-11.527	MCC|2.125	1	182	76	21829	http://www.ebi.ac.uk/QuickGO/GTerm?id=GO:0090130	[]
5	4,5	negative regulation of cell proliferation	GO:0008285	0.472	0.565	0.05	-0.12	6.85695	-11.527	CAV2|0.417;MCC|2.125	2	455	76	21829	http://www.ebi.ac.uk/QuickGO/GTerm?id=GO:0008285	[]
3	3	cell cycle checkpoint	GO:0000075	0.473	0.566	0	-0.14	6.85695	-11.527	TOP2A|0.53	1	183	76	21829	http://www.ebi.ac.uk/QuickGO/GTerm?id=GO:0000075	[]
4	4	cellular component assembly	GO:0022607	0.474	0.567	4.38	1.89	6.85695	-11.527	RIC3|0.491;CAV2|0.417;CDH2|1.906;SDK2|2.638;KIAA1324|5.521;LPAR3|2.868;SPTBN5|28.402;MZT1|0.461	8	2145	76	21829	http://www.ebi.ac.uk/QuickGO/GTerm?id=GO:0022607	[]
8	7,8	regulation of protein modification by small protein conjugation or removal	GO:1903320	0.475	0.567	0	-0.14	6.85695	-11.527	EGR1|2.376	1	184	76	21829	http://www.ebi.ac.uk/QuickGO/GTerm?id=GO:1903320	[]
6	4,5,6	negative regulation of macromolecule metabolic process	GO:0010605	0.477	0.569	2.12	0.84	6.85695	-11.527	CHAC1|0.521;EGR1|2.376;JUN|2.208;WFDC1|0.417;SIK1|1.694;AEBP1|2.049;DUSP8|1.567	7	1866	76	21829	http://www.ebi.ac.uk/QuickGO/GTerm?id=GO:0010605	[]
4	4	detection of chemical stimulus	GO:0009593	0.477	0.569	0	-0.14	6.85695	-11.527	TRPA1|0.123	1	185	76	21829	http://www.ebi.ac.uk/QuickGO/GTerm?id=GO:0009593	[]
4	4	telencephalon development	GO:0021537	0.479	0.57	0	-0.14	6.85695	-11.527	CDH2|1.906	1	186	76	21829	http://www.ebi.ac.uk/QuickGO/GTerm?id=GO:0021537	[]
6	5,6	lymphocyte proliferation	GO:0046651	0.479	0.57	0	-0.14	6.85695	-11.527	IRS2|1.866	1	186	76	21829	http://www.ebi.ac.uk/QuickGO/GTerm?id=GO:0046651	[]
8	4,5,7,8	positive regulation of secretion by cell	GO:1903532	0.479	0.57	0	-0.14	6.85695	-11.527	IRS2|1.866	1	186	76	21829	http://www.ebi.ac.uk/QuickGO/GTerm?id=GO:1903532	[]
5	5	mononuclear cell proliferation	GO:0032943	0.481	0.571	0	-0.14	6.85695	-11.527	IRS2|1.866	1	187	76	21829	http://www.ebi.ac.uk/QuickGO/GTerm?id=GO:0032943	[]
8	7,8	regulation of protein targeting	GO:1903533	0.481	0.571	0	-0.14	6.85695	-11.527	OSCP1|0.14	1	187	76	21829	http://www.ebi.ac.uk/QuickGO/GTerm?id=GO:1903533	[]
9	7,8,9	regulation of proteasomal protein catabolic process	GO:0061136	0.482	0.573	0	-0.14	6.85695	-11.527	RNF144A|2.045	1	188	76	21829	http://www.ebi.ac.uk/QuickGO/GTerm?id=GO:0061136	[]
10	6,9,10	axon guidance	GO:0007411	0.484	0.574	0	-0.14	6.85695	-11.527	GFRA3|0.646	1	189	76	21829	http://www.ebi.ac.uk/QuickGO/GTerm?id=GO:0007411	[]
5	5	positive regulation of cell projection organization	GO:0031346	0.484	0.574	0	-0.14	6.85695	-11.527	LPAR3|2.868	1	189	76	21829	http://www.ebi.ac.uk/QuickGO/GTerm?id=GO:0031346	[]
5	5	regulation of secretion	GO:0051046	0.485	0.575	1.04	0.34	6.85695	-11.527	CCK1R|5.905;IRS2|1.866	2	466	76	21829	http://www.ebi.ac.uk/QuickGO/GTerm?id=GO:0051046	[]
5	5	neuron death	GO:0070997	0.486	0.575	0	-0.14	6.85695	-11.527	PPARGC1A|0.564	1	190	76	21829	http://www.ebi.ac.uk/QuickGO/GTerm?id=GO:0070997	[]
4	4	negative regulation of nervous system development	GO:0051961	0.486	0.575	0	-0.14	6.85695	-11.527	JAG1|1.703	1	190	76	21829	http://www.ebi.ac.uk/QuickGO/GTerm?id=GO:0051961	[]
5	5	limb development	GO:0060173	0.488	0.577	0	-0.14	6.85695	-11.527	CDH2|1.906	1	191	76	21829	http://www.ebi.ac.uk/QuickGO/GTerm?id=GO:0060173	[]
6	5,6	cellular chemical homeostasis	GO:0055082	0.488	0.577	-0.12	-0.2	6.85695	-11.527	HKDC1|2.366;SGK2|0.559	2	469	76	21829	http://www.ebi.ac.uk/QuickGO/GTerm?id=GO:0055082	[]
8	8	negative regulation of protein kinase activity	GO:0006469	0.49	0.577	0	-0.14	6.85695	-11.527	DUSP8|1.567	1	192	76	21829	http://www.ebi.ac.uk/QuickGO/GTerm?id=GO:0006469	[]
4	4	appendage development	GO:0048736	0.49	0.577	0	-0.14	6.85695	-11.527	CDH2|1.906	1	192	76	21829	http://www.ebi.ac.uk/QuickGO/GTerm?id=GO:0048736	[]
4	4	sex differentiation	GO:0007548	0.49	0.577	0	-0.14	6.85695	-11.527	ADAMTS1|1.877	1	192	76	21829	http://www.ebi.ac.uk/QuickGO/GTerm?id=GO:0007548	[]
6	3,5,6	positive regulation of establishment of protein localization	GO:1904951	0.49	0.577	0	-0.14	6.85695	-11.527	OSCP1|0.14	1	192	76	21829	http://www.ebi.ac.uk/QuickGO/GTerm?id=GO:1904951	[]
6	5,6	epithelial cell development	GO:0002064	0.491	0.579	0	-0.14	6.85695	-11.527	JAG1|1.703	1	193	76	21829	http://www.ebi.ac.uk/QuickGO/GTerm?id=GO:0002064	[]
4	4	leukocyte proliferation	GO:0070661	0.493	0.581	0	-0.14	6.85695	-11.527	IRS2|1.866	1	194	76	21829	http://www.ebi.ac.uk/QuickGO/GTerm?id=GO:0070661	[]
9	5,8,9	neuron projection guidance	GO:0097485	0.495	0.582	0	-0.14	6.85695	-11.527	GFRA3|0.646	1	195	76	21829	http://www.ebi.ac.uk/QuickGO/GTerm?id=GO:0097485	[]
5	5	vesicle localization	GO:0051648	0.495	0.582	0	-0.14	6.85695	-11.527	CDH2|1.906	1	195	76	21829	http://www.ebi.ac.uk/QuickGO/GTerm?id=GO:0051648	[]
3	3	leukocyte activation	GO:0045321	0.499	0.587	0.65	0.16	6.85695	-11.527	EGR1|2.376;IRS2|1.866	2	479	76	21829	http://www.ebi.ac.uk/QuickGO/GTerm?id=GO:0045321	[]
8	8	negative regulation of endopeptidase activity	GO:0010951	0.502	0.59	0	-0.14	6.85695	-11.527	WFDC1|0.417	1	199	76	21829	http://www.ebi.ac.uk/QuickGO/GTerm?id=GO:0010951	[]
6	5,6	negative regulation of nucleobase-containing compound metabolic process	GO:0045934	0.504	0.591	1.26	0.44	6.85695	-11.527	EGR1|2.376;JUN|2.208;SIK1|1.694;AEBP1|2.049	4	1055	76	21829	http://www.ebi.ac.uk/QuickGO/GTerm?id=GO:0045934	[]
6	6	negative regulation of cellular macromolecule biosynthetic process	GO:2000113	0.504	0.591	1.26	0.44	6.85695	-11.527	EGR1|2.376;JUN|2.208;SIK1|1.694;AEBP1|2.049	4	1055	76	21829	http://www.ebi.ac.uk/QuickGO/GTerm?id=GO:2000113	[]
7	4,6,7	positive regulation of secretion	GO:0051047	0.506	0.593	0	-0.14	6.85695	-11.527	IRS2|1.866	1	201	76	21829	http://www.ebi.ac.uk/QuickGO/GTerm?id=GO:0051047	[]
5	5	regulation of organelle organization	GO:0033043	0.507	0.594	-2.22	-1.17	6.85695	-11.527	CAV2|0.417;PPARGC1A|0.564;KIAA1324|5.521;OSCP1|0.14	4	1059	76	21829	http://www.ebi.ac.uk/QuickGO/GTerm?id=GO:0033043	[]
6	5,6	stress-activated protein kinase signaling cascade	GO:0031098	0.507	0.594	0	-0.14	6.85695	-11.527	ANKRD6|0.513	1	202	76	21829	http://www.ebi.ac.uk/QuickGO/GTerm?id=GO:0031098	[]
7	5,6,7	regulation of protein transport	GO:0051223	0.508	0.594	0.58	0.13	6.85695	-11.527	OSCP1|0.14;IRS2|1.866	2	487	76	21829	http://www.ebi.ac.uk/QuickGO/GTerm?id=GO:0051223	[]
8	7,8	regulation of proteolysis involved in cellular protein catabolic process	GO:1903050	0.509	0.594	0	-0.14	6.85695	-11.527	RNF144A|2.045	1	203	76	21829	http://www.ebi.ac.uk/QuickGO/GTerm?id=GO:1903050	[]
10	6,7,8,10	positive regulation of neuron differentiation	GO:0045666	0.509	0.594	0	-0.14	6.85695	-11.527	LPAR3|2.868	1	203	76	21829	http://www.ebi.ac.uk/QuickGO/GTerm?id=GO:0045666	[]
5	5	ear development	GO:0043583	0.509	0.594	0	-0.14	6.85695	-11.527	JAG1|1.703	1	203	76	21829	http://www.ebi.ac.uk/QuickGO/GTerm?id=GO:0043583	[]
6	5,6	establishment of protein localization to membrane	GO:0090150	0.511	0.596	0	-0.14	6.85695	-11.527	CDH2|1.906	1	204	76	21829	http://www.ebi.ac.uk/QuickGO/GTerm?id=GO:0090150	[]
6	5,6	mesenchyme development	GO:0060485	0.512	0.598	0	-0.14	6.85695	-11.527	JAG1|1.703	1	205	76	21829	http://www.ebi.ac.uk/QuickGO/GTerm?id=GO:0060485	[]
7	7	negative regulation of peptidase activity	GO:0010466	0.514	0.599	0	-0.14	6.85695	-11.527	WFDC1|0.417	1	206	76	21829	http://www.ebi.ac.uk/QuickGO/GTerm?id=GO:0010466	[]
4	4	detection of stimulus involved in sensory perception	GO:0050906	0.516	0.6	0	-0.14	6.85695	-11.527	TRPA1|0.123	1	207	76	21829	http://www.ebi.ac.uk/QuickGO/GTerm?id=GO:0050906	[]
7	6,7	cellular response to steroid hormone stimulus	GO:0071383	0.516	0.6	0	-0.14	6.85695	-11.527	RARA|1.526	1	207	76	21829	http://www.ebi.ac.uk/QuickGO/GTerm?id=GO:0071383	[]
4	3,4	regulation of multi-organism process	GO:0043900	0.518	0.602	0	-0.14	6.85695	-11.527	JUN|2.208	1	208	76	21829	http://www.ebi.ac.uk/QuickGO/GTerm?id=GO:0043900	[]
5	5	homeostasis of number of cells	GO:0048872	0.518	0.602	0	-0.14	6.85695	-11.527	CDH2|1.906	1	208	76	21829	http://www.ebi.ac.uk/QuickGO/GTerm?id=GO:0048872	[]
2	2	multi-organism process	GO:0051704	0.519	0.602	1.23	0.43	6.85695	-11.527	CAV2|0.417;ADAMTS1|1.877;MST1R|1.705;JUN|2.208	4	1075	76	21829	http://www.ebi.ac.uk/QuickGO/GTerm?id=GO:0051704	[]
6	5,6	cell morphogenesis	GO:0000902	0.519	0.602	1.66	0.63	6.85695	-11.527	LRFN5|1.736;GFRA3|0.646;CCK1R|5.905;LPAR3|2.868	4	1075	76	21829	http://www.ebi.ac.uk/QuickGO/GTerm?id=GO:0000902	[]
8	8	peptidyl-tyrosine dephosphorylation	GO:0035335	0.519	0.602	0	-0.14	6.85695	-11.527	DUSP8|1.567	1	209	76	21829	http://www.ebi.ac.uk/QuickGO/GTerm?id=GO:0035335	[]
5	4,5	intracellular receptor signaling pathway	GO:0030522	0.521	0.604	0	-0.14	6.85695	-11.527	RARA|1.526	1	210	76	21829	http://www.ebi.ac.uk/QuickGO/GTerm?id=GO:0030522	[]
6	5,6	intrinsic apoptotic signaling pathway	GO:0097193	0.523	0.606	0	-0.14	6.85695	-11.527	CHAC1|0.521	1	211	76	21829	http://www.ebi.ac.uk/QuickGO/GTerm?id=GO:0097193	[]
7	6,7	proton transport	GO:0015992	0.524	0.607	0	-0.14	6.85695	-11.527	COX7C|0.658	1	212	76	21829	http://www.ebi.ac.uk/QuickGO/GTerm?id=GO:0015992	[]
5	5	protein complex subunit organization	GO:0071822	0.525	0.608	-2.7	-1.39	6.85695	-11.527	RIC3|0.491;CAV2|0.417;FAT1|0.605;SPTBN5|28.402;MZT1|0.461	5	1373	76	21829	http://www.ebi.ac.uk/QuickGO/GTerm?id=GO:0071822	[]
6	5,6	hydrogen transport	GO:0006818	0.526	0.608	0	-0.14	6.85695	-11.527	COX7C|0.658	1	213	76	21829	http://www.ebi.ac.uk/QuickGO/GTerm?id=GO:0006818	[]
4	4	negative regulation of cell differentiation	GO:0045596	0.527	0.609	0.51	0.1	6.85695	-11.527	CDH2|1.906;JAG1|1.703	2	504	76	21829	http://www.ebi.ac.uk/QuickGO/GTerm?id=GO:0045596	[]
3	3	nitrogen compound metabolic process	GO:0006807	0.527	0.609	-0.71	-0.47	6.85695	-11.527	NIM1K|1.617;CERS6|0.346;CDH2|1.906;CTSK|2.109;CDO1|0.672;SLC25A25|0.627;CRCP|0.599;MST1R|1.705;CHAC1|0.521;ENPP2|0.6;CYR61|2.231;PANK1|0.639;EGR1|2.376;JUN|2.208;PPARGC1A|0.564;TOP2A|0.53;RARA|1.526;FOS|3.316;WFDC1|0.417;HKDC1|2.366;MAOA|0.614;LAP3|0.573;SIK1|1.694;CHRDL1|0.429;SGK2|0.559;PIPOX|1.809;KL|3.059;RNF144A|2.045;LPAR3|2.868;SLC6A14|0.423;COX7C|0.658;AEBP1|2.049;ANKRD6|0.513;DUSP8|1.567…	36	10285	76	21829	http://www.ebi.ac.uk/QuickGO/GTerm?id=GO:0006807	[]
4	4	response to wounding	GO:0009611	0.531	0.612	0.03	-0.13	6.85695	-11.527	CYR61|2.231;WFDC1|0.417	2	508	76	21829	http://www.ebi.ac.uk/QuickGO/GTerm?id=GO:0009611	[]
5	5	response to light stimulus	GO:0009416	0.531	0.612	0	-0.14	6.85695	-11.527	SIK1|1.694	1	216	76	21829	http://www.ebi.ac.uk/QuickGO/GTerm?id=GO:0009416	[]
6	6	sensory perception of chemical stimulus	GO:0007606	0.531	0.612	0	-0.14	6.85695	-11.527	TRPA1|0.123	1	216	76	21829	http://www.ebi.ac.uk/QuickGO/GTerm?id=GO:0007606	[]
3	3	macromolecule localization	GO:0033036	0.532	0.613	0.1	-0.09	6.85695	-11.527	SIDT1|5.384;RIC3|0.491;CDH2|1.906;ACSL1|0.614;OSCP1|0.14;IRS2|1.866;MZT1|0.461;MCC|2.125	8	2254	76	21829	http://www.ebi.ac.uk/QuickGO/GTerm?id=GO:0033036	[]
6	5,6	negative regulation of macromolecule biosynthetic process	GO:0010558	0.533	0.613	1.26	0.44	6.85695	-11.527	EGR1|2.376;JUN|2.208;SIK1|1.694;AEBP1|2.049	4	1094	76	21829	http://www.ebi.ac.uk/QuickGO/GTerm?id=GO:0010558	[]
6	5,6	protein complex assembly	GO:0006461	0.534	0.613	-2.48	-1.29	6.85695	-11.527	RIC3|0.491;CAV2|0.417;SPTBN5|28.402;MZT1|0.461	4	1095	76	21829	http://www.ebi.ac.uk/QuickGO/GTerm?id=GO:0006461	[]
4	4	protein complex biogenesis	GO:0070271	0.534	0.613	-2.48	-1.29	6.85695	-11.527	RIC3|0.491;CAV2|0.417;SPTBN5|28.402;MZT1|0.461	4	1095	76	21829	http://www.ebi.ac.uk/QuickGO/GTerm?id=GO:0070271	[]
5	5	negative regulation of cell development	GO:0010721	0.534	0.613	0	-0.14	6.85695	-11.527	JAG1|1.703	1	218	76	21829	http://www.ebi.ac.uk/QuickGO/GTerm?id=GO:0010721	[]
6	4,5,6	immune response-activating signal transduction	GO:0002757	0.534	0.613	0	-0.14	6.85695	-11.527	JUN|2.208	1	218	76	21829	http://www.ebi.ac.uk/QuickGO/GTerm?id=GO:0002757	[]
6	4,5,6	positive regulation of intracellular transport	GO:0032388	0.536	0.615	0	-0.14	6.85695	-11.527	OSCP1|0.14	1	219	76	21829	http://www.ebi.ac.uk/QuickGO/GTerm?id=GO:0032388	[]
7	6,7	regulation of cellular protein catabolic process	GO:1903362	0.538	0.616	0	-0.14	6.85695	-11.527	RNF144A|2.045	1	220	76	21829	http://www.ebi.ac.uk/QuickGO/GTerm?id=GO:1903362	[]
6	5,6	negative regulation of cellular protein metabolic process	GO:0032269	0.54	0.619	-0.2	-0.23	6.85695	-11.527	CHAC1|0.521;WFDC1|0.417;DUSP8|1.567	3	811	76	21829	http://www.ebi.ac.uk/QuickGO/GTerm?id=GO:0032269	[]
7	6,7	DNA recombination	GO:0006310	0.541	0.619	0	-0.14	6.85695	-11.527	TOP2A|0.53	1	222	76	21829	http://www.ebi.ac.uk/QuickGO/GTerm?id=GO:0006310	[]
8	8	peptidyl-serine phosphorylation	GO:0018105	0.541	0.619	0	-0.14	6.85695	-11.527	SGK2|0.559	1	222	76	21829	http://www.ebi.ac.uk/QuickGO/GTerm?id=GO:0018105	[]
6	6	protein processing	GO:0016485	0.542	0.62	0	-0.14	6.85695	-11.527	CHAC1|0.521	1	223	76	21829	http://www.ebi.ac.uk/QuickGO/GTerm?id=GO:0016485	[]
5	4,5	regulation of cellular response to stress	GO:0080135	0.543	0.62	-0.45	-0.35	6.85695	-11.527	KIAA1324|5.521;ANKRD6|0.513	2	519	76	21829	http://www.ebi.ac.uk/QuickGO/GTerm?id=GO:0080135	[]
8	7,8	protein homooligomerization	GO:0051260	0.546	0.623	0	-0.14	6.85695	-11.527	SPTBN5|28.402	1	225	76	21829	http://www.ebi.ac.uk/QuickGO/GTerm?id=GO:0051260	[]
6	4,6	reproductive structure development	GO:0048608	0.546	0.623	0	-0.14	6.85695	-11.527	ADAMTS1|1.877	1	225	76	21829	http://www.ebi.ac.uk/QuickGO/GTerm?id=GO:0048608	[]
5	4,5	positive regulation of cytokine production	GO:0001819	0.546	0.623	0	-0.14	6.85695	-11.527	AGPAT2|1.693	1	225	76	21829	http://www.ebi.ac.uk/QuickGO/GTerm?id=GO:0001819	[]
5	4,5	immune response-regulating signaling pathway	GO:0002764	0.549	0.626	0	-0.14	6.85695	-11.527	JUN|2.208	1	227	76	21829	http://www.ebi.ac.uk/QuickGO/GTerm?id=GO:0002764	[]
5	5	reproductive system development	GO:0061458	0.55	0.626	0	-0.14	6.85695	-11.527	ADAMTS1|1.877	1	228	76	21829	http://www.ebi.ac.uk/QuickGO/GTerm?id=GO:0061458	[]
5	5	lymphocyte differentiation	GO:0030098	0.55	0.626	0	-0.14	6.85695	-11.527	EGR1|2.376	1	228	76	21829	http://www.ebi.ac.uk/QuickGO/GTerm?id=GO:0030098	[]
5	5	nitrogen compound transport	GO:0071705	0.55	0.626	-1	-0.61	6.85695	-11.527	SIDT1|5.384;SLC25A25|0.627;OSCP1|0.14;IRS2|1.866;SLC6A14|0.423	5	1412	76	21829	http://www.ebi.ac.uk/QuickGO/GTerm?id=GO:0071705	[]
6	5,6	regulation of establishment of protein localization	GO:0070201	0.553	0.629	0.58	0.13	6.85695	-11.527	OSCP1|0.14;IRS2|1.866	2	529	76	21829	http://www.ebi.ac.uk/QuickGO/GTerm?id=GO:0070201	[]
3	3	positive regulation of cellular protein localization	GO:1903829	0.554	0.629	0	-0.14	6.85695	-11.527	OSCP1|0.14	1	230	76	21829	http://www.ebi.ac.uk/QuickGO/GTerm?id=GO:1903829	[]
7	6,7	cellular protein complex assembly	GO:0043623	0.558	0.633	-0.65	-0.44	6.85695	-11.527	RIC3|0.491;MZT1|0.461	2	534	76	21829	http://www.ebi.ac.uk/QuickGO/GTerm?id=GO:0043623	[]
6	6	macroautophagy	GO:0016236	0.558	0.633	0	-0.14	6.85695	-11.527	KIAA1324|5.521	1	233	76	21829	http://www.ebi.ac.uk/QuickGO/GTerm?id=GO:0016236	[]
4	4	regulation of developmental growth	GO:0048638	0.558	0.633	0	-0.14	6.85695	-11.527	LPAR3|2.868	1	233	76	21829	http://www.ebi.ac.uk/QuickGO/GTerm?id=GO:0048638	[]
3	3	immune response	GO:0006955	0.563	0.638	0.22	-0.04	6.85695	-11.527	ENPP2|0.6;JUN|2.208;JAG1|1.703	3	838	76	21829	http://www.ebi.ac.uk/QuickGO/GTerm?id=GO:0006955	[]
8	8	peptidyl-serine modification	GO:0018209	0.563	0.638	0	-0.14	6.85695	-11.527	SGK2|0.559	1	236	76	21829	http://www.ebi.ac.uk/QuickGO/GTerm?id=GO:0018209	[]
10	6,7,8,9,10	regulation of protein secretion	GO:0050708	0.564	0.639	0	-0.14	6.85695	-11.527	IRS2|1.866	1	237	76	21829	http://www.ebi.ac.uk/QuickGO/GTerm?id=GO:0050708	[]
4	4	T cell aggregation	GO:0070489	0.566	0.641	0	-0.14	6.85695	-11.527	EGR1|2.376	1	238	76	21829	http://www.ebi.ac.uk/QuickGO/GTerm?id=GO:0070489	[]
6	6	regulation of cell morphogenesis involved in differentiation	GO:0010769	0.567	0.642	0	-0.14	6.85695	-11.527	LPAR3|2.868	1	239	76	21829	http://www.ebi.ac.uk/QuickGO/GTerm?id=GO:0010769	[]
8	7,8	lymphocyte aggregation	GO:0071593	0.569	0.643	0	-0.14	6.85695	-11.527	EGR1|2.376	1	240	76	21829	http://www.ebi.ac.uk/QuickGO/GTerm?id=GO:0071593	[]
6	6	regulation of autophagy	GO:0010506	0.571	0.644	0	-0.14	6.85695	-11.527	KIAA1324|5.521	1	241	76	21829	http://www.ebi.ac.uk/QuickGO/GTerm?id=GO:0010506	[]
5	4,5	regulation of cell division	GO:0051302	0.571	0.644	0	-0.14	6.85695	-11.527	CAV2|0.417	1	241	76	21829	http://www.ebi.ac.uk/QuickGO/GTerm?id=GO:0051302	[]
5	5	protein maturation	GO:0051604	0.574	0.647	0	-0.14	6.85695	-11.527	CHAC1|0.521	1	243	76	21829	http://www.ebi.ac.uk/QuickGO/GTerm?id=GO:0051604	[]
6	6	nucleic acid phosphodiester bond hydrolysis	GO:0090305	0.574	0.647	0	-0.14	6.85695	-11.527	ENPP2|0.6	1	243	76	21829	http://www.ebi.ac.uk/QuickGO/GTerm?id=GO:0090305	[]
5	5	negative regulation of cellular biosynthetic process	GO:0031327	0.576	0.649	1.26	0.44	6.85695	-11.527	EGR1|2.376;JUN|2.208;SIK1|1.694;AEBP1|2.049	4	1155	76	21829	http://www.ebi.ac.uk/QuickGO/GTerm?id=GO:0031327	[]
7	5,6,7	regulation of lymphocyte activation	GO:0051249	0.577	0.649	0	-0.14	6.85695	-11.527	IRS2|1.866	1	245	76	21829	http://www.ebi.ac.uk/QuickGO/GTerm?id=GO:0051249	[]
7	6,7	leukocyte aggregation	GO:0070486	0.578	0.65	0	-0.14	6.85695	-11.527	EGR1|2.376	1	246	76	21829	http://www.ebi.ac.uk/QuickGO/GTerm?id=GO:0070486	[]
5	4,5	regulation of cell-cell adhesion	GO:0022407	0.578	0.65	0	-0.14	6.85695	-11.527	CDH2|1.906	1	246	76	21829	http://www.ebi.ac.uk/QuickGO/GTerm?id=GO:0022407	[]
5	5	negative regulation of protein metabolic process	GO:0051248	0.579	0.651	-0.2	-0.23	6.85695	-11.527	CHAC1|0.521;WFDC1|0.417;DUSP8|1.567	3	858	76	21829	http://www.ebi.ac.uk/QuickGO/GTerm?id=GO:0051248	[]
7	5,6,7	regulation of DNA metabolic process	GO:0051052	0.581	0.653	0	-0.14	6.85695	-11.527	PPARGC1A|0.564	1	248	76	21829	http://www.ebi.ac.uk/QuickGO/GTerm?id=GO:0051052	[]
5	4,5	cellular component morphogenesis	GO:0032989	0.581	0.653	1.66	0.63	6.85695	-11.527	LRFN5|1.736;GFRA3|0.646;CCK1R|5.905;LPAR3|2.868	4	1162	76	21829	http://www.ebi.ac.uk/QuickGO/GTerm?id=GO:0032989	[]
4	4	negative regulation of biosynthetic process	GO:0009890	0.583	0.654	1.26	0.44	6.85695	-11.527	EGR1|2.376;JUN|2.208;SIK1|1.694;AEBP1|2.049	4	1165	76	21829	http://www.ebi.ac.uk/QuickGO/GTerm?id=GO:0009890	[]
5	5	organelle assembly	GO:0070925	0.584	0.655	-0.41	-0.33	6.85695	-11.527	KIAA1324|5.521;MZT1|0.461	2	560	76	21829	http://www.ebi.ac.uk/QuickGO/GTerm?id=GO:0070925	[]
7	6,7	regulation of intracellular protein transport	GO:0033157	0.587	0.657	0	-0.14	6.85695	-11.527	OSCP1|0.14	1	252	76	21829	http://www.ebi.ac.uk/QuickGO/GTerm?id=GO:0033157	[]
4	3,4	positive regulation of cell adhesion	GO:0045785	0.587	0.657	0	-0.14	6.85695	-11.527	CYR61|2.231	1	252	76	21829	http://www.ebi.ac.uk/QuickGO/GTerm?id=GO:0045785	[]
4	4	negative regulation of nitrogen compound metabolic process	GO:0051172	0.588	0.658	1.26	0.44	6.85695	-11.527	EGR1|2.376;JUN|2.208;SIK1|1.694;AEBP1|2.049	4	1172	76	21829	http://www.ebi.ac.uk/QuickGO/GTerm?id=GO:0051172	[]
5	5	vesicle organization	GO:0016050	0.588	0.658	0	-0.14	6.85695	-11.527	CAV2|0.417	1	253	76	21829	http://www.ebi.ac.uk/QuickGO/GTerm?id=GO:0016050	[]
9	9	calcium ion homeostasis	GO:0055074	0.593	0.662	0	-0.14	6.85695	-11.527	KL|3.059	1	256	76	21829	http://www.ebi.ac.uk/QuickGO/GTerm?id=GO:0055074	[]
5	5	ameboidal-type cell migration	GO:0001667	0.594	0.662	0	-0.14	6.85695	-11.527	MCC|2.125	1	257	76	21829	http://www.ebi.ac.uk/QuickGO/GTerm?id=GO:0001667	[]
3	3	protein folding	GO:0006457	0.594	0.662	0	-0.14	6.85695	-11.527	RIC3|0.491	1	257	76	21829	http://www.ebi.ac.uk/QuickGO/GTerm?id=GO:0006457	[]
4	4	cell-substrate adhesion	GO:0031589	0.594	0.662	0	-0.14	6.85695	-11.527	CYR61|2.231	1	257	76	21829	http://www.ebi.ac.uk/QuickGO/GTerm?id=GO:0031589	[]
9	5,6,7,9	positive regulation of neurogenesis	GO:0050769	0.594	0.662	0	-0.14	6.85695	-11.527	LPAR3|2.868	1	257	76	21829	http://www.ebi.ac.uk/QuickGO/GTerm?id=GO:0050769	[]
4	4	cell activation	GO:0001775	0.599	0.667	0.65	0.16	6.85695	-11.527	EGR1|2.376;IRS2|1.866	2	575	76	21829	http://www.ebi.ac.uk/QuickGO/GTerm?id=GO:0001775	[]
5	5	response to steroid hormone	GO:0048545	0.603	0.671	0	-0.14	6.85695	-11.527	RARA|1.526	1	263	76	21829	http://www.ebi.ac.uk/QuickGO/GTerm?id=GO:0048545	[]
3	3	activation of immune response	GO:0002253	0.607	0.675	0	-0.14	6.85695	-11.527	JUN|2.208	1	266	76	21829	http://www.ebi.ac.uk/QuickGO/GTerm?id=GO:0002253	[]
8	8	potassium ion transport	GO:0006813	0.61	0.678	0	-0.14	6.85695	-11.527	ATP1A1|1.604	1	268	76	21829	http://www.ebi.ac.uk/QuickGO/GTerm?id=GO:0006813	[]
8	7,8	protein polymerization	GO:0051258	0.615	0.684	0	-0.14	6.85695	-11.527	MZT1|0.461	1	272	76	21829	http://www.ebi.ac.uk/QuickGO/GTerm?id=GO:0051258	[]
6	6	regulation of cytoplasmic transport	GO:1903649	0.62	0.689	0	-0.14	6.85695	-11.527	OSCP1|0.14	1	276	76	21829	http://www.ebi.ac.uk/QuickGO/GTerm?id=GO:1903649	[]
7	5,6,7	epithelial tube morphogenesis	GO:0060562	0.623	0.692	0	-0.14	6.85695	-11.527	CDH2|1.906	1	278	76	21829	http://www.ebi.ac.uk/QuickGO/GTerm?id=GO:0060562	[]
6	4,5,6	regulation of leukocyte activation	GO:0002694	0.627	0.696	0	-0.14	6.85695	-11.527	IRS2|1.866	1	281	76	21829	http://www.ebi.ac.uk/QuickGO/GTerm?id=GO:0002694	[]
10	7,8,10	regulation of neuron projection development	GO:0010975	0.628	0.696	0	-0.14	6.85695	-11.527	LPAR3|2.868	1	282	76	21829	http://www.ebi.ac.uk/QuickGO/GTerm?id=GO:0010975	[]
6	5,6	regulation of apoptotic signaling pathway	GO:2001233	0.628	0.696	0	-0.14	6.85695	-11.527	KIAA1324|5.521	1	282	76	21829	http://www.ebi.ac.uk/QuickGO/GTerm?id=GO:2001233	[]
8	6,7,8	peptide secretion	GO:0002790	0.628	0.696	0	-0.14	6.85695	-11.527	IRS2|1.866	1	282	76	21829	http://www.ebi.ac.uk/QuickGO/GTerm?id=GO:0002790	[]
8	8	divalent inorganic cation homeostasis	GO:0072507	0.631	0.698	0	-0.14	6.85695	-11.527	KL|3.059	1	284	76	21829	http://www.ebi.ac.uk/QuickGO/GTerm?id=GO:0072507	[]
5	5	regulation of response to wounding	GO:1903034	0.635	0.702	0	-0.14	6.85695	-11.527	WFDC1|0.417	1	287	76	21829	http://www.ebi.ac.uk/QuickGO/GTerm?id=GO:1903034	[]
3	3	detection of stimulus	GO:0051606	0.636	0.703	0	-0.14	6.85695	-11.527	TRPA1|0.123	1	288	76	21829	http://www.ebi.ac.uk/QuickGO/GTerm?id=GO:0051606	[]
5	5	aromatic compound catabolic process	GO:0019439	0.637	0.704	0	-0.14	6.85695	-11.527	MAOA|0.614	1	289	76	21829	http://www.ebi.ac.uk/QuickGO/GTerm?id=GO:0019439	[]
5	4,5	cellular homeostasis	GO:0019725	0.64	0.706	-0.12	-0.2	6.85695	-11.527	HKDC1|2.366;SGK2|0.559	2	620	76	21829	http://www.ebi.ac.uk/QuickGO/GTerm?id=GO:0019725	[]
6	5,6	leukocyte cell-cell adhesion	GO:0007159	0.64	0.706	0	-0.14	6.85695	-11.527	EGR1|2.376	1	291	76	21829	http://www.ebi.ac.uk/QuickGO/GTerm?id=GO:0007159	[]
5	5	T cell activation	GO:0042110	0.641	0.707	0	-0.14	6.85695	-11.527	EGR1|2.376	1	292	76	21829	http://www.ebi.ac.uk/QuickGO/GTerm?id=GO:0042110	[]
6	6	transcription, DNA-templated	GO:0006351	0.645	0.71	3.38	1.43	6.85695	-11.527	CRCP|0.599;CYR61|2.231;EGR1|2.376;JUN|2.208;PPARGC1A|0.564;RARA|1.526;FOS|3.316;SIK1|1.694;CHRDL1|0.429;AEBP1|2.049;JAG1|1.703	11	3380	76	21829	http://www.ebi.ac.uk/QuickGO/GTerm?id=GO:0006351	[]
3	3	negative regulation of transport	GO:0051051	0.645	0.71	0	-0.14	6.85695	-11.527	IRS2|1.866	1	295	76	21829	http://www.ebi.ac.uk/QuickGO/GTerm?id=GO:0051051	[]
6	6	carboxylic acid biosynthetic process	GO:0046394	0.649	0.714	0	-0.14	6.85695	-11.527	PDK4|0.421	1	298	76	21829	http://www.ebi.ac.uk/QuickGO/GTerm?id=GO:0046394	[]
5	5	organic acid biosynthetic process	GO:0016053	0.649	0.714	0	-0.14	6.85695	-11.527	PDK4|0.421	1	298	76	21829	http://www.ebi.ac.uk/QuickGO/GTerm?id=GO:0016053	[]
4	4	cell projection organization	GO:0030030	0.651	0.716	0.19	-0.05	6.85695	-11.527	GFRA3|0.646;CCK1R|5.905;LPAR3|2.868	3	954	76	21829	http://www.ebi.ac.uk/QuickGO/GTerm?id=GO:0030030	[]
5	5	cell projection assembly	GO:0030031	0.655	0.72	0	-0.14	6.85695	-11.527	LPAR3|2.868	1	303	76	21829	http://www.ebi.ac.uk/QuickGO/GTerm?id=GO:0030031	[]
5	5	organic cyclic compound catabolic process	GO:1901361	0.659	0.723	0	-0.14	6.85695	-11.527	MAOA|0.614	1	306	76	21829	http://www.ebi.ac.uk/QuickGO/GTerm?id=GO:1901361	[]
5	4,5	regulation of cell activation	GO:0050865	0.659	0.723	0	-0.14	6.85695	-11.527	IRS2|1.866	1	306	76	21829	http://www.ebi.ac.uk/QuickGO/GTerm?id=GO:0050865	[]
6	6	negative regulation of hydrolase activity	GO:0051346	0.66	0.724	0	-0.14	6.85695	-11.527	WFDC1|0.417	1	307	76	21829	http://www.ebi.ac.uk/QuickGO/GTerm?id=GO:0051346	[]
3	3	single organism reproductive process	GO:0044702	0.661	0.725	0	-0.14	6.85695	-11.527	ADAMTS1|1.877;TOP2A|0.53	2	645	76	21829	http://www.ebi.ac.uk/QuickGO/GTerm?id=GO:0044702	[]
3	3	cellular localization	GO:0051641	0.662	0.725	-1.07	-0.64	6.85695	-11.527	RIC3|0.491;CDH2|1.906;SLC25A25|0.627;CCK1R|5.905;OSCP1|0.14;IRS2|1.866;SPTBN5|28.402;MZT1|0.461	8	2519	76	21829	http://www.ebi.ac.uk/QuickGO/GTerm?id=GO:0051641	[]
6	5,6	protein localization to membrane	GO:0072657	0.665	0.728	0	-0.14	6.85695	-11.527	CDH2|1.906	1	311	76	21829	http://www.ebi.ac.uk/QuickGO/GTerm?id=GO:0072657	[]
5	5	regulation of protein catabolic process	GO:0042176	0.667	0.729	0	-0.14	6.85695	-11.527	RNF144A|2.045	1	313	76	21829	http://www.ebi.ac.uk/QuickGO/GTerm?id=GO:0042176	[]
7	6,7	DNA replication	GO:0006260	0.667	0.729	0	-0.14	6.85695	-11.527	TOP2A|0.53	1	313	76	21829	http://www.ebi.ac.uk/QuickGO/GTerm?id=GO:0006260	[]
8	7,8	nucleic acid-templated transcription	GO:0097659	0.667	0.729	3.38	1.43	6.85695	-11.527	CRCP|0.599;CYR61|2.231;EGR1|2.376;JUN|2.208;PPARGC1A|0.564;RARA|1.526;FOS|3.316;SIK1|1.694;CHRDL1|0.429;AEBP1|2.049;JAG1|1.703	11	3436	76	21829	http://www.ebi.ac.uk/QuickGO/GTerm?id=GO:0097659	[]
4	4	tube morphogenesis	GO:0035239	0.67	0.732	0	-0.14	6.85695	-11.527	CDH2|1.906	1	316	76	21829	http://www.ebi.ac.uk/QuickGO/GTerm?id=GO:0035239	[]
4	4	positive regulation of nervous system development	GO:0051962	0.673	0.734	0	-0.14	6.85695	-11.527	LPAR3|2.868	1	318	76	21829	http://www.ebi.ac.uk/QuickGO/GTerm?id=GO:0051962	[]
9	5,6,7,8,9	protein secretion	GO:0009306	0.674	0.734	0	-0.14	6.85695	-11.527	IRS2|1.866	1	319	76	21829	http://www.ebi.ac.uk/QuickGO/GTerm?id=GO:0009306	[]
6	5,6	regulation of cellular amide metabolic process	GO:0034248	0.674	0.734	0	-0.14	6.85695	-11.527	CYR61|2.231	1	319	76	21829	http://www.ebi.ac.uk/QuickGO/GTerm?id=GO:0034248	[]
7	6,7	RNA biosynthetic process	GO:0032774	0.674	0.734	3.38	1.43	6.85695	-11.527	CRCP|0.599;CYR61|2.231;EGR1|2.376;JUN|2.208;PPARGC1A|0.564;RARA|1.526;FOS|3.316;SIK1|1.694;CHRDL1|0.429;AEBP1|2.049;JAG1|1.703	11	3454	76	21829	http://www.ebi.ac.uk/QuickGO/GTerm?id=GO:0032774	[]
8	7,8	negative regulation of protein phosphorylation	GO:0001933	0.675	0.734	0	-0.14	6.85695	-11.527	DUSP8|1.567	1	320	76	21829	http://www.ebi.ac.uk/QuickGO/GTerm?id=GO:0001933	[]
4	4	regulation of cellular component size	GO:0032535	0.675	0.734	0	-0.14	6.85695	-11.527	LPAR3|2.868	1	320	76	21829	http://www.ebi.ac.uk/QuickGO/GTerm?id=GO:0032535	[]
9	8,9	cellular metal ion homeostasis	GO:0006875	0.675	0.734	0	-0.14	6.85695	-11.527	SGK2|0.559	1	320	76	21829	http://www.ebi.ac.uk/QuickGO/GTerm?id=GO:0006875	[]
7	4,6,7	secretion by cell	GO:0032940	0.675	0.734	1.04	0.34	6.85695	-11.527	CCK1R|5.905;IRS2|1.866	2	662	76	21829	http://www.ebi.ac.uk/QuickGO/GTerm?id=GO:0032940	[]
4	4	protein localization	GO:0008104	0.679	0.737	0.62	0.15	6.85695	-11.527	RIC3|0.491;CDH2|1.906;OSCP1|0.14;IRS2|1.866;MZT1|0.461;MCC|2.125	6	1941	76	21829	http://www.ebi.ac.uk/QuickGO/GTerm?id=GO:0008104	[]
6	5,6	homotypic cell-cell adhesion	GO:0034109	0.68	0.738	0	-0.14	6.85695	-11.527	EGR1|2.376	1	324	76	21829	http://www.ebi.ac.uk/QuickGO/GTerm?id=GO:0034109	[]
7	7	chordate embryonic development	GO:0043009	0.681	0.738	0	-0.14	6.85695	-11.527	CDH2|1.906	1	325	76	21829	http://www.ebi.ac.uk/QuickGO/GTerm?id=GO:0043009	[]
8	8	peptidyl-lysine modification	GO:0018205	0.681	0.738	0	-0.14	6.85695	-11.527	EGR1|2.376	1	325	76	21829	http://www.ebi.ac.uk/QuickGO/GTerm?id=GO:0018205	[]
2	2	reproduction	GO:0000003	0.685	0.742	0	-0.14	6.85695	-11.527	ADAMTS1|1.877;TOP2A|0.53	2	674	76	21829	http://www.ebi.ac.uk/QuickGO/GTerm?id=GO:0000003	[]
7	6,7	proteolysis involved in cellular protein catabolic process	GO:0051603	0.69	0.747	0.63	0.15	6.85695	-11.527	CTSK|2.109;RNF144A|2.045	2	680	76	21829	http://www.ebi.ac.uk/QuickGO/GTerm?id=GO:0051603	[]
5	4,5	single-organism membrane organization	GO:0044802	0.694	0.751	0.1	-0.1	6.85695	-11.527	CAV2|0.417;CDH2|1.906	2	685	76	21829	http://www.ebi.ac.uk/QuickGO/GTerm?id=GO:0044802	[]
6	6	embryo development ending in birth or egg hatching	GO:0009792	0.697	0.754	0	-0.14	6.85695	-11.527	CDH2|1.906	1	340	76	21829	http://www.ebi.ac.uk/QuickGO/GTerm?id=GO:0009792	[]
6	6	cellular response to organic cyclic compound	GO:0071407	0.701	0.757	0	-0.14	6.85695	-11.527	RARA|1.526	1	343	76	21829	http://www.ebi.ac.uk/QuickGO/GTerm?id=GO:0071407	[]
6	6	trans-synaptic signaling	GO:0099537	0.702	0.757	0	-0.14	6.85695	-11.527	RIC3|0.491	1	344	76	21829	http://www.ebi.ac.uk/QuickGO/GTerm?id=GO:0099537	[]
6	5,6	positive regulation of cell development	GO:0010720	0.702	0.757	0	-0.14	6.85695	-11.527	LPAR3|2.868	1	344	76	21829	http://www.ebi.ac.uk/QuickGO/GTerm?id=GO:0010720	[]
7	7	anterograde trans-synaptic signaling	GO:0098916	0.702	0.757	0	-0.14	6.85695	-11.527	RIC3|0.491	1	344	76	21829	http://www.ebi.ac.uk/QuickGO/GTerm?id=GO:0098916	[]
4	4	positive regulation of immune response	GO:0050778	0.704	0.758	0	-0.14	6.85695	-11.527	JUN|2.208	1	346	76	21829	http://www.ebi.ac.uk/QuickGO/GTerm?id=GO:0050778	[]
3	3	immune effector process	GO:0002252	0.704	0.758	0	-0.14	6.85695	-11.527	JAG1|1.703	1	346	76	21829	http://www.ebi.ac.uk/QuickGO/GTerm?id=GO:0002252	[]
5	5	autophagy	GO:0006914	0.705	0.759	0	-0.14	6.85695	-11.527	KIAA1324|5.521	1	347	76	21829	http://www.ebi.ac.uk/QuickGO/GTerm?id=GO:0006914	[]
5	4,5	innate immune response	GO:0045087	0.706	0.759	0	-0.14	6.85695	-11.527	JUN|2.208	1	348	76	21829	http://www.ebi.ac.uk/QuickGO/GTerm?id=GO:0045087	[]
2	2	reproductive process	GO:0022414	0.706	0.759	0	-0.14	6.85695	-11.527	ADAMTS1|1.877;TOP2A|0.53	2	701	76	21829	http://www.ebi.ac.uk/QuickGO/GTerm?id=GO:0022414	[]
5	5	synaptic signaling	GO:0099536	0.71	0.763	0	-0.14	6.85695	-11.527	RIC3|0.491	1	352	76	21829	http://www.ebi.ac.uk/QuickGO/GTerm?id=GO:0099536	[]
7	6,7	regulation of transcription, DNA-templated	GO:0006355	0.711	0.763	3.16	1.32	6.85695	-11.527	CYR61|2.231;EGR1|2.376;JUN|2.208;PPARGC1A|0.564;RARA|1.526;FOS|3.316;SIK1|1.694;CHRDL1|0.429;AEBP1|2.049;JAG1|1.703	10	3246	76	21829	http://www.ebi.ac.uk/QuickGO/GTerm?id=GO:0006355	[]
4	4	cellular component disassembly	GO:0022411	0.711	0.763	0	-0.14	6.85695	-11.527	TOP2A|0.53	1	353	76	21829	http://www.ebi.ac.uk/QuickGO/GTerm?id=GO:0022411	[]
6	6	cellular protein catabolic process	GO:0044257	0.712	0.764	0.63	0.15	6.85695	-11.527	CTSK|2.109;RNF144A|2.045	2	709	76	21829	http://www.ebi.ac.uk/QuickGO/GTerm?id=GO:0044257	[]
5	5	regulation of cellular biosynthetic process	GO:0031326	0.713	0.764	3.81	1.62	6.85695	-11.527	CYR61|2.231;EGR1|2.376;JUN|2.208;PPARGC1A|0.564;RARA|1.526;FOS|3.316;SIK1|1.694;CHRDL1|0.429;IRS2|1.866;AEBP1|2.049;JAG1|1.703;PDK4|0.421	12	3859	76	21829	http://www.ebi.ac.uk/QuickGO/GTerm?id=GO:0031326	[]
4	4	gamete generation	GO:0007276	0.718	0.77	0	-0.14	6.85695	-11.527	ADAMTS1|1.877	1	360	76	21829	http://www.ebi.ac.uk/QuickGO/GTerm?id=GO:0007276	[]
5	4,5	regulation of cytokine production	GO:0001817	0.719	0.77	0	-0.14	6.85695	-11.527	AGPAT2|1.693	1	361	76	21829	http://www.ebi.ac.uk/QuickGO/GTerm?id=GO:0001817	[]
5	5	inflammatory response	GO:0006954	0.721	0.772	0	-0.14	6.85695	-11.527	WFDC1|0.417	1	363	76	21829	http://www.ebi.ac.uk/QuickGO/GTerm?id=GO:0006954	[]
4	4	regulation of biosynthetic process	GO:0009889	0.722	0.772	3.81	1.62	6.85695	-11.527	CYR61|2.231;EGR1|2.376;JUN|2.208;PPARGC1A|0.564;RARA|1.526;FOS|3.316;SIK1|1.694;CHRDL1|0.429;IRS2|1.866;AEBP1|2.049;JAG1|1.703;PDK4|0.421	12	3886	76	21829	http://www.ebi.ac.uk/QuickGO/GTerm?id=GO:0009889	[]
10	7,8,9,10	proteasome-mediated ubiquitin-dependent protein catabolic process	GO:0043161	0.722	0.772	0	-0.14	6.85695	-11.527	RNF144A|2.045	1	364	76	21829	http://www.ebi.ac.uk/QuickGO/GTerm?id=GO:0043161	[]
8	8	protein modification by small protein conjugation	GO:0032446	0.723	0.773	0.69	0.18	6.85695	-11.527	EGR1|2.376;RNF144A|2.045	2	725	76	21829	http://www.ebi.ac.uk/QuickGO/GTerm?id=GO:0032446	[]
5	5	macromolecular complex assembly	GO:0065003	0.724	0.773	-2.48	-1.29	6.85695	-11.527	RIC3|0.491;CAV2|0.417;SPTBN5|28.402;MZT1|0.461	4	1395	76	21829	http://www.ebi.ac.uk/QuickGO/GTerm?id=GO:0065003	[]
4	4	negative regulation of cell cycle	GO:0045786	0.726	0.774	0	-0.14	6.85695	-11.527	TOP2A|0.53	1	368	76	21829	http://www.ebi.ac.uk/QuickGO/GTerm?id=GO:0045786	[]
8	8	peptidyl-tyrosine phosphorylation	GO:0018108	0.726	0.774	0	-0.14	6.85695	-11.527	MST1R|1.705	1	368	76	21829	http://www.ebi.ac.uk/QuickGO/GTerm?id=GO:0018108	[]
7	6,7	regulation of ion transmembrane transport	GO:0034765	0.727	0.775	0	-0.14	6.85695	-11.527	IRS2|1.866	1	369	76	21829	http://www.ebi.ac.uk/QuickGO/GTerm?id=GO:0034765	[]
6	6	regulation of cellular macromolecule biosynthetic process	GO:2000112	0.727	0.775	3.43	1.45	6.85695	-11.527	CYR61|2.231;EGR1|2.376;JUN|2.208;PPARGC1A|0.564;RARA|1.526;FOS|3.316;SIK1|1.694;CHRDL1|0.429;IRS2|1.866;AEBP1|2.049;JAG1|1.703	11	3597	76	21829	http://www.ebi.ac.uk/QuickGO/GTerm?id=GO:2000112	[]
7	6,7	actin filament organization	GO:0007015	0.73	0.776	0	-0.14	6.85695	-11.527	FAT1|0.605	1	372	76	21829	http://www.ebi.ac.uk/QuickGO/GTerm?id=GO:0007015	[]
8	8	peptidyl-tyrosine modification	GO:0018212	0.73	0.776	0	-0.14	6.85695	-11.527	MST1R|1.705	1	372	76	21829	http://www.ebi.ac.uk/QuickGO/GTerm?id=GO:0018212	[]
4	4	establishment of localization in cell	GO:0051649	0.73	0.776	3.83	1.63	6.85695	-11.527	CDH2|1.906;SLC25A25|0.627;CCK1R|5.905;OSCP1|0.14;IRS2|1.866;SPTBN5|28.402	6	2050	76	21829	http://www.ebi.ac.uk/QuickGO/GTerm?id=GO:0051649	[]
3	3	developmental process involved in reproduction	GO:0003006	0.731	0.776	0	-0.14	6.85695	-11.527	ADAMTS1|1.877	1	373	76	21829	http://www.ebi.ac.uk/QuickGO/GTerm?id=GO:0003006	[]
8	7,8	cellular cation homeostasis	GO:0030003	0.731	0.776	0	-0.14	6.85695	-11.527	SGK2|0.559	1	373	76	21829	http://www.ebi.ac.uk/QuickGO/GTerm?id=GO:0030003	[]
5	5	cellular protein localization	GO:0034613	0.732	0.777	-1.78	-0.97	6.85695	-11.527	RIC3|0.491;CDH2|1.906;OSCP1|0.14;MZT1|0.461	4	1411	76	21829	http://www.ebi.ac.uk/QuickGO/GTerm?id=GO:0034613	[]
6	5,6	secretion	GO:0046903	0.733	0.778	1.04	0.34	6.85695	-11.527	CCK1R|5.905;IRS2|1.866	2	739	76	21829	http://www.ebi.ac.uk/QuickGO/GTerm?id=GO:0046903	[]
9	7,8,9	regulation of nucleic acid-templated transcription	GO:1903506	0.734	0.778	3.16	1.32	6.85695	-11.527	CYR61|2.231;EGR1|2.376;JUN|2.208;PPARGC1A|0.564;RARA|1.526;FOS|3.316;SIK1|1.694;CHRDL1|0.429;AEBP1|2.049;JAG1|1.703	10	3309	76	21829	http://www.ebi.ac.uk/QuickGO/GTerm?id=GO:1903506	[]
6	6	regulation of RNA biosynthetic process	GO:2001141	0.734	0.778	3.16	1.32	6.85695	-11.527	CYR61|2.231;EGR1|2.376;JUN|2.208;PPARGC1A|0.564;RARA|1.526;FOS|3.316;SIK1|1.694;CHRDL1|0.429;AEBP1|2.049;JAG1|1.703	10	3310	76	21829	http://www.ebi.ac.uk/QuickGO/GTerm?id=GO:2001141	[]
4	4	cellular macromolecule localization	GO:0070727	0.737	0.781	-1.78	-0.97	6.85695	-11.527	RIC3|0.491;CDH2|1.906;OSCP1|0.14;MZT1|0.461	4	1420	76	21829	http://www.ebi.ac.uk/QuickGO/GTerm?id=GO:0070727	[]
5	5	regulation of intracellular transport	GO:0032386	0.737	0.781	0	-0.14	6.85695	-11.527	OSCP1|0.14	1	380	76	21829	http://www.ebi.ac.uk/QuickGO/GTerm?id=GO:0032386	[]
4	4	organelle localization	GO:0051640	0.739	0.782	0	-0.14	6.85695	-11.527	CDH2|1.906	1	382	76	21829	http://www.ebi.ac.uk/QuickGO/GTerm?id=GO:0051640	[]
7	6,7	cellular ion homeostasis	GO:0006873	0.74	0.783	0	-0.14	6.85695	-11.527	SGK2|0.559	1	383	76	21829	http://www.ebi.ac.uk/QuickGO/GTerm?id=GO:0006873	[]
5	5	regulation of transmembrane transport	GO:0034762	0.742	0.784	0	-0.14	6.85695	-11.527	IRS2|1.866	1	385	76	21829	http://www.ebi.ac.uk/QuickGO/GTerm?id=GO:0034762	[]
5	5	regulation of cell projection organization	GO:0031344	0.744	0.785	0	-0.14	6.85695	-11.527	LPAR3|2.868	1	387	76	21829	http://www.ebi.ac.uk/QuickGO/GTerm?id=GO:0031344	[]
4	4	membrane organization	GO:0061024	0.744	0.785	0.1	-0.1	6.85695	-11.527	CAV2|0.417;CDH2|1.906	2	755	76	21829	http://www.ebi.ac.uk/QuickGO/GTerm?id=GO:0061024	[]
8	6,7,8	proteasomal protein catabolic process	GO:0010498	0.745	0.786	0	-0.14	6.85695	-11.527	RNF144A|2.045	1	388	76	21829	http://www.ebi.ac.uk/QuickGO/GTerm?id=GO:0010498	[]
4	4	macromolecule metabolic process	GO:0043170	0.75	0.791	9.88	4.44	6.85695	-11.527	RIC3|0.491;NIM1K|1.617;CAV2|0.417;ADAMTS1|1.877;ADAMTS9|0.583;CDH2|1.906;CTSK|2.109;CRCP|0.599;ACSL1|0.614;MST1R|1.705;CHAC1|0.521;ENPP2|0.6;CYR61|2.231;EGR1|2.376;JUN|2.208;PPARGC1A|0.564;TOP2A|0.53;RARA|1.526;FOS|3.316;WFDC1|0.417;LAP3|0.573;SIK1|1.694;CHRDL1|0.429;SGK2|0.559;IRS2|1.866;KL|3.059;RNF144A|2.045;LPAR3|2.868;AEBP1|2.049;ANKRD6|0.513;DUSP8|1.567;JAG1|1.703;PDK4|0.421	33	10180	76	21829	http://www.ebi.ac.uk/QuickGO/GTerm?id=GO:0043170	[]
7	6,7	Ras protein signal transduction	GO:0007265	0.753	0.793	0	-0.14	6.85695	-11.527	JUN|2.208	1	397	76	21829	http://www.ebi.ac.uk/QuickGO/GTerm?id=GO:0007265	[]
4	4	defense response	GO:0006952	0.756	0.796	0.04	-0.13	6.85695	-11.527	JUN|2.208;WFDC1|0.417	2	773	76	21829	http://www.ebi.ac.uk/QuickGO/GTerm?id=GO:0006952	[]
5	5	nucleobase-containing compound biosynthetic process	GO:0034654	0.756	0.796	3.58	1.52	6.85695	-11.527	CRCP|0.599;CYR61|2.231;PANK1|0.639;EGR1|2.376;JUN|2.208;PPARGC1A|0.564;RARA|1.526;FOS|3.316;SIK1|1.694;CHRDL1|0.429;AEBP1|2.049;JAG1|1.703	12	3988	76	21829	http://www.ebi.ac.uk/QuickGO/GTerm?id=GO:0034654	[]
7	7	peptidyl-amino acid modification	GO:0018193	0.758	0.797	0.25	-0.02	6.85695	-11.527	MST1R|1.705;EGR1|2.376;SGK2|0.559	3	1125	76	21829	http://www.ebi.ac.uk/QuickGO/GTerm?id=GO:0018193	[]
5	5	regulation of cell morphogenesis	GO:0022604	0.76	0.799	0	-0.14	6.85695	-11.527	LPAR3|2.868	1	405	76	21829	http://www.ebi.ac.uk/QuickGO/GTerm?id=GO:0022604	[]
5	5	cellular amide metabolic process	GO:0043603	0.761	0.8	-0.35	-0.3	6.85695	-11.527	CERS6|0.346;CHAC1|0.521;CYR61|2.231	3	1132	76	21829	http://www.ebi.ac.uk/QuickGO/GTerm?id=GO:0043603	[]
4	4	regulation of anatomical structure size	GO:0090066	0.764	0.802	0	-0.14	6.85695	-11.527	LPAR3|2.868	1	410	76	21829	http://www.ebi.ac.uk/QuickGO/GTerm?id=GO:0090066	[]
6	5,6	regulation of macromolecule biosynthetic process	GO:0010556	0.767	0.805	3.43	1.45	6.85695	-11.527	CYR61|2.231;EGR1|2.376;JUN|2.208;PPARGC1A|0.564;RARA|1.526;FOS|3.316;SIK1|1.694;CHRDL1|0.429;IRS2|1.866;AEBP1|2.049;JAG1|1.703	11	3715	76	21829	http://www.ebi.ac.uk/QuickGO/GTerm?id=GO:0010556	[]
4	4	cytokine production	GO:0001816	0.767	0.805	0	-0.14	6.85695	-11.527	AGPAT2|1.693	1	414	76	21829	http://www.ebi.ac.uk/QuickGO/GTerm?id=GO:0001816	[]
7	5,6,7	establishment of protein localization to organelle	GO:0072594	0.77	0.807	0	-0.14	6.85695	-11.527	OSCP1|0.14	1	417	76	21829	http://www.ebi.ac.uk/QuickGO/GTerm?id=GO:0072594	[]
7	5,6,7	regulation of RNA metabolic process	GO:0051252	0.772	0.808	3.16	1.32	6.85695	-11.527	CYR61|2.231;EGR1|2.376;JUN|2.208;PPARGC1A|0.564;RARA|1.526;FOS|3.316;SIK1|1.694;CHRDL1|0.429;AEBP1|2.049;JAG1|1.703	10	3420	76	21829	http://www.ebi.ac.uk/QuickGO/GTerm?id=GO:0051252	[]
3	3	multicellular organismal reproductive process	GO:0048609	0.772	0.808	0	-0.14	6.85695	-11.527	ADAMTS1|1.877	1	420	76	21829	http://www.ebi.ac.uk/QuickGO/GTerm?id=GO:0048609	[]
4	4	regulation of immune response	GO:0050776	0.774	0.81	0	-0.14	6.85695	-11.527	JUN|2.208	1	422	76	21829	http://www.ebi.ac.uk/QuickGO/GTerm?id=GO:0050776	[]
5	4,5	establishment of protein localization	GO:0045184	0.775	0.81	1.73	0.66	6.85695	-11.527	CDH2|1.906;OSCP1|0.14;IRS2|1.866;MCC|2.125	4	1499	76	21829	http://www.ebi.ac.uk/QuickGO/GTerm?id=GO:0045184	[]
5	5	carbohydrate derivative biosynthetic process	GO:1901137	0.777	0.812	-0.44	-0.35	6.85695	-11.527	PANK1|0.639;PPARGC1A|0.564	2	807	76	21829	http://www.ebi.ac.uk/QuickGO/GTerm?id=GO:1901137	[]
3	3	multicellular organism reproduction	GO:0032504	0.779	0.813	0	-0.14	6.85695	-11.527	ADAMTS1|1.877	1	428	76	21829	http://www.ebi.ac.uk/QuickGO/GTerm?id=GO:0032504	[]
4	4	single-organism cellular localization	GO:1902580	0.779	0.813	0.57	0.12	6.85695	-11.527	CDH2|1.906;OSCP1|0.14	2	810	76	21829	http://www.ebi.ac.uk/QuickGO/GTerm?id=GO:1902580	[]
7	7	protein dephosphorylation	GO:0006470	0.78	0.814	0	-0.14	6.85695	-11.527	DUSP8|1.567	1	430	76	21829	http://www.ebi.ac.uk/QuickGO/GTerm?id=GO:0006470	[]
5	3,5	response to other organism	GO:0051707	0.781	0.814	0	-0.14	6.85695	-11.527	MST1R|1.705	1	431	76	21829	http://www.ebi.ac.uk/QuickGO/GTerm?id=GO:0051707	[]
4	4	response to external biotic stimulus	GO:0043207	0.782	0.815	0	-0.14	6.85695	-11.527	MST1R|1.705	1	432	76	21829	http://www.ebi.ac.uk/QuickGO/GTerm?id=GO:0043207	[]
5	5	protein catabolic process	GO:0030163	0.785	0.818	0.63	0.15	6.85695	-11.527	CTSK|2.109;RNF144A|2.045	2	821	76	21829	http://www.ebi.ac.uk/QuickGO/GTerm?id=GO:0030163	[]
5	5	aromatic compound biosynthetic process	GO:0019438	0.788	0.821	3.58	1.52	6.85695	-11.527	CRCP|0.599;CYR61|2.231;PANK1|0.639;EGR1|2.376;JUN|2.208;PPARGC1A|0.564;RARA|1.526;FOS|3.316;SIK1|1.694;CHRDL1|0.429;AEBP1|2.049;JAG1|1.703	12	4095	76	21829	http://www.ebi.ac.uk/QuickGO/GTerm?id=GO:0019438	[]
6	6	positive regulation of hydrolase activity	GO:0051345	0.79	0.822	0.03	-0.13	6.85695	-11.527	CAV2|0.417;CYR61|2.231	2	830	76	21829	http://www.ebi.ac.uk/QuickGO/GTerm?id=GO:0051345	[]
4	4	cellular aromatic compound metabolic process	GO:0006725	0.791	0.823	-0.79	-0.51	6.85695	-11.527	SLC25A25|0.627;CRCP|0.599;ENPP2|0.6;CYR61|2.231;PANK1|0.639;EGR1|2.376;JUN|2.208;PPARGC1A|0.564;TOP2A|0.53;RARA|1.526;FOS|3.316;HKDC1|2.366;MAOA|0.614;SIK1|1.694;CHRDL1|0.429;COX7C|0.658;AEBP1|2.049;JAG1|1.703	18	5935	76	21829	http://www.ebi.ac.uk/QuickGO/GTerm?id=GO:0006725	[]
5	5	heterocycle biosynthetic process	GO:0018130	0.793	0.824	3.58	1.52	6.85695	-11.527	CRCP|0.599;CYR61|2.231;PANK1|0.639;EGR1|2.376;JUN|2.208;PPARGC1A|0.564;RARA|1.526;FOS|3.316;SIK1|1.694;CHRDL1|0.429;AEBP1|2.049;JAG1|1.703	12	4110	76	21829	http://www.ebi.ac.uk/QuickGO/GTerm?id=GO:0018130	[]
4	4	regulation of cell cycle process	GO:0010564	0.794	0.824	0	-0.14	6.85695	-11.527	CAV2|0.417	1	448	76	21829	http://www.ebi.ac.uk/QuickGO/GTerm?id=GO:0010564	[]
4	3,4	sexual reproduction	GO:0019953	0.795	0.825	0	-0.14	6.85695	-11.527	ADAMTS1|1.877	1	450	76	21829	http://www.ebi.ac.uk/QuickGO/GTerm?id=GO:0019953	[]
5	5	regulation of hydrolase activity	GO:0051336	0.798	0.828	-0.35	-0.3	6.85695	-11.527	CAV2|0.417;CYR61|2.231;WFDC1|0.417	3	1206	76	21829	http://www.ebi.ac.uk/QuickGO/GTerm?id=GO:0051336	[]
3	3	response to biotic stimulus	GO:0009607	0.801	0.83	0	-0.14	6.85695	-11.527	MST1R|1.705	1	458	76	21829	http://www.ebi.ac.uk/QuickGO/GTerm?id=GO:0009607	[]
7	6,7	negative regulation of protein modification process	GO:0031400	0.805	0.834	0	-0.14	6.85695	-11.527	DUSP8|1.567	1	464	76	21829	http://www.ebi.ac.uk/QuickGO/GTerm?id=GO:0031400	[]
3	3	multi-organism reproductive process	GO:0044703	0.805	0.834	0	-0.14	6.85695	-11.527	ADAMTS1|1.877	1	464	76	21829	http://www.ebi.ac.uk/QuickGO/GTerm?id=GO:0044703	[]
8	6,7,8	protein targeting	GO:0006605	0.806	0.834	0	-0.14	6.85695	-11.527	OSCP1|0.14	1	465	76	21829	http://www.ebi.ac.uk/QuickGO/GTerm?id=GO:0006605	[]
4	4	cellular macromolecule metabolic process	GO:0044260	0.808	0.835	8.91	3.99	6.85695	-11.527	RIC3|0.491;NIM1K|1.617;CAV2|0.417;CDH2|1.906;CTSK|2.109;CRCP|0.599;ACSL1|0.614;MST1R|1.705;CHAC1|0.521;CYR61|2.231;EGR1|2.376;JUN|2.208;PPARGC1A|0.564;TOP2A|0.53;RARA|1.526;FOS|3.316;WFDC1|0.417;SIK1|1.694;CHRDL1|0.429;SGK2|0.559;IRS2|1.866;KL|3.059;RNF144A|2.045;LPAR3|2.868;AEBP1|2.049;ANKRD6|0.513;DUSP8|1.567;JAG1|1.703;PDK4|0.421	29	9262	76	21829	http://www.ebi.ac.uk/QuickGO/GTerm?id=GO:0044260	[]
5	5	small molecule biosynthetic process	GO:0044283	0.814	0.842	0	-0.14	6.85695	-11.527	PDK4|0.421	1	477	76	21829	http://www.ebi.ac.uk/QuickGO/GTerm?id=GO:0044283	[]
4	4	microtubule cytoskeleton organization	GO:0000226	0.817	0.844	0	-0.14	6.85695	-11.527	MZT1|0.461	1	481	76	21829	http://www.ebi.ac.uk/QuickGO/GTerm?id=GO:0000226	[]
5	5	organic cyclic compound biosynthetic process	GO:1901362	0.817	0.844	3.58	1.52	6.85695	-11.527	CRCP|0.599;CYR61|2.231;PANK1|0.639;EGR1|2.376;JUN|2.208;PPARGC1A|0.564;RARA|1.526;FOS|3.316;SIK1|1.694;CHRDL1|0.429;AEBP1|2.049;JAG1|1.703	12	4200	76	21829	http://www.ebi.ac.uk/QuickGO/GTerm?id=GO:1901362	[]
6	6	cellular macromolecular complex assembly	GO:0034622	0.819	0.845	-0.65	-0.44	6.85695	-11.527	RIC3|0.491;MZT1|0.461	2	884	76	21829	http://www.ebi.ac.uk/QuickGO/GTerm?id=GO:0034622	[]
5	5	cellular macromolecule catabolic process	GO:0044265	0.82	0.845	0.63	0.15	6.85695	-11.527	CTSK|2.109;RNF144A|2.045	2	886	76	21829	http://www.ebi.ac.uk/QuickGO/GTerm?id=GO:0044265	[]
4	4	nucleobase-containing compound metabolic process	GO:0006139	0.821	0.846	1.92	0.75	6.85695	-11.527	SLC25A25|0.627;CRCP|0.599;ENPP2|0.6;CYR61|2.231;PANK1|0.639;EGR1|2.376;JUN|2.208;PPARGC1A|0.564;TOP2A|0.53;RARA|1.526;FOS|3.316;HKDC1|2.366;SIK1|1.694;CHRDL1|0.429;COX7C|0.658;AEBP1|2.049;JAG1|1.703	17	5755	76	21829	http://www.ebi.ac.uk/QuickGO/GTerm?id=GO:0006139	[]
7	7	protein modification by small protein conjugation or removal	GO:0070647	0.825	0.85	0.69	0.18	6.85695	-11.527	EGR1|2.376;RNF144A|2.045	2	896	76	21829	http://www.ebi.ac.uk/QuickGO/GTerm?id=GO:0070647	[]
4	4	organic cyclic compound metabolic process	GO:1901360	0.828	0.853	-0.79	-0.51	6.85695	-11.527	SLC25A25|0.627;CRCP|0.599;ENPP2|0.6;CYR61|2.231;PANK1|0.639;EGR1|2.376;JUN|2.208;PPARGC1A|0.564;TOP2A|0.53;RARA|1.526;FOS|3.316;HKDC1|2.366;MAOA|0.614;SIK1|1.694;CHRDL1|0.429;COX7C|0.658;AEBP1|2.049;JAG1|1.703	18	6091	76	21829	http://www.ebi.ac.uk/QuickGO/GTerm?id=GO:1901360	[]
6	5,6	DNA metabolic process	GO:0006259	0.831	0.855	-0.52	-0.38	6.85695	-11.527	PPARGC1A|0.564;TOP2A|0.53	2	910	76	21829	http://www.ebi.ac.uk/QuickGO/GTerm?id=GO:0006259	[]
4	4	organic substance biosynthetic process	GO:1901576	0.836	0.86	5.4	2.36	6.85695	-11.527	CERS6|0.346;CRCP|0.599;ACSL1|0.614;CYR61|2.231;PANK1|0.639;EGR1|2.376;JUN|2.208;PPARGC1A|0.564;TOP2A|0.53;RARA|1.526;FOS|3.316;SIK1|1.694;CHRDL1|0.429;IRS2|1.866;AGPAT2|1.693;AEBP1|2.049;JAG1|1.703;PDK4|0.421	18	6124	76	21829	http://www.ebi.ac.uk/QuickGO/GTerm?id=GO:1901576	[]
2	2	behavior	GO:0007610	0.836	0.86	0	-0.14	6.85695	-11.527	CCK1R|5.905	1	513	76	21829	http://www.ebi.ac.uk/QuickGO/GTerm?id=GO:0007610	[]
6	5,6	regulation of gene expression	GO:0010468	0.837	0.86	3.44	1.45	6.85695	-11.527	CHAC1|0.521;CYR61|2.231;EGR1|2.376;JUN|2.208;PPARGC1A|0.564;RARA|1.526;FOS|3.316;SIK1|1.694;CHRDL1|0.429;AEBP1|2.049;JAG1|1.703	11	3963	76	21829	http://www.ebi.ac.uk/QuickGO/GTerm?id=GO:0010468	[]
8	8	chemical synaptic transmission	GO:0007268	0.838	0.86	0	-0.14	6.85695	-11.527	RIC3|0.491	1	515	76	21829	http://www.ebi.ac.uk/QuickGO/GTerm?id=GO:0007268	[]
5	5	sensory perception	GO:0007600	0.845	0.867	0	-0.14	6.85695	-11.527	TRPA1|0.123	1	528	76	21829	http://www.ebi.ac.uk/QuickGO/GTerm?id=GO:0007600	[]
6	6	amide biosynthetic process	GO:0043604	0.847	0.868	0.11	-0.09	6.85695	-11.527	CERS6|0.346;CYR61|2.231	2	945	76	21829	http://www.ebi.ac.uk/QuickGO/GTerm?id=GO:0043604	[]
5	5	regulation of nucleobase-containing compound metabolic process	GO:0019219	0.848	0.869	3.16	1.32	6.85695	-11.527	CYR61|2.231;EGR1|2.376;JUN|2.208;PPARGC1A|0.564;RARA|1.526;FOS|3.316;SIK1|1.694;CHRDL1|0.429;AEBP1|2.049;JAG1|1.703	10	3687	76	21829	http://www.ebi.ac.uk/QuickGO/GTerm?id=GO:0019219	[]
4	4	macromolecular complex subunit organization	GO:0043933	0.848	0.869	-2.7	-1.39	6.85695	-11.527	RIC3|0.491;CAV2|0.417;FAT1|0.605;SPTBN5|28.402;MZT1|0.461	5	2034	76	21829	http://www.ebi.ac.uk/QuickGO/GTerm?id=GO:0043933	[]
4	4	embryonic morphogenesis	GO:0048598	0.85	0.871	0	-0.14	6.85695	-11.527	CDH2|1.906	1	538	76	21829	http://www.ebi.ac.uk/QuickGO/GTerm?id=GO:0048598	[]
4	4	heterocycle metabolic process	GO:0046483	0.856	0.875	1.92	0.75	6.85695	-11.527	SLC25A25|0.627;CRCP|0.599;ENPP2|0.6;CYR61|2.231;PANK1|0.639;EGR1|2.376;JUN|2.208;PPARGC1A|0.564;TOP2A|0.53;RARA|1.526;FOS|3.316;HKDC1|2.366;SIK1|1.694;CHRDL1|0.429;COX7C|0.658;AEBP1|2.049;JAG1|1.703	17	5914	76	21829	http://www.ebi.ac.uk/QuickGO/GTerm?id=GO:0046483	[]
3	3	biosynthetic process	GO:0009058	0.86	0.88	5.4	2.36	6.85695	-11.527	CERS6|0.346;CRCP|0.599;ACSL1|0.614;CYR61|2.231;PANK1|0.639;EGR1|2.376;JUN|2.208;PPARGC1A|0.564;TOP2A|0.53;RARA|1.526;FOS|3.316;SIK1|1.694;CHRDL1|0.429;IRS2|1.866;AGPAT2|1.693;AEBP1|2.049;JAG1|1.703;PDK4|0.421	18	6244	76	21829	http://www.ebi.ac.uk/QuickGO/GTerm?id=GO:0009058	[]
6	6	dephosphorylation	GO:0016311	0.862	0.881	0	-0.14	6.85695	-11.527	DUSP8|1.567	1	560	76	21829	http://www.ebi.ac.uk/QuickGO/GTerm?id=GO:0016311	[]
9	8,9	ubiquitin-dependent protein catabolic process	GO:0006511	0.876	0.895	0	-0.14	6.85695	-11.527	RNF144A|2.045	1	591	76	21829	http://www.ebi.ac.uk/QuickGO/GTerm?id=GO:0006511	[]
8	7,8	modification-dependent protein catabolic process	GO:0019941	0.879	0.897	0	-0.14	6.85695	-11.527	RNF144A|2.045	1	598	76	21829	http://www.ebi.ac.uk/QuickGO/GTerm?id=GO:0019941	[]
5	5	macromolecule catabolic process	GO:0009057	0.879	0.897	0.63	0.15	6.85695	-11.527	CTSK|2.109;RNF144A|2.045	2	1030	76	21829	http://www.ebi.ac.uk/QuickGO/GTerm?id=GO:0009057	[]
4	4	cellular biosynthetic process	GO:0044249	0.881	0.898	5.19	2.26	6.85695	-11.527	CERS6|0.346;CRCP|0.599;CYR61|2.231;PANK1|0.639;EGR1|2.376;JUN|2.208;PPARGC1A|0.564;TOP2A|0.53;RARA|1.526;FOS|3.316;SIK1|1.694;CHRDL1|0.429;IRS2|1.866;AGPAT2|1.693;AEBP1|2.049;JAG1|1.703;PDK4|0.421	17	6050	76	21829	http://www.ebi.ac.uk/QuickGO/GTerm?id=GO:0044249	[]
5	5	chromosome organization	GO:0051276	0.882	0.899	-0.58	-0.41	6.85695	-11.527	TOP2A|0.53;SMC2|0.493	2	1038	76	21829	http://www.ebi.ac.uk/QuickGO/GTerm?id=GO:0051276	[]
6	6	modification-dependent macromolecule catabolic process	GO:0043632	0.883	0.899	0	-0.14	6.85695	-11.527	RNF144A|2.045	1	606	76	21829	http://www.ebi.ac.uk/QuickGO/GTerm?id=GO:0043632	[]
6	6	protein localization to organelle	GO:0033365	0.886	0.902	0	-0.14	6.85695	-11.527	OSCP1|0.14	1	615	76	21829	http://www.ebi.ac.uk/QuickGO/GTerm?id=GO:0033365	[]
7	7	positive regulation of GTPase activity	GO:0043547	0.888	0.903	0	-0.14	6.85695	-11.527	CAV2|0.417	1	618	76	21829	http://www.ebi.ac.uk/QuickGO/GTerm?id=GO:0043547	[]
4	4	organelle organization	GO:0006996	0.892	0.907	-4.82	-2.37	6.85695	-11.527	CAV2|0.417;FAT1|0.605;PPARGC1A|0.564;TOP2A|0.53;SMC2|0.493;KIAA1324|5.521;OSCP1|0.14;SPTBN5|28.402;MZT1|0.461	9	3562	76	21829	http://www.ebi.ac.uk/QuickGO/GTerm?id=GO:0006996	[]
4	4	cellular nitrogen compound metabolic process	GO:0034641	0.893	0.908	-2.92	-1.49	6.85695	-11.527	CERS6|0.346;SLC25A25|0.627;CRCP|0.599;CHAC1|0.521;ENPP2|0.6;CYR61|2.231;PANK1|0.639;EGR1|2.376;JUN|2.208;PPARGC1A|0.564;TOP2A|0.53;RARA|1.526;FOS|3.316;HKDC1|2.366;SIK1|1.694;CHRDL1|0.429;COX7C|0.658;AEBP1|2.049;JAG1|1.703	19	6740	76	21829	http://www.ebi.ac.uk/QuickGO/GTerm?id=GO:0034641	[]
5	5	cellular macromolecule biosynthetic process	GO:0034645	0.895	0.91	3.93	1.68	6.85695	-11.527	CRCP|0.599;CYR61|2.231;EGR1|2.376;JUN|2.208;PPARGC1A|0.564;TOP2A|0.53;RARA|1.526;FOS|3.316;SIK1|1.694;CHRDL1|0.429;IRS2|1.866;AEBP1|2.049;JAG1|1.703	13	4881	76	21829	http://www.ebi.ac.uk/QuickGO/GTerm?id=GO:0034645	[]
7	6,7	peptide transport	GO:0015833	0.9	0.914	0.58	0.13	6.85695	-11.527	OSCP1|0.14;IRS2|1.866	2	1095	76	21829	http://www.ebi.ac.uk/QuickGO/GTerm?id=GO:0015833	[]
5	4,5	single-organism organelle organization	GO:1902589	0.901	0.914	-1.52	-0.85	6.85695	-11.527	CAV2|0.417;FAT1|0.605;TOP2A|0.53;SMC2|0.493;MZT1|0.461	5	2238	76	21829	http://www.ebi.ac.uk/QuickGO/GTerm?id=GO:1902589	[]
6	5,6	single-organism intracellular transport	GO:1902582	0.901	0.914	-0.6	-0.42	6.85695	-11.527	OSCP1|0.14;SPTBN5|28.402	2	1098	76	21829	http://www.ebi.ac.uk/QuickGO/GTerm?id=GO:1902582	[]
6	5,6	actin cytoskeleton organization	GO:0030036	0.902	0.914	0	-0.14	6.85695	-11.527	FAT1|0.605	1	656	76	21829	http://www.ebi.ac.uk/QuickGO/GTerm?id=GO:0030036	[]
6	5,6	cytosolic transport	GO:0016482	0.902	0.914	0	-0.14	6.85695	-11.527	OSCP1|0.14	1	657	76	21829	http://www.ebi.ac.uk/QuickGO/GTerm?id=GO:0016482	[]
4	4	regulation of nitrogen compound metabolic process	GO:0051171	0.904	0.915	3.16	1.32	6.85695	-11.527	CYR61|2.231;EGR1|2.376;JUN|2.208;PPARGC1A|0.564;RARA|1.526;FOS|3.316;SIK1|1.694;CHRDL1|0.429;AEBP1|2.049;JAG1|1.703	10	3958	76	21829	http://www.ebi.ac.uk/QuickGO/GTerm?id=GO:0051171	[]
6	5,6	small GTPase mediated signal transduction	GO:0007264	0.904	0.915	0	-0.14	6.85695	-11.527	JUN|2.208	1	662	76	21829	http://www.ebi.ac.uk/QuickGO/GTerm?id=GO:0007264	[]
6	6	amide transport	GO:0042886	0.906	0.916	0.58	0.13	6.85695	-11.527	OSCP1|0.14;IRS2|1.866	2	1117	76	21829	http://www.ebi.ac.uk/QuickGO/GTerm?id=GO:0042886	[]
5	5	cellular nitrogen compound biosynthetic process	GO:0044271	0.908	0.917	4.04	1.73	6.85695	-11.527	CERS6|0.346;CRCP|0.599;CYR61|2.231;PANK1|0.639;EGR1|2.376;JUN|2.208;PPARGC1A|0.564;RARA|1.526;FOS|3.316;SIK1|1.694;CHRDL1|0.429;AEBP1|2.049;JAG1|1.703	13	4956	76	21829	http://www.ebi.ac.uk/QuickGO/GTerm?id=GO:0044271	[]
9	9	protein ubiquitination	GO:0016567	0.909	0.918	0	-0.14	6.85695	-11.527	RNF144A|2.045	1	676	76	21829	http://www.ebi.ac.uk/QuickGO/GTerm?id=GO:0016567	[]
6	6	regulation of GTPase activity	GO:0043087	0.909	0.918	0	-0.14	6.85695	-11.527	CAV2|0.417	1	678	76	21829	http://www.ebi.ac.uk/QuickGO/GTerm?id=GO:0043087	[]
5	5	macromolecule biosynthetic process	GO:0009059	0.915	0.924	3.93	1.68	6.85695	-11.527	CRCP|0.599;CYR61|2.231;EGR1|2.376;JUN|2.208;PPARGC1A|0.564;TOP2A|0.53;RARA|1.526;FOS|3.316;SIK1|1.694;CHRDL1|0.429;IRS2|1.866;AEBP1|2.049;JAG1|1.703	13	5009	76	21829	http://www.ebi.ac.uk/QuickGO/GTerm?id=GO:0009059	[]
5	5	nucleic acid metabolic process	GO:0090304	0.916	0.924	3.88	1.66	6.85695	-11.527	CRCP|0.599;ENPP2|0.6;CYR61|2.231;EGR1|2.376;JUN|2.208;PPARGC1A|0.564;TOP2A|0.53;RARA|1.526;FOS|3.316;SIK1|1.694;CHRDL1|0.429;AEBP1|2.049;JAG1|1.703	13	5014	76	21829	http://www.ebi.ac.uk/QuickGO/GTerm?id=GO:0090304	[]
4	4	actin filament-based process	GO:0030029	0.92	0.927	0	-0.14	6.85695	-11.527	FAT1|0.605	1	711	76	21829	http://www.ebi.ac.uk/QuickGO/GTerm?id=GO:0030029	[]
5	5	embryo development	GO:0009790	0.92	0.927	0	-0.14	6.85695	-11.527	CDH2|1.906	1	714	76	21829	http://www.ebi.ac.uk/QuickGO/GTerm?id=GO:0009790	[]
5	5	cellular response to DNA damage stimulus	GO:0006974	0.921	0.927	0	-0.14	6.85695	-11.527	TOP2A|0.53	1	715	76	21829	http://www.ebi.ac.uk/QuickGO/GTerm?id=GO:0006974	[]
6	5,6	RNA metabolic process	GO:0016070	0.922	0.927	3.38	1.43	6.85695	-11.527	CRCP|0.599;CYR61|2.231;EGR1|2.376;JUN|2.208;PPARGC1A|0.564;RARA|1.526;FOS|3.316;SIK1|1.694;CHRDL1|0.429;AEBP1|2.049;JAG1|1.703	11	4404	76	21829	http://www.ebi.ac.uk/QuickGO/GTerm?id=GO:0016070	[]
5	5	organonitrogen compound biosynthetic process	GO:1901566	0.925	0.93	-1.25	-0.72	6.85695	-11.527	CERS6|0.346;CYR61|2.231;PANK1|0.639;PPARGC1A|0.564	4	1990	76	21829	http://www.ebi.ac.uk/QuickGO/GTerm?id=GO:1901566	[]
5	4,5	intracellular transport	GO:0046907	0.925	0.93	-1.45	-0.82	6.85695	-11.527	SLC25A25|0.627;OSCP1|0.14;SPTBN5|28.402	3	1605	76	21829	http://www.ebi.ac.uk/QuickGO/GTerm?id=GO:0046907	[]
5	5	vesicle-mediated transport	GO:0016192	0.929	0.933	-0.6	-0.42	6.85695	-11.527	CAV2|0.417;ENPP2|0.6	2	1209	76	21829	http://www.ebi.ac.uk/QuickGO/GTerm?id=GO:0016192	[]
3	3	microtubule-based process	GO:0007017	0.93	0.934	0	-0.14	6.85695	-11.527	MZT1|0.461	1	749	76	21829	http://www.ebi.ac.uk/QuickGO/GTerm?id=GO:0007017	[]
4	4	neurological system process	GO:0050877	0.944	0.947	0	-0.14	6.85695	-11.527	TRPA1|0.123	1	812	76	21829	http://www.ebi.ac.uk/QuickGO/GTerm?id=GO:0050877	[]
6	5,6	protein transport	GO:0015031	0.958	0.96	0.58	0.13	6.85695	-11.527	OSCP1|0.14;IRS2|1.866	2	1382	76	21829	http://www.ebi.ac.uk/QuickGO/GTerm?id=GO:0015031	[]
5	5	cytoskeleton organization	GO:0007010	0.964	0.966	-0.55	-0.4	6.85695	-11.527	FAT1|0.605;MZT1|0.461	2	1431	76	21829	http://www.ebi.ac.uk/QuickGO/GTerm?id=GO:0007010	[]
7	5,6,7	intracellular protein transport	GO:0006886	0.965	0.967	0	-0.14	6.85695	-11.527	OSCP1|0.14	1	943	76	21829	http://www.ebi.ac.uk/QuickGO/GTerm?id=GO:0006886	[]
5	5	peptide metabolic process	GO:0006518	0.971	0.972	0	-0.14	6.85695	-11.527	CHAC1|0.521	1	995	76	21829	http://www.ebi.ac.uk/QuickGO/GTerm?id=GO:0006518	[]
5	5	gene expression	GO:0010467	0.975	0.976	3.67	1.56	6.85695	-11.527	CRCP|0.599;CHAC1|0.521;CYR61|2.231;EGR1|2.376;JUN|2.208;PPARGC1A|0.564;RARA|1.526;FOS|3.316;SIK1|1.694;CHRDL1|0.429;AEBP1|2.049;JAG1|1.703	12	5336	76	21829	http://www.ebi.ac.uk/QuickGO/GTerm?id=GO:0010467	[]
3	3	system process	GO:0003008	0.992	0.992	0	-0.14	6.85695	-11.527	TRPA1|0.123	1	1332	76	21829	http://www.ebi.ac.uk/QuickGO/GTerm?id=GO:0003008	[]

## Sheet:  cell components
maxLevel	levels	GO_Name	GO_ID	Pvalue	Pvalue_adjusted	Genes	Count	Pop_Hit	List_Total	Background_Genes	URL
2	2	extracellular region part	GO:0044421	6.01e-07	0.000148	LRFN5|1.736;ADAMTS1|1.877;ADAMTS9|0.583;CDH2|1.906;CTSK|2.109;SOD3|0.184;PROM1|0.467;SLC25A25|0.627;FAT1|0.605;CYR61|2.231;RARRES1|1.505;IGFBP1|0.446;WFDC1|0.417;CDHR5|0.509;GPX2|7.618;LAP3|0.573;REEP5|0.534;KIAA1324|5.521;BPHL|0.639;KL|3.059;SLC6A14|0.423;AEBP1|2.049;SPTBN5|28.402;Gga.6352|0.616;CPNE4|4.549;LIPI|0.594;LDHB|0.618;HAO2|0.556;CKAP4|0.609	29	2913	82	21280	http://www.ebi.ac.uk/QuickGO/GTerm?id=GO:0044421
2	2	extracellular region	GO:0005576	3.13e-06	0.000295	LRFN5|1.736;ADAMTS1|1.877;ADAMTS9|0.583;CDH2|1.906;CTSK|2.109;SOD3|0.184;PROM1|0.467;SLC25A25|0.627;FAT1|0.605;CYR61|2.231;RARRES1|1.505;IGFBP1|0.446;WFDC1|0.417;CDHR5|0.509;GPX2|7.618;LAP3|0.573;REEP5|0.534;KIAA1324|5.521;CHRDL1|0.429;BPHL|0.639;KL|3.059;SLC6A14|0.423;AEBP1|2.049;SPTBN5|28.402;Gga.6352|0.616;CPNE4|4.549;LIPI|0.594;LDHB|0.618;HAO2|0.556;CKAP4|0.609	30	3338	82	21280	http://www.ebi.ac.uk/QuickGO/GTerm?id=GO:0005576
4	4	extracellular membrane-bounded organelle	GO:0065010	3.6e-06	0.000295	CDH2|1.906;SOD3|0.184;PROM1|0.467;SLC25A25|0.627;FAT1|0.605;RARRES1|1.505;CDHR5|0.509;GPX2|7.618;LAP3|0.573;REEP5|0.534;KIAA1324|5.521;BPHL|0.639;KL|3.059;SLC6A14|0.423;AEBP1|2.049;SPTBN5|28.402;Gga.6352|0.616;CPNE4|4.549;LDHB|0.618;HAO2|0.556;CKAP4|0.609	21	1816	82	21280	http://www.ebi.ac.uk/QuickGO/GTerm?id=GO:0065010
5	5	membrane-bounded vesicle	GO:0031988	7.07e-06	0.000338	CAV2|0.417;CDH2|1.906;SOD3|0.184;PROM1|0.467;SLC25A25|0.627;CRCP|0.599;FAT1|0.605;RARRES1|1.505;CDHR5|0.509;GPX2|7.618;LAP3|0.573;REEP5|0.534;KIAA1324|5.521;BPHL|0.639;KL|3.059;SLC6A14|0.423;AEBP1|2.049;SPTBN5|28.402;Gga.6352|0.616;CPNE4|4.549;LDHB|0.618;HAO2|0.556;CKAP4|0.609	23	2222	82	21280	http://www.ebi.ac.uk/QuickGO/GTerm?id=GO:0031988
4	4	extracellular exosome	GO:0070062	9.09e-06	0.000338	CDH2|1.906;SOD3|0.184;PROM1|0.467;SLC25A25|0.627;FAT1|0.605;RARRES1|1.505;CDHR5|0.509;GPX2|7.618;LAP3|0.573;REEP5|0.534;KIAA1324|5.521;BPHL|0.639;KL|3.059;SLC6A14|0.423;AEBP1|2.049;SPTBN5|28.402;Gga.6352|0.616;CPNE4|4.549;LDHB|0.618;HAO2|0.556;CKAP4|0.609	21	1927	82	21280	http://www.ebi.ac.uk/QuickGO/GTerm?id=GO:0070062
3	3	extracellular vesicle	GO:1903561	9.46e-06	0.000338	CDH2|1.906;SOD3|0.184;PROM1|0.467;SLC25A25|0.627;FAT1|0.605;RARRES1|1.505;CDHR5|0.509;GPX2|7.618;LAP3|0.573;REEP5|0.534;KIAA1324|5.521;BPHL|0.639;KL|3.059;SLC6A14|0.423;AEBP1|2.049;SPTBN5|28.402;Gga.6352|0.616;CPNE4|4.549;LDHB|0.618;HAO2|0.556;CKAP4|0.609	21	1932	82	21280	http://www.ebi.ac.uk/QuickGO/GTerm?id=GO:1903561
3	3	extracellular organelle	GO:0043230	9.61e-06	0.000338	CDH2|1.906;SOD3|0.184;PROM1|0.467;SLC25A25|0.627;FAT1|0.605;RARRES1|1.505;CDHR5|0.509;GPX2|7.618;LAP3|0.573;REEP5|0.534;KIAA1324|5.521;BPHL|0.639;KL|3.059;SLC6A14|0.423;AEBP1|2.049;SPTBN5|28.402;Gga.6352|0.616;CPNE4|4.549;LDHB|0.618;HAO2|0.556;CKAP4|0.609	21	1934	82	21280	http://www.ebi.ac.uk/QuickGO/GTerm?id=GO:0043230
4	4	vesicle	GO:0031982	1.55e-05	0.000478	CAV2|0.417;ADAMTS1|1.877;CDH2|1.906;SOD3|0.184;PROM1|0.467;SLC25A25|0.627;CRCP|0.599;FAT1|0.605;RARRES1|1.505;PANK1|0.639;CDHR5|0.509;GPX2|7.618;LAP3|0.573;REEP5|0.534;KIAA1324|5.521;BPHL|0.639;KL|3.059;SLC6A14|0.423;AEBP1|2.049;SPTBN5|28.402;Gga.6352|0.616;CPNE4|4.549;LDHB|0.618;HAO2|0.556;CKAP4|0.609	25	2680	82	21280	http://www.ebi.ac.uk/QuickGO/GTerm?id=GO:0031982
3	3	membrane-bounded organelle	GO:0043227	3.36e-05	0.000919	RIC3|0.491;NIM1K|1.617;CAV2|0.417;CERS6|0.346;IRF2BP2|1.672;CDH2|1.906;CTSK|2.109;SOD3|0.184;PROM1|0.467;SLC25A25|0.627;CRCP|0.599;ACSL1|0.614;MST1R|1.705;FAT1|0.605;GFRA3|0.646;CHAC1|0.521;ECI2|0.596;RARRES1|1.505;PANK1|0.639;EGR1|2.376;JUN|2.208;PPARGC1A|0.564;CMAS|0.652;TOP2A|0.53;RARA|1.526;FOS|3.316;CDHR5|0.509;HKDC1|2.366;MAOA|0.614;GPX2|7.618;LAP3|0.573;SIK1|1.694;SMC2|0.493;REEP5|0.534;KI…	59	10575	82	21280	http://www.ebi.ac.uk/QuickGO/GTerm?id=GO:0043227
2	2	organelle	GO:0043226	0.000236	0.0058	RIC3|0.491;NIM1K|1.617;CAV2|0.417;CERS6|0.346;ADAMTS1|1.877;IRF2BP2|1.672;CDH2|1.906;CTSK|2.109;SOD3|0.184;PROM1|0.467;SLC25A25|0.627;CRCP|0.599;ACSL1|0.614;MST1R|1.705;FAT1|0.605;GFRA3|0.646;CHAC1|0.521;EVC|0.468;ECI2|0.596;RARRES1|1.505;PANK1|0.639;EGR1|2.376;JUN|2.208;PPARGC1A|0.564;CMAS|0.652;TOP2A|0.53;RARA|1.526;FOS|3.316;CDHR5|0.509;HKDC1|2.366;MAOA|0.614;GPX2|7.618;LAP3|0.573;SIK1|1.694;S…	63	12293	82	21280	http://www.ebi.ac.uk/QuickGO/GTerm?id=GO:0043226
5	4,5	cytoplasmic part	GO:0044444	0.000521	0.0116	RIC3|0.491;CAV2|0.417;CERS6|0.346;ADAMTS1|1.877;CDH2|1.906;CTSK|2.109;SOD3|0.184;CDO1|0.672;PROM1|0.467;SLC25A25|0.627;CRCP|0.599;ACSL1|0.614;MST1R|1.705;FAT1|0.605;GFRA3|0.646;CHAC1|0.521;ECI2|0.596;PANK1|0.639;FOS|3.316;HKDC1|2.366;MAOA|0.614;LAP3|0.573;REEP5|0.534;KIAA1324|5.521;BPHL|0.639;CS|1.611;PIPOX|1.809;IRS2|1.866;AGPAT2|1.693;RNF144A|2.045;CRHR2|2.007;COX7C|0.658;Gga.6352|0.616;LDHB|0.…	40	6575	82	21280	http://www.ebi.ac.uk/QuickGO/GTerm?id=GO:0044444
3	3	extracellular space	GO:0005615	0.00141	0.0289	LRFN5|1.736;ADAMTS9|0.583;CTSK|2.109;SOD3|0.184;PROM1|0.467;CYR61|2.231;IGFBP1|0.446;WFDC1|0.417;KL|3.059;AEBP1|2.049;LIPI|0.594	11	989	82	21280	http://www.ebi.ac.uk/QuickGO/GTerm?id=GO:0005615
6	5,6	mitochondrion	GO:0005739	0.00171	0.0324	SLC25A25|0.627;ACSL1|0.614;ECI2|0.596;HKDC1|2.366;MAOA|0.614;LAP3|0.573;BPHL|0.639;CS|1.611;COX7C|0.658;Gga.6352|0.616;LDHB|0.618;RMDN2|0.604;PDK4|0.421;HAO2|0.556	14	1504	82	21280	http://www.ebi.ac.uk/QuickGO/GTerm?id=GO:0005739
4	4	cytoplasm	GO:0005737	0.00197	0.0346	RIC3|0.491;NIM1K|1.617;CAV2|0.417;CERS6|0.346;ADAMTS1|1.877;CDH2|1.906;CTSK|2.109;SOD3|0.184;CDO1|0.672;PROM1|0.467;SLC25A25|0.627;CRCP|0.599;ACSL1|0.614;MST1R|1.705;FAT1|0.605;GFRA3|0.646;CHAC1|0.521;ECI2|0.596;PANK1|0.639;EGR1|2.376;FOS|3.316;HKDC1|2.366;MAOA|0.614;LAP3|0.573;SIK1|1.694;SMC2|0.493;REEP5|0.534;KIAA1324|5.521;BPHL|0.639;CS|1.611;PIPOX|1.809;IRS2|1.866;AGPAT2|1.693;RNF144A|2.045;C…	48	8963	82	21280	http://www.ebi.ac.uk/QuickGO/GTerm?id=GO:0005737
5	4,5	intracellular membrane-bounded organelle	GO:0043231	0.00272	0.0447	RIC3|0.491;NIM1K|1.617;CAV2|0.417;CERS6|0.346;IRF2BP2|1.672;CTSK|2.109;SOD3|0.184;PROM1|0.467;SLC25A25|0.627;CRCP|0.599;ACSL1|0.614;MST1R|1.705;FAT1|0.605;GFRA3|0.646;CHAC1|0.521;ECI2|0.596;PANK1|0.639;EGR1|2.376;JUN|2.208;PPARGC1A|0.564;CMAS|0.652;TOP2A|0.53;RARA|1.526;FOS|3.316;HKDC1|2.366;MAOA|0.614;LAP3|0.573;SIK1|1.694;SMC2|0.493;REEP5|0.534;KIAA1324|5.521;BPHL|0.639;CS|1.611;SGK2|0.559;PIPO…	50	9596	82	21280	http://www.ebi.ac.uk/QuickGO/GTerm?id=GO:0043231
3	3	extracellular matrix	GO:0031012	0.00309	0.0451	LRFN5|1.736;ADAMTS1|1.877;ADAMTS9|0.583;SOD3|0.184;CYR61|2.231;AEBP1|2.049;CKAP4|0.609	7	498	82	21280	http://www.ebi.ac.uk/QuickGO/GTerm?id=GO:0031012
7	7	gamma-tubulin small complex, mitotic spindle pole body	GO:0061495	0.00385	0.0451	MZT1|0.461	1	1	82	21280	http://www.ebi.ac.uk/QuickGO/GTerm?id=GO:0061495
6	6	gamma-tubulin small complex, spindle pole body	GO:0000928	0.00385	0.0451	MZT1|0.461	1	1	82	21280	http://www.ebi.ac.uk/QuickGO/GTerm?id=GO:0000928
5	5	DNA polymerase III complex	GO:0009360	0.00385	0.0451	CRCP|0.599	1	1	82	21280	http://www.ebi.ac.uk/QuickGO/GTerm?id=GO:0009360
9	6,7,8,9	interphase microtubule organizing center	GO:0031021	0.00385	0.0451	MZT1|0.461	1	1	82	21280	http://www.ebi.ac.uk/QuickGO/GTerm?id=GO:0031021
10	7,8,9,10	mitotic spindle pole body	GO:0044732	0.00385	0.0451	MZT1|0.461	1	1	82	21280	http://www.ebi.ac.uk/QuickGO/GTerm?id=GO:0044732
5	4,5	ciliary membrane	GO:0060170	0.00634	0.0709	PROM1|0.467;SPTBN5|28.402	2	31	82	21280	http://www.ebi.ac.uk/QuickGO/GTerm?id=GO:0060170
3	3	basolateral part of cell	GO:1990794	0.00769	0.0788	ATP1A1|1.604	1	2	82	21280	http://www.ebi.ac.uk/QuickGO/GTerm?id=GO:1990794
3	3	lateral part of cell	GO:0097574	0.00769	0.0788	ATP1A1|1.604	1	2	82	21280	http://www.ebi.ac.uk/QuickGO/GTerm?id=GO:0097574
4	3,4	intracellular organelle	GO:0043229	0.00907	0.0843	RIC3|0.491;NIM1K|1.617;CAV2|0.417;CERS6|0.346;ADAMTS1|1.877;IRF2BP2|1.672;CDH2|1.906;CTSK|2.109;SOD3|0.184;PROM1|0.467;SLC25A25|0.627;CRCP|0.599;ACSL1|0.614;MST1R|1.705;FAT1|0.605;GFRA3|0.646;CHAC1|0.521;EVC|0.468;ECI2|0.596;PANK1|0.639;EGR1|2.376;JUN|2.208;PPARGC1A|0.564;CMAS|0.652;TOP2A|0.53;RARA|1.526;FOS|3.316;HKDC1|2.366;MAOA|0.614;LAP3|0.573;SIK1|1.694;SMC2|0.493;REEP5|0.534;KIAA1324|5.521;…	55	11407	82	21280	http://www.ebi.ac.uk/QuickGO/GTerm?id=GO:0043229
6	5,6	microbody	GO:0042579	0.00953	0.0843	ECI2|0.596;PIPOX|1.809;HAO2|0.556	3	113	82	21280	http://www.ebi.ac.uk/QuickGO/GTerm?id=GO:0042579
7	6,7	peroxisome	GO:0005777	0.00953	0.0843	ECI2|0.596;PIPOX|1.809;HAO2|0.556	3	113	82	21280	http://www.ebi.ac.uk/QuickGO/GTerm?id=GO:0005777
3	3	cell surface	GO:0009986	0.00959	0.0843	LRFN5|1.736;CDH2|1.906;PROM1|0.467;MST1R|1.705;GFRA3|0.646;CRHR2|2.007	6	470	82	21280	http://www.ebi.ac.uk/QuickGO/GTerm?id=GO:0009986
5	5	gamma-tubulin small complex	GO:0008275	0.0115	0.0858	MZT1|0.461	1	3	82	21280	http://www.ebi.ac.uk/QuickGO/GTerm?id=GO:0008275
8	7,8	transcription factor AP-1 complex	GO:0035976	0.0115	0.0858	FOS|3.316	1	3	82	21280	http://www.ebi.ac.uk/QuickGO/GTerm?id=GO:0035976
5	5	gamma-tubulin large complex	GO:0000931	0.0115	0.0858	MZT1|0.461	1	3	82	21280	http://www.ebi.ac.uk/QuickGO/GTerm?id=GO:0000931
6	4,5,6	photoreceptor disc membrane	GO:0097381	0.0115	0.0858	SPTBN5|28.402	1	3	82	21280	http://www.ebi.ac.uk/QuickGO/GTerm?id=GO:0097381
6	6	gamma-tubulin ring complex	GO:0008274	0.0115	0.0858	MZT1|0.461	1	3	82	21280	http://www.ebi.ac.uk/QuickGO/GTerm?id=GO:0008274
5	4,5	acrosomal vesicle	GO:0001669	0.012	0.0865	CAV2|0.417;CRCP|0.599	2	43	82	21280	http://www.ebi.ac.uk/QuickGO/GTerm?id=GO:0001669
4	4	stereocilium bundle	GO:0032421	0.0125	0.0878	PROM1|0.467;TRPA1|0.123	2	44	82	21280	http://www.ebi.ac.uk/QuickGO/GTerm?id=GO:0032421
4	4	DNA topoisomerase complex (ATP-hydrolyzing)	GO:0009330	0.0153	0.105	TOP2A|0.53	1	4	82	21280	http://www.ebi.ac.uk/QuickGO/GTerm?id=GO:0009330
8	6,7,8	trans-Golgi network	GO:0005802	0.0176	0.115	SOD3|0.184;CHAC1|0.521;KIAA1324|5.521	3	142	82	21280	http://www.ebi.ac.uk/QuickGO/GTerm?id=GO:0005802
5	4,5	apical plasma membrane	GO:0016324	0.0186	0.115	CDH2|1.906;PROM1|0.467;JAG1|1.703	3	145	82	21280	http://www.ebi.ac.uk/QuickGO/GTerm?id=GO:0016324
5	5	plasma membrane raft	GO:0044853	0.0191	0.115	CAV2|0.417;CDH2|1.906	2	55	82	21280	http://www.ebi.ac.uk/QuickGO/GTerm?id=GO:0044853
5	4,5	equatorial microtubule organizing center	GO:0000923	0.0191	0.115	MZT1|0.461	1	5	82	21280	http://www.ebi.ac.uk/QuickGO/GTerm?id=GO:0000923
9	6,7,8,9	spindle pole body	GO:0005816	0.0191	0.115	MZT1|0.461	1	5	82	21280	http://www.ebi.ac.uk/QuickGO/GTerm?id=GO:0005816
6	4,5,6	endoplasmic reticulum	GO:0005783	0.0227	0.132	RIC3|0.491;CERS6|0.346;PROM1|0.467;FOS|3.316;REEP5|0.534;AGPAT2|1.693;CRHR2|2.007;Gga.6352|0.616;CKAP4|0.609	9	1078	82	21280	http://www.ebi.ac.uk/QuickGO/GTerm?id=GO:0005783
4	4	adherens junction	GO:0005912	0.0231	0.132	CAV2|0.417;CDH2|1.906;FAT1|0.605;LAP3|0.573;JAG1|1.703	5	420	82	21280	http://www.ebi.ac.uk/QuickGO/GTerm?id=GO:0005912
3	3	anchoring junction	GO:0070161	0.0248	0.139	CAV2|0.417;CDH2|1.906;FAT1|0.605;LAP3|0.573;JAG1|1.703	5	428	82	21280	http://www.ebi.ac.uk/QuickGO/GTerm?id=GO:0070161
6	4,5,6	photoreceptor outer segment membrane	GO:0042622	0.0304	0.163	PROM1|0.467	1	8	82	21280	http://www.ebi.ac.uk/QuickGO/GTerm?id=GO:0042622
5	5	mitochondrial respiratory chain complex IV	GO:0005751	0.0304	0.163	COX7C|0.658	1	8	82	21280	http://www.ebi.ac.uk/QuickGO/GTerm?id=GO:0005751
4	4	photoreceptor outer segment	GO:0001750	0.0323	0.169	PROM1|0.467;SPTBN5|28.402	2	73	82	21280	http://www.ebi.ac.uk/QuickGO/GTerm?id=GO:0001750
3	3	cell periphery	GO:0071944	0.0344	0.176	CAV2|0.417;CDH2|1.906;PROM1|0.467;MST1R|1.705;SLC2A2|0.635;FAT1|0.605;GFRA3|0.646;PANK1|0.639;SDK2|2.638;ATP1A1|1.604;CCK1R|5.905;KIAA1324|5.521;IRS2|1.866;KL|3.059;LPAR3|2.868;SLC6A14|0.423;CRHR2|2.007;SPTBN5|28.402;LIPI|0.594;JAG1|1.703;MCC|2.125	21	3653	82	21280	http://www.ebi.ac.uk/QuickGO/GTerm?id=GO:0071944
3	3	sperm part	GO:0097223	0.0373	0.179	CAV2|0.417;CRCP|0.599	2	79	82	21280	http://www.ebi.ac.uk/QuickGO/GTerm?id=GO:0097223
6	5,6	fascia adherens	GO:0005916	0.0379	0.179	CDH2|1.906	1	10	82	21280	http://www.ebi.ac.uk/QuickGO/GTerm?id=GO:0005916
4	4	respiratory chain complex IV	GO:0045277	0.0379	0.179	COX7C|0.658	1	10	82	21280	http://www.ebi.ac.uk/QuickGO/GTerm?id=GO:0045277
4	4	condensin complex	GO:0000796	0.0379	0.179	SMC2|0.493	1	10	82	21280	http://www.ebi.ac.uk/QuickGO/GTerm?id=GO:0000796
6	5,6	focal adhesion	GO:0005925	0.0432	0.192	CAV2|0.417;CDH2|1.906;FAT1|0.605;LAP3|0.573	4	342	82	21280	http://www.ebi.ac.uk/QuickGO/GTerm?id=GO:0005925
3	3	apical part of cell	GO:0045177	0.0438	0.192	CDH2|1.906;PROM1|0.467;JAG1|1.703	3	203	82	21280	http://www.ebi.ac.uk/QuickGO/GTerm?id=GO:0045177
5	4,5	cell-substrate adherens junction	GO:0005924	0.0447	0.192	CAV2|0.417;CDH2|1.906;FAT1|0.605;LAP3|0.573	4	346	82	21280	http://www.ebi.ac.uk/QuickGO/GTerm?id=GO:0005924
3	3	plasma membrane	GO:0005886	0.0447	0.192	CAV2|0.417;CDH2|1.906;PROM1|0.467;MST1R|1.705;SLC2A2|0.635;FAT1|0.605;GFRA3|0.646;SDK2|2.638;ATP1A1|1.604;CCK1R|5.905;KIAA1324|5.521;IRS2|1.866;KL|3.059;LPAR3|2.868;SLC6A14|0.423;CRHR2|2.007;SPTBN5|28.402;LIPI|0.594;JAG1|1.703;MCC|2.125	20	3531	82	21280	http://www.ebi.ac.uk/QuickGO/GTerm?id=GO:0005886
5	5	catenin complex	GO:0016342	0.0453	0.192	CDH2|1.906	1	12	82	21280	http://www.ebi.ac.uk/QuickGO/GTerm?id=GO:0016342
6	4,5,6	acrosomal membrane	GO:0002080	0.0453	0.192	CAV2|0.417	1	12	82	21280	http://www.ebi.ac.uk/QuickGO/GTerm?id=GO:0002080
3	3	cell-substrate junction	GO:0030055	0.0463	0.193	CAV2|0.417;CDH2|1.906;FAT1|0.605;LAP3|0.573	4	350	82	21280	http://www.ebi.ac.uk/QuickGO/GTerm?id=GO:0030055
5	5	mitochondrial inner membrane	GO:0005743	0.0496	0.198	SLC25A25|0.627;COX7C|0.658;Gga.6352|0.616;PDK4|0.421	4	358	82	21280	http://www.ebi.ac.uk/QuickGO/GTerm?id=GO:0005743
4	4	plasma membrane region	GO:0098590	0.0501	0.198	CAV2|0.417;CDH2|1.906;PROM1|0.467;SPTBN5|28.402;JAG1|1.703	5	519	82	21280	http://www.ebi.ac.uk/QuickGO/GTerm?id=GO:0098590
3	3	cilium	GO:0005929	0.0517	0.198	PROM1|0.467;EVC|0.468;SPTBN5|28.402;EVC2|0.376	4	363	82	21280	http://www.ebi.ac.uk/QuickGO/GTerm?id=GO:0005929
4	4	proteinaceous extracellular matrix	GO:0005578	0.0521	0.198	LRFN5|1.736;ADAMTS1|1.877;ADAMTS9|0.583;CYR61|2.231	4	364	82	21280	http://www.ebi.ac.uk/QuickGO/GTerm?id=GO:0005578
4	4	gamma-tubulin complex	GO:0000930	0.0526	0.198	MZT1|0.461	1	14	82	21280	http://www.ebi.ac.uk/QuickGO/GTerm?id=GO:0000930
7	5,6,7	endoplasmic reticulum tubular network	GO:0071782	0.0526	0.198	REEP5|0.534	1	14	82	21280	http://www.ebi.ac.uk/QuickGO/GTerm?id=GO:0071782
5	5	nonmotile primary cilium	GO:0031513	0.053	0.198	PROM1|0.467;SPTBN5|28.402	2	96	82	21280	http://www.ebi.ac.uk/QuickGO/GTerm?id=GO:0031513
6	5,6	cytosol	GO:0005829	0.0563	0.207	CDH2|1.906;CDO1|0.672;GFRA3|0.646;CHAC1|0.521;PANK1|0.639;FOS|3.316;HKDC1|2.366;LAP3|0.573;IRS2|1.866;LDHB|0.618;MCC|2.125;CKAP4|0.609	12	1882	82	21280	http://www.ebi.ac.uk/QuickGO/GTerm?id=GO:0005829
3	3	endomembrane system	GO:0012505	0.0592	0.214	RIC3|0.491;CAV2|0.417;CERS6|0.346;SOD3|0.184;PROM1|0.467;CRCP|0.599;CHAC1|0.521;PANK1|0.639;FOS|3.316;REEP5|0.534;KIAA1324|5.521;AGPAT2|1.693;RNF144A|2.045;CRHR2|2.007;Gga.6352|0.616;CKAP4|0.609	16	2753	82	21280	http://www.ebi.ac.uk/QuickGO/GTerm?id=GO:0012505
8	6,7,8	DNA-directed RNA polymerase III complex	GO:0005666	0.0635	0.227	CRCP|0.599	1	17	82	21280	http://www.ebi.ac.uk/QuickGO/GTerm?id=GO:0005666
4	4	DNA polymerase complex	GO:0042575	0.0672	0.236	CRCP|0.599	1	18	82	21280	http://www.ebi.ac.uk/QuickGO/GTerm?id=GO:0042575
4	4	organelle inner membrane	GO:0019866	0.0698	0.242	SLC25A25|0.627;COX7C|0.658;Gga.6352|0.616;PDK4|0.421	4	402	82	21280	http://www.ebi.ac.uk/QuickGO/GTerm?id=GO:0019866
4	4	cytochrome complex	GO:0070069	0.0708	0.242	COX7C|0.658	1	19	82	21280	http://www.ebi.ac.uk/QuickGO/GTerm?id=GO:0070069
3	3	ciliary part	GO:0044441	0.0799	0.269	PROM1|0.467;EVC|0.468;SPTBN5|28.402	3	261	82	21280	http://www.ebi.ac.uk/QuickGO/GTerm?id=GO:0044441
4	4	primary cilium	GO:0072372	0.0817	0.271	PROM1|0.467;SPTBN5|28.402	2	123	82	21280	http://www.ebi.ac.uk/QuickGO/GTerm?id=GO:0072372
4	4	lamellipodium	GO:0030027	0.0851	0.279	CDH2|1.906;FAT1|0.605	2	126	82	21280	http://www.ebi.ac.uk/QuickGO/GTerm?id=GO:0030027
3	3	intracellular part	GO:0044424	0.087	0.282	RIC3|0.491;NIM1K|1.617;CAV2|0.417;CERS6|0.346;ADAMTS1|1.877;IRF2BP2|1.672;CDH2|1.906;CTSK|2.109;SOD3|0.184;CDO1|0.672;PROM1|0.467;SLC25A25|0.627;CRCP|0.599;ACSL1|0.614;MST1R|1.705;FAT1|0.605;GFRA3|0.646;CHAC1|0.521;EVC|0.468;ECI2|0.596;PANK1|0.639;EGR1|2.376;JUN|2.208;PPARGC1A|0.564;CMAS|0.652;TOP2A|0.53;RARA|1.526;FOS|3.316;HKDC1|2.366;MAOA|0.614;LAP3|0.573;SIK1|1.694;SMC2|0.493;REEP5|0.534;KIAA…	58	13393	82	21280	http://www.ebi.ac.uk/QuickGO/GTerm?id=GO:0044424
5	5	cell projection membrane	GO:0031253	0.0897	0.287	PROM1|0.467;SPTBN5|28.402	2	130	82	21280	http://www.ebi.ac.uk/QuickGO/GTerm?id=GO:0031253
4	4	extrinsic component of plasma membrane	GO:0019897	0.0944	0.298	CAV2|0.417;CDH2|1.906	2	134	82	21280	http://www.ebi.ac.uk/QuickGO/GTerm?id=GO:0019897
3	3	cell projection	GO:0042995	0.0972	0.303	CDH2|1.906;PROM1|0.467;FAT1|0.605;EVC|0.468;LPAR3|2.868;SPTBN5|28.402;EVC2|0.376	7	1018	82	21280	http://www.ebi.ac.uk/QuickGO/GTerm?id=GO:0042995
7	6,7	condensed chromosome	GO:0000793	0.1	0.308	TOP2A|0.53;SMC2|0.493	2	139	82	21280	http://www.ebi.ac.uk/QuickGO/GTerm?id=GO:0000793
3	3	membrane region	GO:0098589	0.101	0.308	CAV2|0.417;CDH2|1.906;PROM1|0.467;SPTBN5|28.402;JAG1|1.703	5	641	82	21280	http://www.ebi.ac.uk/QuickGO/GTerm?id=GO:0098589
2	2	membrane	GO:0016020	0.104	0.311	SIDT1|5.384;RIC3|0.491;LRFN5|1.736;NIM1K|1.617;CAV2|0.417;CERS6|0.346;CDH2|1.906;PROM1|0.467;SLC25A25|0.627;ACSL1|0.614;MST1R|1.705;SLC2A2|0.635;FAT1|0.605;GFRA3|0.646;EVC|0.468;ECI2|0.596;PANK1|0.639;CMAS|0.652;SDK2|2.638;ATP1A1|1.604;CDHR5|0.509;MAOA|0.614;IFI27L2|1.763;TMEM86A|0.582;REEP5|0.534;CCK1R|5.905;KIAA1324|5.521;IRS2|1.866;KL|3.059;AGPAT2|1.693;RNF144A|2.045;LPAR3|2.868;SLC6A14|0.423;…	46	10329	82	21280	http://www.ebi.ac.uk/QuickGO/GTerm?id=GO:0016020
7	5,6,7	rough endoplasmic reticulum	GO:0005791	0.106	0.311	CKAP4|0.609	1	29	82	21280	http://www.ebi.ac.uk/QuickGO/GTerm?id=GO:0005791
2	2	cell part	GO:0044464	0.106	0.311	RIC3|0.491;LRFN5|1.736;NIM1K|1.617;CAV2|0.417;CERS6|0.346;ADAMTS1|1.877;IRF2BP2|1.672;CDH2|1.906;CTSK|2.109;SOD3|0.184;CDO1|0.672;PROM1|0.467;SLC25A25|0.627;CRCP|0.599;ACSL1|0.614;MST1R|1.705;SLC2A2|0.635;FAT1|0.605;GFRA3|0.646;CHAC1|0.521;EVC|0.468;ECI2|0.596;PANK1|0.639;EGR1|2.376;JUN|2.208;PPARGC1A|0.564;CMAS|0.652;TOP2A|0.53;RARA|1.526;SDK2|2.638;ATP1A1|1.604;FOS|3.316;HKDC1|2.366;MAOA|0.614;…	68	16293	82	21280	http://www.ebi.ac.uk/QuickGO/GTerm?id=GO:0044464
5	4,5	photoreceptor connecting cilium	GO:0032391	0.113	0.319	SPTBN5|28.402	1	31	82	21280	http://www.ebi.ac.uk/QuickGO/GTerm?id=GO:0032391
9	6,7,8,9	contractile actin filament bundle	GO:0097517	0.113	0.319	MST1R|1.705	1	31	82	21280	http://www.ebi.ac.uk/QuickGO/GTerm?id=GO:0097517
3	3	basal part of cell	GO:0045178	0.113	0.319	ATP1A1|1.604	1	31	82	21280	http://www.ebi.ac.uk/QuickGO/GTerm?id=GO:0045178
5	5	membrane raft	GO:0045121	0.119	0.326	CAV2|0.417;CDH2|1.906	2	154	82	21280	http://www.ebi.ac.uk/QuickGO/GTerm?id=GO:0045121
3	3	cell division site	GO:0032153	0.12	0.326	MZT1|0.461	1	33	82	21280	http://www.ebi.ac.uk/QuickGO/GTerm?id=GO:0032153
4	3,4	cell division site part	GO:0032155	0.12	0.326	MZT1|0.461	1	33	82	21280	http://www.ebi.ac.uk/QuickGO/GTerm?id=GO:0032155
7	4,6,7	mitochondrial membrane	GO:0031966	0.122	0.326	SLC25A25|0.627;COX7C|0.658;Gga.6352|0.616;PDK4|0.421	4	492	82	21280	http://www.ebi.ac.uk/QuickGO/GTerm?id=GO:0031966
4	4	integral component of membrane	GO:0016021	0.124	0.326	SIDT1|5.384;RIC3|0.491;LRFN5|1.736;NIM1K|1.617;CAV2|0.417;CERS6|0.346;CDH2|1.906;PROM1|0.467;SLC25A25|0.627;MST1R|1.705;SLC2A2|0.635;FAT1|0.605;EVC|0.468;SDK2|2.638;ATP1A1|1.604;MAOA|0.614;IFI27L2|1.763;TMEM86A|0.582;REEP5|0.534;CCK1R|5.905;KIAA1324|5.521;KL|3.059;AGPAT2|1.693;RNF144A|2.045;LPAR3|2.868;SLC6A14|0.423;CRHR2|2.007;COX7C|0.658;SLC5A3|1.572;TRPA1|0.123;EVC2|0.376;JAG1|1.703;RMDN2|0.604	33	7149	82	21280	http://www.ebi.ac.uk/QuickGO/GTerm?id=GO:0016021
4	4	secretory granule	GO:0030141	0.124	0.326	CAV2|0.417;CRCP|0.599	2	158	82	21280	http://www.ebi.ac.uk/QuickGO/GTerm?id=GO:0030141
5	4,5	mitochondrial part	GO:0044429	0.125	0.326	SLC25A25|0.627;CS|1.611;COX7C|0.658;Gga.6352|0.616;PDK4|0.421	5	685	82	21280	http://www.ebi.ac.uk/QuickGO/GTerm?id=GO:0044429
5	3,5	stereocilium	GO:0032420	0.126	0.328	PROM1|0.467	1	35	82	21280	http://www.ebi.ac.uk/QuickGO/GTerm?id=GO:0032420
5	4,5	Golgi apparatus part	GO:0044431	0.129	0.329	CAV2|0.417;SOD3|0.184;CHAC1|0.521;KIAA1324|5.521	4	503	82	21280	http://www.ebi.ac.uk/QuickGO/GTerm?id=GO:0044431
5	5	intercalated disc	GO:0014704	0.13	0.329	CDH2|1.906	1	36	82	21280	http://www.ebi.ac.uk/QuickGO/GTerm?id=GO:0014704
2	2	cell	GO:0005623	0.133	0.333	RIC3|0.491;LRFN5|1.736;NIM1K|1.617;CAV2|0.417;CERS6|0.346;ADAMTS1|1.877;IRF2BP2|1.672;CDH2|1.906;CTSK|2.109;SOD3|0.184;CDO1|0.672;PROM1|0.467;SLC25A25|0.627;CRCP|0.599;ACSL1|0.614;MST1R|1.705;SLC2A2|0.635;FAT1|0.605;GFRA3|0.646;CHAC1|0.521;EVC|0.468;ECI2|0.596;PANK1|0.639;EGR1|2.376;JUN|2.208;PPARGC1A|0.564;CMAS|0.652;TOP2A|0.53;RARA|1.526;SDK2|2.638;ATP1A1|1.604;FOS|3.316;HKDC1|2.366;MAOA|0.614;…	68	16428	82	21280	http://www.ebi.ac.uk/QuickGO/GTerm?id=GO:0005623
2	2	cell junction	GO:0030054	0.134	0.334	CAV2|0.417;CDH2|1.906;FAT1|0.605;SDK2|2.638;LAP3|0.573;JAG1|1.703	6	902	82	21280	http://www.ebi.ac.uk/QuickGO/GTerm?id=GO:0030054
7	3,6,7	mitochondrial nucleoid	GO:0042645	0.137	0.336	Gga.6352|0.616	1	38	82	21280	http://www.ebi.ac.uk/QuickGO/GTerm?id=GO:0042645
3	3	intrinsic component of membrane	GO:0031224	0.138	0.337	SIDT1|5.384;RIC3|0.491;LRFN5|1.736;NIM1K|1.617;CAV2|0.417;CERS6|0.346;CDH2|1.906;PROM1|0.467;SLC25A25|0.627;MST1R|1.705;SLC2A2|0.635;FAT1|0.605;EVC|0.468;SDK2|2.638;ATP1A1|1.604;MAOA|0.614;IFI27L2|1.763;TMEM86A|0.582;REEP5|0.534;CCK1R|5.905;KIAA1324|5.521;KL|3.059;AGPAT2|1.693;RNF144A|2.045;LPAR3|2.868;SLC6A14|0.423;CRHR2|2.007;COX7C|0.658;SLC5A3|1.572;TRPA1|0.123;EVC2|0.376;JAG1|1.703;RMDN2|0.604	33	7224	82	21280	http://www.ebi.ac.uk/QuickGO/GTerm?id=GO:0031224
2	2	nucleoid	GO:0009295	0.143	0.345	Gga.6352|0.616	1	40	82	21280	http://www.ebi.ac.uk/QuickGO/GTerm?id=GO:0009295
6	5,6	mitochondrial envelope	GO:0005740	0.145	0.347	SLC25A25|0.627;COX7C|0.658;Gga.6352|0.616;PDK4|0.421	4	526	82	21280	http://www.ebi.ac.uk/QuickGO/GTerm?id=GO:0005740
6	5,6	lipid particle	GO:0005811	0.147	0.347	CKAP4|0.609	1	41	82	21280	http://www.ebi.ac.uk/QuickGO/GTerm?id=GO:0005811
4	4	ciliary transition zone	GO:0035869	0.16	0.37	SPTBN5|28.402	1	45	82	21280	http://www.ebi.ac.uk/QuickGO/GTerm?id=GO:0035869
4	4	cell-cell contact zone	GO:0044291	0.16	0.37	CDH2|1.906	1	45	82	21280	http://www.ebi.ac.uk/QuickGO/GTerm?id=GO:0044291
9	7,8,9	nuclear speck	GO:0016607	0.161	0.37	HSPB3|1.611;CKAP4|0.609	2	186	82	21280	http://www.ebi.ac.uk/QuickGO/GTerm?id=GO:0016607
5	4,5	secretory granule membrane	GO:0030667	0.166	0.378	CAV2|0.417	1	47	82	21280	http://www.ebi.ac.uk/QuickGO/GTerm?id=GO:0030667
6	5,6	endoplasmic reticulum-Golgi intermediate compartment	GO:0005793	0.169	0.38	PROM1|0.467	1	48	82	21280	http://www.ebi.ac.uk/QuickGO/GTerm?id=GO:0005793
6	6	caveola	GO:0005901	0.173	0.38	CAV2|0.417	1	49	82	21280	http://www.ebi.ac.uk/QuickGO/GTerm?id=GO:0005901
4	4	asymmetric synapse	GO:0032279	0.176	0.38	CDH2|1.906	1	50	82	21280	http://www.ebi.ac.uk/QuickGO/GTerm?id=GO:0032279
3	3	postsynaptic specialization	GO:0099572	0.176	0.38	CDH2|1.906	1	50	82	21280	http://www.ebi.ac.uk/QuickGO/GTerm?id=GO:0099572
3	3	neuron to neuron synapse	GO:0098984	0.176	0.38	CDH2|1.906	1	50	82	21280	http://www.ebi.ac.uk/QuickGO/GTerm?id=GO:0098984
6	5,6	mitochondrial matrix	GO:0005759	0.176	0.38	CS|1.611;Gga.6352|0.616	2	197	82	21280	http://www.ebi.ac.uk/QuickGO/GTerm?id=GO:0005759
8	5,6,7,8	cortical actin cytoskeleton	GO:0030864	0.188	0.402	CDH2|1.906	1	54	82	21280	http://www.ebi.ac.uk/QuickGO/GTerm?id=GO:0030864
2	2	membrane part	GO:0044425	0.189	0.402	SIDT1|5.384;RIC3|0.491;LRFN5|1.736;NIM1K|1.617;CAV2|0.417;CERS6|0.346;CDH2|1.906;PROM1|0.467;SLC25A25|0.627;MST1R|1.705;SLC2A2|0.635;FAT1|0.605;GFRA3|0.646;EVC|0.468;PANK1|0.639;SDK2|2.638;ATP1A1|1.604;MAOA|0.614;IFI27L2|1.763;TMEM86A|0.582;REEP5|0.534;CCK1R|5.905;KIAA1324|5.521;KL|3.059;AGPAT2|1.693;RNF144A|2.045;LPAR3|2.868;SLC6A14|0.423;CRHR2|2.007;COX7C|0.658;SLC5A3|1.572;TRPA1|0.123;SPTBN5|2…	36	8210	82	21280	http://www.ebi.ac.uk/QuickGO/GTerm?id=GO:0044425
7	6,7	heterochromatin	GO:0000792	0.198	0.413	TOP2A|0.53	1	57	82	21280	http://www.ebi.ac.uk/QuickGO/GTerm?id=GO:0000792
7	5,6,7	Golgi subcompartment	GO:0098791	0.198	0.413	SOD3|0.184;CHAC1|0.521;KIAA1324|5.521	3	398	82	21280	http://www.ebi.ac.uk/QuickGO/GTerm?id=GO:0098791
6	5,6	vacuole	GO:0005773	0.201	0.416	CTSK|2.109;MST1R|1.705;KIAA1324|5.521	3	401	82	21280	http://www.ebi.ac.uk/QuickGO/GTerm?id=GO:0005773
4	4	brush border	GO:0005903	0.204	0.418	PROM1|0.467	1	59	82	21280	http://www.ebi.ac.uk/QuickGO/GTerm?id=GO:0005903
3	3	plasma membrane part	GO:0044459	0.208	0.419	CAV2|0.417;CDH2|1.906;PROM1|0.467;GFRA3|0.646;CCK1R|5.905;KIAA1324|5.521;KL|3.059;SLC6A14|0.423;SPTBN5|28.402;JAG1|1.703	10	1932	82	21280	http://www.ebi.ac.uk/QuickGO/GTerm?id=GO:0044459
5	5	microvillus	GO:0005902	0.21	0.419	PROM1|0.467	1	61	82	21280	http://www.ebi.ac.uk/QuickGO/GTerm?id=GO:0005902
5	5	filopodium	GO:0030175	0.21	0.419	FAT1|0.605	1	61	82	21280	http://www.ebi.ac.uk/QuickGO/GTerm?id=GO:0030175
6	4,5,6	Golgi apparatus	GO:0005794	0.212	0.419	CAV2|0.417;SOD3|0.184;CHAC1|0.521;KIAA1324|5.521;RNF144A|2.045;CRHR2|2.007	6	1040	82	21280	http://www.ebi.ac.uk/QuickGO/GTerm?id=GO:0005794
10	6,7,8,9,10	stress fiber	GO:0001725	0.213	0.419	MST1R|1.705	1	62	82	21280	http://www.ebi.ac.uk/QuickGO/GTerm?id=GO:0001725
6	5,6	clathrin coat	GO:0030118	0.219	0.421	PANK1|0.639	1	64	82	21280	http://www.ebi.ac.uk/QuickGO/GTerm?id=GO:0030118
3	3	cell body	GO:0044297	0.221	0.421	RIC3|0.491;CDH2|1.906	2	229	82	21280	http://www.ebi.ac.uk/QuickGO/GTerm?id=GO:0044297
4	3,4	cell projection part	GO:0044463	0.222	0.421	PROM1|0.467;EVC|0.468;SPTBN5|28.402	3	422	82	21280	http://www.ebi.ac.uk/QuickGO/GTerm?id=GO:0044463
5	4,5	respiratory chain complex	GO:0098803	0.222	0.421	COX7C|0.658	1	65	82	21280	http://www.ebi.ac.uk/QuickGO/GTerm?id=GO:0098803
5	4,5	cell-cell adherens junction	GO:0005913	0.222	0.421	CDH2|1.906	1	65	82	21280	http://www.ebi.ac.uk/QuickGO/GTerm?id=GO:0005913
8	5,6,7,8	actin filament bundle	GO:0032432	0.228	0.427	MST1R|1.705	1	67	82	21280	http://www.ebi.ac.uk/QuickGO/GTerm?id=GO:0032432
3	3	cell leading edge	GO:0031252	0.229	0.427	CDH2|1.906;FAT1|0.605	2	235	82	21280	http://www.ebi.ac.uk/QuickGO/GTerm?id=GO:0031252
4	4	mitochondrial respiratory chain	GO:0005746	0.231	0.428	COX7C|0.658	1	68	82	21280	http://www.ebi.ac.uk/QuickGO/GTerm?id=GO:0005746
4	4	actin-based cell projection	GO:0098858	0.237	0.434	FAT1|0.605	1	70	82	21280	http://www.ebi.ac.uk/QuickGO/GTerm?id=GO:0098858
4	4	sarcolemma	GO:0042383	0.24	0.434	CDH2|1.906	1	71	82	21280	http://www.ebi.ac.uk/QuickGO/GTerm?id=GO:0042383
7	6,7	P-body	GO:0000932	0.24	0.434	CKAP4|0.609	1	71	82	21280	http://www.ebi.ac.uk/QuickGO/GTerm?id=GO:0000932
8	5,6,7,8	actomyosin	GO:0042641	0.243	0.436	MST1R|1.705	1	72	82	21280	http://www.ebi.ac.uk/QuickGO/GTerm?id=GO:0042641
6	5,6	nucleoplasm	GO:0005654	0.246	0.439	IRF2BP2|1.672;CRCP|0.599;ECI2|0.596;EGR1|2.376;TOP2A|0.53;FOS|3.316;LAP3|0.573;SGK2|0.559;HSPB3|1.611;MCC|2.125;CKAP4|0.609	11	2249	82	21280	http://www.ebi.ac.uk/QuickGO/GTerm?id=GO:0005654
3	3	extrinsic component of membrane	GO:0019898	0.251	0.444	CAV2|0.417;CDH2|1.906	2	250	82	21280	http://www.ebi.ac.uk/QuickGO/GTerm?id=GO:0019898
5	5	integral component of plasma membrane	GO:0005887	0.253	0.444	CAV2|0.417;PROM1|0.467;CCK1R|5.905;KIAA1324|5.521;KL|3.059;SLC6A14|0.423	6	1105	82	21280	http://www.ebi.ac.uk/QuickGO/GTerm?id=GO:0005887
3	3	neuron part	GO:0097458	0.257	0.446	RIC3|0.491;CDH2|1.906;PROM1|0.467;LPAR3|2.868;SPTBN5|28.402	5	888	82	21280	http://www.ebi.ac.uk/QuickGO/GTerm?id=GO:0097458
7	6,7	cortical cytoskeleton	GO:0030863	0.258	0.446	CDH2|1.906	1	77	82	21280	http://www.ebi.ac.uk/QuickGO/GTerm?id=GO:0030863
3	3	DNA packaging complex	GO:0044815	0.269	0.463	SMC2|0.493	1	81	82	21280	http://www.ebi.ac.uk/QuickGO/GTerm?id=GO:0044815
3	3	respiratory chain	GO:0070469	0.275	0.469	COX7C|0.658	1	83	82	21280	http://www.ebi.ac.uk/QuickGO/GTerm?id=GO:0070469
4	4	intrinsic component of plasma membrane	GO:0031226	0.28	0.476	CAV2|0.417;PROM1|0.467;CCK1R|5.905;KIAA1324|5.521;KL|3.059;SLC6A14|0.423	6	1147	82	21280	http://www.ebi.ac.uk/QuickGO/GTerm?id=GO:0031226
4	4	ciliary basal body	GO:0036064	0.286	0.482	EVC|0.468	1	87	82	21280	http://www.ebi.ac.uk/QuickGO/GTerm?id=GO:0036064
8	5,7,8	recycling endosome	GO:0055037	0.291	0.487	PANK1|0.639	1	89	82	21280	http://www.ebi.ac.uk/QuickGO/GTerm?id=GO:0055037
4	4	basement membrane	GO:0005604	0.299	0.498	ADAMTS1|1.877	1	92	82	21280	http://www.ebi.ac.uk/QuickGO/GTerm?id=GO:0005604
3	3	intracellular	GO:0005622	0.308	0.509	RIC3|0.491;NIM1K|1.617;CAV2|0.417;CERS6|0.346;ADAMTS1|1.877;IRF2BP2|1.672;CDH2|1.906;CTSK|2.109;SOD3|0.184;CDO1|0.672;PROM1|0.467;SLC25A25|0.627;CRCP|0.599;ACSL1|0.614;MST1R|1.705;FAT1|0.605;GFRA3|0.646;CHAC1|0.521;EVC|0.468;ECI2|0.596;PANK1|0.639;EGR1|2.376;JUN|2.208;PPARGC1A|0.564;CMAS|0.652;TOP2A|0.53;RARA|1.526;FOS|3.316;HKDC1|2.366;MAOA|0.614;LAP3|0.573;SIK1|1.694;SMC2|0.493;REEP5|0.534;KIAA…	58	14360	82	21280	http://www.ebi.ac.uk/QuickGO/GTerm?id=GO:0005622
5	4,5	intracellular organelle lumen	GO:0070013	0.326	0.525	IRF2BP2|1.672;CRCP|0.599;ECI2|0.596;EGR1|2.376;JUN|2.208;TOP2A|0.53;FOS|3.316;LAP3|0.573;CS|1.611;SGK2|0.559;Gga.6352|0.616;HSPB3|1.611;MCC|2.125;CKAP4|0.609	14	3152	82	21280	http://www.ebi.ac.uk/QuickGO/GTerm?id=GO:0070013
5	4,5	postsynaptic density	GO:0014069	0.326	0.525	CDH2|1.906	1	102	82	21280	http://www.ebi.ac.uk/QuickGO/GTerm?id=GO:0014069
4	4	membrane microdomain	GO:0098857	0.326	0.525	CDH2|1.906	1	102	82	21280	http://www.ebi.ac.uk/QuickGO/GTerm?id=GO:0098857
3	3	organelle lumen	GO:0043233	0.329	0.525	IRF2BP2|1.672;CRCP|0.599;ECI2|0.596;EGR1|2.376;JUN|2.208;TOP2A|0.53;FOS|3.316;LAP3|0.573;CS|1.611;SGK2|0.559;Gga.6352|0.616;HSPB3|1.611;MCC|2.125;CKAP4|0.609	14	3158	82	21280	http://www.ebi.ac.uk/QuickGO/GTerm?id=GO:0043233
5	4,5	extrinsic component of cytoplasmic side of plasma membrane	GO:0031234	0.329	0.525	CAV2|0.417	1	103	82	21280	http://www.ebi.ac.uk/QuickGO/GTerm?id=GO:0031234
3	3	whole membrane	GO:0098805	0.331	0.525	CAV2|0.417;CDH2|1.906;PROM1|0.467;SPTBN5|28.402;Gga.6352|0.616;JAG1|1.703	6	1222	82	21280	http://www.ebi.ac.uk/QuickGO/GTerm?id=GO:0098805
2	2	membrane-enclosed lumen	GO:0031974	0.334	0.525	IRF2BP2|1.672;CRCP|0.599;ECI2|0.596;EGR1|2.376;JUN|2.208;TOP2A|0.53;FOS|3.316;LAP3|0.573;CS|1.611;SGK2|0.559;Gga.6352|0.616;HSPB3|1.611;MCC|2.125;CKAP4|0.609	14	3171	82	21280	http://www.ebi.ac.uk/QuickGO/GTerm?id=GO:0031974
5	5	basolateral plasma membrane	GO:0016323	0.337	0.525	CDH2|1.906	1	106	82	21280	http://www.ebi.ac.uk/QuickGO/GTerm?id=GO:0016323
7	6,7	RNA polymerase II transcription factor complex	GO:0090575	0.339	0.525	FOS|3.316	1	107	82	21280	http://www.ebi.ac.uk/QuickGO/GTerm?id=GO:0090575
2	2	organelle part	GO:0044422	0.34	0.525	CAV2|0.417;IRF2BP2|1.672;CDH2|1.906;SOD3|0.184;PROM1|0.467;SLC25A25|0.627;CRCP|0.599;MST1R|1.705;CHAC1|0.521;EVC|0.468;ECI2|0.596;EGR1|2.376;JUN|2.208;TOP2A|0.53;FOS|3.316;LAP3|0.573;SMC2|0.493;REEP5|0.534;KIAA1324|5.521;CS|1.611;SGK2|0.559;COX7C|0.658;SPTBN5|28.402;Gga.6352|0.616;HSPB3|1.611;MZT1|0.461;MCC|2.125;PDK4|0.421;CKAP4|0.609	29	6954	82	21280	http://www.ebi.ac.uk/QuickGO/GTerm?id=GO:0044422
3	3	midbody	GO:0030496	0.342	0.525	LAP3|0.573	1	108	82	21280	http://www.ebi.ac.uk/QuickGO/GTerm?id=GO:0030496
3	3	extracellular matrix component	GO:0044420	0.349	0.533	ADAMTS1|1.877	1	111	82	21280	http://www.ebi.ac.uk/QuickGO/GTerm?id=GO:0044420
5	4,5	organelle subcompartment	GO:0031984	0.351	0.533	SOD3|0.184;CHAC1|0.521;REEP5|0.534;KIAA1324|5.521	4	777	82	21280	http://www.ebi.ac.uk/QuickGO/GTerm?id=GO:0031984
3	3	side of membrane	GO:0098552	0.353	0.533	CAV2|0.417;GFRA3|0.646	2	322	82	21280	http://www.ebi.ac.uk/QuickGO/GTerm?id=GO:0098552
8	7,8	lysosome	GO:0005764	0.358	0.536	CTSK|2.109;KIAA1324|5.521	2	326	82	21280	http://www.ebi.ac.uk/QuickGO/GTerm?id=GO:0005764
4	4	inner mitochondrial membrane protein complex	GO:0098800	0.362	0.536	COX7C|0.658	1	116	82	21280	http://www.ebi.ac.uk/QuickGO/GTerm?id=GO:0098800
5	5	mitochondrial outer membrane	GO:0005741	0.362	0.536	Gga.6352|0.616	1	116	82	21280	http://www.ebi.ac.uk/QuickGO/GTerm?id=GO:0005741
7	6,7	lytic vacuole	GO:0000323	0.364	0.536	CTSK|2.109;KIAA1324|5.521	2	330	82	21280	http://www.ebi.ac.uk/QuickGO/GTerm?id=GO:0000323
6	5,6	microtubule organizing center part	GO:0044450	0.369	0.539	MZT1|0.461	1	119	82	21280	http://www.ebi.ac.uk/QuickGO/GTerm?id=GO:0044450
6	5,6	nuclear DNA-directed RNA polymerase complex	GO:0055029	0.374	0.539	CRCP|0.599	1	121	82	21280	http://www.ebi.ac.uk/QuickGO/GTerm?id=GO:0055029
8	5,7,8	late endosome	GO:0005770	0.376	0.539	KIAA1324|5.521	1	122	82	21280	http://www.ebi.ac.uk/QuickGO/GTerm?id=GO:0005770
5	5	DNA-directed RNA polymerase complex	GO:0000428	0.376	0.539	CRCP|0.599	1	122	82	21280	http://www.ebi.ac.uk/QuickGO/GTerm?id=GO:0000428
6	5,6	perinuclear region of cytoplasm	GO:0048471	0.378	0.539	CAV2|0.417;FAT1|0.605	2	340	82	21280	http://www.ebi.ac.uk/QuickGO/GTerm?id=GO:0048471
4	4	RNA polymerase complex	GO:0030880	0.379	0.539	CRCP|0.599	1	123	82	21280	http://www.ebi.ac.uk/QuickGO/GTerm?id=GO:0030880
4	4	organelle outer membrane	GO:0031968	0.386	0.546	Gga.6352|0.616	1	126	82	21280	http://www.ebi.ac.uk/QuickGO/GTerm?id=GO:0031968
4	4	transcription factor complex	GO:0005667	0.39	0.548	JUN|2.208;FOS|3.316	2	349	82	21280	http://www.ebi.ac.uk/QuickGO/GTerm?id=GO:0005667
3	3	outer membrane	GO:0019867	0.396	0.548	Gga.6352|0.616	1	130	82	21280	http://www.ebi.ac.uk/QuickGO/GTerm?id=GO:0019867
4	4	neuron projection	GO:0043005	0.396	0.548	RIC3|0.491;CDH2|1.906;LPAR3|2.868	3	588	82	21280	http://www.ebi.ac.uk/QuickGO/GTerm?id=GO:0043005
3	3	protein-DNA complex	GO:0032993	0.403	0.548	FOS|3.316	1	133	82	21280	http://www.ebi.ac.uk/QuickGO/GTerm?id=GO:0032993
6	5,6	cytoplasmic ribonucleoprotein granule	GO:0036464	0.405	0.548	CKAP4|0.609	1	134	82	21280	http://www.ebi.ac.uk/QuickGO/GTerm?id=GO:0036464
6	5,6	nuclear transcription factor complex	GO:0044798	0.409	0.548	FOS|3.316	1	136	82	21280	http://www.ebi.ac.uk/QuickGO/GTerm?id=GO:0044798
5	4,5	organelle envelope	GO:0031967	0.41	0.548	SLC25A25|0.627;COX7C|0.658;Gga.6352|0.616;PDK4|0.421	4	844	82	21280	http://www.ebi.ac.uk/QuickGO/GTerm?id=GO:0031967
3	3	cell-cell junction	GO:0005911	0.411	0.548	CDH2|1.906;FAT1|0.605	2	364	82	21280	http://www.ebi.ac.uk/QuickGO/GTerm?id=GO:0005911
3	3	envelope	GO:0031975	0.411	0.548	SLC25A25|0.627;COX7C|0.658;Gga.6352|0.616;PDK4|0.421	4	845	82	21280	http://www.ebi.ac.uk/QuickGO/GTerm?id=GO:0031975
3	3	coated membrane	GO:0048475	0.412	0.548	PANK1|0.639	1	137	82	21280	http://www.ebi.ac.uk/QuickGO/GTerm?id=GO:0048475
5	4,5	membrane coat	GO:0030117	0.412	0.548	PANK1|0.639	1	137	82	21280	http://www.ebi.ac.uk/QuickGO/GTerm?id=GO:0030117
6	5,6	cell cortex part	GO:0044448	0.414	0.548	CDH2|1.906	1	138	82	21280	http://www.ebi.ac.uk/QuickGO/GTerm?id=GO:0044448
6	5,6	ribonucleoprotein granule	GO:0035770	0.419	0.55	CKAP4|0.609	1	140	82	21280	http://www.ebi.ac.uk/QuickGO/GTerm?id=GO:0035770
4	4	mitochondrial protein complex	GO:0098798	0.421	0.55	COX7C|0.658	1	141	82	21280	http://www.ebi.ac.uk/QuickGO/GTerm?id=GO:0098798
8	6,7,8	nuclear body	GO:0016604	0.423	0.55	HSPB3|1.611;CKAP4|0.609	2	373	82	21280	http://www.ebi.ac.uk/QuickGO/GTerm?id=GO:0016604
5	5	cytoplasmic region	GO:0099568	0.428	0.554	CDH2|1.906	1	144	82	21280	http://www.ebi.ac.uk/QuickGO/GTerm?id=GO:0099568
5	4,5	cytoplasmic side of plasma membrane	GO:0009898	0.434	0.559	CAV2|0.417	1	147	82	21280	http://www.ebi.ac.uk/QuickGO/GTerm?id=GO:0009898
6	5,6	nuclear lumen	GO:0031981	0.439	0.562	IRF2BP2|1.672;CRCP|0.599;ECI2|0.596;EGR1|2.376;JUN|2.208;TOP2A|0.53;FOS|3.316;LAP3|0.573;SGK2|0.559;HSPB3|1.611;MCC|2.125;CKAP4|0.609	12	2892	82	21280	http://www.ebi.ac.uk/QuickGO/GTerm?id=GO:0031981
7	4,6,7	transport vesicle	GO:0030133	0.445	0.566	CAV2|0.417	1	152	82	21280	http://www.ebi.ac.uk/QuickGO/GTerm?id=GO:0030133
6	5,6	chromatin	GO:0000785	0.446	0.566	JUN|2.208;TOP2A|0.53	2	391	82	21280	http://www.ebi.ac.uk/QuickGO/GTerm?id=GO:0000785
3	3	myelin sheath	GO:0043209	0.454	0.572	LDHB|0.618	1	156	82	21280	http://www.ebi.ac.uk/QuickGO/GTerm?id=GO:0043209
4	3,4	intracellular organelle part	GO:0044446	0.459	0.577	CAV2|0.417;IRF2BP2|1.672;CDH2|1.906;SOD3|0.184;SLC25A25|0.627;CRCP|0.599;MST1R|1.705;CHAC1|0.521;EVC|0.468;ECI2|0.596;EGR1|2.376;JUN|2.208;TOP2A|0.53;FOS|3.316;LAP3|0.573;SMC2|0.493;REEP5|0.534;KIAA1324|5.521;CS|1.611;SGK2|0.559;COX7C|0.658;Gga.6352|0.616;HSPB3|1.611;MZT1|0.461;MCC|2.125;PDK4|0.421;CKAP4|0.609	27	6781	82	21280	http://www.ebi.ac.uk/QuickGO/GTerm?id=GO:0044446
4	4	cytoplasmic side of membrane	GO:0098562	0.462	0.577	CAV2|0.417	1	160	82	21280	http://www.ebi.ac.uk/QuickGO/GTerm?id=GO:0098562
4	4	external side of plasma membrane	GO:0009897	0.464	0.577	GFRA3|0.646	1	161	82	21280	http://www.ebi.ac.uk/QuickGO/GTerm?id=GO:0009897
6	5,6	cytoplasmic vesicle	GO:0031410	0.47	0.579	CAV2|0.417;ADAMTS1|1.877;CRCP|0.599;PANK1|0.639	4	913	82	21280	http://www.ebi.ac.uk/QuickGO/GTerm?id=GO:0031410
6	6	secretory vesicle	GO:0099503	0.47	0.579	CRCP|0.599	1	164	82	21280	http://www.ebi.ac.uk/QuickGO/GTerm?id=GO:0099503
3	3	mitochondrial membrane part	GO:0044455	0.51	0.624	COX7C|0.658	1	184	82	21280	http://www.ebi.ac.uk/QuickGO/GTerm?id=GO:0044455
6	5,6	cytoplasmic vesicle membrane	GO:0030659	0.516	0.628	CAV2|0.417	1	187	82	21280	http://www.ebi.ac.uk/QuickGO/GTerm?id=GO:0030659
4	4	neuronal cell body	GO:0043025	0.52	0.63	RIC3|0.491	1	189	82	21280	http://www.ebi.ac.uk/QuickGO/GTerm?id=GO:0043025
5	4,5	chromosomal part	GO:0044427	0.524	0.632	JUN|2.208;TOP2A|0.53;SMC2|0.493	3	716	82	21280	http://www.ebi.ac.uk/QuickGO/GTerm?id=GO:0044427
4	4	cell cortex	GO:0005938	0.543	0.651	CDH2|1.906	1	202	82	21280	http://www.ebi.ac.uk/QuickGO/GTerm?id=GO:0005938
5	4,5	vesicle membrane	GO:0012506	0.545	0.651	CAV2|0.417	1	203	82	21280	http://www.ebi.ac.uk/QuickGO/GTerm?id=GO:0012506
3	3	organelle membrane	GO:0031090	0.55	0.653	CAV2|0.417;PROM1|0.467;SLC25A25|0.627;COX7C|0.658;SPTBN5|28.402;Gga.6352|0.616;PDK4|0.421	7	1804	82	21280	http://www.ebi.ac.uk/QuickGO/GTerm?id=GO:0031090
6	5,6	nucleus	GO:0005634	0.559	0.661	NIM1K|1.617;CERS6|0.346;IRF2BP2|1.672;CRCP|0.599;FAT1|0.605;ECI2|0.596;PANK1|0.639;EGR1|2.376;JUN|2.208;PPARGC1A|0.564;CMAS|0.652;TOP2A|0.53;RARA|1.526;FOS|3.316;LAP3|0.573;SIK1|1.694;SMC2|0.493;SGK2|0.559;ANKRD6|0.513;EVC2|0.376;DUSP8|1.567;HSPB3|1.611;MCC|2.125;CKAP4|0.609	24	6275	82	21280	http://www.ebi.ac.uk/QuickGO/GTerm?id=GO:0005634
8	5,6,7,8	spindle	GO:0005819	0.573	0.674	MZT1|0.461	1	219	82	21280	http://www.ebi.ac.uk/QuickGO/GTerm?id=GO:0005819
7	4,6,7	endosome	GO:0005768	0.575	0.674	PANK1|0.639;KIAA1324|5.521	2	498	82	21280	http://www.ebi.ac.uk/QuickGO/GTerm?id=GO:0005768
5	5	axon	GO:0030424	0.581	0.676	LPAR3|2.868	1	224	82	21280	http://www.ebi.ac.uk/QuickGO/GTerm?id=GO:0030424
8	6,7,8	nuclear chromatin	GO:0000790	0.582	0.676	JUN|2.208	1	225	82	21280	http://www.ebi.ac.uk/QuickGO/GTerm?id=GO:0000790
5	5	cytoplasmic, membrane-bounded vesicle	GO:0016023	0.586	0.677	CAV2|0.417;CRCP|0.599	2	508	82	21280	http://www.ebi.ac.uk/QuickGO/GTerm?id=GO:0016023
7	5,6,7	nucleoplasm part	GO:0044451	0.594	0.683	CRCP|0.599;HSPB3|1.611;CKAP4|0.609	3	793	82	21280	http://www.ebi.ac.uk/QuickGO/GTerm?id=GO:0044451
6	5,6	chromosome	GO:0005694	0.6	0.686	JUN|2.208;TOP2A|0.53;SMC2|0.493	3	800	82	21280	http://www.ebi.ac.uk/QuickGO/GTerm?id=GO:0005694
7	6,7	actin cytoskeleton	GO:0015629	0.602	0.686	CDH2|1.906;MST1R|1.705	2	523	82	21280	http://www.ebi.ac.uk/QuickGO/GTerm?id=GO:0015629
8	5,6,7,8	microtubule organizing center	GO:0005815	0.61	0.692	EVC|0.468;MZT1|0.461	2	531	82	21280	http://www.ebi.ac.uk/QuickGO/GTerm?id=GO:0005815
6	6	transferase complex, transferring phosphorus-containing groups	GO:0061695	0.615	0.694	CRCP|0.599	1	246	82	21280	http://www.ebi.ac.uk/QuickGO/GTerm?id=GO:0061695
3	3	postsynapse	GO:0098794	0.623	0.7	CDH2|1.906	1	251	82	21280	http://www.ebi.ac.uk/QuickGO/GTerm?id=GO:0098794
4	4	ubiquitin ligase complex	GO:0000151	0.629	0.703	RNF144A|2.045	1	255	82	21280	http://www.ebi.ac.uk/QuickGO/GTerm?id=GO:0000151
5	4,5	nuclear part	GO:0044428	0.653	0.727	IRF2BP2|1.672;CRCP|0.599;ECI2|0.596;EGR1|2.376;JUN|2.208;TOP2A|0.53;FOS|3.316;LAP3|0.573;SGK2|0.559;HSPB3|1.611;MCC|2.125;CKAP4|0.609	12	3345	82	21280	http://www.ebi.ac.uk/QuickGO/GTerm?id=GO:0044428
2	2	synapse	GO:0045202	0.668	0.74	CDH2|1.906;SDK2|2.638	2	590	82	21280	http://www.ebi.ac.uk/QuickGO/GTerm?id=GO:0045202
4	4	bounding membrane of organelle	GO:0098588	0.709	0.782	CAV2|0.417;PROM1|0.467;SPTBN5|28.402;Gga.6352|0.616	4	1236	82	21280	http://www.ebi.ac.uk/QuickGO/GTerm?id=GO:0098588
4	4	somatodendritic compartment	GO:0036477	0.72	0.789	RIC3|0.491	1	327	82	21280	http://www.ebi.ac.uk/QuickGO/GTerm?id=GO:0036477
5	4,5	cytoplasmic vesicle part	GO:0044433	0.723	0.789	CAV2|0.417	1	330	82	21280	http://www.ebi.ac.uk/QuickGO/GTerm?id=GO:0044433
6	5,6	Golgi membrane	GO:0000139	0.725	0.789	CAV2|0.417	1	332	82	21280	http://www.ebi.ac.uk/QuickGO/GTerm?id=GO:0000139
7	5,6,7	nuclear chromosome part	GO:0044454	0.76	0.823	JUN|2.208	1	366	82	21280	http://www.ebi.ac.uk/QuickGO/GTerm?id=GO:0044454
4	4	intracellular vesicle	GO:0097708	0.768	0.828	CRCP|0.599;PANK1|0.639	2	717	82	21280	http://www.ebi.ac.uk/QuickGO/GTerm?id=GO:0097708
5	5	transferase complex	GO:1990234	0.771	0.828	CRCP|0.599;RNF144A|2.045	2	721	82	21280	http://www.ebi.ac.uk/QuickGO/GTerm?id=GO:1990234
6	5,6	nuclear chromosome	GO:0000228	0.782	0.836	JUN|2.208	1	391	82	21280	http://www.ebi.ac.uk/QuickGO/GTerm?id=GO:0000228
6	5,6	endoplasmic reticulum subcompartment	GO:0098827	0.799	0.851	REEP5|0.534	1	412	82	21280	http://www.ebi.ac.uk/QuickGO/GTerm?id=GO:0098827
2	2	synapse part	GO:0044456	0.817	0.863	CDH2|1.906	1	435	82	21280	http://www.ebi.ac.uk/QuickGO/GTerm?id=GO:0044456
9	6,7,8,9	centrosome	GO:0005813	0.817	0.863	MZT1|0.461	1	436	82	21280	http://www.ebi.ac.uk/QuickGO/GTerm?id=GO:0005813
4	3,4	membrane protein complex	GO:0098796	0.844	0.884	CDH2|1.906;PANK1|0.639;COX7C|0.658	3	1189	82	21280	http://www.ebi.ac.uk/QuickGO/GTerm?id=GO:0098796
5	4,5	plasma membrane protein complex	GO:0098797	0.844	0.884	CDH2|1.906	1	476	82	21280	http://www.ebi.ac.uk/QuickGO/GTerm?id=GO:0098797
7	4,5,6,7	cytoskeletal part	GO:0044430	0.876	0.913	CDH2|1.906;MST1R|1.705;EVC|0.468;MZT1|0.461	4	1609	82	21280	http://www.ebi.ac.uk/QuickGO/GTerm?id=GO:0044430
5	4,5	endoplasmic reticulum part	GO:0044432	0.902	0.936	REEP5|0.534	1	592	82	21280	http://www.ebi.ac.uk/QuickGO/GTerm?id=GO:0044432
7	6,7	microtubule cytoskeleton	GO:0015630	0.906	0.937	EVC|0.468;MZT1|0.461	2	1011	82	21280	http://www.ebi.ac.uk/QuickGO/GTerm?id=GO:0015630
[truncated: 8 more rows]

## Sheet: molecular function
Table S3. Complete list of different GO terms between two treatments
maxLevel	levels	GO_Name	GO_ID	Pvalue	Pvalue_adjusted	Genes	Count	Pop_Hit	List_Total	Background_Genes	URL
[truncated: 391 more rows]
