# Supplementary material for: A Novel lncRNA Regulates the Toll-Like Receptor Signaling Pathway and Related Immune Function by Stabilizing FOS mRNA as a Competitive Endogenous RNA
Source: Front Immunol. 2019 Apr 17;10:838. doi: 10.3389/fimmu.2019.00838 (PMC6478817; doi:10.3389/fimmu.2019.00838)
Supplement: Supplementary file 5 [file Table_5.xlsx]

## Sheet: Sheet1
				Table S5. The mRNAs within a 10 kb distance from 31 differential lncRNAs
locus_ID	lncRNA_strand	lncRNA_chr	lncRNA_start	lncRNA_end	gene_ID	gene_chr	gene_strand	gene_start	gene_end	distance
XLOC_010087	+	2	68124818	68181570	ENSGALG00000012888	2	-1	68065225	68124817	1
XLOC_007338	-	14	6407732	6408539	ENSGALG00000005751	14	1	6386668	6407726	6
XLOC_024645	-	8	24011736	24015609	ENSGALG00000010736	8	1	24006797	24011727	9
XLOC_019344	-	4	65550792	65552797	ENSGALG00000013946	4	1	65537526	65550782	10
XLOC_023362	-	7	168137	177695	ENSGALG00000002310	7	1	135531	168113	24
XLOC_019074	-	4	19395096	19406547	ENSGALG00000009212	4	1	19356587	19395067	29
XLOC_018382	+	4	9573122	9598646	ENSGALG00000007240	4	-1	9570163	9573092	30
XLOC_015956	+	3	29121439	29154046	ENSGALG00000010134	3	-1	29026601	29121405	34
XLOC_015269	-	27	4068590	4070540	ENSGALG00000001648	27	1	4053819	4068552	38
XLOC_015889	+	3	17286155	17314230	ENSGALG00000009404	3	-1	17227567	17286101	54
XLOC_015980	+	3	31129798	31154566	ENSGALG00000010551	3	-1	31128989	31129744	54
XLOC_013492	-	21	274068	282884	ENSGALG00000000543	21	1	268938	274009	59
XLOC_025339	-	9	4037479	4045692	ENSGALG00000006488	9	1	3985681	4037412	67
XLOC_007023	+	14	110048	115534	ENSGALG00000002873	14	-1	103100	109981	67
XLOC_019189	-	4	39473073	39498622	ENSGALG00000010674	4	1	39453021	39473004	69
XLOC_014649	-	25	1508657	1511083	ENSGALG00000026565	25	1	1504330	1508584	73
XLOC_027485	+	AADN03017114.1	8736	18711	ENSGALG00000001298	AADN03017114.1	-1	2396	8663	73
XLOC_022358	+	6	32697037	32723509	ENSGALG00000009781	6	1	32421930	32696960	77
XLOC_031410	+	Z	81477291	81482772	ENSGALG00000005423	Z	-1	81471948	81477206	85
XLOC_007361	-	14	7676151	7678283	ENSGALG00000006646	14	1	7628434	7676063	88
XLOC_018391	+	4	10995215	11000603	ENSGALG00000007443	4	-1	10979969	10995125	90
XLOC_005333	+	11	10421290	10429888	ENSGALG00000004951	11	-1	10404154	10421199	91
XLOC_012712	+	20	698619	720437	ENSGALG00000021511	20	-1	650631	698519	100
XLOC_023095	+	7	2207283	2211347	ENSGALG00000002697	7	-1	2200720	2207177	106
XLOC_000593	+	1	76563148	76566225	ENSGALG00000014457	1	-1	76548297	76563040	108
XLOC_020982	-	5	2526808	2634973	ENSGALG00000003777	5	1	2243250	2526700	108
XLOC_016524	-	3	8936540	8942509	ENSGALG00000008931	3	1	8869800	8936431	109
XLOC_020879	+	5	55097047	55110383	ENSGALG00000012025	5	-1	55032527	55096938	109
XLOC_000898	+	1	125932179	125949059	ENSGALG00000027095	1	1	125868713	125932063	116
XLOC_015067	+	27	1244289	1254468	ENSGALG00000001022	27	-1	1236374	1244170	119
XLOC_014564	+	25	1485331	1486823	ENSGALG00000014652	25	-1	1477475	1485201	130
XLOC_015251	-	27	3371049	3390701	ENSGALG00000001162	27	1	3366784	3370919	130
XLOC_000574	+	1	75192298	75198800	ENSGALG00000014331	1	-1	75178046	75192167	131
XLOC_018575	+	4	38809988	38814618	ENSGALG00000010614	4	-1	38807037	38809857	131
XLOC_025273	+	9	21844949	21871861	ENSGALG00000009580	9	-1	21810250	21844816	133
XLOC_004573	+	10	11632322	11634174	ENSGALG00000006388	10	-1	11600710	11632184	138
XLOC_022206	+	6	17137457	17147540	ENSGALG00000005795	6	-1	17129992	17137315	142
XLOC_009960	+	2	48250090	48255499	ENSGALG00000012184	2	-1	48103440	48249944	146
XLOC_005582	-	11	17375364	17377089	ENSGALG00000005791	11	1	17334739	17375214	150
XLOC_024170	+	8	6609820	6627178	ENSGALG00000025650	8	-1	6609347	6609668	152
XLOC_001698	-	1	61060002	61063451	ENSGALG00000012998	1	1	61044205	61059847	155
XLOC_004838	-	10	16449766	16482554	ENSGALG00000007057	10	1	16399899	16449605	161
XLOC_015506	+	28	3613873	3625361	ENSGALG00000003304	28	-1	3581307	3613712	161
XLOC_000546	+	1	71571707	71574229	ENSGALG00000013911	1	-1	71546272	71571545	162
XLOC_001467	-	1	34030152	34035406	ENSGALG00000026661	1	1	33949839	34029987	165
XLOC_015883	+	3	16952311	16957654	ENSGALG00000009330	3	-1	16947714	16952145	166
XLOC_030970	+	Z	424797	430763	ENSGALG00000027116	Z	-1	409420	424622	175
XLOC_014300	+	24	5104472	5105852	ENSGALG00000007109	24	-1	5102812	5104283	189
XLOC_024340	+	8	24165942	24168194	ENSGALG00000010798	8	-1	24157606	24165747	195
XLOC_001153	+	1	178836010	178841845	ENSGALG00000026507	1	-1	178819330	178835807	203
XLOC_023399	-	7	5374767	5418034	ENSGALG00000028684	7	1	5374403	5374564	203
XLOC_014746	+	26	1346150	1354887	ENSGALG00000000401	26	1	1342854	1345933	217
XLOC_021389	-	5	53195172	53219151	ENSGALG00000011827	5	1	53168781	53194954	218
XLOC_022436	-	6	10305601	10316681	ENSGALG00000004073	6	1	10248739	10305381	220
XLOC_001290	-	1	421596	423181	ENSGALG00000026110	1	1	179394	421343	253
XLOC_020829	+	5	49552192	49562869	ENSGALG00000011376	5	-1	49550497	49551932	260
XLOC_006067	-	12	2745171	2748975	ENSGALG00000002459	12	1	2743055	2744903	268
XLOC_025067	+	9	3078197	3084348	ENSGALG00000006680	9	-1	3054489	3077927	270
XLOC_025138	+	9	9737047	9740454	ENSGALG00000002850	9	1	9694581	9736770	277
XLOC_018542	+	4	33891570	33897192	ENSGALG00000010209	4	-1	33880612	33891275	295
XLOC_018776	+	4	73165763	73174824	ENSGALG00000014386	4	1	73142031	73165468	295
XLOC_000035	+	1	3135700	3146108	ENSGALG00000006356	1	-1	3037736	3135404	296
XLOC_007738	+	15	8042340	8070844	ENSGALG00000021126	15	1	8034378	8042034	306
XLOC_027759	+	AADN03018455.1	3517	5073	ENSGALG00000026872	AADN03018455.1	-1	78	3210	307
XLOC_004556	+	10	10220821	10231923	ENSGALG00000021253	10	-1	10218393	10220507	314
XLOC_008865	-	18	4034651	4039683	ENSGALG00000001725	18	1	4000420	4034329	322
XLOC_014032	-	23	200253	202452	ENSGALG00000000509	23	1	188096	199912	341
XLOC_030716	+	JH376377.1	19117	26845	ENSGALG00000025854	JH376377.1	1	17658	18765	352
XLOC_020750	+	5	37557220	37558975	ENSGALG00000028515	5	-1	37556762	37556861	359
XLOC_020941	-	5	426670	428182	ENSGALG00000005202	5	1	412964	426301	369
XLOC_004739	-	10	3406523	3420800	ENSGALG00000003336	10	1	3366148	3406151	372
XLOC_030559	+	JH376272.1	4668	7104	ENSGALG00000026855	JH376272.1	1	2563	4296	372
XLOC_015429	+	28	1742893	1745327	ENSGALG00000001571	28	-1	1729378	1742502	391
XLOC_030718	+	JH376377.1	50316	51714	ENSGALG00000026880	JH376377.1	-1	46166	49897	419
XLOC_014764	+	26	2147228	2156437	ENSGALG00000000701	26	-1	2138284	2146798	430
XLOC_012965	-	20	5712952	5727806	ENSGALG00000004170	20	1	5699881	5712513	439
XLOC_025516	-	9	22248518	22252877	ENSGALG00000009699	9	1	22236549	22248075	443
XLOC_030830	+	LGE22C19W28_E50C23	908499	910589	ENSGALG00000004866	LGE22C19W28_E50C23	1	904340	908031	468
XLOC_021099	-	5	16270057	16275158	ENSGALG00000007330	5	-1	16245180	16269584	473
XLOC_025136	+	9	9525514	9530342	ENSGALG00000002958	9	-1	9405232	9525036	478
XLOC_022370	+	6	34790643	34810442	ENSGALG00000010500	6	-1	34788047	34790162	481
XLOC_029314	+	AADN03026431.1	2651	4051	ENSGALG00000026967	AADN03026431.1	-1	437	2170	481
XLOC_020951	-	5	517649	537920	ENSGALG00000026394	5	1	507411	517159	490
XLOC_014639	-	25	1298489	1299404	ENSGALG00000025924	25	-1	1295145	1297990	499
XLOC_009298	-	19	492493	493765	ENSGALG00000018344	19	-1	491906	491993	500
XLOC_015641	-	28	3654429	3655596	ENSGALG00000026146	28	1	3651445	3653912	517
XLOC_014090	-	23	2500647	2504816	ENSGALG00000001283	23	-1	2483363	2500074	573
XLOC_009956	+	2	47616029	47621287	ENSGALG00000012149	2	1	47596636	47615449	580
XLOC_013847	-	22	2751242	2753577	ENSGALG00000003764	22	-1	2742805	2750654	588
XLOC_020880	+	5	55154952	55163772	ENSGALG00000012037	5	-1	55110398	55154352	600
XLOC_009741	+	2	12910820	12925280	ENSGALG00000007076	2	-1	12793547	12910204	616
XLOC_029969	+	JH375605.1	2718	3307	ENSGALG00000029062	JH375605.1	1	21	2073	645
XLOC_025451	-	9	15171235	15183890	ENSGALG00000008283	9	1	15165312	15170586	649
XLOC_002472	-	1	192067241	192068369	ENSGALG00000027901	1	-1	192066183	192066590	651
XLOC_018428	+	4	14201271	14206946	ENSGALG00000008404	4	-1	14186414	14200592	679
XLOC_004904	-	10	19844277	19846439	ENSGALG00000008600	10	1	19800890	19843598	679
XLOC_010112	+	2	78212513	78218632	ENSGALG00000027521	2	-1	78170628	78211788	725
XLOC_004575	+	10	11718823	11727326	ENSGALG00000006399	10	-1	11717025	11718092	731
XLOC_008321	+	17	6239052	6240219	ENSGALG00000003732	17	-1	6234769	6238321	731
XLOC_024247	+	8	15276342	15283084	ENSGALG00000008680	8	1	15253516	15275599	743
XLOC_020583	+	5	17718601	17738295	ENSGALG00000028582	5	-1	17708714	17717820	781
XLOC_016291	+	3	80894751	80898212	ENSGALG00000015916	3	1	80868242	80893961	790
XLOC_020575	+	5	16623168	16826480	ENSGALG00000027034	5	1	16622191	16622361	807
XLOC_008692	+	18	4257057	4262415	ENSGALG00000001805	18	1	4235780	4256232	825
XLOC_031089	+	Z	15819830	15878784	ENSGALG00000028394	Z	1	15818871	15818979	851
XLOC_007883	-	15	5798643	5802231	ENSGALG00000004412	15	-1	5792725	5797773	870
XLOC_013056	-	20	11223329	11230531	ENSGALG00000007439	20	1	11217491	11222441	888
XLOC_031370	+	Z	70772711	70774543	ENSGALG00000002142	Z	-1	70690620	70771810	901
XLOC_005899	+	12	4566790	4578192	ENSGALG00000004937	12	-1	4486143	4565885	905
XLOC_016567	-	3	14450989	14639505	ENSGALG00000008830	3	-1	14447219	14450083	906
XLOC_031422	-	Z	963275	984060	ENSGALG00000002805	Z	-1	942435	962360	915
XLOC_025442	-	9	14858689	14867890	ENSGALG00000007752	9	1	14845862	14857745	944
XLOC_016965	-	3	78902367	78915353	ENSGALG00000015880	3	1	78877354	78901407	960
XLOC_023107	+	7	4383785	4391990	ENSGALG00000003578	7	-1	4333468	4382817	968
XLOC_027104	+	AADN03015172.1	9788	14614	ENSGALG00000027417	AADN03015172.1	-1	88	8785	1003
XLOC_022249	+	6	21704095	21710536	ENSGALG00000007489	6	-1	21690899	21703073	1022
XLOC_014414	-	24	5429044	5430212	ENSGALG00000024075	24	1	5424232	5428001	1043
XLOC_018870	+	4	88197014	88201695	ENSGALG00000015996	4	-1	88189460	88195969	1045
XLOC_009385	-	19	5833290	5856315	ENSGALG00000027680	19	-1	5830644	5832205	1085
XLOC_025460	-	9	15414539	15415562	ENSGALG00000026983	9	-1	15406844	15413438	1101
XLOC_008487	-	17	6742754	6746547	ENSGALG00000003500	17	-1	6723918	6741651	1103
XLOC_030634	+	JH376312.1	3150	8084	ENSGALG00000027478	JH376312.1	1	838	2031	1119
XLOC_025365	-	9	4800151	4808694	ENSGALG00000020986	9	1	4797355	4799022	1129
XLOC_021260	-	5	36895152	36898357	ENSGALG00000010167	5	1	36884690	36894010	1142
XLOC_001538	-	1	47778462	47784930	ENSGALG00000011724	1	1	47762314	47777315	1147
XLOC_006141	-	12	9295105	9298230	ENSGALG00000021866	12	-1	9283623	9293938	1167
XLOC_001397	-	1	20038845	20044125	ENSGALG00000008705	1	1	20004478	20037661	1184
XLOC_031313	+	Z	59171887	59175608	ENSGALG00000025915	Z	1	59156360	59170693	1194
XLOC_020636	+	5	23838026	23854258	ENSGALG00000008569	5	1	23819875	23836825	1201
XLOC_007028	+	14	860299	863408	ENSGALG00000021314	14	-1	836129	859080	1219
XLOC_000234	+	1	43177216	43201301	ENSGALG00000011207	1	-1	43171637	43175978	1238
XLOC_018569	+	4	38433608	38434584	ENSGALG00000025163	4	1	38434799	38434868	1260
XLOC_023273	+	7	21999029	22001710	ENSGALG00000011402	7	-1	21991654	21997765	1264
XLOC_009443	-	19	9103110	9110278	ENSGALG00000005668	19	1	9094394	9101824	1286
XLOC_000628	+	1	78530675	78534300	ENSGALG00000014779	1	1	78440966	78529387	1288
XLOC_015791	+	3	4462805	4486565	ENSGALG00000008708	3	-1	4440835	4461503	1302
XLOC_018715	+	4	60940438	60945239	ENSGALG00000013468	4	1	60925661	60939133	1305
XLOC_019042	-	4	15847278	15852420	ENSGALG00000008512	4	-1	15700804	15845955	1323
XLOC_025049	+	9	908716	910564	ENSGALG00000001995	9	-1	884376	907393	1323
XLOC_016059	+	3	41475614	41506216	ENSGALG00000011329	3	-1	41393868	41474285	1329
XLOC_014356	-	24	1582191	1585726	ENSGALG00000001331	24	1	1570927	1580862	1329
XLOC_031571	-	Z	22357512	22359985	ENSGALG00000004491	Z	1	22311152	22356168	1344
XLOC_021069	-	5	14069072	14075617	ENSGALG00000006697	5	1	14042659	14067726	1346
XLOC_016531	-	3	9618688	9639861	ENSGALG00000027096	3	1	9612812	9617312	1376
XLOC_020911	+	5	58121873	58137433	ENSGALG00000012408	5	1	58108786	58120487	1386
XLOC_021197	-	5	27599887	27613669	ENSGALG00000025314	5	1	27598380	27598468	1419
XLOC_010504	-	2	5712891	5721414	ENSGALG00000006153	2	-1	5692041	5711470	1421
XLOC_015771	+	3	3274214	3276471	ENSGALG00000008364	3	-1	3272029	3272781	1433
XLOC_020677	+	5	27599922	27613669	ENSGALG00000025314	5	1	27598380	27598468	1454
XLOC_030880	+	LGE64	280720	285210	ENSGALG00000009220	LGE64	1	274275	279266	1454
XLOC_001087	+	1	169435840	169451326	ENSGALG00000017018	1	-1	169393304	169434359	1481
XLOC_030094	+	JH375704.1	3408	4553	ENSGALG00000027105	JH375704.1	-1	21	1913	1495
XLOC_000323	+	1	50461142	50471339	ENSGALG00000012135	1	-1	50456693	50459626	1516
XLOC_018581	+	4	39235573	39248765	ENSGALG00000010658	4	1	39225937	39234039	1534
XLOC_029930	+	JH375571.1	3651	4918	ENSGALG00000026521	JH375571.1	1	86	2102	1549
XLOC_028734	+	AADN03023521.1	11869	16724	ENSGALG00000024401	AADN03023521.1	-1	7797	10318	1551
XLOC_013084	-	20	13774543	13791351	ENSGALG00000007989	20	1	13752745	13772968	1575
XLOC_000488	+	1	65272451	65279201	ENSGALG00000013143	1	1	65036282	65270875	1576
XLOC_020944	-	5	450457	451773	ENSGALG00000005192	5	-1	445428	448856	1601
XLOC_018835	+	4	83481167	83494693	ENSGALG00000015710	4	1	83472173	83479539	1628
XLOC_021096	-	5	16155933	16158785	ENSGALG00000007220	5	-1	16149680	16154242	1691
XLOC_012740	+	20	3652151	3735073	ENSGALG00000003494	20	1	3645759	3650443	1708
XLOC_012968	-	20	5779490	5791672	ENSGALG00000004285	20	-1	5763173	5777781	1709
XLOC_015822	+	3	9418903	9424827	ENSGALG00000008858	3	1	9406399	9417141	1762
XLOC_016527	-	3	9418903	9422410	ENSGALG00000008858	3	1	9406399	9417141	1762
XLOC_024399	-	8	1291256	1302321	ENSGALG00000002001	8	1	1264534	1289487	1769
XLOC_006801	-	13	15222143	15227967	ENSGALG00000006462	13	1	15204804	15220361	1782
XLOC_012759	+	20	5514575	5515913	ENSGALG00000004028	20	1	5499775	5512785	1790
XLOC_014510	+	25	463656	466538	ENSGALG00000000576	25	-1	459758	461809	1847
XLOC_000166	+	1	30615013	30668434	ENSGALG00000009638	1	1	30541566	30613151	1862
XLOC_008398	-	17	373048	374283	ENSGALG00000009090	17	-1	355265	371182	1866
XLOC_015773	+	3	3299428	3308146	ENSGALG00000018733	3	1	3296282	3297536	1892
XLOC_024347	+	8	24749265	24753746	ENSGALG00000010853	8	-1	24731782	24747335	1930
XLOC_007346	-	14	6860879	6862850	ENSGALG00000006068	14	1	6817682	6858942	1937
XLOC_019070	-	4	18018043	18030462	ENSGALG00000009139	4	-1	18006592	18016098	1945
XLOC_026744	-	AADN03013310.1	1	731	ENSGALG00000026403	AADN03013310.1	1	859	1959	1958
XLOC_024242	+	8	15139408	15145036	ENSGALG00000008661	8	-1	15135794	15137430	1978
XLOC_007405	-	14	12410577	12417608	ENSGALG00000028469	14	-1	12405476	12408576	2001
XLOC_030723	-	JH376377.1	65424	66395	ENSGALG00000002779	JH376377.1	-1	52407	63375	2049
XLOC_029888	-	JH375544.1	7237	8259	ENSGALG00000013827	JH375544.1	1	2180	5143	2094
XLOC_024658	-	8	24645543	24652051	ENSGALG00000010818	8	-1	24600649	24643425	2118
XLOC_010771	-	2	44962052	44969972	ENSGALG00000011954	2	1	44956594	44959909	2143
XLOC_015092	+	27	2758319	2760719	ENSGALG00000000525	27	1	2727437	2756153	2166
XLOC_029918	+	JH375561.1	51247	52692	ENSGALG00000028678	JH375561.1	-1	42148	49075	2172
XLOC_008217	+	17	40323	81510	ENSGALG00000014171	17	-1	1663	38146	2177
XLOC_008986	-	18	10956753	10960373	ENSGALG00000007971	18	-1	10947891	10954469	2284
XLOC_015266	-	27	4041898	4044751	ENSGALG00000001624	27	-1	4035541	4039608	2290
XLOC_023607	-	7	29176631	29187526	ENSGALG00000012166	7	1	29157969	29174332	2299
XLOC_016051	+	3	40180481	40201850	ENSGALG00000011182	3	1	40170700	40178161	2320
XLOC_010298	+	2	114983465	114988660	ENSGALG00000028316	2	-1	114981050	114981128	2337
XLOC_029851	+	JH375512.1	7912	8357	ENSGALG00000028161	JH375512.1	1	4408	5547	2365
XLOC_024631	-	8	23172371	23186273	ENSGALG00000010570	8	1	23159775	23170004	2367
XLOC_011193	-	2	126931535	126952000	ENSGALG00000022789	2	1	126740060	126929143	2392
XLOC_016493	-	3	3299939	3314075	ENSGALG00000018733	3	1	3296282	3297536	2403
XLOC_006744	-	13	10266606	10308579	ENSGALG00000003699	13	1	10000421	10264193	2413
XLOC_016418	+	3	105332543	105336268	ENSGALG00000026301	3	1	105319047	105330113	2430
XLOC_031090	+	Z	15821510	15824281	ENSGALG00000028394	Z	1	15818871	15818979	2531
XLOC_013970	+	23	3616985	3618174	ENSGALG00000021644	23	1	3607505	3614453	2532
XLOC_009145	+	19	4087663	4094210	ENSGALG00000001807	19	1	3879653	4085026	2637
XLOC_025343	-	9	4110255	4117808	ENSGALG00000006453	9	-1	4096869	4107617	2638
XLOC_024550	-	8	14679974	14736363	ENSGALG00000006252	8	-1	14657096	14677322	2652
XLOC_014964	-	26	5129464	5131237	ENSGALG00000023760	26	-1	5122698	5126812	2652
XLOC_015449	+	28	2253615	2263657	ENSGALG00000028081	28	-1	2233927	2250905	2710
XLOC_010320	+	2	120087289	120135939	ENSGALG00000022798	2	-1	120078298	120084550	2739
XLOC_021257	-	5	36519882	36570034	ENSGALG00000010137	5	1	36464047	36517135	2747
XLOC_002021	-	1	103446563	103457368	ENSGALG00000015828	1	1	103417900	103443811	2752
XLOC_031408	+	Z	81435063	81435988	ENSGALG00000028340	Z	-1	81430178	81432284	2779
XLOC_031454	-	Z	8227892	8236122	ENSGALG00000028256	Z	-1	8222635	8225085	2807
XLOC_002417	-	1	180178739	180193897	ENSGALG00000017173	1	1	180048263	180175926	2813
XLOC_009881	+	2	35777284	35779625	ENSGALG00000011254	2	-1	35683544	35774433	2851
XLOC_020912	+	5	58145342	58147644	ENSGALG00000012414	5	-1	58139093	58142429	2913
XLOC_005604	-	11	18333384	18336726	ENSGALG00000026544	11	1	18329155	18330450	2934
XLOC_018920	-	4	1963630	1967942	ENSGALG00000004908	4	1	1950342	1960665	2965
XLOC_004493	+	10	3409133	3410451	ENSGALG00000003336	10	1	3366148	3406151	2982
XLOC_000104	+	1	15057071	15060478	ENSGALG00000028853	1	1	14916517	15054085	2986
XLOC_022160	+	6	11093883	11095545	ENSGALG00000004446	6	-1	11086623	11090853	3030
XLOC_009804	+	2	22965975	22967962	ENSGALG00000009476	2	-1	22843081	22962940	3035
XLOC_007243	+	14	15114723	15116201	ENSGALG00000026717	14	1	15101013	15111601	3122
XLOC_000169	+	1	30962116	30963417	ENSGALG00000025619	1	1	30965098	30965257	3141
XLOC_027921	+	AADN03019214.1	1065	2486	ENSGALG00000028170	AADN03019214.1	1	3138	4247	3182
XLOC_009650	+	2	475720	477597	ENSGALG00000019713	2	1	467315	472506	3214
XLOC_010281	+	2	111737099	111741356	ENSGALG00000015432	2	-1	111724629	111733836	3263
XLOC_014841	-	26	173576	181479	ENSGALG00000000826	26	1	159809	170262	3314
XLOC_019217	-	4	45782635	45802606	ENSGALG00000011165	4	1	45743706	45779300	3335
XLOC_018890	-	4	372928	375878	ENSGALG00000004599	4	-1	360637	369568	3360
XLOC_001119	+	1	174366560	174399437	ENSGALG00000017079	1	-1	174350051	174363188	3372
XLOC_016620	-	3	21163858	21173088	ENSGALG00000009816	3	1	21157448	21160434	3424
XLOC_021058	-	5	13133238	13138870	ENSGALG00000006552	5	1	13125200	13129792	3446
XLOC_018299	+	4	1624643	1625279	ENSGALG00000025935	4	-1	1617016	1621171	3472
XLOC_011042	-	2	100464354	100471767	ENSGALG00000014793	2	1	100436019	100460793	3561
XLOC_004498	+	10	3643424	3647628	ENSGALG00000003487	10	-1	3618218	3639760	3664
XLOC_020794	+	5	44099509	44101415	ENSGALG00000010811	5	-1	44071053	44095822	3687
XLOC_010245	+	2	103980820	104009721	ENSGALG00000015124	2	-1	103913222	103977131	3689
XLOC_009184	+	19	5443372	5446262	ENSGALG00000003072	19	1	5418178	5439677	3695
XLOC_007782	+	15	9960301	9970212	ENSGALG00000007512	15	-1	9923585	9956603	3698
XLOC_008364	+	17	8434364	8442441	ENSGALG00000001434	17	-1	8422956	8430634	3730
XLOC_013436	+	21	4235507	4244841	ENSGALG00000003636	21	1	4229458	4231641	3866
XLOC_031427	-	Z	1814432	1819664	ENSGALG00000001843	Z	1	1785433	1810495	3937
XLOC_011078	-	2	103981104	104009721	ENSGALG00000015124	2	-1	103913222	103977131	3973
XLOC_015435	+	28	1936523	1950830	ENSGALG00000000812	28	-1	1930170	1932508	4015
XLOC_006783	-	13	13681150	13684088	ENSGALG00000018624	13	-1	13676142	13677119	4031
XLOC_008008	-	15	12202256	12205517	ENSGALG00000008246	15	-1	12197004	12198222	4034
XLOC_018848	+	4	85064921	85066570	ENSGALG00000022950	4	1	85059990	85060874	4047
XLOC_026222	+	AADN03010814.1	18	2969	ENSGALG00000007197	AADN03010814.1	-1	3080	4087	4069
XLOC_021419	-	5	56161868	56173057	ENSGALG00000012173	5	-1	56155603	56157659	4209
XLOC_000124	+	1	20134813	20139157	ENSGALG00000008635	1	-1	20126933	20130565	4248
XLOC_021234	-	5	32803640	32805867	ENSGALG00000009853	5	1	32806683	32807906	4266
XLOC_022192	+	6	16136670	16139389	ENSGALG00000005469	6	1	16127455	16132383	4287
XLOC_016534	-	3	9866765	9886944	ENSGALG00000008783	3	-1	9851203	9862474	4291
XLOC_015310	-	27	4890901	4895976	ENSGALG00000003282	27	-1	4875164	4886606	4295
XLOC_000744	+	1	94639762	94710961	ENSGALG00000015506	1	1	94474405	94635350	4412
XLOC_000573	+	1	75123607	75142402	ENSGALG00000013420	1	1	75109437	75119160	4447
XLOC_008438	-	17	2450470	2451199	ENSGALG00000007196	17	1	2439728	2445965	4505
XLOC_009653	+	2	527961	529104	ENSGALG00000028985	2	-1	529829	532519	4558
XLOC_025103	+	9	4736154	4742879	ENSGALG00000005554	9	-1	4729436	4731573	4581
XLOC_030841	-	LGE22C19W28_E50C23	126984	128305	ENSGALG00000006075	LGE22C19W28_E50C23	1	129652	131580	4596
XLOC_007233	+	14	14818929	14819509	ENSGALG00000002119	14	-1	14758546	14814317	4612
XLOC_008504	-	17	7214512	7218300	ENSGALG00000017909	17	-1	7209751	7209878	4634
XLOC_012748	+	20	5042314	5055910	ENSGALG00000003670	20	-1	5036695	5037630	4684
XLOC_008881	-	18	4667706	4677293	ENSGALG00000002278	18	-1	4641156	4662985	4721
XLOC_030443	-	JH376162.1	92	1277	ENSGALG00000028609	JH376162.1	-1	3606	4828	4736
XLOC_019303	-	4	59670692	59681504	ENSGALG00000012271	4	1	59638502	59665944	4748
XLOC_031250	+	Z	47099559	47113902	ENSGALG00000000255	Z	-1	46975527	47094809	4750
XLOC_031850	-	Z	72763737	72766049	ENSGALG00000002345	Z	1	72756345	72758979	4758
XLOC_015759	+	3	2862242	2864709	ENSGALG00000027632	3	-1	2811632	2857436	4806
XLOC_007909	-	15	6790937	6791739	ENSGALG00000013851	15	1	6740059	6786099	4838
XLOC_000984	+	1	138000707	138014468	ENSGALG00000016839	1	-1	137992924	137995864	4843
XLOC_000809	+	1	108315957	108317806	ENSGALG00000016144	1	-1	108297493	108311113	4844
XLOC_005378	+	11	17094157	17097346	ENSGALG00000005744	11	1	17081811	17089288	4869
XLOC_008252	+	17	1878813	1882492	ENSGALG00000008586	17	-1	1871842	1873939	4874
XLOC_000083	+	1	12761867	12777163	ENSGALG00000008285	1	-1	12737151	12756983	4884
XLOC_005562	-	11	14856030	14863463	ENSGALG00000013486	11	1	14841774	14851101	4929
XLOC_001369	-	1	14351730	14354403	ENSGALG00000008060	1	1	14328390	14346800	4930
XLOC_016722	-	3	35085556	35088836	ENSGALG00000010748	3	-1	35065030	35080589	4967
XLOC_014357	-	24	1585857	1593360	ENSGALG00000001331	24	1	1570927	1580862	4995
XLOC_016371	+	3	101921876	101945168	ENSGALG00000016491	3	-1	101880367	101916760	5116
XLOC_017058	-	3	101921876	101947781	ENSGALG00000016491	3	-1	101880367	101916760	5116
XLOC_001280	+	1	195073601	195076361	ENSGALG00000022696	1	1	195076942	195078728	5127
XLOC_020821	+	5	48453687	48455898	ENSGALG00000011220	5	-1	48441122	48448485	5202
XLOC_000172	+	1	31069944	31091585	ENSGALG00000009730	1	-1	31044183	31064734	5210
XLOC_001453	-	1	31069982	31089034	ENSGALG00000009730	1	-1	31044183	31064734	5248
XLOC_009220	+	19	6607888	6609833	ENSGALG00000004519	19	1	6592915	6602620	5268
XLOC_011210	-	2	128513244	128518700	ENSGALG00000028918	2	-1	128505590	128507895	5349
XLOC_031522	-	Z	15824408	15847797	ENSGALG00000028394	Z	1	15818871	15818979	5429
XLOC_016082	+	3	45196895	45210125	ENSGALG00000011673	3	1	45190578	45191444	5451
XLOC_007777	+	15	9760084	9794775	ENSGALG00000007388	15	-1	9728774	9754570	5514
XLOC_010438	+	2	145887872	145984181	ENSGALG00000027029	2	1	145880588	145882339	5533
XLOC_029994	-	JH375628.1	345	1825	ENSGALG00000025711	JH375628.1	-1	3702	5907	5562
XLOC_020675	+	5	27579568	27596064	ENSGALG00000009474	5	1	27492491	27573996	5572
XLOC_025525	-	9	22840905	22842441	ENSGALG00000010357	9	-1	22832785	22835332	5573
XLOC_029768	-	JH375424.1	46	1458	ENSGALG00000022202	JH375424.1	-1	3924	5696	5650
XLOC_015443	+	28	2145521	2147903	ENSGALG00000001035	28	-1	2133083	2139829	5692
XLOC_000422	+	1	56958588	56983228	ENSGALG00000012852	1	-1	56931062	56952880	5708
XLOC_026219	+	AADN03010811.1	2	3757	ENSGALG00000007229	AADN03010811.1	1	4028	5725	5723
XLOC_012713	+	20	799662	804343	ENSGALG00000001420	20	-1	731978	793938	5724
XLOC_025260	+	9	20582143	20583572	ENSGALG00000017374	9	1	20586079	20587887	5744
XLOC_006613	+	13	16190703	16201495	ENSGALG00000021104	13	1	16146829	16184900	5803
XLOC_000858	+	1	117649902	117664284	ENSGALG00000016327	1	-1	117626395	117644091	5811
XLOC_007041	+	14	1783001	1788577	ENSGALG00000003640	14	1	1725488	1777183	5818
XLOC_016854	-	3	57081225	57111087	ENSGALG00000014004	3	1	56980129	57075289	5936
XLOC_006044	-	12	1677214	1678616	ENSGALG00000028742	12	-1	1681097	1683191	5977
XLOC_025315	-	9	1247123	1281085	ENSGALG00000002155	9	-1	1075334	1241140	5983
XLOC_001298	-	1	733858	743102	ENSGALG00000026181	1	1	710117	727850	6008
XLOC_013485	-	21	119771	121821	ENSGALG00000025754	21	1	125749	125811	6040
XLOC_006049	-	12	2276952	2278757	ENSGALG00000002398	12	-1	2221688	2270861	6091
XLOC_008851	-	18	2803455	2805276	ENSGALG00000001371	18	1	2773029	2797359	6096
XLOC_021446	-	5	58022023	58023484	ENSGALG00000012396	5	1	58013090	58015823	6200
XLOC_025827	-	AADN03009292.1	40	1984	ENSGALG00000026026	AADN03009292.1	-1	4675	6321	6281
XLOC_030845	-	LGE22C19W28_E50C23	235542	240701	ENSGALG00000006163	LGE22C19W28_E50C23	-1	218464	229189	6353
XLOC_005286	+	11	3013457	3022588	ENSGALG00000021316	11	1	2960315	3007093	6364
XLOC_006164	-	12	11264794	11275487	ENSGALG00000006465	12	1	11253813	11258331	6463
XLOC_015566	-	28	1096481	1097867	ENSGALG00000017524	28	1	1086890	1089949	6532
XLOC_015765	+	3	3063866	3073194	ENSGALG00000008233	3	1	3037097	3057283	6583
XLOC_016486	-	3	3063866	3087070	ENSGALG00000008233	3	1	3037097	3057283	6583
XLOC_007707	+	15	6604765	6609007	ENSGALG00000004928	15	-1	6570787	6598063	6702
XLOC_010835	-	2	56225529	56240762	ENSGALG00000019589	2	-1	56213417	56218826	6703
XLOC_029649	+	JH375240.1	2869	4493	ENSGALG00000000495	JH375240.1	1	5570	9602	6733
XLOC_018594	+	4	43243545	43248198	ENSGALG00000010769	4	-1	43211798	43236772	6773
XLOC_000568	+	1	74322972	74338846	ENSGALG00000017271	1	-1	74131986	74316155	6817
XLOC_020544	+	5	15170180	15177111	ENSGALG00000014239	5	1	15148230	15163302	6878
XLOC_025488	-	9	18746335	18757016	ENSGALG00000009170	9	1	18723963	18739402	6933
XLOC_010641	-	2	31006558	31010964	ENSGALG00000025204	2	1	31013471	31013558	7000
XLOC_021091	-	5	16075401	16077268	ENSGALG00000020485	5	-1	16056782	16068381	7020
XLOC_000639	+	1	79265865	79284683	ENSGALG00000027688	1	-1	79257200	79258833	7032
XLOC_000595	+	1	76659032	76661989	ENSGALG00000014468	1	-1	76644865	76651986	7046
XLOC_010372	+	2	129006329	129012495	ENSGALG00000016063	2	-1	128996370	128999180	7149
XLOC_016915	-	3	66723595	66754384	ENSGALG00000015297	3	-1	66702483	66716393	7202
XLOC_023126	+	7	6193710	6197492	ENSGALG00000004274	7	1	6156611	6186495	7215
XLOC_025515	-	9	22229081	22235916	ENSGALG00000009682	9	1	22173837	22221855	7226
XLOC_015033	+	27	126770	173623	ENSGALG00000000196	27	1	116781	119543	7227
XLOC_015193	-	27	126770	161366	ENSGALG00000000196	27	1	116781	119543	7227
XLOC_013490	-	21	249837	252264	ENSGALG00000000535	21	1	254221	257066	7229
XLOC_014793	+	26	3217795	3219237	ENSGALG00000001480	26	-1	3209334	3210471	7324
XLOC_010199	+	2	96412833	96439000	ENSGALG00000013891	2	1	96404418	96405491	7342
XLOC_004529	+	10	7520536	7525835	ENSGALG00000004435	10	1	7484146	7513189	7347
XLOC_010883	-	2	65781525	65833488	ENSGALG00000012808	2	-1	65668286	65773998	7527
XLOC_029570	+	JH375212.1	39079	48967	ENSGALG00000014003	JH375212.1	1	9142	31526	7553
XLOC_001447	-	1	30620705	30638773	ENSGALG00000009638	1	1	30541566	30613151	7554
XLOC_009186	+	19	5516555	5519861	ENSGALG00000026718	19	1	5520666	5524129	7574
XLOC_031887	-	Z	81469601	81471808	ENSGALG00000005423	Z	-1	81471948	81477206	7605
XLOC_000437	+	1	58549807	58553683	ENSGALG00000012908	1	1	58514627	58542189	7618
XLOC_008151	+	16	134534	139128	ENSGALG00000017829	16	1	142134	142204	7670
XLOC_004588	+	10	12677447	12695401	ENSGALG00000006782	10	1	12667221	12669762	7685
XLOC_001113	+	1	173738031	173756105	ENSGALG00000017070	1	-1	173655059	173730298	7733
XLOC_004574	+	10	11710312	11716171	ENSGALG00000006399	10	-1	11717025	11718092	7780
XLOC_002062	-	1	108405610	108411111	ENSGALG00000016145	1	-1	108376953	108397821	7789
XLOC_025171	+	9	13683153	13694650	ENSGALG00000007324	9	-1	13522136	13675334	7819
XLOC_006066	-	12	2731849	2736433	ENSGALG00000021350	12	1	2718771	2723984	7865
XLOC_013421	+	21	3312592	3313728	ENSGALG00000002492	21	1	3296484	3304541	8051
XLOC_001686	-	1	59466141	59475236	ENSGALG00000012936	1	-1	59449078	59458058	8083
XLOC_018795	+	4	76464167	76469223	ENSGALG00000014516	4	-1	76407832	76456077	8090
XLOC_030431	+	JH376151.1	21694	23668	ENSGALG00000000915	JH376151.1	-1	11611	13585	8109
XLOC_031732	-	Z	51821271	51825727	ENSGALG00000015311	Z	1	51729348	51813091	8180
XLOC_015477	+	28	2983424	2986058	ENSGALG00000012225	28	1	2970822	2975230	8194
XLOC_013458	+	21	5349214	5361397	ENSGALG00000004256	21	1	5316086	5340991	8223
XLOC_031702	-	Z	44551777	44563913	ENSGALG00000013493	Z	-1	44506429	44543549	8228
XLOC_008178	-	16	133920	139222	ENSGALG00000017829	16	1	142134	142204	8284
XLOC_015799	+	3	7565919	7582136	ENSGALG00000009092	3	-1	7548124	7557605	8314
XLOC_007308	-	14	4840505	4841562	ENSGALG00000024107	14	-1	4827068	4832180	8325
XLOC_018302	+	4	1781042	1782174	ENSGALG00000027069	4	1	1770827	1772689	8353
XLOC_021158	-	5	23724197	23730149	ENSGALG00000027874	5	1	23730412	23732558	8361
XLOC_031240	+	Z	44552045	44563799	ENSGALG00000013493	Z	-1	44506429	44543549	8496
XLOC_018812	+	4	79326012	79331596	ENSGALG00000027597	4	-1	79334429	79334527	8515
XLOC_013739	+	22	145702	148019	ENSGALG00000000085	22	1	109341	137149	8553
XLOC_005541	-	11	9792261	9795383	ENSGALG00000004867	11	1	9796417	9800911	8650
XLOC_008770	+	18	9499508	9501631	ENSGALG00000026930	18	-1	9475287	9490841	8667
XLOC_015853	+	3	14904437	14908447	ENSGALG00000008667	3	-1	14892489	14895763	8674
XLOC_010210	+	2	98263232	98265810	ENSGALG00000014142	2	-1	98227825	98254555	8677
XLOC_021051	-	5	12039556	12062397	ENSGALG00000006358	5	1	12025883	12030870	8686
XLOC_009425	-	19	7629760	7630353	ENSGALG00000023577	19	-1	7630833	7638493	8733
XLOC_015511	+	28	3717568	3719090	ENSGALG00000024273	28	-1	3721467	3726317	8749
XLOC_013472	+	21	6444367	6449754	ENSGALG00000004882	21	-1	6433183	6435441	8926
XLOC_030727	-	JH376379.1	66045	68905	ENSGALG00000022237	JH376379.1	1	72924	75006	8961
XLOC_001681	-	1	58551192	58557521	ENSGALG00000012908	1	1	58514627	58542189	9003
XLOC_019447	-	4	82022680	82030610	ENSGALG00000015666	4	1	82006422	82013592	9088
XLOC_007811	+	15	11401088	11404475	ENSGALG00000008207	15	-1	11344250	11391980	9108
XLOC_009755	+	2	15314282	15320977	ENSGALG00000007379	2	-1	15257309	15305150	9132
XLOC_002057	-	1	107455234	107459386	ENSGALG00000016128	1	1	107444587	107446093	9141
XLOC_030885	+	LGE64	667187	670947	ENSGALG00000009103	LGE64	-1	610461	657996	9191
XLOC_010135	+	2	81133915	81170628	ENSGALG00000013102	2	-1	81014599	81124708	9207
XLOC_013762	+	22	2035925	2127683	ENSGALG00000001560	22	1	1989333	2026713	9212
XLOC_007064	+	14	3937860	3939373	ENSGALG00000004449	14	-1	3919206	3928547	9313
XLOC_023331	+	7	30722091	30726776	ENSGALG00000020593	7	1	30710686	30712735	9356
XLOC_008798	+	18	10367574	10369754	ENSGALG00000007367	18	-1	10370916	10376965	9391
XLOC_019242	-	4	49326275	49333423	ENSGALG00000027872	4	-1	49315135	49316800	9475
XLOC_022335	+	6	30232556	30240350	ENSGALG00000009486	6	1	30185811	30223053	9503
XLOC_015203	-	27	439225	444327	ENSGALG00000018528	27	-1	428858	429692	9533
XLOC_011298	-	2	147977941	147987862	ENSGALG00000027086	2	-1	147963777	147968205	9736
XLOC_025192	+	9	14804593	14808783	ENSGALG00000023868	9	1	14813174	14814442	9849
XLOC_000841	+	1	111975194	111983201	ENSGALG00000027310	1	1	111965213	111965322	9872
XLOC_029479	+	JH375168.1	32023	38578	ENSGALG00000028700	JH375168.1	1	10984	22110	9913
XLOC_010124	+	2	79834704	79859975	ENSGALG00000028336	2	1	79819044	79824696	10008
XLOC_002078	-	1	109444548	109463903	ENSGALG00000016205	1	1	109396355	109434509	10039
XLOC_006012	+	12	19398398	19401593	ENSGALG00000008378	12	-1	19318977	19388311	10087
XLOC_022293	+	6	25258596	25263794	ENSGALG00000008523	6	-1	25219899	25248494	10102
XLOC_019310	-	4	60370730	60394770	ENSGALG00000012298	4	-1	60340370	60360614	10116
XLOC_009455	-	19	9941211	9945006	ENSGALG00000006069	19	-1	9907410	9931066	10145
XLOC_010081	+	2	66463537	66487924	ENSGALG00000025747	2	-1	66442635	66453335	10202
XLOC_010894	-	2	66463537	66487924	ENSGALG00000025747	2	-1	66442635	66453335	10202
XLOC_025078	+	9	3954219	3963070	ENSGALG00000006496	9	-1	3938205	3943936	10283
XLOC_001553	-	1	48096768	48100193	ENSGALG00000011798	1	-1	48100662	48107192	10424
XLOC_019215	-	4	45521041	45525481	ENSGALG00000011124	4	-1	45480033	45510533	10508
XLOC_006614	+	13	16195559	16197993	ENSGALG00000021104	13	1	16146829	16184900	10659
XLOC_015774	+	3	3308210	3313794	ENSGALG00000018733	3	1	3296282	3297536	10674
XLOC_016769	-	3	40071504	40074997	ENSGALG00000011174	3	1	40054701	40060672	10832
XLOC_010836	-	2	56229713	56252735	ENSGALG00000019589	2	-1	56213417	56218826	10887
XLOC_010017	+	2	56229727	56252739	ENSGALG00000019589	2	-1	56213417	56218826	10901
XLOC_008824	-	18	5937	8126	ENSGALG00000000346	18	-1	15432	16889	10952
XLOC_023103	+	7	2897911	2988352	ENSGALG00000002944	7	1	2785930	2886932	10979
XLOC_011250	-	2	137475066	137482916	ENSGALG00000027485	2	-1	137463929	137464037	11029
XLOC_009221	+	19	6613662	6619179	ENSGALG00000004519	19	1	6592915	6602620	11042
XLOC_029958	-	JH375595.1	874	4403	ENSGALG00000026008	JH375595.1	-1	5868	11927	11053
XLOC_016220	+	3	67422896	67426227	ENSGALG00000015316	3	-1	67409305	67411773	11123
XLOC_006759	-	13	11635508	11637514	ENSGALG00000004078	13	1	11614837	11624376	11132
XLOC_004494	+	10	3417294	3420800	ENSGALG00000003336	10	1	3366148	3406151	11143
XLOC_016765	-	3	39936280	39941832	ENSGALG00000011155	3	1	39916197	39925126	11154
XLOC_031675	-	Z	40675272	40679426	ENSGALG00000012606	Z	-1	40679500	40686431	11159
XLOC_021059	-	5	13140981	13147952	ENSGALG00000006552	5	1	13125200	13129792	11189
XLOC_022093	+	6	2127123	2131200	ENSGALG00000002015	6	1	2108594	2115926	11197
XLOC_015128	+	27	3637545	3640479	ENSGALG00000000284	27	1	3621645	3626317	11228
XLOC_019002	-	4	11165343	11177833	ENSGALG00000007476	4	1	11136143	11153887	11456
XLOC_016879	-	3	61931719	61940855	ENSGALG00000028758	3	-1	61920136	61920236	11483
XLOC_014765	+	26	2199737	2205303	ENSGALG00000000708	26	-1	2205356	2211224	11487
XLOC_013997	+	23	4867319	4874056	ENSGALG00000003174	23	-1	4853152	4855812	11507
XLOC_008480	-	17	6330210	6335494	ENSGALG00000003712	17	-1	6242167	6318608	11602
XLOC_015510	+	28	3714681	3717166	ENSGALG00000024273	28	-1	3721467	3726317	11636
XLOC_012789	+	20	8331971	8342296	ENSGALG00000005348	20	-1	8309311	8320262	11709
XLOC_002434	-	1	184724809	184726587	ENSGALG00000017205	1	-1	184706330	184712962	11847
XLOC_007219	+	14	13636067	13640668	ENSGALG00000002497	14	1	13612397	13624164	11903
XLOC_002058	-	1	107489691	107495279	ENSGALG00000016132	1	1	107469994	107477780	11911
XLOC_022634	-	6	30234977	30240350	ENSGALG00000009486	6	1	30185811	30223053	11924
XLOC_000004	+	1	135084	141768	ENSGALG00000025765	1	-1	122020	123141	11943
XLOC_014070	-	23	1880785	1885081	ENSGALG00000000921	23	-1	1858073	1868819	11966
XLOC_015581	-	28	1542595	1546349	ENSGALG00000001800	28	1	1548033	1554708	12113
XLOC_020712	+	5	33678912	33685318	ENSGALG00000009946	5	-1	33616118	33666611	12301
XLOC_002020	-	1	103405615	103407817	ENSGALG00000015822	1	1	103363914	103393291	12324
XLOC_002128	-	1	119262910	119269570	ENSGALG00000016410	1	1	119243266	119250553	12357
XLOC_007256	-	14	1056421	1067318	ENSGALG00000003465	14	-1	1039017	1043904	12517
XLOC_031052	+	Z	9310917	9315998	ENSGALG00000017952	Z	-1	9298109	9298211	12706
XLOC_010962	-	2	85038405	85050291	ENSGALG00000013149	2	-1	84812789	85025689	12716
XLOC_000779	+	1	104223502	104228766	ENSGALG00000015884	1	-1	104208526	104210748	12754
XLOC_013411	+	21	2625961	2630113	ENSGALG00000028701	21	1	2638678	2638787	12826
XLOC_009949	+	2	46805140	46813035	ENSGALG00000012080	2	-1	46817366	46818157	13017
XLOC_002210	-	1	132794453	132800050	ENSGALG00000016776	1	-1	132731877	132781402	13051
XLOC_001977	-	1	91625985	91635153	ENSGALG00000015473	1	-1	91610621	91612619	13366
XLOC_021294	-	5	38613019	38615121	ENSGALG00000010482	5	-1	38541886	38599635	13384
XLOC_006602	+	13	15146614	15150069	ENSGALG00000006424	13	-1	15085600	15133192	13422
XLOC_020873	+	5	54455326	54456970	ENSGALG00000011917	5	-1	54429980	54441774	13552
XLOC_007345	-	14	6757853	6759909	ENSGALG00000026103	14	1	6742071	6744272	13581
XLOC_002112	-	1	115347042	115358325	ENSGALG00000016287	1	1	115358588	115360638	13596
XLOC_001264	+	1	193942156	193944565	ENSGALG00000028491	1	-1	193927816	193928555	13601
XLOC_001925	-	1	82574608	82576080	ENSGALG00000027337	1	-1	82576247	82588250	13642
XLOC_020955	-	5	715753	733576	ENSGALG00000004792	5	-1	665318	702105	13648
XLOC_015967	+	3	29800843	29806455	ENSGALG00000010288	3	1	29786243	29787097	13746
XLOC_023460	-	7	12969015	12973177	ENSGALG00000008669	7	-1	12943026	12955241	13774
XLOC_024382	+	8	27984768	27988823	ENSGALG00000011331	8	1	27956041	27970725	14043
XLOC_022426	-	6	9039016	9075249	ENSGALG00000003612	6	1	8962083	9024949	14067
XLOC_013610	-	21	6326249	6334910	ENSGALG00000004790	21	1	6300381	6312118	14131
XLOC_020680	+	5	27649488	27667674	ENSGALG00000009487	5	1	27621920	27635279	14209
XLOC_010809	-	2	50438537	50455425	ENSGALG00000012309	2	-1	50411442	50424308	14229
XLOC_019284	-	4	56822774	56838583	ENSGALG00000028807	4	-1	56788244	56808532	14242
XLOC_009675	+	2	2268305	2273560	ENSGALG00000004754	2	-1	2080439	2253956	14349
XLOC_030876	+	LGE64	108119	111699	ENSGALG00000026046	LGE64	1	116549	122532	14413
XLOC_014741	+	26	1245593	1248209	ENSGALG00000000329	26	1	1251361	1260028	14435
XLOC_009909	+	2	42221118	42224812	ENSGALG00000011574	2	-1	42194624	42206589	14529
XLOC_005612	-	11	19046392	19079316	ENSGALG00000000713	11	1	18936951	19031832	14560
XLOC_013535	-	21	2820027	2835382	ENSGALG00000002055	21	1	2803581	2805434	14593
XLOC_025054	+	9	1736669	1740227	ENSGALG00000002169	9	-1	1740426	1751264	14595
XLOC_007246	-	14	694081	705342	ENSGALG00000002981	14	1	666460	679330	14751
XLOC_021084	-	5	15365629	15383551	ENSGALG00000006879	5	-1	15297420	15350854	14775
XLOC_013800	-	22	6498	13961	ENSGALG00000000014	22	1	14190	21274	14776
XLOC_016842	-	3	55130081	55156166	ENSGALG00000013969	3	1	55104707	55115222	14859
XLOC_012769	+	20	5869975	5871433	ENSGALG00000023834	20	1	5847927	5855091	14884
XLOC_015569	-	28	1164344	1166013	ENSGALG00000029174	28	-1	1171971	1179236	14892
XLOC_024416	-	8	3543782	3546506	ENSGALG00000002540	8	-1	3555676	3558786	15004
XLOC_013809	-	22	516502	521738	ENSGALG00000000227	22	-1	460057	501407	15095
XLOC_014612	-	25	618208	621700	ENSGALG00000014559	25	-1	577827	603090	15118
XLOC_009948	+	2	46793707	46796942	ENSGALG00000012078	2	-1	46759649	46778448	15259
XLOC_001064	+	1	167688403	167716556	ENSGALG00000016992	1	-1	167643341	167672972	15431
XLOC_010415	+	2	139337357	139456567	ENSGALG00000016308	2	1	139316928	139321894	15463
XLOC_020832	+	5	49680849	49712774	ENSGALG00000011384	5	1	49651289	49665372	15477
XLOC_023395	-	7	4958829	4962634	ENSGALG00000021031	7	-1	4973410	4974504	15675
XLOC_005282	+	11	2857397	2877425	ENSGALG00000003396	11	-1	2799114	2841716	15681
XLOC_023574	-	7	24814538	24825439	ENSGALG00000011593	7	1	24797914	24798846	15692
XLOC_021363	-	5	49681089	49689409	ENSGALG00000011384	5	1	49651289	49665372	15717
XLOC_019503	-	4	88252592	88255752	ENSGALG00000024497	4	-1	88268236	88268364	15772
XLOC_007823	-	15	2633	3395	ENSGALG00000025612	15	-1	18348	18412	15779
XLOC_001336	-	1	6246234	6256478	ENSGALG00000014038	1	1	6195405	6230350	15884
XLOC_022509	-	6	18154644	18174951	ENSGALG00000006174	6	-1	18108253	18138740	15904
XLOC_005898	+	12	4481502	4486117	ENSGALG00000004932	12	1	4379532	4465392	16110
XLOC_002357	-	1	170865866	170870437	ENSGALG00000017042	1	-1	170871050	170882022	16156
XLOC_009264	+	19	8769453	8772409	ENSGALG00000005559	19	1	8751274	8753292	16161
XLOC_017036	-	3	97060367	97071470	ENSGALG00000016456	3	1	96971362	97044067	16300
XLOC_014595	-	25	127656	137217	ENSGALG00000013899	25	-1	89665	111313	16343
XLOC_014334	-	24	200580	207638	ENSGALG00000000356	24	-1	209825	217136	16556
XLOC_020741	+	5	37187882	37190325	ENSGALG00000020417	5	-1	37203490	37204559	16677
XLOC_030710	+	JH376369.1	42	4167	ENSGALG00000011081	JH376369.1	-1	13741	16778	16736
XLOC_021405	-	5	54983290	54984556	ENSGALG00000012023	5	-1	54991344	55000030	16740
XLOC_013539	-	21	2976666	3009390	ENSGALG00000002228	21	-1	2919061	2959863	16803
XLOC_002171	-	1	128421967	128431102	ENSGALG00000016686	1	-1	128396788	128405095	16872
XLOC_016978	-	3	82073651	82083799	ENSGALG00000015959	3	-1	81796518	82056693	16958
XLOC_031851	-	Z	72806425	72809428	ENSGALG00000028484	Z	1	72816763	72823417	16992
XLOC_031598	-	Z	25683847	25694574	ENSGALG00000010156	Z	1	25582286	25666831	17016
XLOC_002515	-	1	194685592	194689613	ENSGALG00000017323	1	-1	194561126	194668318	17274
XLOC_025237	+	9	17522503	17662593	ENSGALG00000013837	9	1	17416496	17505171	17332
XLOC_023394	-	7	4957125	4958768	ENSGALG00000021031	7	-1	4973410	4974504	17379
XLOC_014425	-	24	5630081	5640110	ENSGALG00000007685	24	-1	5601465	5612457	17624
XLOC_020863	+	5	53131964	53135655	ENSGALG00000011811	5	-1	52957672	53114338	17626
XLOC_016643	-	3	23989451	24008631	ENSGALG00000009928	3	-1	23937632	23971796	17655
XLOC_019120	-	4	29413593	29418689	ENSGALG00000009868	4	1	29387911	29395648	17945
XLOC_008300	+	17	5627630	5628761	ENSGALG00000017611	17	1	5643002	5645859	18229
XLOC_016770	-	3	40078911	40114243	ENSGALG00000011174	3	1	40054701	40060672	18239
XLOC_010297	+	2	114912813	114925730	ENSGALG00000015524	2	-1	114881199	114894526	18287
XLOC_014938	-	26	4007571	4018485	ENSGALG00000002561	26	-1	4021842	4025891	18320
XLOC_024697	-	8	28600426	28604904	ENSGALG00000011369	8	1	28607272	28618820	18394
XLOC_019502	-	4	88249834	88256690	ENSGALG00000024497	4	-1	88268236	88268364	18530
XLOC_031360	+	Z	70340466	70348936	ENSGALG00000001933	Z	-1	70306842	70321833	18633
XLOC_010777	-	2	45408251	45411539	ENSGALG00000011995	2	-1	45255770	45389575	18676
XLOC_002221	-	1	135508443	135516458	ENSGALG00000016805	1	1	135521670	135527319	18876
XLOC_000041	+	1	3497085	3501819	ENSGALG00000006324	1	1	3450218	3478178	18907
XLOC_001765	-	1	71590576	71611796	ENSGALG00000013911	1	-1	71546272	71571545	19031
XLOC_024544	-	8	13997974	14001310	ENSGALG00000006170	8	-1	14012251	14017104	19130
XLOC_025428	-	9	14336047	14339240	ENSGALG00000007419	9	1	14339432	14355179	19132
XLOC_023415	-	7	7352078	7354210	ENSGALG00000007527	7	1	7256354	7332733	19345
XLOC_013859	-	22	3968650	3973943	ENSGALG00000000469	22	1	3934595	3949175	19475
XLOC_002376	-	1	174437693	174440300	ENSGALG00000017082	1	1	174411695	174418072	19621
XLOC_018872	+	4	88700302	88703891	ENSGALG00000025428	4	1	88719865	88719958	19656
XLOC_025530	-	9	22939491	22944302	ENSGALG00000010369	9	1	22944425	22959198	19707
XLOC_029482	-	JH375168.1	110	1455	ENSGALG00000025351	JH375168.1	-1	19777	19844	19734
XLOC_019181	-	4	38829602	38834675	ENSGALG00000010614	4	-1	38807037	38809857	19745
XLOC_022460	-	6	12886202	12909452	ENSGALG00000004973	6	1	12817242	12866350	19852
XLOC_004875	-	10	18866279	18872425	ENSGALG00000008095	10	1	18828578	18846365	19914
XLOC_012949	-	20	5057625	5128840	ENSGALG00000003670	20	-1	5036695	5037630	19995
XLOC_031341	+	Z	65826873	65833676	ENSGALG00000023083	Z	-1	65783774	65806806	20067
XLOC_006665	-	13	1267273	1274758	ENSGALG00000028565	13	1	1217194	1247116	20157
XLOC_014100	-	23	2782976	3106102	ENSGALG00000001443	23	1	2715391	2762791	20185
XLOC_000703	+	1	87829027	87836324	ENSGALG00000015375	1	1	87804275	87808822	20205
XLOC_012806	+	20	9675322	9677256	ENSGALG00000021079	20	1	9692144	9695672	20350
XLOC_006630	+	13	16691873	16709183	ENSGALG00000026251	13	-1	16670608	16671501	20372
XLOC_009879	+	2	35486230	35490262	ENSGALG00000011251	2	-1	35162267	35465811	20419
XLOC_010540	-	2	14678039	14679303	ENSGALG00000007331	2	-1	14597995	14657468	20571
XLOC_031099	+	Z	16839871	16878336	ENSGALG00000014713	Z	1	16787971	16819236	20635
XLOC_022169	+	6	11589364	11592126	ENSGALG00000004794	6	-1	11556862	11568617	20747
XLOC_022336	+	6	30243902	30252736	ENSGALG00000009486	6	1	30185811	30223053	20849
XLOC_022635	-	6	30243902	30250143	ENSGALG00000009486	6	1	30185811	30223053	20849
XLOC_031473	-	Z	9116171	9119092	ENSGALG00000021340	Z	-1	9084930	9095262	20909
XLOC_004679	-	10	465202	466611	ENSGALG00000002475	10	1	434180	444155	21047
XLOC_022569	-	6	22481157	22491110	ENSGALG00000007820	6	-1	22379629	22460065	21092
XLOC_002108	-	1	114954066	114955224	ENSGALG00000016281	1	1	114233667	114932830	21236
XLOC_016033	+	3	39151569	39164398	ENSGALG00000011065	3	-1	39093469	39130259	21310
XLOC_022418	-	6	8668256	8684824	ENSGALG00000024288	6	1	8687539	8689635	21379
XLOC_006139	-	12	9272365	9275632	ENSGALG00000021866	12	-1	9283623	9293938	21573
XLOC_006634	+	13	17082770	17086903	ENSGALG00000012322	13	1	17026764	17061115	21655
XLOC_017054	-	3	101389527	101390749	ENSGALG00000016485	3	1	101365502	101367829	21698
XLOC_005496	-	11	2616535	2624192	ENSGALG00000003323	11	-1	2590160	2594660	21875
XLOC_013957	+	23	3134605	3140820	ENSGALG00000001453	23	-1	3153762	3156554	21949
XLOC_016475	-	3	2399256	2404404	ENSGALG00000020103	3	1	2371502	2377190	22066
XLOC_007673	+	15	5361419	5368481	ENSGALG00000003835	15	-1	5297891	5339287	22132
XLOC_016048	+	3	40082828	40089743	ENSGALG00000011174	3	1	40054701	40060672	22156
XLOC_006645	+	13	17729819	17737704	ENSGALG00000007669	13	1	17704810	17707611	22208
XLOC_016355	+	3	97066296	97071460	ENSGALG00000016456	3	1	96971362	97044067	22229
XLOC_020579	+	5	16978081	17027974	ENSGALG00000007566	5	1	16929905	16955722	22359
XLOC_018583	+	4	39304264	39320837	ENSGALG00000010662	4	1	39326001	39326654	22390
XLOC_016043	+	3	39947560	39949207	ENSGALG00000011155	3	1	39916197	39925126	22434
XLOC_024237	+	8	14168324	14171984	ENSGALG00000006237	8	-1	14118086	14145849	22475
XLOC_005840	+	12	178188	199700	ENSGALG00000001444	12	1	85233	155627	22561
XLOC_001435	-	1	28089384	28146501	ENSGALG00000028019	1	-1	28066674	28066785	22599
XLOC_031738	-	Z	52476652	52489360	ENSGALG00000015333	Z	-1	52440938	52454026	22626
XLOC_000647	+	1	79648447	79656045	ENSGALG00000014997	1	-1	79608386	79625612	22835
XLOC_013081	-	20	13598922	13606424	ENSGALG00000007963	20	1	13524951	13576049	22873
XLOC_016652	-	3	25572456	25574519	ENSGALG00000009990	3	-1	25432172	25549520	22936
XLOC_006138	-	12	9223935	9227069	ENSGALG00000022648	12	1	9245863	9246974	23039
XLOC_008349	+	17	7778386	7781848	ENSGALG00000002420	17	-1	7745152	7755257	23129
XLOC_022644	-	6	31528396	31534099	ENSGALG00000000054	6	-1	31539142	31551526	23130
XLOC_015813	+	3	8732774	8739880	ENSGALG00000008944	3	-1	8669453	8709640	23134
XLOC_002094	-	1	112056540	112060673	ENSGALG00000016249	1	-1	112079238	112079688	23148
XLOC_009773	+	2	18953815	18959717	ENSGALG00000008557	2	-1	18960948	18977002	23187
XLOC_016845	-	3	55575866	55581095	ENSGALG00000029024	3	-1	55546608	55552571	23295
XLOC_001398	-	1	20061042	20071289	ENSGALG00000008694	1	1	20071621	20084350	23308
XLOC_004535	+	10	8389121	8393572	ENSGALG00000004641	10	1	8334755	8365618	23503
XLOC_014364	-	24	2492082	2500950	ENSGALG00000001472	24	1	2508056	2515621	23539
XLOC_022373	-	6	12137	14245	ENSGALG00000001813	6	1	31077	35916	23779
XLOC_013415	+	21	2831983	2835503	ENSGALG00000026875	21	1	2847289	2856043	24060
XLOC_004521	+	10	6882020	6903146	ENSGALG00000004294	10	-1	6816944	6857906	24114
XLOC_009697	+	2	4383447	4395576	ENSGALG00000005694	2	-1	4337075	4359285	24162
XLOC_014401	-	24	5060061	5069597	ENSGALG00000027111	24	1	5035783	5035892	24169
XLOC_018370	+	4	5260260	5267436	ENSGALG00000006822	4	1	5187964	5236035	24225
XLOC_000950	+	1	134560724	134575742	ENSGALG00000016797	1	-1	134496864	134536397	24327
XLOC_000149	+	1	26592966	26596960	ENSGALG00000009439	1	1	26616354	26617466	24500
XLOC_019124	-	4	29879027	29887068	ENSGALG00000009886	4	1	29887386	29903565	24538
XLOC_002075	-	1	109289356	109313851	ENSGALG00000016201	1	-1	109252143	109264710	24646
XLOC_005296	+	11	6069817	6073354	ENSGALG00000003853	11	-1	6075619	6094478	24661
XLOC_013917	+	23	159	17900	ENSGALG00000000324	23	-1	21426	24856	24697
XLOC_019121	-	4	29420537	29433307	ENSGALG00000009868	4	1	29387911	29395648	24889
XLOC_010065	+	2	64879265	64888835	ENSGALG00000012799	2	-1	64735015	64854227	25038
XLOC_023621	-	7	31957555	31966372	ENSGALG00000012407	7	-1	31350097	31932431	25124
XLOC_008713	+	18	4869909	4883543	ENSGALG00000002728	18	-1	4840925	4844689	25220
XLOC_007278	-	14	2713473	2714978	ENSGALG00000004209	14	1	2736010	2738694	25221
XLOC_031562	-	Z	21743216	21744503	ENSGALG00000014787	Z	1	21744857	21768486	25270
XLOC_006751	-	13	11310083	11323297	ENSGALG00000003919	13	-1	11328565	11335356	25273
XLOC_012876	+	20	11931334	11935887	ENSGALG00000007636	20	-1	11834690	11906056	25278
XLOC_021453	-	5	58483592	58557497	ENSGALG00000012429	5	-1	58454254	58457967	25625
XLOC_010171	+	2	89369819	89372771	ENSGALG00000013568	2	-1	89372989	89395602	25783
XLOC_010266	+	2	108167234	108184633	ENSGALG00000024487	2	1	108189927	108193054	25820
XLOC_020830	+	5	49578009	49580147	ENSGALG00000011376	5	-1	49550497	49551932	26077
XLOC_014053	-	23	1368624	1379356	ENSGALG00000000678	23	1	1392832	1394720	26096
XLOC_004769	-	10	7209579	7247046	ENSGALG00000023562	10	-1	7159553	7183472	26107
XLOC_015940	+	3	26166449	26187219	ENSGALG00000010016	3	1	26187339	26192877	26428
XLOC_025160	+	9	12450203	12459097	ENSGALG00000028015	9	-1	12410467	12423754	26449
XLOC_016682	-	3	30060210	30134837	ENSGALG00000010290	3	-1	30013851	30033731	26479
XLOC_000461	+	1	61001564	61023595	ENSGALG00000012994	1	1	60698479	60974728	26836
XLOC_000173	+	1	31091651	31101357	ENSGALG00000009730	1	-1	31044183	31064734	26917
XLOC_020760	+	5	38235084	38249826	ENSGALG00000020411	5	1	38261372	38262187	27103
XLOC_004531	+	10	8153108	8170684	ENSGALG00000021321	10	-1	8174137	8180628	27520
XLOC_000870	+	1	119744710	119763281	ENSGALG00000016430	1	-1	119705079	119717030	27680
XLOC_016090	+	3	46674903	46681260	ENSGALG00000028420	3	1	46522593	46647011	27892
XLOC_008854	-	18	2975629	2979122	ENSGALG00000001404	18	-1	2868764	2947619	28010
XLOC_000748	+	1	96582895	96590452	ENSGALG00000027990	1	-1	96554624	96554779	28116
XLOC_022636	-	6	30251186	30253840	ENSGALG00000009486	6	1	30185811	30223053	28133
XLOC_031555	-	Z	20215295	20220636	ENSGALG00000014747	Z	1	20070886	20186949	28346
XLOC_016998	-	3	87652681	87654616	ENSGALG00000016313	3	1	87606764	87624294	28387
XLOC_001766	-	1	71612111	71619849	ENSGALG00000026856	1	1	71640474	71640579	28468
XLOC_010502	-	2	5682922	5690587	ENSGALG00000006153	2	-1	5692041	5711470	28548
XLOC_013483	-	21	84435	92883	ENSGALG00000000449	21	-1	97066	113056	28621
XLOC_001363	-	1	13780486	13788127	ENSGALG00000008132	1	1	13788331	13809208	28722
XLOC_004649	+	10	19089297	19094076	ENSGALG00000008143	10	-1	19102913	19118345	29048
XLOC_011017	-	2	96556774	96560822	ENSGALG00000013886	2	-1	96516594	96527721	29053
XLOC_007431	-	14	13653239	13661582	ENSGALG00000002497	14	1	13612397	13624164	29075
XLOC_017025	-	3	95397085	95421504	ENSGALG00000016403	3	1	95424295	95426233	29148
XLOC_001448	-	1	30642323	30694821	ENSGALG00000009638	1	1	30541566	30613151	29172
XLOC_001630	-	1	52377103	52425587	ENSGALG00000028574	1	1	52346738	52347832	29271
XLOC_022570	-	6	22517725	22519391	ENSGALG00000007828	6	-1	22541167	22547035	29310
XLOC_031685	-	Z	42000355	42011735	ENSGALG00000012629	Z	-1	42022852	42029812	29457
XLOC_009744	+	2	13052464	13063234	ENSGALG00000007095	2	1	12972707	13022987	29477
XLOC_000640	+	1	79288350	79290490	ENSGALG00000027688	1	-1	79257200	79258833	29517
XLOC_018810	+	4	79286909	79287781	ENSGALG00000015537	4	1	79289514	79316474	29565
XLOC_030875	+	LGE64	92866	101635	ENSGALG00000026046	LGE64	1	116549	122532	29666
XLOC_000722	+	1	90776394	90781234	ENSGALG00000014414	1	-1	90723135	90746660	29734
XLOC_022600	-	6	25881439	25903128	ENSGALG00000021879	6	1	25843835	25851639	29800
XLOC_020624	+	5	23047298	23051061	ENSGALG00000008393	5	-1	22996602	23017438	29860
XLOC_008888	-	18	4874572	4885480	ENSGALG00000002728	18	-1	4840925	4844689	29883
XLOC_020757	+	5	38070653	38073037	ENSGALG00000010365	5	1	37917633	38040716	29937
XLOC_006719	-	13	8610747	8615298	ENSGALG00000026411	13	1	8640988	8641065	30318
XLOC_018602	+	4	44198027	44201235	ENSGALG00000010878	4	-1	44202175	44228430	30403
XLOC_001631	-	1	52378364	52387209	ENSGALG00000028574	1	1	52346738	52347832	30532
XLOC_016023	+	3	37754396	37756335	ENSGALG00000018929	3	1	37720210	37723729	30667
XLOC_004536	+	10	8396493	8398132	ENSGALG00000004641	10	1	8334755	8365618	30875
XLOC_001702	-	1	61846040	61872664	ENSGALG00000013031	1	-1	61797124	61815018	31022
XLOC_009837	+	2	30595207	30614428	ENSGALG00000010905	2	1	30537280	30564128	31079
XLOC_016424	+	3	106429980	106440798	ENSGALG00000028138	3	-1	106375249	106398770	31210
XLOC_017103	-	3	106429980	106440798	ENSGALG00000028138	3	-1	106375249	106398770	31210
XLOC_008391	-	17	69361	83160	ENSGALG00000014171	17	-1	1663	38146	31215
XLOC_000563	+	1	73569038	73570767	ENSGALG00000017282	1	1	73518014	73537657	31381
XLOC_008218	+	17	69544	83153	ENSGALG00000014171	17	-1	1663	38146	31398
XLOC_020848	+	5	51285558	51298742	ENSGALG00000011590	5	-1	51307790	51316972	31414
XLOC_001213	+	1	188306784	188319473	ENSGALG00000017248	1	-1	188266498	188275287	31497
XLOC_009138	+	19	3354314	3361844	ENSGALG00000001573	19	1	3315456	3322810	31504
XLOC_022337	+	6	30254679	30257432	ENSGALG00000009486	6	1	30185811	30223053	31626
XLOC_014287	+	24	4118443	4123461	ENSGALG00000006746	24	1	4084031	4086746	31697
XLOC_015624	-	28	2918535	2931786	ENSGALG00000002672	28	-1	2858811	2886701	31834
XLOC_015925	+	3	23437436	23461927	ENSGALG00000009925	3	1	23294331	23405312	32124
XLOC_016640	-	3	23437436	23455190	ENSGALG00000009925	3	1	23294331	23405312	32124
XLOC_007043	+	14	1834238	1842479	ENSGALG00000024294	14	1	1799914	1802054	32184
XLOC_006660	-	13	893132	926093	ENSGALG00000028033	13	1	860147	860890	32242
XLOC_010324	+	2	120863292	120880215	ENSGALG00000025727	2	1	120829351	120831013	32279
XLOC_007262	-	14	1834368	1844819	ENSGALG00000024294	14	1	1799914	1802054	32314
XLOC_019424	-	4	79283878	79286786	ENSGALG00000015537	4	1	79289514	79316474	32596
XLOC_023340	+	7	34105570	34109452	ENSGALG00000012448	7	-1	34059513	34072973	32597
XLOC_001939	-	1	83606656	83612283	ENSGALG00000015240	1	-1	83561890	83573845	32811
XLOC_001667	-	1	56770653	56784361	ENSGALG00000012847	1	-1	56787533	56803606	32953
XLOC_031190	+	Z	33509051	33511549	ENSGALG00000015090	Z	-1	33468263	33476023	33028
XLOC_021365	-	5	49994282	49997817	ENSGALG00000011443	5	1	50006944	50027451	33169
XLOC_009456	-	19	9964456	9977056	ENSGALG00000006069	19	-1	9907410	9931066	33390
XLOC_007263	-	14	1978020	1985405	ENSGALG00000003642	14	-1	1990041	2011428	33408
XLOC_018459	+	4	19573056	19581371	ENSGALG00000009241	4	-1	19535952	19539594	33462
XLOC_025259	+	9	20553883	20571273	ENSGALG00000017374	9	1	20586079	20587887	34004
XLOC_022083	+	6	1879	4307	ENSGALG00000001813	6	1	31077	35916	34037
XLOC_008197	-	16	443497	446009	ENSGALG00000026466	16	1	406688	409405	34092
XLOC_031511	-	Z	13179706	13232929	ENSGALG00000014851	Z	1	13134002	13145543	34163
XLOC_006646	+	13	17741838	17746802	ENSGALG00000007669	13	1	17704810	17707611	34227
XLOC_013976	+	23	3936311	3950280	ENSGALG00000002112	23	1	3965824	3970617	34306
XLOC_014108	-	23	3936311	3950280	ENSGALG00000002112	23	1	3965824	3970617	34306
XLOC_006537	+	13	9866139	9870452	ENSGALG00000003512	13	1	9876040	9900608	34469
XLOC_016883	-	3	62475685	62478305	ENSGALG00000014892	3	1	62306228	62441189	34496
XLOC_011052	-	2	101534684	101577499	ENSGALG00000015735	2	-1	101499227	101500118	34566
XLOC_007273	-	14	2512059	2513949	ENSGALG00000004070	14	-1	2524724	2546726	34667
XLOC_006822	-	13	16984067	17000936	ENSGALG00000007404	13	-1	17011666	17018764	34697
XLOC_013418	+	21	2994645	3009916	ENSGALG00000002228	21	-1	2919061	2959863	34782
XLOC_022605	-	6	26956595	26968675	ENSGALG00000008905	6	1	26971704	26991533	34938
XLOC_031761	-	Z	57021104	57022423	ENSGALG00000014681	Z	1	56954953	56986064	35040
XLOC_006511	+	13	8710221	8759263	ENSGALG00000002903	13	-1	8670014	8675139	35082
XLOC_019511	-	4	88998825	88999750	ENSGALG00000027110	4	1	88963623	88963713	35112
XLOC_015743	+	3	342240	349612	ENSGALG00000021792	3	-1	306984	307072	35168
XLOC_014027	-	23	100226	105902	ENSGALG00000000360	23	-1	29155	65025	35201
XLOC_015792	+	3	4496748	4505150	ENSGALG00000008708	3	-1	4440835	4461503	35245
XLOC_005330	+	11	10338784	10350373	ENSGALG00000004935	11	1	10356455	10374076	35292
XLOC_002416	-	1	180018677	180025608	ENSGALG00000017172	1	1	179979236	179983226	35451
XLOC_022659	-	6	33827552	33838494	ENSGALG00000010464	6	1	33841581	33863088	35536
XLOC_016760	-	3	39499332	39503055	ENSGALG00000011101	3	1	39429522	39463754	35578
XLOC_011111	-	2	110982202	111001481	ENSGALG00000015416	2	-1	111004143	111017846	35644
XLOC_002318	-	1	166890552	166894964	ENSGALG00000016972	1	-1	166904655	166927469	36917
XLOC_008339	+	17	7247001	7249741	ENSGALG00000017909	17	-1	7209751	7209878	37123
XLOC_005367	+	11	15989826	16005203	ENSGALG00000005494	11	-1	16006621	16026955	37129
XLOC_023494	-	7	16755685	16817395	ENSGALG00000009329	7	-1	16707885	16718444	37241
XLOC_002090	-	1	111565052	111566214	ENSGALG00000016238	1	1	111568866	111602294	37242
XLOC_010733	-	2	41689180	41697846	ENSGALG00000011518	2	1	41724950	41726683	37503
XLOC_002038	-	1	105003756	105005035	ENSGALG00000016007	1	-1	104962792	104966121	37635
XLOC_009995	+	2	53048538	53075819	ENSGALG00000012369	2	-1	52757783	53010513	38025
XLOC_025161	+	9	12461780	12471938	ENSGALG00000028015	9	-1	12410467	12423754	38026
XLOC_000960	+	1	135755304	135757343	ENSGALG00000016808	1	1	135763887	135793418	38114
XLOC_016865	-	3	59329919	59345205	ENSGALG00000014834	3	-1	59223034	59291522	38397
XLOC_025427	-	9	14235578	14239778	ENSGALG00000007357	9	1	14257892	14274166	38588
XLOC_007363	-	14	7766962	7777075	ENSGALG00000006730	14	1	7704305	7728001	38961
XLOC_019114	-	4	29060320	29090063	ENSGALG00000009813	4	1	29092843	29099436	39116
XLOC_020806	+	5	45533515	45560895	ENSGALG00000029161	5	1	45494000	45494086	39429
XLOC_014052	-	23	1355210	1362355	ENSGALG00000000678	23	1	1392832	1394720	39510
XLOC_031100	+	Z	17041387	17099799	ENSGALG00000014717	Z	-1	16950760	17001487	39900
XLOC_021308	-	5	42231806	42239187	ENSGALG00000010598	5	-1	42240385	42272204	40398
XLOC_030692	-	JH376349.1	14798	33361	ENSGALG00000027495	JH376349.1	-1	36793	55599	40801
XLOC_011074	-	2	103369861	103371601	ENSGALG00000015112	2	-1	103383680	103410706	40845
XLOC_018883	-	4	15628	21695	ENSGALG00000004716	4	-1	48270	56854	41226
XLOC_010923	-	2	75104123	75150586	ENSGALG00000022942	2	1	75059250	75062787	41336
XLOC_016189	+	3	63109767	63115723	ENSGALG00000014918	3	-1	63117944	63151148	41381
XLOC_031684	-	Z	41819600	41826054	ENSGALG00000012621	Z	1	41826411	41861266	41666
XLOC_024506	-	8	10330559	10336609	ENSGALG00000005180	8	1	10153022	10288846	41713
XLOC_002362	-	1	171759221	171775719	ENSGALG00000019087	1	-1	171711512	171717479	41742
XLOC_008340	+	17	7252217	7255539	ENSGALG00000002633	17	-1	7292834	7294022	41805
XLOC_019296	-	4	59488035	59489666	ENSGALG00000028828	4	-1	59497316	59530000	41965
XLOC_023214	+	7	16982845	16988610	ENSGALG00000009344	7	-1	16842857	16940702	42143
XLOC_002093	-	1	112007794	112022149	ENSGALG00000027310	1	1	111965213	111965322	42472
XLOC_001222	+	1	191986448	191996604	ENSGALG00000017269	1	-1	192008564	192029116	42668
XLOC_002111	-	1	115281975	115288498	ENSGALG00000016286	1	1	115230776	115238899	43076
XLOC_025415	-	9	12466903	12481220	ENSGALG00000028015	9	-1	12410467	12423754	43149
XLOC_004878	-	10	19074905	19092557	ENSGALG00000008143	10	-1	19102913	19118345	43440
XLOC_000837	+	1	111533039	111541613	ENSGALG00000016236	1	-1	111416662	111489576	43463
XLOC_019194	-	4	42813451	42830124	ENSGALG00000010755	4	-1	42763397	42769576	43875
XLOC_018509	+	4	29539729	29544208	ENSGALG00000009870	4	1	29463073	29495702	44027
XLOC_018953	-	4	3716388	3719760	ENSGALG00000006071	4	-1	3573000	3672301	44087
XLOC_021053	-	5	12223255	12238798	ENSGALG00000006382	5	1	12238926	12267404	44149
XLOC_018882	-	4	12231	26721	ENSGALG00000004716	4	-1	48270	56854	44623
XLOC_004832	-	10	15288910	15323599	ENSGALG00000007000	10	1	15328163	15333861	44951
XLOC_020506	+	5	10908334	10915170	ENSGALG00000006077	5	1	10948695	10953363	45029
XLOC_022351	+	6	31506491	31512022	ENSGALG00000000054	6	-1	31539142	31551526	45035
XLOC_016175	+	3	59336644	59345205	ENSGALG00000014834	3	-1	59223034	59291522	45122
XLOC_020783	+	5	42226696	42239217	ENSGALG00000010598	5	-1	42240385	42272204	45508
XLOC_000389	+	1	52393703	52425648	ENSGALG00000028574	1	1	52346738	52347832	45871
XLOC_016019	+	3	37587314	37608606	ENSGALG00000013921	3	1	37533438	37541244	46070
XLOC_011066	-	2	102269227	102298250	ENSGALG00000014976	2	1	102302371	102315684	46457
XLOC_024316	+	8	21482899	21488810	ENSGALG00000010494	8	1	21506673	21529836	46937
XLOC_011276	-	2	141636397	141649627	ENSGALG00000016216	2	-1	141549217	141589409	46988
XLOC_011065	-	2	102254618	102269113	ENSGALG00000014974	2	1	102139214	102207469	47149
XLOC_005940	+	12	10579654	10585830	ENSGALG00000006245	12	-1	10614316	10626926	47272
XLOC_006143	-	12	9341336	9368119	ENSGALG00000021866	12	-1	9283623	9293938	47398
XLOC_010766	-	2	44673979	44679301	ENSGALG00000023069	2	-1	44581825	44626570	47409
XLOC_010619	-	2	26716888	26725090	ENSGALG00000010722	2	1	26752974	26765336	48448
XLOC_001942	-	1	84060531	84070255	ENSGALG00000015267	1	-1	83998001	84011973	48558
XLOC_000621	+	1	77764168	77776647	ENSGALG00000025752	1	1	77712776	77715424	48744
XLOC_000147	+	1	26276608	26279449	ENSGALG00000009435	1	1	26299344	26325360	48752
XLOC_000514	+	1	67408518	67424692	ENSGALG00000014033	1	-1	67337860	67359692	48826
XLOC_010143	+	2	84507133	84565654	ENSGALG00000013145	2	-1	84337586	84458094	49039
XLOC_019113	-	4	29050216	29056646	ENSGALG00000009813	4	1	29092843	29099436	49220
XLOC_001352	-	1	12483901	12486803	ENSGALG00000008312	1	1	12486935	12533438	49537
XLOC_031033	+	Z	8514737	8519608	ENSGALG00000002069	Z	-1	8457024	8462408	52329
XLOC_018769	+	4	69217185	69303741	ENSGALG00000000177	4	-1	69141181	69164821	52364
XLOC_018992	-	4	10584022	10590731	ENSGALG00000025286	4	1	10531500	10531584	52438
XLOC_006512	+	13	8745057	8749289	ENSGALG00000014074	13	1	8764212	8797603	52546
XLOC_016356	+	3	97096746	97220240	ENSGALG00000016456	3	1	96971362	97044067	52679
XLOC_001629	-	1	52294820	52334694	ENSGALG00000028574	1	1	52346738	52347832	53012
XLOC_007272	-	14	2493693	2495195	ENSGALG00000004070	14	-1	2524724	2546726	53033
XLOC_000828	+	1	110309170	110327536	ENSGALG00000028187	1	1	110347436	110362439	53269
XLOC_016777	-	3	41294222	41303252	ENSGALG00000011296	3	1	41319933	41347556	53334
XLOC_025491	-	9	18973943	18977246	ENSGALG00000009252	9	1	18987372	19027508	53565
XLOC_022616	-	6	28068373	28082885	ENSGALG00000009152	6	1	27680834	28014799	53574
XLOC_016476	-	3	2430827	2440129	ENSGALG00000020103	3	1	2371502	2377190	53637
XLOC_010075	+	2	66104146	66151495	ENSGALG00000012813	2	-1	66027632	66050446	53700
XLOC_000896	+	1	125609443	125632241	ENSGALG00000016618	1	1	125536411	125555323	54120
XLOC_004835	-	10	16026327	16039847	ENSGALG00000025279	10	1	16080572	16080645	54318
XLOC_000842	+	1	112025361	112033433	ENSGALG00000016249	1	-1	112079238	112079688	54327
XLOC_018794	+	4	76401576	76407715	ENSGALG00000014516	4	-1	76407832	76456077	54501
XLOC_023564	-	7	22695884	22698571	ENSGALG00000011468	7	1	22733555	22750389	54505
XLOC_016466	-	3	361721	363544	ENSGALG00000021792	3	-1	306984	307072	54649
XLOC_018717	+	4	61055761	61076058	ENSGALG00000013571	4	1	60984023	61001007	54754
XLOC_001513	-	1	44218916	44227439	ENSGALG00000011276	1	-1	44271338	44273899	54983
XLOC_016034	+	3	39185486	39190479	ENSGALG00000011065	3	-1	39093469	39130259	55227
XLOC_001080	+	1	168786936	168801989	ENSGALG00000017013	1	1	168722024	168731618	55318
XLOC_004877	-	10	19062625	19067232	ENSGALG00000008143	10	-1	19102913	19118345	55720
XLOC_010361	+	2	126986018	127042368	ENSGALG00000022789	2	1	126740060	126929143	56875
XLOC_011194	-	2	126986272	127042373	ENSGALG00000022789	2	1	126740060	126929143	57129
XLOC_008852	-	18	2855131	2858651	ENSGALG00000001371	18	1	2773029	2797359	57772
XLOC_001108	+	1	171775837	171808972	ENSGALG00000019087	1	-1	171711512	171717479	58358
XLOC_010884	-	2	65833605	65895260	ENSGALG00000012808	2	-1	65668286	65773998	59607
XLOC_031121	+	Z	20610789	20611347	ENSGALG00000014769	Z	1	20512886	20551089	59700
XLOC_016933	-	3	72305601	72307984	ENSGALG00000015580	3	-1	72223196	72245883	59718
XLOC_031054	+	Z	9735877	9760096	ENSGALG00000003248	Z	1	9660188	9675175	60702
XLOC_018460	+	4	19646455	19675365	ENSGALG00000026230	4	-1	19706680	19707771	61316
XLOC_008931	-	18	9135831	9175271	ENSGALG00000004386	18	1	9067763	9073622	62209
XLOC_009835	+	2	30371528	30398986	ENSGALG00000019646	2	1	30307454	30309139	62389
XLOC_014051	-	23	1330840	1340396	ENSGALG00000000675	23	-1	1252540	1268219	62621
XLOC_018800	+	4	77773158	77795713	ENSGALG00000014954	4	-1	77832794	77836033	62875
XLOC_024115	+	8	1923719	1967568	ENSGALG00000021730	8	1	1986687	1986790	63071
XLOC_023333	+	7	30826845	30844532	ENSGALG00000012377	7	1	30750466	30763505	63340
XLOC_016944	-	3	75718410	75729798	ENSGALG00000015791	3	1	75777524	75782279	63869
XLOC_025172	+	9	13739524	13802321	ENSGALG00000007324	9	-1	13522136	13675334	64190
XLOC_031073	+	Z	13035170	13039182	ENSGALG00000014845	Z	-1	12879810	12970581	64589
XLOC_011160	-	2	120965488	120966965	ENSGALG00000015755	2	-1	120881814	120900516	64972
XLOC_018796	+	4	76521346	76523577	ENSGALG00000014516	4	-1	76407832	76456077	65269
XLOC_009938	+	2	45509067	45611763	ENSGALG00000012043	2	1	45413332	45443733	65334
XLOC_001006	+	1	143695671	143721668	ENSGALG00000016878	1	-1	143733211	143761072	65401
XLOC_020659	+	5	26415890	26430483	ENSGALG00000009381	5	-1	26239332	26350159	65731
XLOC_016260	+	3	75708207	75718090	ENSGALG00000019917	3	-1	75621239	75640693	67514
XLOC_016035	+	3	39198469	39206756	ENSGALG00000011065	3	-1	39093469	39130259	68210
XLOC_002393	-	1	176468265	176487128	ENSGALG00000027868	1	1	176394869	176399685	68580
XLOC_010088	+	2	68196964	68200327	ENSGALG00000012889	2	-1	68221924	68265700	68736
XLOC_009983	+	2	51252295	51262297	ENSGALG00000012327	2	-1	51170907	51183221	69074
XLOC_008219	+	17	107450	130521	ENSGALG00000014171	17	-1	1663	38146	69304
XLOC_025173	+	9	14204162	14223427	ENSGALG00000007357	9	1	14257892	14274166	70004
XLOC_000119	+	1	18739043	18757810	ENSGALG00000008551	1	1	18657758	18668817	70226
XLOC_021034	-	5	10855355	10917396	ENSGALG00000006074	5	-1	10549851	10784968	70387
XLOC_002082	-	1	109791384	109812336	ENSGALG00000016212	1	-1	109714790	109720919	70465
XLOC_022601	-	6	25922711	26080789	ENSGALG00000021879	6	1	25843835	25851639	71072
XLOC_023375	-	7	2129257	2150836	ENSGALG00000002689	7	-1	2193283	2200431	71174
XLOC_019378	-	4	69236277	69294181	ENSGALG00000000177	4	-1	69141181	69164821	71456
XLOC_018486	+	4	24344025	24346353	ENSGALG00000009573	4	1	24400386	24416023	71998
XLOC_015845	+	3	14377474	14387210	ENSGALG00000008830	3	-1	14447219	14450083	72609
XLOC_010873	-	2	63671852	63693920	ENSGALG00000022976	2	1	63540510	63597084	74768
XLOC_019464	-	4	84896289	84902400	ENSGALG00000015749	4	-1	84948881	84971108	74819
XLOC_005945	+	12	10868782	10878450	ENSGALG00000006389	12	-1	10941890	10944655	75873
XLOC_013858	-	22	3380430	3386358	ENSGALG00000000476	22	-1	3455032	3456588	76158
XLOC_031483	-	Z	9752073	9756393	ENSGALG00000003248	Z	1	9660188	9675175	76898
XLOC_018570	+	4	38512330	38518217	ENSGALG00000025163	4	1	38434799	38434868	77462
XLOC_019044	-	4	16119561	16337483	ENSGALG00000027937	4	1	16041514	16041654	77907
XLOC_008676	+	18	2458807	2466122	ENSGALG00000023608	18	-1	2535558	2536882	78075
XLOC_024620	-	8	21434868	21437606	ENSGALG00000027655	8	-1	21100766	21356721	78147
XLOC_025127	+	9	8429491	8448682	ENSGALG00000004966	9	1	8228460	8351304	78187
XLOC_025390	-	9	8429491	8671002	ENSGALG00000004966	9	1	8228460	8351304	78187
XLOC_009753	+	2	14735963	14737204	ENSGALG00000007331	2	-1	14597995	14657468	78495
XLOC_018844	+	4	84892582	84901623	ENSGALG00000015749	4	-1	84948881	84971108	78526
XLOC_004598	+	10	14652480	14657322	ENSGALG00000006981	10	1	14461079	14573856	78624
XLOC_001627	-	1	52191890	52215982	ENSGALG00000012557	1	-1	52086296	52112776	79114
XLOC_016649	-	3	24939354	24940644	ENSGALG00000009981	3	-1	24831731	24859714	79640
XLOC_025071	+	9	3337398	3349150	ENSGALG00000006609	9	1	3230463	3257134	80264
XLOC_010413	+	2	138956568	138991634	ENSGALG00000016310	2	-1	138873014	138876023	80545
XLOC_011263	-	2	138956568	138991912	ENSGALG00000016310	2	-1	138873014	138876023	80545
XLOC_016752	-	3	39210968	39226502	ENSGALG00000011065	3	-1	39093469	39130259	80709
XLOC_023470	-	7	14231202	14281199	ENSGALG00000009001	7	1	14281313	14312291	81089
XLOC_030874	+	LGE64	41388	69961	ENSGALG00000026046	LGE64	1	116549	122532	81144
XLOC_024201	+	8	10370167	10379755	ENSGALG00000005180	8	1	10153022	10288846	81321
XLOC_016036	+	3	39212286	39226502	ENSGALG00000011065	3	-1	39093469	39130259	82027
XLOC_022454	-	6	11650716	11655850	ENSGALG00000004794	6	-1	11556862	11568617	82099
XLOC_024344	+	8	24320137	24600570	ENSGALG00000010805	8	-1	24190573	24237937	82200
XLOC_012745	+	20	4279824	4286505	ENSGALG00000003658	20	1	4170739	4197326	82498
XLOC_000698	+	1	87189311	87199317	ENSGALG00000015364	1	-1	87085661	87106698	82613
XLOC_024655	-	8	24321270	24480229	ENSGALG00000010805	8	-1	24190573	24237937	83333
XLOC_030780	+	JH376407.1	21	73022	ENSGALG00000013852	JH376407.1	-1	80829	83418	83397
XLOC_008848	-	18	2452319	2507501	ENSGALG00000023608	18	-1	2535558	2536882	84563
XLOC_000554	+	1	72361804	72365880	ENSGALG00000022980	1	1	72273762	72277034	84770
XLOC_001958	-	1	87570087	87588619	ENSGALG00000015367	1	1	87611977	87655399	85312
XLOC_016877	-	3	61833644	61897108	ENSGALG00000028758	3	-1	61920136	61920236	86592
XLOC_010885	-	2	65920898	65944125	ENSGALG00000012809	2	1	65994143	66009335	88437
XLOC_001628	-	1	52259217	52289521	ENSGALG00000028574	1	1	52346738	52347832	88615
XLOC_020856	+	5	51984584	51989807	ENSGALG00000027407	5	-1	51879668	51895943	88641
XLOC_001082	+	1	169041371	169047051	ENSGALG00000017014	1	-1	169123118	169131188	89817
XLOC_031055	+	Z	9765620	9783784	ENSGALG00000003248	Z	1	9660188	9675175	90445
XLOC_000057	+	1	7001447	7006170	ENSGALG00000006656	1	-1	6744904	6910722	90725
XLOC_016937	-	3	74632600	74713852	ENSGALG00000015596	3	1	74490287	74540828	91772
XLOC_001361	-	1	13534937	13574793	ENSGALG00000008167	1	1	13575018	13627041	92104
XLOC_007320	-	14	5430999	5455368	ENSGALG00000005215	14	-1	5230050	5338554	92445
XLOC_010493	-	2	4139816	4152109	ENSGALG00000005644	2	1	4038249	4047178	92638
XLOC_022455	-	6	11661811	11682184	ENSGALG00000004794	6	-1	11556862	11568617	93194
XLOC_012741	+	20	3745544	3751609	ENSGALG00000003494	20	1	3645759	3650443	95101
XLOC_021224	-	5	30494802	30502726	ENSGALG00000027360	5	1	30589905	30590067	95265
XLOC_007984	-	15	10617741	10659889	ENSGALG00000028447	15	-1	10521590	10521680	96061
XLOC_010416	+	2	139418956	139429248	ENSGALG00000016308	2	1	139316928	139321894	97062
XLOC_016129	+	3	52445399	52451290	ENSGALG00000013813	3	1	52328376	52348100	97299
XLOC_009985	+	2	51636822	51638777	ENSGALG00000012332	2	1	51732434	51735213	98391
XLOC_010305	+	2	116619885	116627510	ENSGALG00000015622	2	-1	116629419	116718405	98520
XLOC_007817	+	15	12099630	12164857	ENSGALG00000008246	15	-1	12197004	12198222	98592
XLOC_025053	+	9	1651500	1694697	ENSGALG00000002169	9	-1	1740426	1751264	99764
XLOC_019379	-	4	69294760	69301615	ENSGALG00000013521	4	-1	69306051	69395624	100864
XLOC_010874	-	2	63698407	63770557	ENSGALG00000022976	2	1	63540510	63597084	101323
XLOC_009984	+	2	51632389	51634908	ENSGALG00000012332	2	1	51732434	51735213	102824
XLOC_002274	-	1	148539661	148552724	ENSGALG00000026361	1	-1	148640276	148643140	103479
XLOC_016679	-	3	29892295	29904350	ENSGALG00000010288	3	1	29786243	29787097	105198
XLOC_012947	-	20	4931703	4935754	ENSGALG00000003670	20	-1	5036695	5037630	105927
XLOC_002295	-	1	160951022	160966620	ENSGALG00000014545	1	-1	161024899	161059435	108413
XLOC_000235	+	1	43415540	43427966	ENSGALG00000011258	1	-1	43273706	43305815	109725
XLOC_031699	-	Z	44317250	44320295	ENSGALG00000015209	Z	-1	44205924	44207300	109950
XLOC_024348	+	8	25378648	25379677	ENSGALG00000010870	8	-1	25267213	25268157	110491
XLOC_030873	+	LGE64	11959	15928	ENSGALG00000026046	LGE64	1	116549	122532	110573
XLOC_025072	+	9	3368313	3396873	ENSGALG00000006609	9	1	3230463	3257134	111179
XLOC_025332	-	9	3369758	3396873	ENSGALG00000006609	9	1	3230463	3257134	112624
XLOC_002163	-	1	125754802	125762005	ENSGALG00000016622	1	-1	125766037	125867934	113132
XLOC_001502	-	1	42326787	42394551	ENSGALG00000028360	1	-1	42095834	42213439	113348
XLOC_025235	+	9	17391167	17399960	ENSGALG00000013837	9	1	17416496	17505171	114004
XLOC_016359	+	3	97563478	97619466	ENSGALG00000016457	3	1	97427885	97448910	114568
XLOC_025128	+	9	8466427	8544052	ENSGALG00000004966	9	1	8228460	8351304	115123
XLOC_012941	-	20	3853814	3877628	ENSGALG00000003503	20	-1	3952514	3969262	115448
XLOC_007815	+	15	11555742	11561185	ENSGALG00000008219	15	1	11434073	11439615	116127
XLOC_010851	-	2	59824221	59826003	ENSGALG00000012681	2	1	59654813	59707760	116461
XLOC_021458	-	5	59276822	59291803	ENSGALG00000012505	5	-1	59384568	59393956	117134
XLOC_002316	-	1	166678612	166683037	ENSGALG00000016971	1	-1	166717963	166796518	117906
XLOC_010029	+	2	59827201	59966328	ENSGALG00000012681	2	1	59654813	59707760	119441
XLOC_016680	-	3	29908054	29976839	ENSGALG00000010288	3	1	29786243	29787097	120957
XLOC_010399	+	2	136831595	136864963	ENSGALG00000016394	2	-1	136937865	136952782	121187
XLOC_017046	-	3	100910402	100918121	ENSGALG00000016475	3	1	101015648	101031602	121200
XLOC_010656	-	2	32508177	32511548	ENSGALG00000011046	2	1	32350696	32384116	124061
XLOC_031238	+	Z	43718321	43725384	ENSGALG00000028005	Z	1	43589019	43592114	126207
XLOC_008006	-	15	12070790	12085136	ENSGALG00000008246	15	-1	12197004	12198222	127432
XLOC_001014	+	1	144939340	145018693	ENSGALG00000025906	1	-1	144810733	144811489	127851
XLOC_016537	-	3	10579983	10582980	ENSGALG00000008774	3	1	10359052	10449924	130059
XLOC_001761	-	1	71239742	71272124	ENSGALG00000018240	1	1	71371150	71371225	131483
XLOC_015932	+	3	25043904	25058356	ENSGALG00000028950	3	1	25175906	25176177	132273
XLOC_001632	-	1	52481084	52488913	ENSGALG00000028574	1	1	52346738	52347832	133252
XLOC_009880	+	2	35640742	35663628	ENSGALG00000011254	2	-1	35683544	35774433	133691
XLOC_010704	-	2	35640730	35655228	ENSGALG00000011254	2	-1	35683544	35774433	133703
XLOC_020540	+	5	14891875	15022403	ENSGALG00000006841	5	1	15024205	15025600	133725
XLOC_016925	-	3	68000303	68037113	ENSGALG00000015388	3	-1	67757131	67863760	136543
XLOC_009736	+	2	10136988	10188961	ENSGALG00000006652	2	-1	9899531	9999771	137217
XLOC_001043	+	1	164759873	164777355	ENSGALG00000016943	1	-1	164871751	164897395	137522
XLOC_009939	+	2	45704919	45709962	ENSGALG00000012002	2	1	45843712	45844704	139785
XLOC_001346	-	1	10674259	10689437	ENSGALG00000008461	1	1	10471388	10534407	139852
XLOC_007816	+	15	12057688	12085408	ENSGALG00000008246	15	-1	12197004	12198222	140534
XLOC_001081	+	1	168987718	169019012	ENSGALG00000017014	1	-1	169123118	169131188	143470
XLOC_002339	-	1	168987718	169019012	ENSGALG00000017014	1	-1	169123118	169131188	143470
XLOC_022462	-	6	13994002	14110195	ENSGALG00000004994	6	1	14134965	14137931	143929
XLOC_004774	-	10	8035373	8037881	ENSGALG00000021321	10	-1	8174137	8180628	145255
XLOC_021297	-	5	39370278	39388243	ENSGALG00000010518	5	1	38796212	39223738	146540
XLOC_001491	-	1	38998035	39001280	ENSGALG00000010311	1	1	38593310	38850635	147400
XLOC_010853	-	2	60209844	60216276	ENSGALG00000012683	2	-1	60324506	60357712	147868
XLOC_010032	+	2	60209304	60220091	ENSGALG00000012683	2	-1	60324506	60357712	148408
XLOC_000753	+	1	97804723	97817003	ENSGALG00000015681	1	-1	97651374	97654841	149882
XLOC_031359	+	Z	70008685	70036401	ENSGALG00000021452	Z	-1	70159050	70159861	151176
XLOC_016224	+	3	68066837	68072661	ENSGALG00000015405	3	1	68127684	68220253	153416
XLOC_018833	+	4	83180923	83185562	ENSGALG00000015708	4	-1	82973161	83026374	154549
XLOC_000746	+	1	95148631	95186484	ENSGALG00000025630	1	-1	94992672	94992743	155888
XLOC_031725	-	Z	48351995	48364953	ENSGALG00000028494	Z	1	48508022	48508131	156136
XLOC_004831	-	10	14912167	14917940	ENSGALG00000028916	10	1	14755702	14755846	156321
XLOC_021357	-	5	49173854	49181338	ENSGALG00000011260	5	1	49283997	49330671	156817
XLOC_012747	+	20	4880438	4921952	ENSGALG00000003670	20	-1	5036695	5037630	157192
XLOC_012946	-	20	4880438	4921952	ENSGALG00000003670	20	-1	5036695	5037630	157192
XLOC_005973	+	12	12093059	12104539	ENSGALG00000007168	12	-1	11869223	11932886	160173
XLOC_024656	-	8	24483078	24507153	ENSGALG00000010818	8	-1	24600649	24643425	160347
XLOC_021457	-	5	58913951	58915371	ENSGALG00000012489	5	1	58742902	58750216	163735
XLOC_001920	-	1	81898960	82235194	ENSGALG00000015089	1	-1	81680485	81734254	164706
XLOC_000087	+	1	13392121	13519601	ENSGALG00000008175	1	-1	13157747	13226609	165512
XLOC_016223	+	3	68031527	68059156	ENSGALG00000015388	3	-1	67757131	67863760	167767
XLOC_020918	+	5	58918034	58947640	ENSGALG00000012489	5	1	58742902	58750216	167818
XLOC_023279	+	7	22266776	22272835	ENSGALG00000025739	7	-1	22092637	22098817	167959
XLOC_023563	-	7	22266919	22272835	ENSGALG00000025739	7	-1	22092637	22098817	168102
XLOC_000754	+	1	97823853	97826619	ENSGALG00000015681	1	-1	97651374	97654841	169012
XLOC_002015	-	1	103058504	103077488	ENSGALG00000027781	1	-1	103227959	103228104	169600
XLOC_005974	+	12	12105046	12111274	ENSGALG00000007168	12	-1	11869223	11932886	172160
XLOC_016876	-	3	61747697	61777548	ENSGALG00000028758	3	-1	61920136	61920236	172539
XLOC_010859	-	2	60963802	61036178	ENSGALG00000027133	2	1	60775850	60790940	172862
XLOC_016376	+	3	103159478	103179654	ENSGALG00000026402	3	-1	102982272	102982477	177001
XLOC_002001	-	1	97851495	97852881	ENSGALG00000015693	1	1	97936529	98030131	178636
XLOC_016644	-	3	24151250	24332478	ENSGALG00000009928	3	-1	23937632	23971796	179454
XLOC_011125	-	2	114317749	114369452	ENSGALG00000000062	2	-1	114472659	114503139	185390
XLOC_017019	-	3	93045679	93057819	ENSGALG00000016385	3	-1	93169719	93232027	186348
XLOC_024392	-	8	317557	628835	ENSGALG00000021244	8	-1	118970	130833	186724
XLOC_010852	-	2	59895400	59897304	ENSGALG00000012681	2	1	59654813	59707760	187640
XLOC_004603	+	10	15562949	15832047	ENSGALG00000027522	10	1	15374883	15375051	187898
XLOC_016357	+	3	97232300	97236397	ENSGALG00000016456	3	1	96971362	97044067	188233
XLOC_023321	+	7	28680476	28689793	ENSGALG00000012156	7	-1	28692505	28874290	193814
XLOC_019084	-	4	20558316	20564034	ENSGALG00000009373	4	-1	20356529	20364123	194193
XLOC_002280	-	1	152940678	152948945	ENSGALG00000016912	1	1	153125273	153143030	202352
XLOC_031436	-	Z	6003432	6012034	ENSGALG00000018499	Z	1	6016209	6212212	208780
XLOC_002247	-	1	141707811	141740080	ENSGALG00000016858	1	1	141914133	141925460	217649
XLOC_015926	+	3	24264463	24290586	ENSGALG00000009932	3	-1	24334429	24485868	221405
XLOC_001990	-	1	94413313	94452814	ENSGALG00000015506	1	1	94474405	94635350	222037
XLOC_016611	-	3	19450855	19519253	ENSGALG00000009645	3	1	19553878	19675355	224500
XLOC_005558	-	11	13098361	13166008	ENSGALG00000005347	11	-1	13255162	13323250	224889
XLOC_009996	+	2	53244122	53248105	ENSGALG00000012369	2	-1	52757783	53010513	233609
XLOC_024674	-	8	25942029	25943077	ENSGALG00000010924	8	1	25948005	26179911	237882
XLOC_025316	-	9	1484871	1576761	ENSGALG00000002155	9	-1	1075334	1241140	243731
XLOC_002107	-	1	113936337	113949575	ENSGALG00000022792	1	-1	113688262	113692283	244054
XLOC_031877	-	Z	79059988	79125920	ENSGALG00000008237	Z	-1	78775850	78810508	249480
XLOC_002246	-	1	141675144	141683465	ENSGALG00000016858	1	1	141914133	141925460	250316
XLOC_016826	-	3	52599380	52638918	ENSGALG00000013813	3	1	52328376	52348100	251280
XLOC_010246	+	2	104817159	104844063	ENSGALG00000015132	2	-1	104449184	104562821	254338
XLOC_022088	+	6	792344	917245	ENSGALG00000001870	6	1	452392	518973	273371
XLOC_001033	+	1	154763663	154772082	ENSGALG00000016926	1	1	154791543	155045502	281839
XLOC_010030	+	2	59989943	59994160	ENSGALG00000012681	2	1	59654813	59707760	282183
XLOC_012746	+	20	4743982	4749090	ENSGALG00000003670	20	-1	5036695	5037630	293648
XLOC_002294	-	1	160763610	160768406	ENSGALG00000014545	1	-1	161024899	161059435	295825
XLOC_010031	+	2	60046795	60053585	ENSGALG00000012683	2	-1	60324506	60357712	310917
XLOC_023624	-	7	33229624	33364251	ENSGALG00000012440	7	-1	32812269	32916777	312847
XLOC_023337	+	7	33229775	33308641	ENSGALG00000012440	7	-1	32812269	32916777	312998
XLOC_017038	-	3	97771330	97779623	ENSGALG00000016457	3	1	97427885	97448910	322420
XLOC_016360	+	3	97771681	97776770	ENSGALG00000016457	3	1	97427885	97448910	322771
XLOC_016229	+	3	68894495	68896113	ENSGALG00000026120	3	1	69233553	69233659	339164
XLOC_001863	-	1	80841679	80850246	ENSGALG00000028743	1	-1	81181695	81181838	340159
XLOC_002448	-	1	186432288	186442102	ENSGALG00000028591	1	1	186778683	186778781	346493
XLOC_002278	-	1	151519930	151539037	ENSGALG00000016906	1	1	151896142	151897919	377989
XLOC_011082	-	2	105245327	105335967	ENSGALG00000015140	2	-1	105634159	105655438	410111
XLOC_018497	+	4	25975592	26054853	ENSGALG00000009719	4	1	26355293	26387417	411825
XLOC_019104	-	4	25975592	26055551	ENSGALG00000009719	4	1	26355293	26387417	411825
XLOC_020780	+	5	40897517	40905321	ENSGALG00000017934	5	-1	40485051	40485152	412365
XLOC_018496	+	4	25914970	25918145	ENSGALG00000009719	4	1	26355293	26387417	472447
XLOC_000075	+	1	11754523	11789090	ENSGALG00000008353	1	1	11930694	12230824	476301
XLOC_001989	-	1	93671966	93681201	ENSGALG00000025177	1	-1	93185199	93185283	486683
XLOC_016703	-	3	32342656	32435870	ENSGALG00000010599	3	-1	32847237	32854255	511599
XLOC_002300	-	1	163616648	163651586	ENSGALG00000029031	1	-1	163083292	163083448	533200
XLOC_001964	-	1	89842101	89845876	ENSGALG00000015414	1	1	89128983	89150210	691891
XLOC_018586	+	4	40532681	40601327	ENSGALG00000010706	4	-1	39503734	39814734	717947
XLOC_000037	+	1	3206712	3342149	ENSGALG00000018235	1	1	3329690	3329778	overlap
XLOC_000174	+	1	31261622	31279704	ENSGALG00000025128	1	1	31272435	31272508	overlap
XLOC_000281	+	1	47932398	47993594	ENSGALG00000011747	1	1	47926959	48009693	overlap
XLOC_000283	+	1	47944539	47959737	ENSGALG00000011747	1	1	47926959	48009693	overlap
XLOC_000542	+	1	71170096	71384220	ENSGALG00000018240	1	1	71371150	71371225	overlap
XLOC_000548	+	1	71640159	71641980	ENSGALG00000012921	1	1	71620386	71749352	overlap
XLOC_001542	-	1	47928886	47953368	ENSGALG00000011747	1	1	47926959	48009693	overlap
XLOC_001544	-	1	47932399	47993698	ENSGALG00000011747	1	1	47926959	48009693	overlap
XLOC_001547	-	1	47979670	47980790	ENSGALG00000011747	1	1	47926959	48009693	overlap
XLOC_001961	-	1	88153339	88160488	ENSGALG00000015400	1	-1	88157163	88157665	overlap
XLOC_002467	-	1	189735110	189737405	ENSGALG00000000188	1	-1	189735110	189737405	overlap
XLOC_009721	+	2	6737067	6755144	ENSGALG00000029137	2	1	6741175	6741280	overlap
XLOC_009970	+	2	49689389	49691069	ENSGALG00000019602	2	-1	49671235	49698316	overlap
XLOC_009971	+	2	49691938	49697519	ENSGALG00000019602	2	-1	49671235	49698316	overlap
XLOC_010380	+	2	129785469	129825668	ENSGALG00000016077	2	-1	129771364	129835051	overlap
XLOC_010580	-	2	19882029	19978882	ENSGALG00000008720	2	1	19881822	19979217	overlap
XLOC_010654	-	2	32242649	32255309	ENSGALG00000018281	2	-1	32253587	32253654	overlap
XLOC_011192	-	2	126663595	126675596	ENSGALG00000027894	2	-1	126667022	126667101	overlap
XLOC_011279	-	2	142221859	142250728	ENSGALG00000018290	2	-1	142229501	142229564	overlap
XLOC_016264	+	3	76267686	76281574	ENSGALG00000025086	3	1	76273207	76273277	overlap
XLOC_016297	+	3	81743267	81787066	ENSGALG00000018319	3	1	81754480	81754552	overlap
XLOC_016515	-	3	8375924	8377407	ENSGALG00000009024	3	-1	8368923	8408079	overlap
XLOC_017053	-	3	101353532	101360152	ENSGALG00000016484	3	-1	101358903	101359404	overlap
XLOC_022315	+	6	27350567	27391685	ENSGALG00000009048	6	-1	27359430	27532008	overlap
XLOC_024116	+	8	1967633	1987044	ENSGALG00000021726	8	1	1986876	1986964	overlap
XLOC_024178	+	8	7391268	7398690	ENSGALG00000017870	8	1	7393134	7393217	overlap
XLOC_025051	+	9	1078633	1240890	ENSGALG00000002155	9	-1	1075334	1241140	overlap
XLOC_025296	+	9	23420332	23425232	ENSGALG00000010441	9	-1	23410228	23425241	overlap
XLOC_005292	+	11	4641797	4663505	ENSGALG00000017903	11	1	4657953	4658059	overlap
XLOC_005497	-	11	2659793	2660911	ENSGALG00000003330	11	-1	2659793	2660911	overlap
XLOC_006105	-	12	6073945	6085957	ENSGALG00000018264	12	-1	6076930	6077032	overlap
XLOC_006694	-	13	7136406	7147779	ENSGALG00000018267	13	-1	7137989	7138087	overlap
XLOC_006708	-	13	7832900	7843018	ENSGALG00000028070	13	-1	7834129	7834216	overlap
XLOC_008281	+	17	5033119	5036262	ENSGALG00000004852	17	-1	5016759	5075578	overlap
XLOC_008801	+	18	10395591	10406788	ENSGALG00000007386	18	-1	10393676	10406868	overlap
XLOC_009150	+	19	4186054	4195677	ENSGALG00000001905	19	-1	4183024	4205214	overlap
XLOC_012774	+	20	6811264	6817419	ENSGALG00000017840	20	1	6814693	6814787	overlap
XLOC_013531	-	21	2593680	2631453	ENSGALG00000018294	21	-1	2597927	2598013	overlap
XLOC_014091	-	23	2505952	2509395	ENSGALG00000017843	23	-1	2507396	2507530	overlap
XLOC_014400	-	24	4755388	4822236	ENSGALG00000026265	24	-1	4779927	4780036	overlap
XLOC_014872	-	26	1589153	1608553	ENSGALG00000018307	26	-1	1591918	1592000	overlap
XLOC_028581	+	AADN03022685.1	410	1102	ENSGALG00000025794	AADN03022685.1	1	980	1102	overlap
XLOC_030122	+	JH375727.1	36977	43661	ENSGALG00000018343	JH375727.1	1	39002	39078	overlap
XLOC_030942	-	W	483270	485124	ENSGALG00000028625	W	-1	483270	485124	overlap
XLOC_030975	+	Z	748068	766816	ENSGALG00000018340	Z	1	761054	761130	overlap
XLOC_031088	+	Z	15809565	15819700	ENSGALG00000028394	Z	1	15818871	15818979	overlap
XLOC_031704	-	Z	44742178	44756517	ENSGALG00000025544	Z	-1	44756224	44756333	overlap
XLOC_025823	-	AADN03009281.1	37	1264
XLOC_025842	-	AADN03009332.1	1686	8284
XLOC_025853	+	AADN03009361.1	2	1031
XLOC_025890	-	AADN03009500.1	1	802
XLOC_025917	+	AADN03009588.1	247	912
XLOC_025944	+	AADN03009675.1	1	841
XLOC_025949	-	AADN03009718.1	70	643
XLOC_025962	+	AADN03009794.1	12890	19763
XLOC_025984	-	AADN03009896.1	1	1346
XLOC_025987	-	AADN03009901.1	1103	6247
XLOC_026085	-	AADN03010349.1	1	650
XLOC_026087	+	AADN03010356.1	1	557
XLOC_026127	-	AADN03010466.1	3	585
XLOC_026169	+	AADN03010624.1	490	2413
XLOC_026179	+	AADN03010660.1	43	1563
XLOC_026184	-	AADN03010674.1	18	887
XLOC_026188	+	AADN03010686.1	132	973
XLOC_026193	-	AADN03010718.1	82	1358
XLOC_026197	-	AADN03010736.1	28	1216
XLOC_026209	-	AADN03010783.1	54	646
XLOC_026210	-	AADN03010785.1	174	739
XLOC_026221	-	AADN03010813.1	3	958
XLOC_026242	+	AADN03010861.1	81	836
XLOC_026254	+	AADN03010881.1	677	1292
XLOC_026262	-	AADN03010901.1	8	1159
XLOC_026269	-	AADN03010924.1	1	798
XLOC_026274	-	AADN03010946.1	185	664
XLOC_026278	-	AADN03010958.1	3	759
XLOC_026279	-	AADN03010959.1	1	743
XLOC_026287	+	AADN03010994.1	1	14919
XLOC_026288	-	AADN03010994.1	1	7694
XLOC_026305	-	AADN03011115.1	45	745
XLOC_026313	-	AADN03011133.1	49	890
XLOC_026327	+	AADN03011165.1	78	1081
XLOC_026328	-	AADN03011165.1	78	1081
XLOC_026330	-	AADN03011174.1	60	26221
XLOC_026342	-	AADN03011208.1	431	3967
XLOC_026345	+	AADN03011213.1	223	717
XLOC_026347	+	AADN03011227.1	617	16008
XLOC_026348	+	AADN03011227.1	1059	10425
XLOC_026351	-	AADN03011264.1	243	7252
XLOC_026357	-	AADN03011290.1	73	4177
XLOC_026380	-	AADN03011468.1	153	1092
XLOC_026384	-	AADN03011494.1	71	2410
XLOC_026413	-	AADN03011637.1	8	7653
XLOC_026419	-	AADN03011654.1	37	2240
XLOC_026421	-	AADN03011675.1	61	1342
XLOC_026430	+	AADN03011713.1	216	992
XLOC_026439	-	AADN03011783.1	10	1153
XLOC_026444	+	AADN03011800.1	220	1122
XLOC_026447	+	AADN03011814.1	243	1463
XLOC_026452	+	AADN03011847.1	426	5501
XLOC_026453	-	AADN03011848.1	83	1250
XLOC_026464	+	AADN03011918.1	670	4213
XLOC_026476	+	AADN03011983.1	26	1142
XLOC_026484	+	AADN03012036.1	397	5998
XLOC_026485	-	AADN03012036.1	443	5877
XLOC_026507	-	AADN03012127.1	135	444
XLOC_026509	-	AADN03012137.1	764	1573
XLOC_026513	+	AADN03012170.1	48	1137
XLOC_026517	+	AADN03012183.1	6	1139
XLOC_026521	-	AADN03012204.1	9	5932
XLOC_026524	+	AADN03012221.1	598	1277
XLOC_026536	-	AADN03012270.1	35	533
XLOC_026569	+	AADN03012428.1	245	1548
XLOC_026570	-	AADN03012428.1	964	2316
XLOC_026571	+	AADN03012433.1	3	1063
XLOC_026591	-	AADN03012517.1	402	1179
XLOC_026607	+	AADN03012593.1	50	4294
XLOC_026608	-	AADN03012601.1	1	859
XLOC_026631	+	AADN03012771.1	4	1229
XLOC_026633	-	AADN03012776.1	30	1428
XLOC_026634	-	AADN03012779.1	614	1260
XLOC_026635	-	AADN03012801.1	446	1589
XLOC_026638	+	AADN03012814.1	1273	23440
XLOC_026639	-	AADN03012814.1	5282	23426
XLOC_026656	-	AADN03012882.1	1	5333
XLOC_026670	+	AADN03012927.1	22	1449
XLOC_026678	-	AADN03012994.1	1540	2543
XLOC_026680	+	AADN03013003.1	1	825
XLOC_026696	-	AADN03013079.1	1	1168
XLOC_026705	+	AADN03013135.1	9	7817
XLOC_026708	+	AADN03013155.1	12	1172
XLOC_026732	+	AADN03013260.1	3	1317
XLOC_026755	+	AADN03013357.1	1667	3867
XLOC_026756	-	AADN03013357.1	1672	3867
XLOC_026783	+	AADN03013494.1	10	1017
XLOC_026790	+	AADN03013530.1	87	1405
XLOC_026791	-	AADN03013530.1	173	1403
XLOC_026803	+	AADN03013605.1	17	1025
XLOC_026818	+	AADN03013687.1	27	1584
XLOC_026821	+	AADN03013701.1	237	1200
XLOC_026830	-	AADN03013753.1	475	1626
XLOC_026859	+	AADN03013900.1	18	1885
XLOC_026863	+	AADN03013921.1	6	2725
XLOC_026864	-	AADN03013930.1	1	1365
XLOC_026918	-	AADN03014226.1	67	1483
XLOC_026952	+	AADN03014400.1	482	1778
XLOC_026954	+	AADN03014401.1	1	1363
XLOC_026956	+	AADN03014413.1	11	2686
XLOC_026974	+	AADN03014494.1	2	1037
XLOC_026975	-	AADN03014494.1	2	1037
XLOC_026987	+	AADN03014548.1	1	1320
XLOC_026988	-	AADN03014548.1	1	1259
XLOC_026997	-	AADN03014610.1	69	1115
XLOC_027000	+	AADN03014624.1	145	1830
XLOC_027001	-	AADN03014624.1	337	2323
XLOC_027006	+	AADN03014646.1	8	2067
XLOC_027008	-	AADN03014656.1	232	768
XLOC_027013	-	AADN03014671.1	268	1372
XLOC_027017	-	AADN03014700.1	40	2212
XLOC_027019	-	AADN03014732.1	1	586
XLOC_027023	+	AADN03014760.1	4546	7658
XLOC_027036	+	AADN03014815.1	488	1463
XLOC_027037	-	AADN03014823.1	1003	5566
XLOC_027050	+	AADN03014895.1	5233	15730
XLOC_027066	+	AADN03014964.1	50	1007
XLOC_027069	-	AADN03014976.1	141	1801
XLOC_027083	-	AADN03015076.1	26	1296
XLOC_027089	+	AADN03015097.1	64	1526
XLOC_027108	+	AADN03015199.1	2970	5111
XLOC_027122	-	AADN03015264.1	50	2814
XLOC_027126	+	AADN03015285.1	288	2065
XLOC_027127	-	AADN03015285.1	1	2065
XLOC_027130	-	AADN03015312.1	656	1362
XLOC_027139	+	AADN03015345.1	248	1072
XLOC_027142	-	AADN03015347.1	1	371
XLOC_027144	+	AADN03015353.1	4045	6883
XLOC_027149	-	AADN03015359.1	1	10807
XLOC_027179	+	AADN03015494.1	1	1284
XLOC_027184	+	AADN03015546.1	1	1294
XLOC_027195	-	AADN03015584.1	909	1957
XLOC_027196	-	AADN03015586.1	1	1491
XLOC_027217	+	AADN03015686.1	554	3080
XLOC_027229	+	AADN03015750.1	279	1051
XLOC_027233	+	AADN03015771.1	149	840
XLOC_027235	+	AADN03015789.1	1	1664
XLOC_027256	-	AADN03015866.1	64	1789
XLOC_027268	+	AADN03015948.1	9	1387
XLOC_027272	-	AADN03015972.1	699	1423
XLOC_027276	-	AADN03015983.1	3	2075
XLOC_027285	+	AADN03016014.1	1	1046
XLOC_027290	-	AADN03016053.1	4	1032
XLOC_027306	+	AADN03016162.1	398	1202
XLOC_027315	+	AADN03016205.1	35	1085
XLOC_027320	+	AADN03016256.1	94	2237
XLOC_027321	-	AADN03016256.1	28	2229
XLOC_027326	+	AADN03016304.1	50	1082
XLOC_027327	-	AADN03016304.1	30	1108
XLOC_027328	-	AADN03016306.1	42	1010
XLOC_027337	+	AADN03016328.1	25	2329
XLOC_027338	-	AADN03016328.1	14	4808
XLOC_027346	-	AADN03016356.1	602	1237
XLOC_027357	-	AADN03016412.1	845	1220
XLOC_027365	+	AADN03016457.1	691	1201
XLOC_027373	-	AADN03016517.1	6	7450
XLOC_027435	+	AADN03016836.1	1	1151
XLOC_027439	-	AADN03016868.1	40	1264
XLOC_027442	+	AADN03016874.1	213	2252
XLOC_027454	+	AADN03016960.1	2	1340
XLOC_027455	-	AADN03016960.1	2	1346
XLOC_027475	-	AADN03017067.1	2	1079
XLOC_027506	+	AADN03017200.1	1	615
XLOC_027507	-	AADN03017200.1	1	615
XLOC_027518	+	AADN03017252.1	119	1290
XLOC_027530	+	AADN03017326.1	17	1931
XLOC_027531	-	AADN03017326.1	1080	2100
XLOC_027544	+	AADN03017387.1	46	1412
XLOC_027549	-	AADN03017401.1	130	1253
XLOC_027552	+	AADN03017409.1	494	1219
XLOC_027564	-	AADN03017480.1	1	875
XLOC_027577	+	AADN03017561.1	2	1233
XLOC_027578	-	AADN03017561.1	2	1209
XLOC_027582	+	AADN03017577.1	1	1049
XLOC_027586	-	AADN03017605.1	1	1429
XLOC_027588	-	AADN03017609.1	71	957
XLOC_027605	-	AADN03017676.1	70	997
XLOC_027622	-	AADN03017759.1	1	870
XLOC_027624	+	AADN03017763.1	476	1161
XLOC_027631	+	AADN03017778.1	721	1126
XLOC_027637	+	AADN03017817.1	1	788
XLOC_027643	-	AADN03017845.1	165	1050
XLOC_027687	+	AADN03018097.1	1	1083
XLOC_027688	-	AADN03018097.1	1	1090
XLOC_027690	-	AADN03018107.1	199	1024
XLOC_027692	+	AADN03018124.1	196	3637
XLOC_027709	-	AADN03018177.1	630	1650
XLOC_027732	-	AADN03018308.1	2	1237
XLOC_027734	+	AADN03018323.1	318	2388
XLOC_027738	+	AADN03018338.1	2	1086
XLOC_027739	-	AADN03018338.1	2	1086
XLOC_027741	+	AADN03018350.1	9	1075
XLOC_027757	+	AADN03018446.1	1	1745
XLOC_027758	-	AADN03018446.1	1	1746
XLOC_027762	+	AADN03018460.1	4	998
XLOC_027773	-	AADN03018508.1	86	1772
XLOC_027781	-	AADN03018537.1	99	732
XLOC_027811	+	AADN03018718.1	315	1217
XLOC_027817	+	AADN03018734.1	625	2167
XLOC_027818	-	AADN03018734.1	591	2556
XLOC_027822	-	AADN03018759.1	866	1469
XLOC_027824	+	AADN03018763.1	134	1421
XLOC_027836	-	AADN03018827.1	110	960
XLOC_027842	+	AADN03018892.1	4	1002
XLOC_027848	-	AADN03018910.1	1	1052
XLOC_027856	+	AADN03018942.1	80	1201
XLOC_027871	-	AADN03019014.1	2	1204
XLOC_027891	+	AADN03019107.1	1	1397
XLOC_027892	-	AADN03019107.1	1	1397
XLOC_027901	+	AADN03019139.1	354	1326
XLOC_027907	+	AADN03019159.1	1496	3280
XLOC_027908	-	AADN03019161.1	12	469
XLOC_027927	-	AADN03019225.1	1	1338
XLOC_027931	+	AADN03019236.1	198	1220
XLOC_027944	+	AADN03019312.1	48	1096
XLOC_027964	-	AADN03019442.1	2	1109
XLOC_027967	+	AADN03019450.1	248	1044
XLOC_028014	+	AADN03019688.1	167	1020
XLOC_028016	+	AADN03019694.1	17	1255
XLOC_028042	+	AADN03019847.1	1	836
XLOC_028043	-	AADN03019848.1	45	1307
XLOC_028059	-	AADN03019962.1	349	1204
XLOC_028066	+	AADN03020007.1	70	1550
XLOC_028067	-	AADN03020007.1	2	1581
XLOC_028105	+	AADN03020149.1	584	1782
XLOC_028106	+	AADN03020150.1	37	1450
XLOC_028107	-	AADN03020150.1	330	1488
XLOC_028109	+	AADN03020160.1	771	1083
XLOC_028111	-	AADN03020193.1	38	1040
XLOC_028120	+	AADN03020249.1	291	1386
XLOC_028123	-	AADN03020255.1	91	1190
XLOC_028143	+	AADN03020344.1	243	1110
XLOC_028149	+	AADN03020375.1	28	1035
XLOC_028150	-	AADN03020381.1	9	682
XLOC_028157	-	AADN03020419.1	2	923
XLOC_028181	-	AADN03020556.1	58	1291
XLOC_028188	-	AADN03020608.1	155	933
XLOC_028189	-	AADN03020614.1	17	1342
XLOC_028192	-	AADN03020657.1	90	960
XLOC_028210	+	AADN03020759.1	1	1597
XLOC_028211	+	AADN03020766.1	577	1656
XLOC_028237	+	AADN03020919.1	132	1629
XLOC_028247	-	AADN03020969.1	4	1182
XLOC_028263	-	AADN03021045.1	257	1632
XLOC_028265	-	AADN03021057.1	51	3201
XLOC_028282	+	AADN03021127.1	1	1134
XLOC_028292	-	AADN03021184.1	33	995
XLOC_028297	+	AADN03021214.1	168	1327
XLOC_028304	-	AADN03021235.1	17	1114
XLOC_028308	+	AADN03021250.1	561	1852
XLOC_028317	+	AADN03021307.1	10	804
XLOC_028321	+	AADN03021337.1	32	1511
XLOC_028323	-	AADN03021347.1	654	960
XLOC_028325	+	AADN03021349.1	2	1191
XLOC_028326	-	AADN03021349.1	2	1185
XLOC_028329	+	AADN03021378.1	249	724
XLOC_028343	+	AADN03021459.1	419	1574
XLOC_028344	-	AADN03021459.1	255	1574
XLOC_028345	-	AADN03021461.1	9	1157
XLOC_028375	+	AADN03021594.1	1	1233
XLOC_028378	+	AADN03021613.1	58	1725
XLOC_028396	+	AADN03021718.1	212	1080
XLOC_028414	-	AADN03021854.1	1590	3669
XLOC_028428	+	AADN03021921.1	325	1206
XLOC_028444	-	AADN03021962.1	235	1294
XLOC_028464	+	AADN03022087.1	9	1278
XLOC_028465	-	AADN03022087.1	9	1278
XLOC_028472	+	AADN03022132.1	1042	5538
XLOC_028504	-	AADN03022263.1	1	925
XLOC_028535	-	AADN03022412.1	361	2651
XLOC_028539	+	AADN03022440.1	181	996
XLOC_028540	-	AADN03022440.1	181	1876
XLOC_028542	+	AADN03022444.1	27	870
XLOC_028552	+	AADN03022506.1	2	1081
XLOC_028572	-	AADN03022638.1	174	1025
XLOC_028584	+	AADN03022696.1	438	1443
XLOC_028613	+	AADN03022821.1	1	1094
XLOC_028624	-	AADN03022849.1	597	1213
XLOC_028629	+	AADN03022889.1	50	1690
XLOC_028638	-	AADN03022960.1	46	1060
XLOC_028668	-	AADN03023107.1	815	1883
XLOC_028673	+	AADN03023126.1	7	1306
XLOC_028676	+	AADN03023146.1	1	1058
XLOC_028702	-	AADN03023329.1	154	1296
XLOC_028710	-	AADN03023364.1	2	1366
XLOC_028715	+	AADN03023405.1	146	731
XLOC_028725	-	AADN03023493.1	2	886
XLOC_028732	+	AADN03023517.1	154	1003
XLOC_028733	-	AADN03023517.1	154	1028
XLOC_028739	+	AADN03023529.1	937	1667
XLOC_028749	-	AADN03023613.1	107	2136
XLOC_028758	+	AADN03023674.1	17	1154
XLOC_028759	-	AADN03023674.1	17	1294
XLOC_028804	-	AADN03023936.1	51	967
XLOC_028810	+	AADN03023950.1	1	1112
XLOC_028817	-	AADN03023973.1	44	1072
XLOC_028818	+	AADN03023978.1	1252	5011
XLOC_028819	+	AADN03023991.1	50	1234
XLOC_028822	+	AADN03024003.1	110	1237
XLOC_028824	+	AADN03024012.1	660	1487
XLOC_028825	-	AADN03024012.1	1	1509
XLOC_028827	-	AADN03024020.1	384	1098
XLOC_028831	+	AADN03024037.1	654	1307
XLOC_028832	-	AADN03024037.1	709	1449
XLOC_028842	-	AADN03024089.1	31	1173
XLOC_028845	-	AADN03024096.1	1	1044
XLOC_028849	-	AADN03024111.1	31	1106
XLOC_028859	-	AADN03024141.1	284	2163
XLOC_028871	+	AADN03024216.1	1	2541
XLOC_028872	-	AADN03024216.1	6	2522
XLOC_028876	+	AADN03024228.1	395	1539
XLOC_028884	+	AADN03024263.1	21	923
XLOC_028885	-	AADN03024263.1	9	941
XLOC_028889	+	AADN03024272.1	319	695
XLOC_028895	-	AADN03024309.1	52	1317
XLOC_028904	-	AADN03024355.1	22	1161
XLOC_028909	+	AADN03024403.1	46	976
XLOC_028911	+	AADN03024416.1	15	821
XLOC_028952	+	AADN03024602.1	379	1099
XLOC_028962	-	AADN03024651.1	398	1326
XLOC_028966	+	AADN03024672.1	3136	9849
XLOC_028967	-	AADN03024678.1	41	1820
XLOC_028973	-	AADN03024709.1	336	916
XLOC_028974	-	AADN03024719.1	3	1369
XLOC_028986	+	AADN03024767.1	29	1861
XLOC_028987	-	AADN03024767.1	29	1861
XLOC_028997	-	AADN03024833.1	46	1214
XLOC_029003	-	AADN03024857.1	19	1239
XLOC_029016	+	AADN03024905.1	289	2417
XLOC_029036	+	AADN03024959.1	1	1700
XLOC_029048	+	AADN03025005.1	53	1183
XLOC_029058	-	AADN03025057.1	315	1504
XLOC_029087	+	AADN03025241.1	482	1342
XLOC_029096	-	AADN03025313.1	5	1009
XLOC_029100	+	AADN03025365.1	1107	1569
XLOC_029101	-	AADN03025366.1	5	1257
XLOC_029122	+	AADN03025458.1	304	668
XLOC_029136	+	AADN03025512.1	615	3486
XLOC_029151	+	AADN03025600.1	3	1602
XLOC_029160	-	AADN03025636.1	1	1119
XLOC_029172	+	AADN03025703.1	255	1081
XLOC_029173	+	AADN03025706.1	1	1115
XLOC_029174	-	AADN03025706.1	1	1115
XLOC_029175	+	AADN03025721.1	21203	47821
XLOC_029196	+	AADN03025833.1	2	1230
XLOC_029197	+	AADN03025837.1	42	1004
XLOC_029198	+	AADN03025842.1	84	1150
XLOC_029206	+	AADN03025857.1	433	861
XLOC_029223	-	AADN03025933.1	493	2972
XLOC_029227	+	AADN03025945.1	15	896
XLOC_029235	+	AADN03025992.1	3	1075
XLOC_029236	+	AADN03025993.1	1	1320
XLOC_029238	+	AADN03025998.1	121	954
XLOC_029269	+	AADN03026149.1	208	5616
XLOC_029272	+	AADN03026185.1	146	1209
XLOC_029277	-	AADN03026219.1	122	811
XLOC_029306	+	AADN03026404.1	2	1127
XLOC_029307	-	AADN03026404.1	1	1127
XLOC_029323	-	AADN03026467.1	14	1010
XLOC_029324	+	AADN03026468.1	64	1441
XLOC_029327	+	AADN03026497.1	44	1461
XLOC_029332	+	AADN03026525.1	161	1022
XLOC_029340	+	AADN03026543.1	143	594
XLOC_029343	-	AADN03026550.1	31	1074
XLOC_029351	-	AADN03026593.1	631	1337
XLOC_029366	-	AADN03026659.1	191	1281
XLOC_029376	-	AADN03026681.1	416	856
XLOC_029380	-	AADN03026689.1	24	693
XLOC_029396	+	AADN03026805.1	908	2297
XLOC_029400	-	AADN03026819.1	2123	3289
XLOC_029406	-	AADN03026843.1	230	1156
XLOC_029409	+	AADN03026867.1	2	1012
XLOC_029419	+	AADN03026913.1	2	1655
XLOC_029420	-	AADN03026913.1	2	1655
XLOC_029421	+	AADN03026926.1	154	5088
XLOC_029422	+	AADN03026935.1	860	1172
XLOC_029437	-	AADN03027032.1	1	1166
XLOC_029441	+	AADN03027051.1	2	1483
XLOC_029458	+	JH375150.1	1699	3259
XLOC_029460	-	JH375151.1	3	4294
XLOC_029514	+	JH375180.1	5360	7781
XLOC_029555	+	JH375204.1	36	1496
XLOC_029556	-	JH375204.1	36	1534
XLOC_029597	-	JH375222.1	2128	3402
XLOC_029664	-	JH375247.1	80	4197
XLOC_029727	-	JH375345.1	3287	5072
XLOC_029771	-	JH375430.1	301	5366
XLOC_029804	+	JH375466.1	376	1638
XLOC_029824	+	JH375494.1	13857	20261
XLOC_029825	-	JH375494.1	13811	18128
XLOC_029832	-	JH375495.1	2553	4963
XLOC_029835	+	JH375497.1	47	1962
XLOC_029898	+	JH375551.1	3287	4817
XLOC_029899	-	JH375551.1	3280	4818
XLOC_029940	-	JH375583.1	2074	2517
XLOC_029961	-	JH375596.1	3771	4689
XLOC_029979	+	JH375614.1	2689	4727
XLOC_030009	+	JH375639.1	27	2598
XLOC_030012	+	JH375641.1	3791	7484
XLOC_030040	+	JH375656.1	2845	4173
XLOC_030042	-	JH375657.1	1806	3648
XLOC_030043	+	JH375658.1	326	1149
XLOC_030044	+	JH375658.1	3905	5077
XLOC_030049	-	JH375666.1	15	1322
XLOC_030051	-	JH375668.1	115	3538
XLOC_030055	-	JH375671.1	902	1355
XLOC_030072	+	JH375689.1	2925	3754
XLOC_030085	+	JH375697.1	70	3372
XLOC_030086	-	JH375697.1	473	3263
XLOC_030110	-	JH375715.1	112	1388
XLOC_030119	+	JH375723.1	278	5000
XLOC_030146	+	JH375740.1	39	1420
XLOC_030147	+	JH375740.1	3482	5073
XLOC_030148	-	JH375740.1	3482	5073
XLOC_030151	+	JH375743.1	436	3869
XLOC_030152	-	JH375743.1	2790	3741
XLOC_030156	+	JH375747.1	294	2040
XLOC_030159	-	JH375749.1	1	1859
XLOC_030160	+	JH375750.1	52	3947
XLOC_030161	-	JH375750.1	89	1836
XLOC_030171	-	JH375761.1	90	1823
XLOC_030172	+	JH375763.1	2879	4929
XLOC_030173	-	JH375764.1	532	1680
XLOC_030176	+	JH375767.1	7281	9090
XLOC_030178	-	JH375768.1	873	3167
XLOC_030182	-	JH375774.1	3617	4792
XLOC_030186	+	JH375778.1	51	925
XLOC_030187	+	JH375780.1	822	4218
XLOC_030192	+	JH375787.1	84	1770
XLOC_030200	-	JH375794.1	4980	5340
XLOC_030204	+	JH375801.1	3092	4903
XLOC_030205	-	JH375801.1	3092	4903
XLOC_030207	-	JH375803.1	339	990
XLOC_030208	+	JH375809.1	3955	4772
XLOC_030209	+	JH375810.1	6	1171
XLOC_030210	+	JH375810.1	3359	4572
XLOC_030211	-	JH375810.1	146	1170
XLOC_030213	+	JH375811.1	1	385
XLOC_030218	-	JH375816.1	554	3424
XLOC_030222	-	JH375826.1	543	1203
XLOC_030225	+	JH375831.1	4105	6154
XLOC_030236	+	JH375844.1	4399	19356
XLOC_030238	+	JH375846.1	496	4191
XLOC_030249	+	JH375869.1	3054	4461
XLOC_030281	+	JH375909.1	2985	6433
XLOC_030290	-	JH375943.1	3163	5269
XLOC_030306	+	JH375967.1	1279	3965
XLOC_030307	+	JH375967.1	5565	14271
XLOC_030308	-	JH375968.1	41	2381
XLOC_030328	+	JH376003.1	4007	6456
XLOC_030334	+	JH376009.1	179	13261
XLOC_030335	+	JH376009.1	13867	17900
XLOC_030336	-	JH376009.1	2	17900
XLOC_030339	+	JH376011.1	2790	4512
XLOC_030350	-	JH376027.1	7892	21911
XLOC_030365	+	JH376055.1	1	1688
XLOC_030366	-	JH376055.1	1	1714
XLOC_030387	-	JH376081.1	72	2192
XLOC_030397	-	JH376108.1	57	2183
XLOC_030403	+	JH376113.1	551	2142
XLOC_030421	-	JH376144.1	54	2209
XLOC_030422	-	JH376144.1	4053	4858
XLOC_030425	+	JH376146.1	96	9150
XLOC_030426	-	JH376146.1	3642	5544
XLOC_030477	-	JH376211.1	33	4309
XLOC_030480	+	JH376214.1	4293	7309
XLOC_030510	+	JH376239.1	9578	12123
XLOC_030540	+	JH376260.1	2214	5604
XLOC_030544	+	JH376267.1	1809	4309
XLOC_030561	+	JH376274.1	85	1025
XLOC_030565	+	JH376276.1	6182	11756
XLOC_030566	-	JH376276.1	7084	11738
XLOC_030588	-	JH376283.1	2	2162
XLOC_030601	-	JH376287.1	25430	32134
XLOC_030620	+	JH376302.1	27710	32915
XLOC_030623	+	JH376305.1	3496	14190
XLOC_030624	-	JH376305.1	649	9292
XLOC_030637	-	JH376314.1	3565	4660
XLOC_030689	-	JH376344.1	1003	4480
XLOC_030776	+	JH376402.1	19946	23982
XLOC_030803	-	JH376413.1	5173	7737
